# Supplementary material for: IOCBIO Sparks detection and analysis software
Source: PeerJ. 2019 Mar 29;7:e6652. doi: 10.7717/peerj.6652 (PMC6442673; doi:10.7717/peerj.6652)
Supplement: Supplemental Information 2 — Sparks and their characteristics detected for experiments performed in the presence of isoprenaline. [file peerj-07-6652-s002.xlsx]

## Sheet: experiment
experiment_id	duration	length	pixels_time	pixels_space	transposed
e6e9236c2894b36ad7b180d77300cd3e1213c3c3691be48a743e096cbdd737d7	91636.4	71.4857	60000	512	0
0a1046659922bfb9e95343369b3e1b93bdfd8ad588558b753266aca5f7e54783	91636.4	73.6852	60000	512	0
19fb6a38a22b3ad556bad2567645240b9fbd37951a3b45dd103833a2b2f9a389	91636.4	71.4286	60000	512	0
cc023c28e5d05e9eece500b92ed0243b74cc5d96ea56cba472bc04149d7c0911	91636.4	72.5609	60000	512	0
097dfc80530ce824b9fb4c7696399b13010391c35c639d2fcd5b12bda223baca	91636.4	71.2452	60000	512	0
9a7a5aae397ea3f5a973d299a2ea9dd33bbd35b1201008ad5e8fec4bb41c0395	91636.4	72.4936	60000	512	0
467afe9dac22dc45adf8f57c98e8cebe32630b9f02d20f3e453e87ce87cb526e	91636.4	72.314	60000	512	0
9b490046284270a293ff5af85f8c6703903e52c3323911a2ad5ba7684a8c0c19	91636.4	72.6287	60000	512	0
c7a853c2abef3faa98ad0a21067536a18ce2266b846a91add8f0b55cc15fa70c	91636.4	71.2906	60000	512	0
c64901f53017c962b84a36f7db978ae392a4bf77b2f439cfbd1bbad087a4c679	91636.4	72.0753	60000	512	0
83b071149d677efac3e2add993c4cf2281ab6eadeeab34b8f006c42a79d9e485	91636.4	71.4381	60000	512	0
63d1731f6b402f8ee281dd524820ab635ce817937f866b86357f9ac67ac9c4bc	91636.4	71.8596	60000	512	0
9a950bd6e3ffb2a841f93234eb693464f9ab1817accf8274b3e15ae87f780a28	91636.4	72.1024	60000	512	0
55df5add6505a2458e13e0d88f8142b2ef4ff6eaa9bf3c9b6bba31910d31f2ce	91636.4	71.817	60000	512	0
ccac98fdc666668233e0f74a9fbef00adc37e4fc42f82551ee9811febd9eee26	91636.4	77.5026	60000	512	0
02259c303a0880f5eebef2349803a390665674b1a9334f85e3a23cf13617c52a	91636.4	71.6583	60000	512	0
3e2bf2fad3e773b39cd0cfffbb44a2d98f3d43e885d8381d4390d7fb13b173da	91636.4	75.5655	60000	512	0
1dc415b4e58253188bd3ad2fca8447414e4d5152cb1855af23d87d257f2675ac	91636.4	75.8846	60000	512	0
a5ccca22adc51e87a416b80a3bc705a7e48ae8b014374bd82a27c6b829e2d641	91636.4	71.4286	60000	512	0
e41d1ab51a2d2b5f46e5d0ea386a12c6a893e058ccada55bf13d91d125867b4b	91636.4	71.4182	60000	512	0

## Sheet: spark
Database key:	experiment_id	spark no	amplitude	amplitude_blurred	amplitude_blurred_f0	amplitude_f0	f0	location_space	location_time	roi_id	space_half_decay	space_half_raise	space_half_width	space_spline_amplitude	space_spline_amplitude_f0	spark_size	time_half_decay	time_half_raise	time_half_width	time_spline_amplitude	time_spline_amplitude_f0
Parameter:			Amplitude	Amplitude blurred	Amplitude blurred/image F0	Amplitude/image F0	F0	Location: space	Location: time		Space: half decay	Space: half raise	Space: half width	Space: spline amplitude	Space: spline amplitude/image F0	Spark size	Time: half decay	Time: half raise	Time: half width	Time: spline amplitude	Time: spline amplitude/image F0
Unit:			AU	AU			AU	microm	ms		microm	microm	microm	AU		microm x ms	ms	ms	ms	AU
	e6e9236c2894b36ad7b180d77300cd3e1213c3c3691be48a743e096cbdd737d7	1	-1.35648	12.3677	1.43871	-0.157796	8.26812	5.16596	41.2364	a8e8ad05-14b1-41d8-97d2-a7fe072d0508	0.531503	1.29471	1.82622	12.1006	1.40763	109.818	23.9763	10.4293	34.4055	10.6379	1.23748
	e6e9236c2894b36ad7b180d77300cd3e1213c3c3691be48a743e096cbdd737d7	2	1.24146	8.05369	0.936866	0.144416	8.50837	4.60748	42.7636	c83f5667-f53e-4e7f-8eb5-267e663e2655	0.629566	0.66223	1.2918	6.91145	0.803992	44.1404	4.0706	4.76526	8.83586	8.24801	0.95947
	e6e9236c2894b36ad7b180d77300cd3e1213c3c3691be48a743e096cbdd737d7	3	11.494	7.96921	0.927038	1.33707	7.97658	3.76976	38.1818	5dc07e49-14d1-4dfc-8b3a-7414320bf986	0.384901	1.00677	1.39167	5.12839	0.596573	16.4194	2.96707	3.59681	6.56388	7.93354	0.922889
	e6e9236c2894b36ad7b180d77300cd3e1213c3c3691be48a743e096cbdd737d7	4	16.3841	10.4656	1.21744	1.90593	6.82033	4.60748	38.1818	d0d89b11-4184-4db4-b882-706ee8d157dd	1.24282	0.523065	1.76588	9.63633	1.12097	101.288	19.376	5.02783	24.4039	10.0577	1.16999
	e6e9236c2894b36ad7b180d77300cd3e1213c3c3691be48a743e096cbdd737d7	5	6.93282	16.6305	1.93459	0.806478	8.44554	4.32824	47.3455	510d8a39-2dd2-4fc8-868f-ec1105869a27	0.829894	0.563895	1.39379	15.7016	1.82653	148.414	6.19352	11.9263	18.1198	14.5567	1.69335
	e6e9236c2894b36ad7b180d77300cd3e1213c3c3691be48a743e096cbdd737d7	6	11.8975	8.06168	0.937796	1.38401	8.52735	3.76976	33.6	c5c31ed3-302b-4753-bfed-c73817d2ab22	0.445861	0.507101	0.952962	7.19496	0.836973	44.9934	25.5019	3.26742	28.7694	8.07709	0.939588
	e6e9236c2894b36ad7b180d77300cd3e1213c3c3691be48a743e096cbdd737d7	7	16.0106	10.7434	1.24975	1.86247	8.63689	3.90938	36.6545	fe0cfe85-bed0-40dd-9e9f-8f3cded54a92	0.448638	0.562333	1.01097	11.1315	1.2949	34.9712	5.06639	6.77779	11.8442	9.41733	1.09549
	e6e9236c2894b36ad7b180d77300cd3e1213c3c3691be48a743e096cbdd737d7	8	10.1702	10.5694	1.22951	1.18307	8.55044	3.90938	35.1273	c4625cc2-3175-4db9-911a-b387f91aa6e0	0.843281	0.640042	1.48332	9.42535	1.09643	46.2728	5.1237	4.15971	9.28341	10.5756	1.23023
	e6e9236c2894b36ad7b180d77300cd3e1213c3c3691be48a743e096cbdd737d7	9	1.78958	8.5416	0.993624	0.208178	8.52447	4.46786	38.1818	3f0ec62d-7aec-4490-ad3e-ba59e5c4a054	0.651302	1.59166	2.24296	8.38674	0.975609	41.3683	8.66498	6.41122	15.0762	8.97171	1.04366
	e6e9236c2894b36ad7b180d77300cd3e1213c3c3691be48a743e096cbdd737d7	10	19.591	7.72135	0.898206	2.27898	7.7876	5.02634	39.7091	42e0fc01-96ff-4d77-abc3-115ba5440bd1	0.756625	1.70202	2.45864	6.64795	0.77334	48.6184	3.138	4.71783	7.85583	9.9614	1.15879
	e6e9236c2894b36ad7b180d77300cd3e1213c3c3691be48a743e096cbdd737d7	11	18.6692	11.6942	1.36036	2.17174	8.4257	5.02634	38.1818	e5669202-3bd4-4e88-8b6f-333d10ce846b	0.566874	1.42302	1.98989	9.69482	1.12778	65.2511	3.61848	6.97625	10.5947	11.4672	1.33395
	e6e9236c2894b36ad7b180d77300cd3e1213c3c3691be48a743e096cbdd737d7	12	11.9179	8.61857	1.00258	1.38637	8.55959	3.35089	50.4	7cefee68-bac0-4b5a-92a4-6de193011035	0.500019	0.41333	0.91335	7.50283	0.872786	37.53	3.43623	19.9568	23.393	7.52165	0.874974
	e6e9236c2894b36ad7b180d77300cd3e1213c3c3691be48a743e096cbdd737d7	13	5.63265	8.457	0.983782	0.655233	8.57246	4.18862	35.1273	639f83b1-9287-43c4-8970-db1933a7839b	0.65764	0.493615	1.15125	9.46573	1.10113	49.6846	5.49469	3.27901	8.7737	10.6929	1.24387
	e6e9236c2894b36ad7b180d77300cd3e1213c3c3691be48a743e096cbdd737d7	14	8.79663	8.48809	0.987399	1.02329	8.48437	4.7471	35.1273	c1830893-b0a3-469f-8235-0e4aa963509d	0.388136	0.489987	0.878123	10.8538	1.26259	27.5078	11.9981	4.43746	16.4355	9.27946	1.07946
	e6e9236c2894b36ad7b180d77300cd3e1213c3c3691be48a743e096cbdd737d7	15	7.53466	8.86901	1.03171	0.876489	8.67377	3.63014	35.1273	405a2975-2ec2-4f96-8e5f-45d6ac29bacd	0.596821	0.625216	1.22204	8.31691	0.967486	26.0151	14.0357	3.38755	17.4232	9.08658	1.05702
	e6e9236c2894b36ad7b180d77300cd3e1213c3c3691be48a743e096cbdd737d7	16	9.56122	10.3837	1.20791	1.11223	8.6557	3.63014	45.8182	59e7c469-06cc-4fe3-9dbd-8f1baf90f294	1.13237	0.679047	1.81142	7.79103	0.906311	49.0449	5.22789	15.8922	21.1201	8.20944	0.954984
	e6e9236c2894b36ad7b180d77300cd3e1213c3c3691be48a743e096cbdd737d7	17	17.1044	12.5598	1.46105	1.98971	8.59821	4.88672	41.2364	b1527ceb-324b-4065-9f6f-0acaa7edbf76	0.522582	1.38973	1.91231	8.06741	0.938462	75.06	9.6822	4.17321	13.8554	9.73607	1.13257
	e6e9236c2894b36ad7b180d77300cd3e1213c3c3691be48a743e096cbdd737d7	18	-1.50824	12.9501	1.50645	-0.17545	8.76701	3.76976	36.6545	e1587eaf-de74-48e2-a892-408be94379b4	0.429659	0.545551	0.975209	12.7742	1.48599	30.4931	9.53795	4.48987	14.0278	13.0108	1.51352
	e6e9236c2894b36ad7b180d77300cd3e1213c3c3691be48a743e096cbdd737d7	19	12.6328	8.19513	0.953319	1.46954	8.49174	5.72444	44.2909	4347d814-5674-4c30-af9d-2e08c138e922	1.03894	1.60156	2.6405	6.27084	0.729472	52.2435	7.5435	7.97082	15.5143	6.59411	0.767077
	e6e9236c2894b36ad7b180d77300cd3e1213c3c3691be48a743e096cbdd737d7	20	9.2167	11.5098	1.33891	1.07216	8.70649	3.90938	45.8182	666b03a8-2e8f-491d-aa0b-c90854cd8eaf	0.404197	0.837778	1.24198	9.20916	1.07128	29.0005	2.24536	4.39329	6.63865	14.8225	1.72427
	e6e9236c2894b36ad7b180d77300cd3e1213c3c3691be48a743e096cbdd737d7	21	2.40171	9.01952	1.04922	0.279385	8.62631	4.7471	35.1273	b42c89a0-de77-4e8b-a621-417f075f5fe2	0.914496	0.571721	1.48622	8.8716	1.03201	33.905	7.99766	4.2222	12.2199	8.26971	0.961995
	e6e9236c2894b36ad7b180d77300cd3e1213c3c3691be48a743e096cbdd737d7	22	15.2838	13.9053	1.61756	1.77793	9.17728	4.60748	41.2364	a2338a25-3221-4d17-a2bb-bbdece9b38ac	1.83162	0.883674	2.71529	10.2389	1.19107	92.5456	5.60771	10.4123	16.02	13.5159	1.57227
	e6e9236c2894b36ad7b180d77300cd3e1213c3c3691be48a743e096cbdd737d7	23	11.7616	10.5825	1.23104	1.3682	8.52761	5.02634	36.6545	a75cc11b-f150-4078-8314-350caf7bf29a	0.758304	0.942014	1.70032	8.08635	0.940665	58.2142	4.36391	5.01882	9.38272	10.1628	1.18221
	e6e9236c2894b36ad7b180d77300cd3e1213c3c3691be48a743e096cbdd737d7	24	21.0113	18.3755	2.13757	2.44419	9.02951	6.98103	39.7091	721e4f9e-ca62-4a21-b8ff-9f2831d1620c	0.695164	0.80833	1.50349	16.5253	1.92235	313.674	76.1475	4.71726	80.8648	16.1175	1.87491
	e6e9236c2894b36ad7b180d77300cd3e1213c3c3691be48a743e096cbdd737d7	25	15.4499	10.8402	1.26101	1.79725	8.82052	4.049	50.4	759a38bf-5237-4aa8-81f7-9316757ac375	0.425114	1.30886	1.73398	7.18229	0.835498	28.1475	2.09287	7.47905	9.57192	9.71344	1.12994
	e6e9236c2894b36ad7b180d77300cd3e1213c3c3691be48a743e096cbdd737d7	26	31.9558	20.5661	2.39241	3.71734	9.32585	4.60748	41.2364	aaabf777-1534-4e95-a93d-05008b5b7b75	0.535615	0.911928	1.44754	18.9851	2.20849	83.5896	5.18116	5.80648	10.9876	21.1029	2.45484
	e6e9236c2894b36ad7b180d77300cd3e1213c3c3691be48a743e096cbdd737d7	27	8.15942	18.0122	2.09531	0.949166	9.18266	5.16596	42.7636	c36f60a5-339a-4a08-9594-10cbba036caf	0.652485	0.468701	1.12119	17.8784	2.07975	116.215	6.66938	6.91796	13.5873	17.1099	1.99035
	e6e9236c2894b36ad7b180d77300cd3e1213c3c3691be48a743e096cbdd737d7	28	20.1836	17.3359	2.01664	2.34791	9.28997	4.46786	36.6545	b9bcb205-4559-400e-896d-62292213670b	0.658037	1.11815	1.77618	15.59	1.81355	85.2955	5.85014	3.86308	9.71322	19.279	2.24268
	e6e9236c2894b36ad7b180d77300cd3e1213c3c3691be48a743e096cbdd737d7	29	4.35215	14.9999	1.74491	0.506275	9.10689	6.70179	42.7636	d769413b-f840-49e9-aeeb-da818372396c	0.560226	1.36671	1.92694	14.3221	1.66605	142.443	23.4585	4.29151	27.75	14.7501	1.71585
	e6e9236c2894b36ad7b180d77300cd3e1213c3c3691be48a743e096cbdd737d7	30	16.6635	21.1306	2.45807	1.93843	9.28855	4.18862	51.9273	fd6b209a-310c-4caa-a541-041549f0cbd8	1.40903	0.533325	1.94235	15.6032	1.81508	87.4279	4.16342	5.18015	9.34357	20.9443	2.4364
	e6e9236c2894b36ad7b180d77300cd3e1213c3c3691be48a743e096cbdd737d7	31	32.9138	15.9925	1.86037	3.82878	9.33021	4.60748	42.7636	bd30a17f-a564-494d-8abe-4e528cf6b90f	0.702636	0.896398	1.59903	15.5905	1.81361	123.039	6.70302	5.23163	11.9346	17.4108	2.02536
	e6e9236c2894b36ad7b180d77300cd3e1213c3c3691be48a743e096cbdd737d7	32	-1.16851	8.61836	1.00255	-0.13593	7.86827	4.049	42.7636	70005bbb-6e67-41fe-af46-51f765f6fcdb	0.49461	1.29694	1.79155	7.26298	0.844885	37.1035	7.92548	3.98962	11.9151	7.57444	0.881116
	e6e9236c2894b36ad7b180d77300cd3e1213c3c3691be48a743e096cbdd737d7	33	10.5061	15.9036	1.85003	1.22214	9.33723	5.02634	38.1818	cff0df74-c86b-4566-b34d-b1a78e0d6ed5	0.528007	1.33969	1.8677	13.2328	1.53933	62.6922	5.62026	3.85669	9.47695	15.412	1.79284
	e6e9236c2894b36ad7b180d77300cd3e1213c3c3691be48a743e096cbdd737d7	34	13.2764	14.3912	1.67409	1.54441	9.3381	4.88672	42.7636	49c1e048-6ff8-416d-8cf4-3eae24f4e185	0.577663	1.36987	1.94753	13.726	1.59671	87.2146	4.92266	11.5925	16.5152	13.5265	1.57351
	e6e9236c2894b36ad7b180d77300cd3e1213c3c3691be48a743e096cbdd737d7	35	31.6697	18.2313	2.12081	3.68406	9.33313	4.60748	38.1818	ae7032ab-5e9d-47f9-9c19-642f30fa566d	0.649007	0.5447	1.19371	18.8332	2.19082	136.686	10.6314	7.58368	18.2151	17.5663	2.04344
	e6e9236c2894b36ad7b180d77300cd3e1213c3c3691be48a743e096cbdd737d7	36	5.91884	12.6948	1.47676	0.688524	9.36833	4.46786	38.1818	9bc8a41d-868c-478c-ac2d-1118c9a7c7dd	0.981231	0.819176	1.80041	13.4349	1.56285	91.0529	21.5814	6.81573	28.3971	14.9853	1.74321
	e6e9236c2894b36ad7b180d77300cd3e1213c3c3691be48a743e096cbdd737d7	37	16.2274	14.7534	1.71623	1.88769	9.33289	5.30558	44.2909	ca45f4f8-ade8-48f5-81aa-835148650277	0.476072	1.62307	2.09914	10.9306	1.27153	81.0307	5.56745	6.88739	12.4548	12.0173	1.39794
	e6e9236c2894b36ad7b180d77300cd3e1213c3c3691be48a743e096cbdd737d7	38	21.6202	16.3508	1.90205	2.51503	9.44952	4.32824	41.2364	0031a1e1-cfd4-4efd-93f6-4179ec42ea78	1.08749	0.912377	1.99986	12.88	1.49829	62.9054	4.23426	6.41102	10.6453	16.8787	1.96345
	e6e9236c2894b36ad7b180d77300cd3e1213c3c3691be48a743e096cbdd737d7	39	7.78774	15.4487	1.79711	0.905928	9.36136	4.7471	36.6545	a00b6c4b-523a-4008-8224-1aa48ca03ee3	0.54572	0.980477	1.5262	14.5847	1.69661	60.773	4.954	4.34949	9.30349	17.0632	1.98492
	e6e9236c2894b36ad7b180d77300cd3e1213c3c3691be48a743e096cbdd737d7	40	34.0383	14.4694	1.68319	3.95959	9.39579	4.7471	38.1818	d490487e-b7e1-4e54-ad0c-19b51d0c578d	0.753819	1.09786	1.85168	11.9338	1.38823	88.7073	6.40372	8.78118	15.1849	12.4719	1.45082
	e6e9236c2894b36ad7b180d77300cd3e1213c3c3691be48a743e096cbdd737d7	41	27.8939	11.2869	1.31297	3.24483	7.67815	6.14331	47.3455	b794764e-45a3-4396-b3a5-834ff8219cbc	1.38721	2.51463	3.90183	7.76384	0.903148	140.098	16.2328	11.587	27.8198	10.7386	1.24919
	e6e9236c2894b36ad7b180d77300cd3e1213c3c3691be48a743e096cbdd737d7	42	18.388	19.7387	2.29615	2.13904	9.38454	5.4452	39.7091	187c4bb7-5c44-45fa-8eee-bbe6a3e3ee15	0.600144	1.51107	2.11122	15.5699	1.8112	85.0823	4.27283	4.23178	8.50462	20.0465	2.33196
	e6e9236c2894b36ad7b180d77300cd3e1213c3c3691be48a743e096cbdd737d7	43	29.5617	16.6137	1.93263	3.43884	9.4951	4.18862	39.7091	76f2efd3-1c13-437c-b700-2fdd835219cc	1.17574	1.11335	2.2891	10.4064	1.21055	66.5305	4.44169	10.4532	14.8949	12.9524	1.50673
	e6e9236c2894b36ad7b180d77300cd3e1213c3c3691be48a743e096cbdd737d7	44	-2.44135	11.8392	1.37723	-0.283996	9.45424	4.46786	42.7636	170e6230-4434-445d-a8ed-c28357329070	0.877936	0.939822	1.81776	10.2584	1.19333	107.046	16.6214	4.58835	21.2098	11.6107	1.35064
	e6e9236c2894b36ad7b180d77300cd3e1213c3c3691be48a743e096cbdd737d7	45	12.3641	11.9987	1.39578	1.43828	8.38206	4.88672	35.1273	8f4c5cca-1018-482a-af71-3c956fa4e729	0.480591	1.19075	1.67134	9.91749	1.15368	100.649	16.4647	3.71199	20.1767	9.46609	1.10117
	e6e9236c2894b36ad7b180d77300cd3e1213c3c3691be48a743e096cbdd737d7	46	11.1666	19.599	2.2799	1.29898	9.36882	5.16596	39.7091	2269fbf5-9187-4365-ac10-c61bb452cd2d	0.446292	0.618932	1.06522	17.2353	2.00494	93.1853	6.06081	6.36231	12.4231	17.4995	2.03567
	e6e9236c2894b36ad7b180d77300cd3e1213c3c3691be48a743e096cbdd737d7	47	10.4076	14.1353	1.64432	1.21069	9.43264	4.049	41.2364	c732e360-3e38-4ac9-9b09-2fdf1c4cb016	2.01994	0.897425	2.91736	10.7449	1.24993	93.6118	17.7456	10.5295	28.2751	10.9005	1.26803
	e6e9236c2894b36ad7b180d77300cd3e1213c3c3691be48a743e096cbdd737d7	48	10.1494	15.6765	1.82361	1.18066	9.5092	4.46786	36.6545	1624eb09-6ab5-43c2-baf1-063523ce1bd2	0.473035	1.11921	1.59224	12.2405	1.42391	70.582	6.04301	3.39023	9.43324	16.0515	1.86723
	e6e9236c2894b36ad7b180d77300cd3e1213c3c3691be48a743e096cbdd737d7	49	7.72639	14.8054	1.72228	0.898792	9.37619	4.88672	42.7636	cc98ae5a-e20d-4256-9ec9-a1dcf6e8a08f	0.829056	0.989029	1.81809	12.5527	1.46023	98.7295	7.55644	11.4422	18.9987	13.2343	1.53951
	e6e9236c2894b36ad7b180d77300cd3e1213c3c3691be48a743e096cbdd737d7	50	25.7495	16.2596	1.89143	2.99538	9.32787	5.4452	41.2364	ac9dfcd0-32dc-4542-9f06-8d9b119ea0e6	1.02744	0.660653	1.68809	16.1684	1.88083	97.4501	7.67696	9.62791	17.3049	16.937	1.97024
	e6e9236c2894b36ad7b180d77300cd3e1213c3c3691be48a743e096cbdd737d7	51	13.213	12.6158	1.46756	1.53703	9.52594	4.7471	42.7636	9c8bfeb3-c610-4813-84f1-ae04c8754ee3	0.675133	1.81859	2.49372	10.636	1.23726	90.6265	10.9384	11.5585	22.4969	10.9762	1.27684
	e6e9236c2894b36ad7b180d77300cd3e1213c3c3691be48a743e096cbdd737d7	52	9.85905	8.02172	0.933147	1.14688	7.75924	6.28293	51.9273	da73b000-311e-4173-bdf3-c016fcb1e84d	1.75319	2.2666	4.01979	5.79627	0.674265	216.437	61.9594	18.1403	80.0997	6.39568	0.743994
	e6e9236c2894b36ad7b180d77300cd3e1213c3c3691be48a743e096cbdd737d7	53	18.5563	9.13845	1.06305	2.15861	8.08274	4.46786	61.0909	ec703329-f249-4713-9ccc-f031733e7299	0.584156	1.09295	1.67711	7.55384	0.87872	53.7362	4.16173	10.3621	14.5238	8.72866	1.01538
	e6e9236c2894b36ad7b180d77300cd3e1213c3c3691be48a743e096cbdd737d7	54	15.5519	10.6426	1.23803	1.80911	8.5806	4.18862	38.1818	c7d4bd0a-0e43-4754-b798-6c8ff119a113	0.42674	0.808123	1.23486	10.3578	1.20489	24.3092	3.42798	4.14588	7.57386	11.7753	1.3698
	e6e9236c2894b36ad7b180d77300cd3e1213c3c3691be48a743e096cbdd737d7	55	16.1501	12.9104	1.50183	1.87871	8.04936	4.18862	36.6545	928f9240-d9e3-473b-ab46-483eb9bc31a4	0.840649	0.986892	1.82754	10.6175	1.23511	60.1333	4.47208	3.57282	8.0449	15.3044	1.78032
	e6e9236c2894b36ad7b180d77300cd3e1213c3c3691be48a743e096cbdd737d7	56	30.4742	15.7812	1.83579	3.54499	9.44247	4.32824	38.1818	a00d082b-ee12-4350-bc0e-fff54e3f75c9	1.1227	0.775384	1.89808	12.473	1.45095	82.0969	4.65637	4.383	9.03937	15.9401	1.85427
	e6e9236c2894b36ad7b180d77300cd3e1213c3c3691be48a743e096cbdd737d7	57	19.6905	14.0021	1.62883	2.29054	9.42315	4.60748	41.2364	b4753323-604d-4360-b28f-1a2c244a7bc5	0.642666	0.922625	1.56529	13.0352	1.51635	91.9059	22.3205	4.48968	26.8102	14.1327	1.64403
	e6e9236c2894b36ad7b180d77300cd3e1213c3c3691be48a743e096cbdd737d7	58	24.4699	16.0598	1.8682	2.84652	9.367	5.16596	36.6545	c1483419-9a3a-4ddc-bbb4-b8586a666aba	0.729941	0.813765	1.54371	13.8279	1.60857	87.8544	10.0096	3.37917	13.3887	16.714	1.9443
	e6e9236c2894b36ad7b180d77300cd3e1213c3c3691be48a743e096cbdd737d7	59	40.9354	17.1737	1.99777	4.76191	9.53631	4.46786	38.1818	eedf1fc3-911c-4646-b9c5-20360de64720	0.524397	0.738098	1.2625	15.5157	1.8049	65.2511	4.28512	3.66176	7.94688	18.9662	2.20629
	e6e9236c2894b36ad7b180d77300cd3e1213c3c3691be48a743e096cbdd737d7	60	26.1014	16.9804	1.97529	3.03631	9.41161	5.16596	38.1818	c901e8a8-151c-4428-9489-e486f13a7302	0.556438	1.52291	2.07935	11.3547	1.32086	83.3763	4.83403	4.47257	9.30659	13.6916	1.59271
	e6e9236c2894b36ad7b180d77300cd3e1213c3c3691be48a743e096cbdd737d7	61	24.6828	18.9797	2.20786	2.87129	9.44082	4.60748	36.6545	26a98495-4034-4712-a2ce-53aff12afb04	0.578661	0.902174	1.48084	19.4247	2.25963	65.4643	8.27995	4.14729	12.4272	19.4837	2.2665
	e6e9236c2894b36ad7b180d77300cd3e1213c3c3691be48a743e096cbdd737d7	62	26.4674	17.8703	2.07881	3.07888	9.32302	5.58482	36.6545	ffd848ad-9ae9-45c9-a1b4-7e37859f3b85	0.471946	0.667276	1.13922	17.9582	2.08903	94.4648	7.40784	5.36356	12.7714	17.4104	2.02531
	e6e9236c2894b36ad7b180d77300cd3e1213c3c3691be48a743e096cbdd737d7	63	18.6364	19.5218	2.27092	2.16793	9.44644	4.18862	42.7636	47fa0ba6-3b20-4aff-97a2-26779f1b462a	0.926591	0.521486	1.44808	15.5954	1.81417	121.333	13.8648	10.0827	23.9475	15.325	1.78272
	e6e9236c2894b36ad7b180d77300cd3e1213c3c3691be48a743e096cbdd737d7	64	10.0353	15.4458	1.79677	1.16738	9.38392	4.88672	47.3455	70b6fd40-58c2-46ce-a1b5-0a82c347314d	0.506787	1.08217	1.58896	14.7993	1.72157	80.1778	17.9868	8.44504	26.4318	12.4511	1.4484
	e6e9236c2894b36ad7b180d77300cd3e1213c3c3691be48a743e096cbdd737d7	65	19.9085	16.1688	1.88087	2.31591	9.42149	4.60748	45.8182	fc6a9507-ed71-45b2-a0ba-187d757798a8	0.502723	0.873232	1.37595	15.1815	1.76603	75.913	8.51428	10.0725	18.5868	14.7735	1.71856
	e6e9236c2894b36ad7b180d77300cd3e1213c3c3691be48a743e096cbdd737d7	66	23.9075	15.3029	1.78015	2.7811	9.35216	5.02634	38.1818	41f6184e-1d60-4ce9-b569-cdd612cdb87f	0.553114	1.05328	1.6064	14.4154	1.6769	83.8028	20.7431	7.97338	28.7165	13.9417	1.62181
	e6e9236c2894b36ad7b180d77300cd3e1213c3c3691be48a743e096cbdd737d7	67	11.6335	13.7866	1.60376	1.3533	9.35942	5.16596	36.6545	78a3cf34-6960-4928-a7a3-3913e52f7796	0.743424	0.603133	1.34656	12.1544	1.4139	80.391	13.5686	3.58883	17.1574	14.2199	1.65417
	e6e9236c2894b36ad7b180d77300cd3e1213c3c3691be48a743e096cbdd737d7	68	22.0495	16.716	1.94453	2.56497	9.39831	5.02634	38.1818	7494eafc-6c9d-4dd2-9d74-143f298dcf51	0.611325	1.32626	1.93758	13.3708	1.55539	85.2955	4.69531	3.577	8.27231	17.7273	2.06217
	e6e9236c2894b36ad7b180d77300cd3e1213c3c3691be48a743e096cbdd737d7	69	16.6097	10.662	1.24029	1.93217	8.90045	4.88672	48.8727	59ba29aa-2955-4b64-af97-fe93c638246b	0.508756	1.89048	2.39924	8.11582	0.944093	90.6265	32.358	5.06618	37.4241	8.2887	0.964205
	e6e9236c2894b36ad7b180d77300cd3e1213c3c3691be48a743e096cbdd737d7	70	17.6343	16.9255	1.96891	2.05135	9.39348	4.049	41.2364	72c80a70-b640-4da9-8b17-142ccaf3af67	0.582989	0.55184	1.13483	15.043	1.74991	85.0823	5.54342	7.79731	13.3407	16.4778	1.91682
	e6e9236c2894b36ad7b180d77300cd3e1213c3c3691be48a743e096cbdd737d7	71	12.6297	13.0029	1.51259	1.46918	9.40644	3.63014	39.7091	3cc1e5df-900d-43d8-bfd0-3edef657d5b4	1.45749	0.686679	2.14417	12.4861	1.45247	58.8539	8.28419	6.8849	15.1691	12.5059	1.45478
	e6e9236c2894b36ad7b180d77300cd3e1213c3c3691be48a743e096cbdd737d7	72	37.4991	15.5434	1.80812	4.36218	9.3473	4.60748	42.7636	0ce483c5-b5e4-4ac8-95c4-1312807f2f83	0.492863	0.661377	1.15424	16.066	1.86892	96.5971	10.9564	6.89564	17.8521	16.3086	1.89714
	e6e9236c2894b36ad7b180d77300cd3e1213c3c3691be48a743e096cbdd737d7	73	11.7018	14.9432	1.7383	1.36125	9.34983	4.7471	36.6545	d2979e05-4dc5-470b-b485-c23447194497	0.690437	1.27759	1.96802	12.5364	1.45833	113.656	21.4413	3.8399	25.2812	13.9925	1.62772
	e6e9236c2894b36ad7b180d77300cd3e1213c3c3691be48a743e096cbdd737d7	74	4.79288	9.59256	1.11588	0.557543	8.27964	4.32824	38.1818	f2077fd5-53ac-49a6-ab6a-3b8362e10fee	0.920485	0.539329	1.45981	8.76982	1.02017	34.1182	12.1228	5.98917	18.112	9.04574	1.05227
	e6e9236c2894b36ad7b180d77300cd3e1213c3c3691be48a743e096cbdd737d7	75	17.7128	17.8903	2.08113	2.06048	9.26207	5.30558	39.7091	8754a441-3291-4966-afb9-8c46719b02ec	0.464944	0.871002	1.33595	17.1777	1.99824	102.141	5.64217	3.92159	9.56376	19.1882	2.23211
	e6e9236c2894b36ad7b180d77300cd3e1213c3c3691be48a743e096cbdd737d7	76	14.0425	8.50927	0.989863	1.63353	8.67374	3.35089	39.7091	9ee62cb5-50c8-4eab-8b59-a411dcfeabf9	0.433344	0.566516	0.99986	6.40302	0.744848	11.0884	2.3173	4.49816	6.81546	8.34219	0.970427
	e6e9236c2894b36ad7b180d77300cd3e1213c3c3691be48a743e096cbdd737d7	77	23.7162	19.1461	2.22722	2.75884	9.31699	4.7471	41.2364	27535236-981d-48e8-9b11-dbba98d0adee	0.981646	0.931893	1.91354	17.475	2.03282	69.5158	3.90711	8.42864	12.3357	19.0229	2.21289
	e6e9236c2894b36ad7b180d77300cd3e1213c3c3691be48a743e096cbdd737d7	78	16.9638	14.8412	1.72644	1.97336	9.23604	6.14331	44.2909	2fb822a2-a390-422c-96cd-88cbdff334d7	0.872576	1.63344	2.50602	10.8309	1.25993	68.8761	3.37872	10.544	13.9228	13.238	1.53994
	e6e9236c2894b36ad7b180d77300cd3e1213c3c3691be48a743e096cbdd737d7	79	5.50303	10.5872	1.23159	0.640154	8.67906	5.58482	33.6	6c5b4183-03df-4ce6-919e-20c8007f81d4	0.466013	0.583668	1.04968	8.97362	1.04388	65.8908	16.1865	3.36727	19.5538	9.17221	1.06698
	e6e9236c2894b36ad7b180d77300cd3e1213c3c3691be48a743e096cbdd737d7	80	4.69645	7.01734	0.81631	0.546327	7.62472	4.46786	35.1273	c32c2045-0edb-4e33-8b8e-3bfb68428340	1.17294	1.899	3.07195	5.81034	0.675903	23.0298	3.19291	4.7907	7.98361	6.89915	0.802562
	e6e9236c2894b36ad7b180d77300cd3e1213c3c3691be48a743e096cbdd737d7	81	20.955	10.2522	1.19261	2.43764	8.04216	5.72444	41.2364	37d53608-6c6e-4a78-b7cb-01e60820e806	0.617455	0.736857	1.35431	9.09216	1.05767	133.487	38.2732	5.80871	44.082	9.08527	1.05687
	e6e9236c2894b36ad7b180d77300cd3e1213c3c3691be48a743e096cbdd737d7	82	12.2319	15.657	1.82134	1.4229	8.1938	3.63014	145.091	9a1c2672-0a72-468d-9b1d-e3affe69cbbc	0.891364	1.25978	2.15115	13.9461	1.62232	178.694	29.3437	12.7548	42.0985	10.57	1.22958
	e6e9236c2894b36ad7b180d77300cd3e1213c3c3691be48a743e096cbdd737d7	83	24.6346	13.1378	1.52828	2.86569	8.52992	4.88672	54.9818	e6950d36-9d9e-4a41-8419-21c1f086f114	0.958577	0.882117	1.84069	9.968	1.15955	127.09	6.04936	7.32875	13.3781	10.9082	1.26893
	e6e9236c2894b36ad7b180d77300cd3e1213c3c3691be48a743e096cbdd737d7	84	6.74864	13.8661	1.61301	0.785052	8.73545	4.049	45.8182	67ccf092-a2c1-4a50-b5d8-76c67e88e27f	0.6676	0.549342	1.21694	10.2293	1.18995	99.5825	7.24849	5.88239	13.1309	11.1906	1.30177
	e6e9236c2894b36ad7b180d77300cd3e1213c3c3691be48a743e096cbdd737d7	85	11.4913	10.8338	1.26027	1.33675	8.75815	3.90938	39.7091	b336dd0b-1d94-4db2-bbde-378127a3b053	1.33503	0.923984	2.25901	6.57739	0.765131	66.3172	18.0221	8.9481	26.9702	8.45007	0.982976
	e6e9236c2894b36ad7b180d77300cd3e1213c3c3691be48a743e096cbdd737d7	86	17.4447	10.103	1.17526	2.0293	9.11989	4.32824	35.1273	f77d6e72-6710-478c-9056-80b36c40fe4e	0.54369	0.690479	1.23417	8.0867	0.940705	34.5447	4.20608	4.77709	8.98318	7.63656	0.888343
	e6e9236c2894b36ad7b180d77300cd3e1213c3c3691be48a743e096cbdd737d7	87	10.0493	10.4166	1.21174	1.16901	8.4537	4.32824	61.0909	2458336d-1a61-414a-9a7c-2864067c6e12	0.475872	1.20508	1.68095	5.49197	0.638868	84.0161	6.07072	43.9298	50.0006	7.04158	0.81913
	e6e9236c2894b36ad7b180d77300cd3e1213c3c3691be48a743e096cbdd737d7	88	-2.71849	7.82255	0.909978	-0.316236	9.87437	1.67545	142.036	d7bd72cf-a5d1-428f-91d3-5aba6171dc35	1.58002	1.20437	2.78439	4.42958	0.515282	29.2137	23.2172	66.3051	89.5223	3.89453	0.453042
	e6e9236c2894b36ad7b180d77300cd3e1213c3c3691be48a743e096cbdd737d7	89	2.35235	8.66673	1.00818	0.273643	9.18012	6.00369	51.9273	a8e762c4-d030-4514-87cb-48829daf58e0	0.986906	0.92201	1.90892	6.77388	0.787988	54.1626	6.66841	15.9599	22.6283	6.04858	0.703617
	e6e9236c2894b36ad7b180d77300cd3e1213c3c3691be48a743e096cbdd737d7	90	13.8739	13.3856	1.55712	1.61392	8.6711	3.90938	39.7091	c50b4011-a0d9-4bfe-8012-838f2db0325a	1.09449	0.994211	2.0887	10.0097	1.1644	68.8761	3.23465	7.63464	10.8693	12.7486	1.48301
	e6e9236c2894b36ad7b180d77300cd3e1213c3c3691be48a743e096cbdd737d7	91	8.94293	9.07549	1.05573	1.04031	8.58223	3.76976	58.0364	d5f838a0-48c5-4524-95dd-d0d2df9e57a1	2.42431	0.654363	3.07867	4.24832	0.494196	54.1626	3.53687	24.7391	28.2759	7.06842	0.822252
	e6e9236c2894b36ad7b180d77300cd3e1213c3c3691be48a743e096cbdd737d7	92	2.9394	11.6597	1.35634	0.341933	8.66598	4.88672	47.3455	40dc3618-af26-4bdb-8359-d2001aeaf5b9	2.84368	0.611444	3.45513	8.6474	1.00593	156.304	5.57527	5.11598	10.6913	10.5552	1.22786
	e6e9236c2894b36ad7b180d77300cd3e1213c3c3691be48a743e096cbdd737d7	93	9.97927	10.4277	1.21303	1.16086	9.36807	4.46786	53.4545	5c101e13-ba2e-4f3f-a4a2-4c9eca11b193	0.832796	0.65858	1.49138	10.0243	1.1661	81.4572	7.26708	22.3241	29.5911	9.65661	1.12333
	e6e9236c2894b36ad7b180d77300cd3e1213c3c3691be48a743e096cbdd737d7	94	13.9435	16.1126	1.87434	1.62201	8.92539	5.30558	38.1818	1f8e8805-243b-4f2b-b305-ec9b6c7c1b79	0.84212	0.66764	1.50976	13.0519	1.5183	221.555	71.9493	7.57135	79.5207	11.9617	1.39148
	e6e9236c2894b36ad7b180d77300cd3e1213c3c3691be48a743e096cbdd737d7	95	28.7887	17.9695	2.09035	3.34892	9.04205	5.16596	42.7636	c821b3f9-c661-4e4c-8c69-440432769a7a	1.07024	0.819017	1.88925	17.9512	2.08822	424.985	28.3491	10.9327	39.2818	15.6552	1.82113
	e6e9236c2894b36ad7b180d77300cd3e1213c3c3691be48a743e096cbdd737d7	96	-0.306455	7.78777	0.905932	-0.0356492	9.40909	5.02634	53.4545	bfbb0893-33e4-43ab-ae51-653033ff3cce	0.299428	0.70577	1.0052	5.58433	0.649612	43.7139	3.81247	5.47959	9.29206	6.99157	0.813312
	e6e9236c2894b36ad7b180d77300cd3e1213c3c3691be48a743e096cbdd737d7	97	11.674	9.45317	1.09966	1.35801	9.90365	4.18862	41.2364	5a67dd96-4648-42f2-8bd1-0f9f19dbe942	0.51779	2.94832	3.46611	5.39714	0.627836	23.4563	2.57372	12.7146	15.2883	6.46925	0.752552
	e6e9236c2894b36ad7b180d77300cd3e1213c3c3691be48a743e096cbdd737d7	98	5.09358	8.40872	0.978166	0.592524	8.44315	4.7471	47.3455	e5303b1d-c1c8-4156-9293-7ca458c36688	0.468116	1.61971	2.08783	7.61667	0.886028	62.479	4.5698	5.51462	10.0844	8.64112	1.0052
	e6e9236c2894b36ad7b180d77300cd3e1213c3c3691be48a743e096cbdd737d7	99	15.976	9.68186	1.12627	1.85845	9.34859	4.60748	39.7091	720b785b-ccc2-4d58-9b93-14661036c782	1.38741	1.74077	3.12818	6.41057	0.745725	96.8104	42.5848	9.55862	52.1434	6.46702	0.752292
	e6e9236c2894b36ad7b180d77300cd3e1213c3c3691be48a743e096cbdd737d7	100	10.8327	11.8288	1.37602	1.26014	9.3778	4.60748	47.3455	3b8a50ae-1ce7-4ebd-adf2-f885a79b5702	0.467849	0.975968	1.44382	8.91833	1.03745	53.5229	12.0934	5.34974	17.4432	11.6349	1.35345
	e6e9236c2894b36ad7b180d77300cd3e1213c3c3691be48a743e096cbdd737d7	101	19.7948	10.2662	1.19424	2.30268	9.4354	5.16596	47.3455	1645f450-34e4-4308-bc59-372004008346	0.486179	2.39805	2.88422	9.32648	1.08493	67.5967	4.76433	7.88631	12.6506	9.02896	1.05032
	e6e9236c2894b36ad7b180d77300cd3e1213c3c3691be48a743e096cbdd737d7	102	9.03993	8.44606	0.982509	1.05159	8.7672	3.90938	35.1273	744a1755-169f-4389-8d49-5c7ee2cf12bb	0.409386	0.972396	1.38178	6.41137	0.745819	13.8605	6.15321	4.25538	10.4086	7.35176	0.855213
	e6e9236c2894b36ad7b180d77300cd3e1213c3c3691be48a743e096cbdd737d7	103	12.4561	9.51264	1.10658	1.44898	9.38019	5.86407	50.4	c4ca2533-abfa-4bfc-923d-935dc50d2be8	0.545151	1.4413	1.98645	6.61837	0.769899	59.7068	3.24478	17.1381	20.3829	9.62041	1.11912
	e6e9236c2894b36ad7b180d77300cd3e1213c3c3691be48a743e096cbdd737d7	104	14.3493	15.9091	1.85067	1.66922	9.78183	5.72444	42.7636	2ba48860-9704-429d-b2f6-95a68104034f	0.542922	2.46016	3.00308	11.1035	1.29164	108.539	4.36402	10.3496	14.7136	13.1407	1.52862
	e6e9236c2894b36ad7b180d77300cd3e1213c3c3691be48a743e096cbdd737d7	105	9.24258	17.0183	1.97969	1.07517	9.90965	6.00369	111.491	8afe6846-cb32-4a35-87dc-910f7f473f0c	0.73122	1.43549	2.16671	15.3993	1.79136	892.831	183.981	43.7408	227.722	11.8861	1.38268
	e6e9236c2894b36ad7b180d77300cd3e1213c3c3691be48a743e096cbdd737d7	106	17.3491	10.2635	1.19393	2.01817	9.59519	3.63014	44.2909	4b998a9f-4a6c-4181-a8f9-0742405897c5	0.612578	0.446552	1.05913	8.96152	1.04247	40.7286	7.04869	13.8583	20.907	8.3032	0.965891
	e6e9236c2894b36ad7b180d77300cd3e1213c3c3691be48a743e096cbdd737d7	107	11.7846	9.15652	1.06515	1.37088	10.9961	6.28293	38.1818	b997d51d-05c0-4380-9f39-1deb2ee51ec2	0.627225	2.71739	3.34461	7.03937	0.818873	60.5598	8.41913	3.78621	12.2053	8.33811	0.969952
	e6e9236c2894b36ad7b180d77300cd3e1213c3c3691be48a743e096cbdd737d7	108	11.8399	9.84534	1.14528	1.37731	11.1982	4.18862	56.5091	0dcfb8c8-01f9-4856-8908-31d8e05d9732	0.790127	0.553945	1.34407	8.49627	0.98835	52.67	2.59885	22.9604	25.5593	11.0789	1.28878
	e6e9236c2894b36ad7b180d77300cd3e1213c3c3691be48a743e096cbdd737d7	109	3.82841	11.9871	1.39443	0.44535	11.153	5.30558	65.6727	20041b22-b7ce-4429-9cd9-38b2c6956acf	0.50043	0.64933	1.14976	9.85901	1.14687	95.3177	13.514	45.0922	58.6062	8.39737	0.976845
	e6e9236c2894b36ad7b180d77300cd3e1213c3c3691be48a743e096cbdd737d7	110	1.97074	11.3572	1.32116	0.229251	11.4509	5.30558	38.1818	9daf391b-4c25-4935-8f4c-634e47641657	0.985793	2.36511	3.3509	9.89785	1.15139	106.619	16.4719	5.11326	21.5852	11.4372	1.33046
	e6e9236c2894b36ad7b180d77300cd3e1213c3c3691be48a743e096cbdd737d7	111	20.5523	11.5593	1.34466	2.3908	11.6988	4.18862	39.7091	51c31f17-0c03-47e2-8b49-e553327d06f4	0.379431	0.694088	1.07352	11.2455	1.30816	49.8979	5.8215	7.78851	13.61	10.0551	1.16969
	e6e9236c2894b36ad7b180d77300cd3e1213c3c3691be48a743e096cbdd737d7	112	9.9407	10.0472	1.16876	1.15638	11.533	6.28293	61.0909	170c1257-828f-461a-a456-2a13dfaff1dc	0.572491	2.62416	3.19666	7.84382	0.912452	130.289	5.76641	28.2504	34.0168	7.61209	0.885496
	e6e9236c2894b36ad7b180d77300cd3e1213c3c3691be48a743e096cbdd737d7	113	9.47778	13.6526	1.58818	1.10253	9.26658	4.18862	33.6	7f655a0d-019e-47d5-addb-c34eb6f1d20f	1.1108	0.906751	2.01756	9.45877	1.10032	107.046	26.4109	2.92519	29.3361	13.2962	1.54672
	e6e9236c2894b36ad7b180d77300cd3e1213c3c3691be48a743e096cbdd737d7	114	24.81	16.8839	1.96407	2.88609	11.1967	7.95837	79.4182	854b9045-16a2-437e-a31a-163a40de4973	0.675899	2.46082	3.13672	13.5957	1.58155	368.477	15.6416	38.5434	54.185	14.0551	1.635
	e6e9236c2894b36ad7b180d77300cd3e1213c3c3691be48a743e096cbdd737d7	115	17.8482	12.7935	1.48823	2.07624	11.7046	3.90938	61.0909	ed394eda-78e3-4135-8e92-142d2e8cd690	0.793416	0.369053	1.16247	9.76313	1.13572	112.803	5.08997	8.79528	13.8852	9.80755	1.14089
	e6e9236c2894b36ad7b180d77300cd3e1213c3c3691be48a743e096cbdd737d7	116	13.5049	10.3954	1.20928	1.57099	9.98435	3.76976	44.2909	f4253173-e5b0-40e3-b44d-b2f40ecbbab5	1.01245	0.616824	1.62928	7.5406	0.877179	46.2728	6.29533	13.2188	19.5142	8.84632	1.02907
	e6e9236c2894b36ad7b180d77300cd3e1213c3c3691be48a743e096cbdd737d7	117	15.3053	9.74613	1.13374	1.78043	12.2327	4.049	35.1273	4dc87c66-5fd9-4f31-aa87-4296eff4dcae	0.698463	1.50417	2.20263	5.94066	0.691062	15.14	2.58993	3.96077	6.5507	9.69329	1.1276
	e6e9236c2894b36ad7b180d77300cd3e1213c3c3691be48a743e096cbdd737d7	118	16.8402	8.80513	1.02428	1.95898	9.99389	4.60748	39.7091	16add49e-c67a-49d1-8551-1485711593bb	0.317265	1.23129	1.54856	6.14832	0.715219	22.8165	4.38208	7.82242	12.2045	6.68324	0.777445
	e6e9236c2894b36ad7b180d77300cd3e1213c3c3691be48a743e096cbdd737d7	119	15.0113	11.1057	1.2919	1.74623	12.7154	4.7471	56.5091	d93401f8-b96f-46db-899e-93205533ae2b	0.752817	1.46643	2.21924	6.31197	0.734256	61.626	3.8325	20.7862	24.6187	8.62749	1.00361
	e6e9236c2894b36ad7b180d77300cd3e1213c3c3691be48a743e096cbdd737d7	120	19.1467	7.74282	0.900703	2.22729	10.485	6.42255	45.8182	8851541d-5162-4a08-acaa-3f28141e2fd6	1.13542	2.66974	3.80516	5.37268	0.62499	71.2217	4.4268	17.0277	21.4545	7.36829	0.857135
	e6e9236c2894b36ad7b180d77300cd3e1213c3c3691be48a743e096cbdd737d7	121	17.8988	9.62128	1.11922	2.08212	10.6835	4.18862	38.1818	080fafd5-9b36-44fe-90c1-0210657e7d5f	2.28163	1.43025	3.71188	7.5871	0.882588	58.6407	4.20426	13.4121	17.6164	10.5808	1.23084
	e6e9236c2894b36ad7b180d77300cd3e1213c3c3691be48a743e096cbdd737d7	122	16.1647	11.9897	1.39473	1.8804	10.4681	4.7471	64.1455	457c2329-e2ab-4a81-8be0-cfa85448d431	0.877498	2.8765	3.754	5.99313	0.697166	89.9867	6.96005	23.888	30.848	6.80961	0.792145
	0a1046659922bfb9e95343369b3e1b93bdfd8ad588558b753266aca5f7e54783	1	26.2446	18.7885	1.10094	1.53783	18.5942	4.31749	35.1273	6faea0e2-b228-4ad6-ae5a-77bf1e73fc6b	0.505318	0.842388	1.34771	17.4224	1.02088	65.2805	8.90205	4.51902	13.4211	16.8684	0.988426
	0a1046659922bfb9e95343369b3e1b93bdfd8ad588558b753266aca5f7e54783	2	12.767	17.4884	1.02476	0.748095	18.1493	4.17358	38.1818	a086bd26-64e3-4913-a51a-550e5b08af12	1.33729	0.892883	2.23017	12.9327	0.757806	32.0907	3.63016	5.72825	9.35841	17.0772	1.00066
	0a1046659922bfb9e95343369b3e1b93bdfd8ad588558b753266aca5f7e54783	3	9.78923	12.7628	0.747853	0.573611	16.6088	4.60532	47.3455	b52c89be-ce1f-4194-8769-61c1a8c8aca1	0.741151	1.09175	1.8329	10.0976	0.591682	32.5303	5.24156	11.7351	16.9766	11.282	0.661085
	0a1046659922bfb9e95343369b3e1b93bdfd8ad588558b753266aca5f7e54783	4	6.60858	15.9262	0.933217	0.387237	18.463	4.46141	35.1273	db9b011c-2ca3-4c92-a7d7-4c66a05ab7af	0.480311	0.858969	1.33928	15.4521	0.905434	20.0018	3.18604	3.64186	6.8279	17.9858	1.0539
	0a1046659922bfb9e95343369b3e1b93bdfd8ad588558b753266aca5f7e54783	5	-0.593365	16.6109	0.973337	-0.0347689	18.1912	5.18099	47.3455	6659983a-6d89-4943-89b3-58f95c77e0cd	0.936779	1.29618	2.23296	12.0464	0.705875	54.9499	12.2856	5.88216	18.1678	13.5798	0.795722
	0a1046659922bfb9e95343369b3e1b93bdfd8ad588558b753266aca5f7e54783	6	45.1337	24.4285	1.43141	2.64466	18.0271	4.89316	38.1818	47876027-adc5-4381-8eeb-2287613e1698	0.432583	1.42383	1.85641	20.216	1.18458	35.3877	3.71493	5.08573	8.80066	23.5329	1.37894
	0a1046659922bfb9e95343369b3e1b93bdfd8ad588558b753266aca5f7e54783	7	22.8919	21.8298	1.27914	1.34138	16.2996	4.17358	35.1273	2016a479-f5f0-4a9b-afa2-86277dd269f5	1.26459	0.8202	2.08479	15.0031	0.879122	78.9081	20.3859	3.43625	23.8222	19.2185	1.12613
	0a1046659922bfb9e95343369b3e1b93bdfd8ad588558b753266aca5f7e54783	8	36.6303	29.7371	1.74248	2.1464	13.7064	5.61274	42.7636	79783a75-7c54-44a3-bd7b-a49062313817	1.37209	0.821809	2.1939	23.7042	1.38897	306.401	32.0506	4.95096	37.0016	25.2718	1.48083
	0a1046659922bfb9e95343369b3e1b93bdfd8ad588558b753266aca5f7e54783	9	12.4788	13.7917	0.80814	0.731211	17.3778	4.17358	38.1818	ad9b2e55-6ce0-4f41-af0c-d8e2960f5594	1.42704	0.534888	1.96192	11.791	0.690909	56.9281	16.76	8.53017	25.2902	10.4552	0.612638
	0a1046659922bfb9e95343369b3e1b93bdfd8ad588558b753266aca5f7e54783	10	4.40059	10.31	0.604128	0.257858	14.7952	4.74924	50.4	2789c28a-945b-4f39-9bc8-9b9a37a4e4cd	0.456687	0.669988	1.12667	10.0356	0.588045	78.2487	7.05601	6.71773	13.7737	9.52954	0.558394
	0a1046659922bfb9e95343369b3e1b93bdfd8ad588558b753266aca5f7e54783	11	27.9141	13.3715	0.783517	1.63566	17.4085	7.9154	47.3455	27c32cdd-2ffa-4842-abb7-d233eccf2c47	0.755482	1.18376	1.93924	10.1538	0.594974	251.451	75.7262	6.76162	82.4878	11.2112	0.656931
	0a1046659922bfb9e95343369b3e1b93bdfd8ad588558b753266aca5f7e54783	12	20.3713	13.0705	0.765883	1.19368	16.7832	6.76407	36.6545	47441882-e796-498c-850a-3288530d273d	0.390292	1.75852	2.14881	9.87739	0.578777	77.1497	17.0781	34.24	51.3182	8.65974	0.507427
	0a1046659922bfb9e95343369b3e1b93bdfd8ad588558b753266aca5f7e54783	13	15.6382	13.0938	0.767248	0.916339	17.5812	3.59791	39.7091	05700753-ad79-47c7-985e-1f7f378632fd	0.297821	0.672478	0.970299	8.17852	0.47923	12.5286	2.85583	6.78604	9.64187	11.2285	0.65795
	0a1046659922bfb9e95343369b3e1b93bdfd8ad588558b753266aca5f7e54783	14	10.1063	12.0345	0.705173	0.59219	17.7318	4.74924	36.6545	64ad956f-6379-42f7-97ad-49a29a2dc931	0.724274	0.652305	1.37658	10.617	0.622116	33.8491	3.95348	3.26081	7.21429	13.8232	0.809987
	0a1046659922bfb9e95343369b3e1b93bdfd8ad588558b753266aca5f7e54783	15	29.929	12.4595	0.730076	1.75373	13.3448	5.03707	41.2364	5a6e6e24-2022-4ba8-8ffd-364a23529dd5	0.852868	1.89213	2.74499	11.2135	0.657068	73.8527	4.69299	5.59792	10.2909	12.4506	0.729555
	0a1046659922bfb9e95343369b3e1b93bdfd8ad588558b753266aca5f7e54783	16	13.8074	10.6321	0.623001	0.809059	14.1991	3.45399	42.7636	6c1d49a5-a469-415d-8109-f65d3e2c6223	0.654277	0.50889	1.16317	7.58782	0.444617	23.2988	2.62298	10.8738	13.4967	9.91719	0.581109
	0a1046659922bfb9e95343369b3e1b93bdfd8ad588558b753266aca5f7e54783	17	18.859	17.8098	1.04358	1.10506	19.1911	4.46141	35.1273	3c91e513-7420-40fd-9507-af540d354675	0.418942	0.432562	0.851505	15.7945	0.925499	59.3459	19.5132	4.05815	23.5713	14.6398	0.857836
	0a1046659922bfb9e95343369b3e1b93bdfd8ad588558b753266aca5f7e54783	18	46.2466	17.4616	1.02318	2.70987	19.3383	3.88574	36.6545	0809e78f-7e11-4a9f-9027-bc7c8b26b8e1	0.513393	0.936328	1.44972	13.0852	0.766741	45.0589	13.4102	4.17724	17.5874	16.2691	0.953305
	0a1046659922bfb9e95343369b3e1b93bdfd8ad588558b753266aca5f7e54783	19	10.7657	12.1894	0.714252	0.630828	18.3019	4.02966	45.8182	0af8d66c-d5cf-473a-8fd1-b14c0f5160fb	0.516896	0.945304	1.4622	8.87725	0.520173	25.4968	13.291	16.4057	29.6967	10.4488	0.612258
	0a1046659922bfb9e95343369b3e1b93bdfd8ad588558b753266aca5f7e54783	20	28.2182	22.4811	1.31731	1.65348	16.5639	5.03707	50.4	ce4b5f0c-3268-4f62-a0d2-23137c35969e	0.44742	0.791181	1.2386	18.3995	1.07814	126.385	12.3224	18.4911	30.8134	16.2514	0.952271
	0a1046659922bfb9e95343369b3e1b93bdfd8ad588558b753266aca5f7e54783	21	34.833	26.8864	1.57544	2.04108	20.0533	5.32491	50.4	0e08e95d-02ea-426f-a57a-909624cff770	1.16696	0.89867	2.06563	22.2312	1.30266	257.605	8.52337	9.35614	17.8795	24.7746	1.4517
	0a1046659922bfb9e95343369b3e1b93bdfd8ad588558b753266aca5f7e54783	22	18.1507	10.426	0.610922	1.06356	15.1711	3.59791	45.8182	8d2df3de-5be9-477a-bf1a-e129cd768f62	2.20938	0.603789	2.81317	6.91682	0.405299	36.4867	23.1822	14.2775	37.4598	7.15468	0.419237
	0a1046659922bfb9e95343369b3e1b93bdfd8ad588558b753266aca5f7e54783	23	25.9804	16.6903	0.97799	1.52235	18.2287	4.17358	108.436	1cbc1258-e0c7-4e9a-a978-851ea09f587b	1.81889	0.386531	2.20542	8.88886	0.520853	219.8	24.4761	12.8244	37.3005	9.3317	0.546802
	0a1046659922bfb9e95343369b3e1b93bdfd8ad588558b753266aca5f7e54783	24	29.1142	12.4422	0.729063	1.70598	18.0336	4.02966	58.0364	2cc5c652-242f-4373-a456-a5a022c512c4	0.469011	0.386943	0.855954	8.82809	0.517292	34.2887	19.3564	53.4354	72.7918	7.35044	0.430708
	0a1046659922bfb9e95343369b3e1b93bdfd8ad588558b753266aca5f7e54783	25	13.634	13.0878	0.766897	0.798899	18.1599	3.74183	35.1273	290baf43-b6f8-4477-877c-40fbc6004332	0.969705	0.4749	1.44461	13.2169	0.774458	35.6075	8.31937	5.04084	13.3602	13.4993	0.791009
	0a1046659922bfb9e95343369b3e1b93bdfd8ad588558b753266aca5f7e54783	26	9.99895	12.7867	0.749251	0.5859	16.781	3.74183	42.7636	d6364365-9ef3-4071-9f65-a15cd7e443e8	0.645912	0.566536	1.21245	12.0963	0.708798	23.2988	3.13211	4.37778	7.50988	14.3703	0.842043
	0a1046659922bfb9e95343369b3e1b93bdfd8ad588558b753266aca5f7e54783	27	-7.91552	14.7262	0.862901	-0.463819	18.4635	3.74183	36.6545	45fcab96-140c-4307-8a35-ac34cfc40216	0.575085	0.651203	1.22629	16.4874	0.9661	21.98	7.40222	4.0544	11.4566	16.6983	0.978457
	0a1046659922bfb9e95343369b3e1b93bdfd8ad588558b753266aca5f7e54783	28	26.4642	13.2595	0.776956	1.5507	17.2376	4.74924	36.6545	e960a47b-93e6-4dcc-b1af-376dfda289ad	0.617362	0.835185	1.45255	11.6242	0.681135	23.2988	2.6142	3.58746	6.20166	16.8277	0.986038
	0a1046659922bfb9e95343369b3e1b93bdfd8ad588558b753266aca5f7e54783	29	12.5313	11.331	0.663955	0.734287	17.2225	3.74183	35.1273	41e6f8bf-6a92-47f9-82da-5463e3a4ad96	0.488127	0.668316	1.15644	8.49723	0.497905	12.7484	4.03637	3.17135	7.20772	9.69586	0.56814
	0a1046659922bfb9e95343369b3e1b93bdfd8ad588558b753266aca5f7e54783	30	19.0221	13.8349	0.810672	1.11462	19.268	3.88574	36.6545	e90a2a6e-505a-4011-a405-7cb54963602b	0.51446	0.543594	1.05805	12.7365	0.74631	25.277	5.89952	5.27679	11.1763	13.8315	0.810472
	0a1046659922bfb9e95343369b3e1b93bdfd8ad588558b753266aca5f7e54783	31	35.8102	13.3353	0.781397	2.09834	20.7683	4.02966	39.7091	bc4719a3-33a4-4349-8780-60df6cbc7701	1.48312	1.12123	2.60434	9.16158	0.536834	69.2369	16.9114	10.0771	26.9885	10.6369	0.623279
	0a1046659922bfb9e95343369b3e1b93bdfd8ad588558b753266aca5f7e54783	32	19.4355	24.5048	1.43589	1.13885	20.9331	6.18841	44.2909	c7bfb5f8-03f9-4978-bf40-1c815450bf6a	0.590419	0.9255	1.51592	23.9806	1.40517	596.536	336.104	12.58	348.684	17.7243	1.03857
	0a1046659922bfb9e95343369b3e1b93bdfd8ad588558b753266aca5f7e54783	33	24.115	12.7759	0.748619	1.41305	22.3678	3.45399	38.1818	2300d972-65ae-4356-8009-d9b8a7ca45d3	0.41095	0.366588	0.777538	13.9044	0.814745	12.5286	4.59032	5.11973	9.71005	13.2178	0.774511
	0a1046659922bfb9e95343369b3e1b93bdfd8ad588558b753266aca5f7e54783	34	25.1929	21.1052	1.23669	1.47621	20.9714	6.33232	42.7636	4157f456-2502-4a6b-a1dd-fa8ac8094504	0.555767	1.36828	1.92405	17.2997	1.0137	618.956	219.143	10.0321	229.175	14.7874	0.866487
	0a1046659922bfb9e95343369b3e1b93bdfd8ad588558b753266aca5f7e54783	35	19.8878	14.2921	0.837464	1.16535	22.0204	4.89316	59.5636	45b82649-1850-4efd-b0ca-b2ca1111a96c	0.944129	1.61462	2.55875	11.273	0.660553	85.7218	16.5638	18.3469	34.9107	10.6882	0.62629
	0a1046659922bfb9e95343369b3e1b93bdfd8ad588558b753266aca5f7e54783	36	27.9226	16.9102	0.990871	1.63616	16.5579	5.32491	183.273	ae86b385-3765-4256-9cb8-a3874aedeeaf	1.4922	1.56157	3.05377	10.4694	0.613465	234.306	34.1595	142.402	176.562	8.82583	0.51716
	0a1046659922bfb9e95343369b3e1b93bdfd8ad588558b753266aca5f7e54783	37	15.8713	13.467	0.789114	0.929996	18.9704	5.03707	33.6	150d1ab4-fd88-4221-8fbe-bba0cc9814dd	0.289056	1.439	1.72805	7.89339	0.462523	38.0253	19.7029	2.68171	22.3846	10.5794	0.619909
	19fb6a38a22b3ad556bad2567645240b9fbd37951a3b45dd103833a2b2f9a389	1	5.48416	4.861	1.41808	1.59987	3.84699	3.90625	42.7636	5c5944c5-25b8-4449-9a20-e3c358c6b98a	0.491074	0.648575	1.13965	4.34918	1.26877	25.9943	2.57971	9.19613	11.7758	4.86183	1.41832
	19fb6a38a22b3ad556bad2567645240b9fbd37951a3b45dd103833a2b2f9a389	2	3.67866	6.61416	1.92952	1.07316	3.79352	4.04576	84	ddbb1d6b-49e6-4da1-97bb-89feaea79f6d	0.856889	0.884598	1.74149	4.95347	1.44505	150.639	2.60599	25.4548	28.0608	5.58556	1.62945
	19fb6a38a22b3ad556bad2567645240b9fbd37951a3b45dd103833a2b2f9a389	3	5.65414	4.60247	1.34266	1.64946	3.86223	4.7433	56.5091	d0b0f83d-b536-45f3-86fa-7038a6ddc9f4	1.56478	1.21314	2.77792	3.277	0.955984	84.5881	17.4402	32.2457	49.6859	3.72184	1.08576
	19fb6a38a22b3ad556bad2567645240b9fbd37951a3b45dd103833a2b2f9a389	4	7.6787	4.91121	1.43273	2.24008	2.84013	3.62723	39.7091	a20c05da-6124-45a7-a909-66ac31b73f9b	1.02056	0.530777	1.55133	4.19711	1.22441	24.2898	16.2688	8.32751	24.5963	4.42828	1.29185
	19fb6a38a22b3ad556bad2567645240b9fbd37951a3b45dd103833a2b2f9a389	5	17.4853	5.41759	1.58045	5.10091	3.95771	3.62723	38.1818	fb252709-872c-4076-b28f-acba2484fdd5	0.410722	0.398662	0.809383	5.59092	1.63102	11.9318	2.14149	4.82235	6.96384	6.46261	1.88531
	19fb6a38a22b3ad556bad2567645240b9fbd37951a3b45dd103833a2b2f9a389	6	14.077	5.50823	1.60689	4.10663	3.32784	4.32478	38.1818	2414ac4b-c0e2-4904-bd89-abce96e28ea5	0.385778	0.526943	0.912721	5.10603	1.48956	15.1278	3.44294	3.75899	7.20193	5.77676	1.68523
	19fb6a38a22b3ad556bad2567645240b9fbd37951a3b45dd103833a2b2f9a389	7	7.8667	5.91085	1.72435	2.29492	3.62109	3.76674	42.7636	e80d48e2-4c72-411a-a25d-d6a9257d53a7	0.743562	0.987729	1.73129	3.24141	0.945603	25.9943	2.46395	4.64365	7.1076	5.41655	1.58015
	19fb6a38a22b3ad556bad2567645240b9fbd37951a3b45dd103833a2b2f9a389	8	2.97154	5.4359	1.58579	0.866874	4.26928	4.7433	42.7636	c07747e5-0ace-4de7-8a37-4dd3ada0bcd9	2.09568	0.923771	3.01945	4.3813	1.27814	41.9744	17.0558	7.41718	24.4729	5.31977	1.55192
	cc023c28e5d05e9eece500b92ed0243b74cc5d96ea56cba472bc04149d7c0911	1	16.388	12.4179	0.9951	1.31324	10.1864	4.8185	35.1273	a67cddc3-2a7e-440f-ac37-e00b037699ed	0.779114	0.573206	1.35232	12.1212	0.971328	76.6218	11.2633	4.68677	15.9501	12.1839	0.976351
	cc023c28e5d05e9eece500b92ed0243b74cc5d96ea56cba472bc04149d7c0911	2	6.63529	11.1738	0.895404	0.531716	10.8108	5.5271	35.1273	056b7e44-09be-4c4d-8455-742ac74ac150	1.09122	0.726401	1.81763	9.0745	0.727181	54.3279	10.9733	3.19139	14.1647	10.4531	0.837655
	cc023c28e5d05e9eece500b92ed0243b74cc5d96ea56cba472bc04149d7c0911	3	11.5654	13.9787	1.12018	0.926785	9.81611	5.24366	41.2364	588ebc92-40c6-4e99-a0b9-342599497db8	1.01361	1.37739	2.39101	12.5526	1.00589	133.547	6.48677	5.078	11.5648	14.7153	1.17921
	cc023c28e5d05e9eece500b92ed0243b74cc5d96ea56cba472bc04149d7c0911	4	5.19391	7.9349	0.635859	0.416211	8.63824	4.25161	45.8182	2178e3da-cfe1-429e-bcad-0c3b7954f742	0.453742	0.840059	1.2938	5.52585	0.442811	28.5708	2.30562	13.2777	15.5833	7.07116	0.566644
	cc023c28e5d05e9eece500b92ed0243b74cc5d96ea56cba472bc04149d7c0911	5	6.85229	8.86695	0.710548	0.549104	10.1485	4.67677	33.6	449dc662-3f58-4e60-922e-1644b1120391	0.56333	0.695761	1.25909	8.27896	0.66343	46.3194	5.94541	3.59962	9.54503	10.0483	0.805211
	cc023c28e5d05e9eece500b92ed0243b74cc5d96ea56cba472bc04149d7c0911	6	9.97323	11.5969	0.929309	0.799199	9.58682	4.96022	36.6545	797730fc-0e2c-47b8-9b34-1ddd8e95b0fd	0.350925	0.965461	1.31639	12.8659	1.031	43.5056	5.03808	4.09145	9.12953	12.9557	1.0382
	cc023c28e5d05e9eece500b92ed0243b74cc5d96ea56cba472bc04149d7c0911	7	1.20632	10.2034	0.817646	0.0966679	9.97277	4.53505	42.7636	7b98200a-2d02-49fc-b451-c2f3071e9b27	1.36861	0.651746	2.02035	8.16165	0.654029	56.4923	7.82319	9.91533	17.7385	7.74217	0.620415
	cc023c28e5d05e9eece500b92ed0243b74cc5d96ea56cba472bc04149d7c0911	8	8.41211	7.77362	0.622935	0.6741	10.5721	5.5271	45.8182	75da0a9b-48a7-46b2-94dc-172b4c517cab	0.661032	2.19711	2.85814	6.92434	0.554878	48.7003	3.09425	10.2143	13.3085	8.04351	0.644562
	cc023c28e5d05e9eece500b92ed0243b74cc5d96ea56cba472bc04149d7c0911	9	12.6019	10.4863	0.840315	1.00984	10.1232	6.51914	45.8182	23c615ba-06db-4790-89c6-453dd4723e63	1.20178	3.26592	4.4677	6.71463	0.538073	96.7513	4.81067	13.3734	18.1841	8.27984	0.663501
	cc023c28e5d05e9eece500b92ed0243b74cc5d96ea56cba472bc04149d7c0911	10	21.6017	18.7959	1.5062	1.73104	12.6656	5.81054	54.9818	6d1b275e-bc85-4920-bfc8-f40ac6fc5ae0	0.675063	1.15571	1.83077	15.7504	1.26215	206.489	6.9508	22.4864	29.4372	15.9834	1.28082
	cc023c28e5d05e9eece500b92ed0243b74cc5d96ea56cba472bc04149d7c0911	11	18.1279	15.7531	1.26237	1.45267	10.8902	6.2357	59.5636	6079bebf-f489-4b9e-8fa0-21e6b9aaff06	0.689329	0.733396	1.42272	13.2529	1.06201	316.227	12.2069	23.4508	35.6576	11.1667	0.894841
	cc023c28e5d05e9eece500b92ed0243b74cc5d96ea56cba472bc04149d7c0911	12	8.92008	8.79526	0.704804	0.714806	11.3981	7.22774	35.1273	e6f9c8ac-f85e-42c7-bbd3-f73d15931c3f	0.710317	1.99568	2.706	6.90468	0.553303	87.6605	14.2479	4.42169	18.6696	7.91957	0.63463
	cc023c28e5d05e9eece500b92ed0243b74cc5d96ea56cba472bc04149d7c0911	13	9.06917	9.79157	0.784643	0.726753	11.843	4.53505	36.6545	700c57ea-3f7a-4b0b-b54f-f9324359cfee	1.21028	1.15319	2.36347	6.84466	0.548494	56.0595	19.1145	6.88638	26.0008	7.52386	0.602921
	cc023c28e5d05e9eece500b92ed0243b74cc5d96ea56cba472bc04149d7c0911	14	5.39313	8.91836	0.714668	0.432175	12.119	4.67677	33.6	6dbe1f5e-615e-4165-9490-1879d60425ae	0.363418	0.492962	0.856379	8.42291	0.674966	39.3931	21.648	3.18031	24.8283	7.46131	0.597908
	cc023c28e5d05e9eece500b92ed0243b74cc5d96ea56cba472bc04149d7c0911	15	9.14152	8.80527	0.705606	0.732551	10.7313	4.53505	42.7636	ff7e3442-e478-468d-ac57-f74115f1a8cd	0.740168	1.60441	2.34458	7.35449	0.589349	79.0027	28.2232	11.0987	39.3219	6.86754	0.550327
	cc023c28e5d05e9eece500b92ed0243b74cc5d96ea56cba472bc04149d7c0911	16	9.31948	6.80422	0.545253	0.746812	10.7165	4.53505	53.4545	f9216d49-5ce4-40bc-abe2-8319ca888e17	0.327926	2.52387	2.8518	4.67712	0.374798	26.6228	3.1896	40.2311	43.4207	5.05413	0.40501
	cc023c28e5d05e9eece500b92ed0243b74cc5d96ea56cba472bc04149d7c0911	17	9.92892	8.51334	0.682212	0.795649	10.7819	4.25161	70.2545	d51c9b60-48d8-47d0-bda7-787be44d873f	1.63909	0.547889	2.18698	6.28155	0.503369	82.0329	14.8516	8.60527	23.4569	6.75711	0.541477
	cc023c28e5d05e9eece500b92ed0243b74cc5d96ea56cba472bc04149d7c0911	18	11.2669	9.12052	0.730868	0.902865	10.8169	4.53505	35.1273	3b69e494-2d61-4fe4-9c82-ad05bdc52ecd	0.474337	1.45898	1.93332	5.73516	0.459584	39.3931	6.0149	3.64635	9.66125	8.24417	0.660642
	cc023c28e5d05e9eece500b92ed0243b74cc5d96ea56cba472bc04149d7c0911	19	1.24616	9.22783	0.739467	0.0998603	10.9068	3.82645	42.7636	10642e0b-17d2-4b0b-b8f6-e029e42d37c7	0.682355	0.524746	1.2071	9.65184	0.773445	30.9517	3.70477	3.90563	7.6104	11.5206	0.923194
	cc023c28e5d05e9eece500b92ed0243b74cc5d96ea56cba472bc04149d7c0911	20	8.97846	8.2898	0.664299	0.719484	12.1343	5.10194	44.2909	a48f86bc-6fc6-4566-9554-b8e0cd0f595f	3.27284	1.47356	4.7464	5.14673	0.412431	65.7995	3.9665	7.27699	11.2435	7.93237	0.635656
	cc023c28e5d05e9eece500b92ed0243b74cc5d96ea56cba472bc04149d7c0911	21	1.00895	9.16384	0.734339	0.0808513	11.0532	3.68473	42.7636	f2ea1037-4145-4313-bb2a-2043758ba0b5	0.306464	0.870334	1.1768	6.60523	0.529307	13.8525	2.91555	5.83702	8.75257	8.19031	0.656326
	cc023c28e5d05e9eece500b92ed0243b74cc5d96ea56cba472bc04149d7c0911	22	12.554	8.68053	0.69561	1.006	11.8643	4.96022	35.1273	9daf9953-1959-4062-a909-8f3899f994b9	0.398805	1.55038	1.94919	6.51107	0.521761	60.1719	21.6464	3.77398	25.4204	6.34565	0.508505
	cc023c28e5d05e9eece500b92ed0243b74cc5d96ea56cba472bc04149d7c0911	23	5.24152	8.17234	0.654886	0.420026	11.0272	3.68473	45.8182	7643415a-d07d-4972-922f-5c641f2157ef	0.630077	0.88433	1.51441	7.46046	0.59784	53.2457	5.12004	38.9869	44.107	7.26562	0.582227
	cc023c28e5d05e9eece500b92ed0243b74cc5d96ea56cba472bc04149d7c0911	24	0.998477	8.26594	0.662387	0.0800124	11.8058	3.82645	39.7091	f0fa19f7-e9ce-4873-bf88-3720463a7e32	0.536792	0.495564	1.03236	7.20213	0.577139	15.8005	6.20076	9.79063	15.9914	5.75051	0.460814
	cc023c28e5d05e9eece500b92ed0243b74cc5d96ea56cba472bc04149d7c0911	25	11.768	9.57066	0.76694	0.943021	12.5403	4.96022	38.1818	03b508a1-cf0d-47d4-8b61-61c16ec2d4b1	1.03821	1.36517	2.40338	7.25954	0.58174	49.7825	3.74548	4.48058	8.22605	9.75918	0.782047
	cc023c28e5d05e9eece500b92ed0243b74cc5d96ea56cba472bc04149d7c0911	26	8.02866	9.60816	0.769945	0.643373	12.6309	4.39333	45.8182	a99caf1b-1f27-4837-b2b0-c55e13b3d47a	2.76816	1.07632	3.84448	6.23043	0.499272	53.895	3.97971	4.62683	8.60653	8.17109	0.654786
	cc023c28e5d05e9eece500b92ed0243b74cc5d96ea56cba472bc04149d7c0911	27	13.7821	11.576	0.927635	1.10442	12.6353	4.53505	35.1273	8ba45d9c-819a-4578-aeff-1006bcaf57d4	0.437047	1.21239	1.64944	10.2486	0.821268	41.9905	12.9464	4.34384	17.2903	10.3142	0.826521
	cc023c28e5d05e9eece500b92ed0243b74cc5d96ea56cba472bc04149d7c0911	28	8.98307	7.37048	0.59063	0.719854	13.0373	4.8185	41.2364	6ee16584-4584-434d-a245-827f7e761c31	0.780957	0.790637	1.57159	7.40784	0.593623	38.9602	15.647	9.89632	25.5433	7.31611	0.586272
	cc023c28e5d05e9eece500b92ed0243b74cc5d96ea56cba472bc04149d7c0911	29	23.5743	16.408	1.31484	1.88911	12.7091	5.66882	99.2727	6121be39-7bda-4e0e-87bb-fc784b676271	0.934068	0.636999	1.57107	17.6676	1.41578	344.365	24.928	12.0937	37.0217	15.3872	1.23305
	cc023c28e5d05e9eece500b92ed0243b74cc5d96ea56cba472bc04149d7c0911	30	15.1793	8.65027	0.693185	1.21638	13.6226	3.40129	36.6545	816d816c-9689-49f7-9752-64106d3cccb6	0.322037	0.382273	0.70431	8.84042	0.708423	8.87428	2.78728	4.20965	6.99693	9.18932	0.736382
	cc023c28e5d05e9eece500b92ed0243b74cc5d96ea56cba472bc04149d7c0911	31	9.34764	11.1786	0.895787	0.749069	12.6591	4.67677	36.6545	d84b3a16-5973-4e23-a6ec-3c1acb0c04be	0.433663	0.716737	1.1504	13.2699	1.06338	68.1804	20.2521	4.44721	24.6994	14.1005	1.12994
	cc023c28e5d05e9eece500b92ed0243b74cc5d96ea56cba472bc04149d7c0911	32	25.1566	11.8594	0.950349	2.01591	12.7361	5.95226	53.4545	1e8da85a-3a2f-44d5-9bf6-011f3788a62c	3.20398	1.30805	4.51203	9.01375	0.722312	187.226	12.5207	4.89519	17.4159	11.3534	0.909802
	cc023c28e5d05e9eece500b92ed0243b74cc5d96ea56cba472bc04149d7c0911	33	32.5177	12.1626	0.97464	2.60579	13.9118	4.67677	73.3091	fd55a1ee-9dc7-413a-98f4-5266b3521aca	1.54191	0.495631	2.03754	10.0921	0.808723	152.594	3.08145	12.1202	15.2017	11.4084	0.914203
	cc023c28e5d05e9eece500b92ed0243b74cc5d96ea56cba472bc04149d7c0911	34	12.8761	11.976	0.95969	1.03182	13.4755	3.68473	35.1273	f5e2d295-83cf-4a7f-9c90-51d8a0f3f7ae	0.395155	0.745811	1.14097	9.69904	0.777227	25.1077	3.54756	3.38307	6.93063	12.2085	0.978318
	cc023c28e5d05e9eece500b92ed0243b74cc5d96ea56cba472bc04149d7c0911	35	15.0151	8.00241	0.641269	1.20323	13.4565	4.39333	39.7091	182e0dfc-5649-4c9d-8647-38a097cdae19	0.317092	1.74415	2.06124	6.37322	0.510715	22.5104	32.4721	7.06048	39.5326	5.90442	0.473147
	cc023c28e5d05e9eece500b92ed0243b74cc5d96ea56cba472bc04149d7c0911	36	7.37132	8.81398	0.706303	0.590697	13.3847	3.82645	33.6	5a0987cf-2d0b-430b-8340-ccde77c7524f	1.01775	0.884302	1.90205	6.60488	0.529279	40.4754	4.18503	3.4453	7.63033	10.5842	0.848157
	cc023c28e5d05e9eece500b92ed0243b74cc5d96ea56cba472bc04149d7c0911	37	21.094	11.4094	0.914285	1.69036	13.9215	3.96817	48.8727	b460d31b-dcb5-45fd-abb1-345891abf943	0.712809	0.702431	1.41524	9.25683	0.741791	90.9072	37.3185	17.585	54.9035	8.61092	0.690031
	cc023c28e5d05e9eece500b92ed0243b74cc5d96ea56cba472bc04149d7c0911	38	2.73479	9.19542	0.73687	0.219151	13.933	5.81054	42.7636	abf1707a-1d41-425f-971c-791341cb2b47	0.518166	1.53995	2.05812	7.31104	0.585866	50.4319	11.1329	8.21302	19.346	8.61279	0.690181
	cc023c28e5d05e9eece500b92ed0243b74cc5d96ea56cba472bc04149d7c0911	39	11.5672	8.58374	0.687854	0.926935	11.7694	3.40129	35.1273	c27cbd14-4f75-4cdb-91e1-492e5e5e1eff	0.649935	0.371473	1.02141	7.88308	0.631706	19.2637	3.58835	3.33366	6.92201	10.0234	0.803218
	cc023c28e5d05e9eece500b92ed0243b74cc5d96ea56cba472bc04149d7c0911	40	16.4558	9.51376	0.76238	1.31868	15.2111	3.40129	36.6545	c2d28f87-9751-4352-a474-17bf30118b5b	0.836101	0.488111	1.32421	7.18641	0.575879	11.6881	2.52784	4.47931	7.00715	11.2888	0.904621
	cc023c28e5d05e9eece500b92ed0243b74cc5d96ea56cba472bc04149d7c0911	41	8.33837	9.02778	0.723436	0.668191	13.5958	3.54301	47.3455	8e9d7aa7-8029-42af-925d-cc906cc8dee4	0.928557	0.96152	1.89008	4.91651	0.393982	22.2939	2.36812	5.9319	8.30002	8.24539	0.66074
	cc023c28e5d05e9eece500b92ed0243b74cc5d96ea56cba472bc04149d7c0911	42	13.0424	7.79154	0.624371	1.04514	14.4865	3.68473	42.7636	aeda81a8-e4a1-44b7-b0c9-58c33e0aa0a9	1.66733	0.533892	2.20122	5.43861	0.43582	40.2589	3.29088	11.896	15.1869	6.44093	0.51614
	cc023c28e5d05e9eece500b92ed0243b74cc5d96ea56cba472bc04149d7c0911	43	8.88457	9.34166	0.748589	0.711961	14.386	3.68473	36.6545	351912d5-0e5f-46c1-9de2-89929ff781d0	0.496745	0.507655	1.0044	6.12989	0.491215	9.74006	2.22878	3.91911	6.14789	7.90155	0.633187
	cc023c28e5d05e9eece500b92ed0243b74cc5d96ea56cba472bc04149d7c0911	44	19.4452	12.0953	0.969254	1.55823	13.5452	4.96022	51.9273	c8034802-0252-4798-be46-c983e49b824e	0.926549	1.81359	2.74014	10.6068	0.849969	151.296	6.51701	17.3575	23.8745	12.3847	0.99244
	cc023c28e5d05e9eece500b92ed0243b74cc5d96ea56cba472bc04149d7c0911	45	10.8123	9.66693	0.774654	0.866437	13.4112	5.66882	53.4545	7962ca14-73ea-432b-935b-4af965942c16	0.356766	2.09073	2.4475	5.65933	0.453508	61.2542	4.55076	13.3529	17.9037	6.44708	0.516633
	cc023c28e5d05e9eece500b92ed0243b74cc5d96ea56cba472bc04149d7c0911	46	14.3057	10.2339	0.82009	1.14638	14.5255	6.66086	48.8727	4ff39cc7-9dcb-4e53-8202-919d3a9fd18a	0.365204	2.65509	3.02029	7.42969	0.595374	66.016	2.96023	7.52077	10.481	10.2155	0.818614
	cc023c28e5d05e9eece500b92ed0243b74cc5d96ea56cba472bc04149d7c0911	47	20.871	9.01195	0.722168	1.67248	15.525	3.96817	51.9273	66f2a579-068b-4a6a-9a5b-a2608c7b7a77	0.363673	0.954277	1.31795	6.76064	0.541761	23.809	2.60478	5.91203	8.51681	7.00046	0.560978
	cc023c28e5d05e9eece500b92ed0243b74cc5d96ea56cba472bc04149d7c0911	48	2.36669	9.04522	0.724834	0.189653	14.9255	5.24366	36.6545	01893dbd-6ca7-4de4-a2ec-ea9ca9b26a33	0.334348	2.33933	2.67368	6.26052	0.501684	36.3629	3.76797	5.28062	9.04859	7.56008	0.605823
	cc023c28e5d05e9eece500b92ed0243b74cc5d96ea56cba472bc04149d7c0911	49	24.192	8.81644	0.706501	1.93861	13.3777	5.38538	35.1273	f753e952-31a7-4a3d-9440-277001fdc6e6	1.59906	0.736148	2.33521	7.0263	0.563049	55.843	21.2717	4.91995	26.1917	8.23261	0.659716
	cc023c28e5d05e9eece500b92ed0243b74cc5d96ea56cba472bc04149d7c0911	50	19.5878	11.1209	0.89117	1.56966	14.3541	5.24366	50.4	50f82f32-9d9d-440d-8fae-c01e56f1aca4	0.648709	0.537939	1.18665	7.84605	0.628739	31.1682	2.83853	5.5439	8.38243	9.84929	0.789268
	cc023c28e5d05e9eece500b92ed0243b74cc5d96ea56cba472bc04149d7c0911	51	15.1957	8.09637	0.648798	1.2177	13.4617	3.82645	39.7091	8088b6c8-6bb1-47ea-ad57-6b9b325cd4d1	0.36058	0.834859	1.19544	7.3764	0.591104	16.6663	2.54767	5.81096	8.35863	8.90456	0.713562
	cc023c28e5d05e9eece500b92ed0243b74cc5d96ea56cba472bc04149d7c0911	52	18.1962	9.02987	0.723604	1.45814	13.6786	3.96817	35.1273	3c7a5956-c13f-4095-859e-26622d4d67be	0.322812	0.397357	0.72017	9.28037	0.743678	14.5019	3.1282	4.20096	7.32915	10.1175	0.810757
	cc023c28e5d05e9eece500b92ed0243b74cc5d96ea56cba472bc04149d7c0911	53	9.91221	10.4256	0.83545	0.79431	13.2008	4.25161	35.1273	5e0a81b5-9ce6-484f-ad11-e080d2230833	0.416229	0.421518	0.837748	12.1083	0.970289	21.861	5.96002	4.19565	10.1557	10.0741	0.807286
	cc023c28e5d05e9eece500b92ed0243b74cc5d96ea56cba472bc04149d7c0911	54	5.44387	11.4287	0.915831	0.436242	13.7126	4.25161	35.1273	c95b76fd-62df-4bf2-8b25-2f3dbc0f955f	0.567931	1.07804	1.64597	10.3892	0.83253	40.9083	6.92323	4.55448	11.4777	9.79233	0.784703
	cc023c28e5d05e9eece500b92ed0243b74cc5d96ea56cba472bc04149d7c0911	55	11.9743	8.6912	0.696465	0.959554	15.1738	3.82645	38.1818	88db1908-8033-4189-a1d8-6fbf598a710a	1.89623	0.973123	2.86935	6.51787	0.522306	22.7268	2.75068	5.05398	7.80466	7.49797	0.600846
	cc023c28e5d05e9eece500b92ed0243b74cc5d96ea56cba472bc04149d7c0911	56	5.85616	10.5755	0.847465	0.46928	14.3869	4.53505	45.8182	441457c9-bb95-4f2c-ad76-5841ae0e7dcf	0.960233	0.574564	1.5348	8.25814	0.661762	49.999	4.26417	12.8634	17.1276	8.6107	0.690014
	cc023c28e5d05e9eece500b92ed0243b74cc5d96ea56cba472bc04149d7c0911	57	8.78502	9.1861	0.736124	0.703983	14.4209	4.25161	48.8727	c73766ea-63b4-4c80-8fa9-07404647ae69	0.450919	0.581572	1.03249	6.99313	0.560391	34.1984	5.37719	23.1966	28.5738	6.73314	0.539557
	cc023c28e5d05e9eece500b92ed0243b74cc5d96ea56cba472bc04149d7c0911	58	14.691	8.99011	0.720418	1.17726	16.0173	4.53505	65.6727	8606bb33-35b3-4002-b4cb-51a36f77159e	0.620757	1.05881	1.67957	5.76986	0.462365	101.513	23.4651	32.0123	55.4774	6.11246	0.489819
	cc023c28e5d05e9eece500b92ed0243b74cc5d96ea56cba472bc04149d7c0911	59	17.5261	8.869	0.710713	1.40444	15.868	4.39333	36.6545	1a9c3a18-1c4c-46c7-96b7-a69270476ade	0.441285	1.01491	1.45619	8.61527	0.69038	26.8393	3.17305	6.2172	9.39025	8.2123	0.658089
	097dfc80530ce824b9fb4c7696399b13010391c35c639d2fcd5b12bda223baca	1	12.6964	8.69896	0.798705	1.16573	11.1408	4.45283	35.1273	cb0ef73d-531a-4497-ad18-20d93f22778a	0.310498	0.948048	1.25855	8.86488	0.813939	21.0396	3.94864	4.3994	8.34804	8.8016	0.808129
	097dfc80530ce824b9fb4c7696399b13010391c35c639d2fcd5b12bda223baca	2	6.62445	7.20759	0.661773	0.608231	8.71354	4.73113	50.4	1aacddf1-45e9-455d-ae73-025470b6d5ad	0.39247	0.766744	1.15921	5.67316	0.520888	31.8782	4.08777	13.7608	17.8486	5.0022	0.459282
	097dfc80530ce824b9fb4c7696399b13010391c35c639d2fcd5b12bda223baca	3	2.70019	11.5718	1.06247	0.247921	10.0779	5.00943	36.6545	4b9df83a-40ce-4f13-b47b-8a85c15a8615	0.474245	1.48023	1.95447	11.3919	1.04596	65.6691	12.6592	6.66889	19.3281	10.5917	0.972485
	097dfc80530ce824b9fb4c7696399b13010391c35c639d2fcd5b12bda223baca	4	6.15709	9.71919	0.892378	0.56532	9.04505	3.89622	35.1273	497a9a98-bc24-4655-b81f-259bc93b39a5	1.63902	0.481429	2.12045	8.33943	0.765695	62.6938	21.4573	4.20988	25.6672	9.15819	0.84087
	097dfc80530ce824b9fb4c7696399b13010391c35c639d2fcd5b12bda223baca	5	6.7908	12.3164	1.13084	0.623505	9.99442	5.14858	45.8182	531afb34-ebdc-43a6-8158-a47004edd33b	0.47841	1.85012	2.32853	10.7374	0.985862	97.1223	15.0555	5.39041	20.4459	11.1175	1.02077
	097dfc80530ce824b9fb4c7696399b13010391c35c639d2fcd5b12bda223baca	6	11.3656	7.01301	0.643907	1.04354	8.87833	6.81839	53.4545	a01ffde4-9278-4b43-9b21-a0e99aa13597	0.410455	0.850946	1.2614	6.52674	0.59926	65.6691	7.71435	11.2369	18.9512	6.38955	0.586663
	097dfc80530ce824b9fb4c7696399b13010391c35c639d2fcd5b12bda223baca	7	29.8863	13.1489	1.20728	2.74405	9.99651	5.14858	36.6545	44cce163-76eb-43e5-a832-8ff48989ac30	0.454061	1.27436	1.72842	10.5417	0.967895	93.5094	6.82653	5.50064	12.3272	11.1798	1.02648
	097dfc80530ce824b9fb4c7696399b13010391c35c639d2fcd5b12bda223baca	8	19.6028	11.9861	1.10051	1.79985	9.92603	4.59198	36.6545	c05974ce-f750-4097-b8c3-58c5f0130ce1	1.00251	1.14146	2.14397	10.2473	0.940868	78.8454	7.80532	5.17502	12.9803	11.8532	1.08832
	097dfc80530ce824b9fb4c7696399b13010391c35c639d2fcd5b12bda223baca	9	14.2067	11.6098	1.06597	1.30441	9.93988	4.59198	38.1818	78e49663-8a5a-4daa-ba95-0b52b4e0ba20	1.13458	0.721564	1.85614	12.0418	1.10563	87.1337	7.65325	5.424	13.0772	13.293	1.22051
	097dfc80530ce824b9fb4c7696399b13010391c35c639d2fcd5b12bda223baca	10	0.828399	11.1678	1.02538	0.0760604	9.90908	5.00943	38.1818	bbd0b1a7-d250-4511-b984-c54ac9f02c2d	0.464783	1.59007	2.05485	10.6614	0.978892	58.6559	14.923	6.14867	21.0717	10.4823	0.962445
	097dfc80530ce824b9fb4c7696399b13010391c35c639d2fcd5b12bda223baca	11	19.6086	14.6868	1.34849	1.80039	9.92177	4.59198	38.1818	762424fd-09e7-416d-88b5-92f44d99bd3e	1.11535	0.517325	1.63268	12.9138	1.18569	78.2079	22.1253	6.06462	28.1899	12.3835	1.137
	097dfc80530ce824b9fb4c7696399b13010391c35c639d2fcd5b12bda223baca	12	23.9614	11.0622	1.01569	2.20004	9.98223	5.14858	35.1273	7a2aacd7-9ea3-4ff1-8e98-ce6407347e51	0.927784	1.97245	2.90024	9.6868	0.889405	103.923	14.5438	4.62978	19.1736	8.85669	0.813187
	097dfc80530ce824b9fb4c7696399b13010391c35c639d2fcd5b12bda223baca	13	36.9161	12.0457	1.10599	3.3895	9.9573	4.73113	38.1818	e6eb7082-5840-4371-87db-2b939f1feedf	0.550953	0.861282	1.41224	12.7081	1.16681	73.5324	15.3722	5.09559	20.4678	14.1327	1.29761
	097dfc80530ce824b9fb4c7696399b13010391c35c639d2fcd5b12bda223baca	14	11.148	6.84667	0.628635	1.02357	8.62357	5.56604	61.0909	c220d01f-1a4a-4b76-9c2c-c4a74052e75e	0.44893	0.673522	1.12245	6.98968	0.641766	87.9838	32.9559	21.3469	54.3028	6.19895	0.569163
	097dfc80530ce824b9fb4c7696399b13010391c35c639d2fcd5b12bda223baca	15	12.6651	9.46488	0.869028	1.16286	11.0953	5.84434	79.4182	2bb5b6f8-c010-4d97-8b18-d54e74029e6a	0.539533	2.2588	2.79833	7.05188	0.647476	95.2096	15.4294	24.3549	39.7842	7.12133	0.653853
	097dfc80530ce824b9fb4c7696399b13010391c35c639d2fcd5b12bda223baca	16	14.1778	10.3226	0.947782	1.30175	11.2056	5.56604	45.8182	87659dde-3b79-420c-97e2-e653636401cd	0.463809	0.798733	1.26254	8.47695	0.778321	64.1814	4.76589	5.72706	10.4929	10.137	0.930738
	097dfc80530ce824b9fb4c7696399b13010391c35c639d2fcd5b12bda223baca	17	4.95932	7.5207	0.690522	0.455346	11.7811	3.75707	35.1273	9b0e423c-effe-47c4-9023-4830cac85f38	1.4788	0.958282	2.43708	5.62643	0.516597	20.6146	6.62703	32.4482	39.0752	5.15986	0.473759
	097dfc80530ce824b9fb4c7696399b13010391c35c639d2fcd5b12bda223baca	18	8.46828	7.52718	0.691116	0.777525	10.9807	5.00943	36.6545	48a26a6f-6415-4f6b-8703-b357d6eb77d3	0.616239	2.1446	2.76084	5.47057	0.502287	30.8156	3.80915	4.54463	8.35379	7.49417	0.688086
	097dfc80530ce824b9fb4c7696399b13010391c35c639d2fcd5b12bda223baca	19	11.2798	7.65084	0.702471	1.03567	11.3635	3.47877	36.6545	c3c39b74-4067-472f-96bf-0b4ccd16b16e	0.325987	0.394677	0.720664	7.49126	0.687818	9.9885	13.3457	4.58937	17.935	6.55569	0.601918
	097dfc80530ce824b9fb4c7696399b13010391c35c639d2fcd5b12bda223baca	20	9.09236	12.62	1.15872	0.834826	10.5793	5.70519	45.8182	8518453b-5f2c-4654-a466-c0556b18601f	0.553758	1.46482	2.01858	11.0986	1.01903	112.424	15.3442	6.04272	21.3869	12.351	1.13402
	097dfc80530ce824b9fb4c7696399b13010391c35c639d2fcd5b12bda223baca	21	34.6397	18.7127	1.71812	3.18048	9.51844	5.42688	38.1818	d42c0438-fb64-4f94-a341-432005ba67cd	1.12032	1.20454	2.32487	14.6045	1.34093	141.539	10.2047	4.35701	14.5617	17.7515	1.62987
	097dfc80530ce824b9fb4c7696399b13010391c35c639d2fcd5b12bda223baca	22	12.0711	11.4282	1.04929	1.10833	9.20785	4.73113	41.2364	756bb16b-c575-412a-b3b3-9400c5afd3a6	0.998708	1.39946	2.39817	9.93767	0.912439	78.4204	4.69129	10.1518	14.8431	11.0233	1.01212
	097dfc80530ce824b9fb4c7696399b13010391c35c639d2fcd5b12bda223baca	23	15.354	15.9442	1.46394	1.40975	9.52661	6.26179	41.2364	40cfe93c-4d34-4415-b46f-c24bd8926097	1.03427	0.970199	2.00447	16.0175	1.47067	154.29	6.75352	5.71309	12.4666	17.8873	1.64235
	097dfc80530ce824b9fb4c7696399b13010391c35c639d2fcd5b12bda223baca	24	17.7763	17.2763	1.58624	1.63215	9.48512	5.42688	36.6545	7d4d1426-9399-4bea-805a-6afc9b0ab473	0.574688	1.44197	2.01665	14.3013	1.31309	100.735	5.15521	4.01753	9.17275	17.2396	1.58287
	097dfc80530ce824b9fb4c7696399b13010391c35c639d2fcd5b12bda223baca	25	10.8655	9.95736	0.914247	0.997632	9.86475	4.31368	47.3455	57a1fc61-2804-45aa-a434-a2c235d17719	0.491975	2.35734	2.84932	7.50343	0.688936	42.9293	14.348	15.6721	30.0201	6.53619	0.600127
	097dfc80530ce824b9fb4c7696399b13010391c35c639d2fcd5b12bda223baca	26	10.4536	9.20426	0.845099	0.959808	10.5428	5.00943	39.7091	2166ea86-e6f5-42a2-92ad-5f12373fbbb6	0.51434	1.97199	2.48633	6.20791	0.569986	60.1435	17.6479	7.68941	25.3373	6.31222	0.579564
	097dfc80530ce824b9fb4c7696399b13010391c35c639d2fcd5b12bda223baca	27	19.917	15.6737	1.4391	1.8287	11.1181	5.00943	41.2364	2b38b025-11ba-4567-bbe2-106597c78d64	0.48482	1.85781	2.34263	13.9518	1.281	73.9574	5.62169	6.7304	12.3521	15.2961	1.40443
	097dfc80530ce824b9fb4c7696399b13010391c35c639d2fcd5b12bda223baca	28	6.5249	12.9357	1.18771	0.599091	10.8563	4.31368	35.1273	fff1bb47-be5a-4236-aa8e-3db717546330	0.584946	0.522566	1.10751	13.6037	1.24904	51.4302	15.1238	4.03203	19.1558	12.3663	1.13542
	097dfc80530ce824b9fb4c7696399b13010391c35c639d2fcd5b12bda223baca	29	35.875	19.5287	1.79305	3.29391	11.6971	5.28773	38.1818	e017eb1f-8649-446f-8dc4-51361f82ccae	0.512016	1.29103	1.80304	16.5654	1.52097	153.228	22.4303	4.24583	26.6762	18.572	1.70521
	097dfc80530ce824b9fb4c7696399b13010391c35c639d2fcd5b12bda223baca	30	14.6503	13.1937	1.2114	1.34513	9.1194	4.87028	38.1818	f0053ff3-0ae5-4ee3-bf9d-360346c43f9f	0.780613	1.15335	1.93397	10.8977	1.00058	82.0332	7.21851	7.41485	14.6334	12.163	1.11676
	097dfc80530ce824b9fb4c7696399b13010391c35c639d2fcd5b12bda223baca	31	10.183	8.83998	0.811653	0.934963	9.42734	4.03538	39.7091	ca641bdf-d763-4c67-a87b-effcc2ad07e0	1.68299	0.555794	2.23878	6.95204	0.638309	47.3923	11.7007	5.49189	17.1926	8.14205	0.747572
	097dfc80530ce824b9fb4c7696399b13010391c35c639d2fcd5b12bda223baca	32	10.4862	9.03154	0.829241	0.962802	12.1486	3.75707	42.7636	99058e79-8a20-4a34-8084-989111507b66	0.390875	0.363254	0.754129	8.11538	0.745122	19.3394	7.04586	11.1748	18.2207	6.78731	0.623185
	097dfc80530ce824b9fb4c7696399b13010391c35c639d2fcd5b12bda223baca	33	11.5782	7.57978	0.695946	1.06307	12.1615	3.75707	36.6545	d9db495d-5c2b-4c5d-8f65-6b62b38c431c	0.627441	0.825981	1.45342	5.26406	0.483326	16.1516	2.78992	5.17397	7.96389	7.5104	0.689576
	097dfc80530ce824b9fb4c7696399b13010391c35c639d2fcd5b12bda223baca	34	-1.49332	7.63547	0.70106	-0.137111	12.6935	4.03538	38.1818	4f1d4d72-2638-4942-bfcb-e33fe5e5c9d3	0.529485	0.988873	1.51836	7.00466	0.643141	19.1269	5.4286	5.68909	11.1177	7.1781	0.659065
	097dfc80530ce824b9fb4c7696399b13010391c35c639d2fcd5b12bda223baca	35	12.4216	12.4413	1.14231	1.1405	10.6811	6.95754	70.2545	b5591c24-6bf8-46e1-936b-ce6c065dc729	0.793063	0.968519	1.76158	8.37012	0.768512	265.439	74.2564	36.7781	111.035	7.56732	0.694802
	097dfc80530ce824b9fb4c7696399b13010391c35c639d2fcd5b12bda223baca	36	8.78126	17.2247	1.5815	0.806261	11.0558	4.31368	35.1273	541bf2c2-3014-4b38-900b-69f8c1374bed	0.810534	0.64075	1.45128	16.1994	1.48736	76.9327	10.7653	4.63155	15.3969	16.182	1.48577
	097dfc80530ce824b9fb4c7696399b13010391c35c639d2fcd5b12bda223baca	37	20.2912	20.4349	1.87626	1.86306	10.9574	6.54009	42.7636	568832e5-5c4b-47f2-b8cf-efa396f842b9	0.640063	1.27295	1.91301	15.2967	1.40448	107.111	5.83506	11.1309	16.9659	16.6899	1.5324
	097dfc80530ce824b9fb4c7696399b13010391c35c639d2fcd5b12bda223baca	38	13.775	17.1171	1.57163	1.26477	10.9882	5.28773	39.7091	c2b774fa-d6cd-4f7e-913d-75e24893784d	1.04213	1.35002	2.39215	13.217	1.21353	109.023	8.06238	7.66275	15.7251	15.506	1.4237
	097dfc80530ce824b9fb4c7696399b13010391c35c639d2fcd5b12bda223baca	39	3.37089	18.5496	1.70315	0.309502	10.8617	5.42688	39.7091	7c3d3809-673f-4ae8-af46-21ae2d81e913	0.574767	0.724325	1.29909	18.6949	1.71649	100.948	8.26508	6.80763	15.0727	17.6841	1.62369
	097dfc80530ce824b9fb4c7696399b13010391c35c639d2fcd5b12bda223baca	40	10.1275	20.0802	1.84368	0.929872	11.0398	4.45283	41.2364	9e528e5a-a5ad-4b50-97d1-621ea2e84674	0.711527	1.05104	1.76257	17.225	1.58154	78.8454	5.16754	6.06619	11.2337	20.2363	1.85802
	097dfc80530ce824b9fb4c7696399b13010391c35c639d2fcd5b12bda223baca	41	5.89094	17.9765	1.65053	0.540884	11.1979	5.28773	39.7091	ef22a3e9-81df-49c8-ac29-c6297cb8446b	0.625611	1.40845	2.03406	13.0267	1.19606	76.7202	4.76148	8.43237	13.1938	15.163	1.39221
	097dfc80530ce824b9fb4c7696399b13010391c35c639d2fcd5b12bda223baca	42	22.7202	17.667	1.62212	2.08608	11.2541	5.28773	36.6545	0711661d-b2da-4bd4-8df2-d82339181e0c	0.577265	1.35671	1.93397	14.7749	1.35658	87.5588	9.27889	5.20647	14.4854	15.6994	1.44146
	097dfc80530ce824b9fb4c7696399b13010391c35c639d2fcd5b12bda223baca	43	19.0663	17.1233	1.57219	1.75059	11.2951	5.00943	39.7091	8e6c39b0-a8cc-43f9-a2b6-628480651dea	0.702957	1.31022	2.01318	13.3224	1.22321	90.5341	4.50242	7.45379	11.9562	16.3762	1.5036
	097dfc80530ce824b9fb4c7696399b13010391c35c639d2fcd5b12bda223baca	44	18.0014	13.6593	1.25414	1.65282	11.4327	5.14858	38.1818	c860edbc-a8d0-43ae-8c1d-1b4861e27cf0	0.496093	1.4849	1.98099	12.2439	1.12419	81.8207	10.4077	7.36726	17.7749	12.8849	1.18304
	097dfc80530ce824b9fb4c7696399b13010391c35c639d2fcd5b12bda223baca	45	3.63289	12.5917	1.15612	0.333558	11.505	5.42688	38.1818	e39bb475-a205-4a34-84be-5bef8b02affd	0.404616	1.65836	2.06298	11.4655	1.05272	68.4319	17.1879	5.89399	23.0819	11.4787	1.05393
	097dfc80530ce824b9fb4c7696399b13010391c35c639d2fcd5b12bda223baca	46	3.0609	16.1347	1.48143	0.28104	11.5205	5.56604	41.2364	a439f1fa-4b12-40fe-b266-58fa6666e1a5	0.660214	0.64684	1.30705	15.6718	1.43892	88.6214	7.28242	10.0903	17.3727	15.859	1.45611
	097dfc80530ce824b9fb4c7696399b13010391c35c639d2fcd5b12bda223baca	47	26.1625	17.0996	1.57002	2.40214	11.4793	5.42688	41.2364	951feae9-e44d-4d30-9773-6473ab04d6c0	0.930051	1.34008	2.27014	15.7935	1.45009	104.348	7.83704	10.4403	18.2773	14.579	1.33859
	097dfc80530ce824b9fb4c7696399b13010391c35c639d2fcd5b12bda223baca	48	18.3625	14.6721	1.34713	1.68597	11.4246	5.70519	44.2909	2980a13c-1026-4990-8f15-2aaa46f3ad08	0.931887	1.13986	2.07175	12.9366	1.18779	106.473	11.1355	10.8456	21.9812	13.125	1.20509
	097dfc80530ce824b9fb4c7696399b13010391c35c639d2fcd5b12bda223baca	49	25.0148	18.817	1.72771	2.29677	11.3746	5.70519	38.1818	8a99197c-6bca-4eba-98ed-800c6539df45	0.534968	0.970508	1.50548	17.0389	1.56444	123.9	11.1492	5.215	16.3642	16.1807	1.48565
	097dfc80530ce824b9fb4c7696399b13010391c35c639d2fcd5b12bda223baca	50	13.0581	15.8092	1.45154	1.19894	11.3814	5.28773	44.2909	80850c7d-3a7f-485f-920a-d6ef3b6acfe5	0.670639	0.510763	1.1814	17.2604	1.58479	73.9574	8.19779	6.83964	15.0374	17.3604	1.59397
	097dfc80530ce824b9fb4c7696399b13010391c35c639d2fcd5b12bda223baca	51	13.1677	15.92	1.46171	1.20901	11.3635	5.70519	39.7091	82b8b818-0f66-4b06-9356-cd843612b04b	0.722044	0.587229	1.30927	15.5725	1.4298	69.0694	5.80932	8.66631	14.4756	16.2705	1.49389
	097dfc80530ce824b9fb4c7696399b13010391c35c639d2fcd5b12bda223baca	52	13.8095	10.4899	0.963145	1.26794	11.2125	5.28773	36.6545	5f8eda5e-2e3b-45e8-89a6-2b1af23ade21	0.611258	0.584481	1.19574	9.4311	0.865927	244.612	129.603	5.21813	134.821	8.50685	0.781066
	097dfc80530ce824b9fb4c7696399b13010391c35c639d2fcd5b12bda223baca	53	13.8034	10.441	0.95865	1.26737	11.206	4.87028	47.3455	53286b3d-f418-40f2-a43e-fd621bbd3f96	0.401362	0.736681	1.13804	10.678	0.980409	46.5422	8.1907	8.43438	16.6251	9.20809	0.845451
	097dfc80530ce824b9fb4c7696399b13010391c35c639d2fcd5b12bda223baca	54	1.18073	9.14298	0.839473	0.10841	11.2785	7.6533	68.7273	d35a51fd-915c-467f-97f6-4032985f877a	1.77244	1.15906	2.9315	7.17729	0.658991	197.857	52.1141	19.1573	71.2714	7.94132	0.729141
	097dfc80530ce824b9fb4c7696399b13010391c35c639d2fcd5b12bda223baca	55	12.0477	8.32898	0.764735	1.10617	11.8087	4.73113	41.2364	f39a95d5-f65b-4df6-9a69-14af41bad3d4	0.539624	1.81788	2.35751	6.22531	0.571584	40.5916	11.6655	12.1225	23.788	5.69274	0.522685
	097dfc80530ce824b9fb4c7696399b13010391c35c639d2fcd5b12bda223baca	56	11.8427	9.83931	0.903408	1.08735	11.7457	5.42688	88.5818	1b7716d0-0914-474e-aaf2-ccccf50f5e62	0.527327	1.89927	2.4266	7.57508	0.695515	223.997	5.8892	50.5583	56.4475	8.13488	0.746914
	097dfc80530ce824b9fb4c7696399b13010391c35c639d2fcd5b12bda223baca	57	15.9813	13.5	1.23952	1.46734	11.9764	4.03538	38.1818	7c8869e6-f63a-48a7-839f-4a58ff3f560f	0.394445	1.05196	1.4464	8.8587	0.813371	29.9655	3.63354	7.03535	10.6689	10.1653	0.933343
	097dfc80530ce824b9fb4c7696399b13010391c35c639d2fcd5b12bda223baca	58	21.3207	14.3041	1.31335	1.95758	12.0604	6.26179	45.8182	bf6a85c8-5156-472d-948e-c144e1c8e737	1.38287	1.1515	2.53437	12.7774	1.17318	199.983	18.8592	10.0735	28.9327	13.4182	1.23201
	097dfc80530ce824b9fb4c7696399b13010391c35c639d2fcd5b12bda223baca	59	2.53391	9.3223	0.855938	0.232654	11.8903	5.28773	36.6545	aff2338e-e891-4721-856f-62ec2e46d951	0.976407	0.534277	1.51068	6.66836	0.612263	45.4796	17.5559	21.9939	39.5498	5.71857	0.525057
	097dfc80530ce824b9fb4c7696399b13010391c35c639d2fcd5b12bda223baca	60	14.1054	9.19526	0.844273	1.29511	12.1827	3.61792	33.6	73601ab2-77c2-43d5-b3b9-ce0c898d7d45	0.436351	0.672748	1.1091	7.58791	0.696693	11.6887	4.44434	3.21669	7.66103	8.13187	0.746637
	097dfc80530ce824b9fb4c7696399b13010391c35c639d2fcd5b12bda223baca	61	10.1434	7.89944	0.725296	0.931324	12.1229	3.89622	33.6	81d4a6bf-cc26-4b63-9ba5-f5a4e851b5a6	4.36837	0.88629	5.25466	5.32471	0.488894	24.2274	3.09533	4.49373	7.58907	7.70496	0.707439
	097dfc80530ce824b9fb4c7696399b13010391c35c639d2fcd5b12bda223baca	62	10.9943	7.48806	0.687525	1.00946	12.1485	3.75707	38.1818	916e23a9-aeab-409d-84d0-7c1c8bbd768b	1.86586	1.08945	2.95531	5.66151	0.519818	14.8765	2.84491	5.12749	7.9724	7.89091	0.724513
	097dfc80530ce824b9fb4c7696399b13010391c35c639d2fcd5b12bda223baca	63	30.7143	9.47172	0.869657	2.82007	12.438	4.03538	33.6	05248482-4d07-410c-b28e-797c8275163d	0.505729	0.976953	1.48268	6.96901	0.639868	24.865	4.32945	3.34284	7.67229	8.70881	0.799609
	097dfc80530ce824b9fb4c7696399b13010391c35c639d2fcd5b12bda223baca	64	7.17093	8.67738	0.796723	0.658407	12.0282	3.61792	35.1273	a15980be-b706-4bd7-9bd5-048aa500b77b	0.402853	0.464551	0.867404	7.73467	0.710167	14.2389	3.89303	5.39374	9.28677	8.374	0.768868
	097dfc80530ce824b9fb4c7696399b13010391c35c639d2fcd5b12bda223baca	65	2.24164	8.24796	0.757296	0.205818	12.0229	5.00943	39.7091	6bcabe38-8ea9-4d9f-b662-f4c7afe6908f	1.04457	1.88813	2.9327	5.99869	0.550777	67.7943	5.40577	3.72037	9.12614	7.7697	0.713384
	097dfc80530ce824b9fb4c7696399b13010391c35c639d2fcd5b12bda223baca	66	8.2625	8.50793	0.781165	0.75863	10.8808	4.73113	41.2364	e14ef68d-ce08-4382-8778-1073b3b5f4a1	2.30585	1.04913	3.35498	4.28631	0.393552	103.073	58.6171	5.11652	63.7336	6.14608	0.564309
	097dfc80530ce824b9fb4c7696399b13010391c35c639d2fcd5b12bda223baca	67	2.40405	8.55514	0.7855	0.22073	10.7857	4.87028	44.2909	716a1d40-e935-489c-b0f3-a72a4c8bac1e	0.44815	0.941174	1.38932	6.75042	0.619798	78.6329	7.50163	5.88643	13.3881	6.90408	0.633906
	097dfc80530ce824b9fb4c7696399b13010391c35c639d2fcd5b12bda223baca	68	5.616	10.1653	0.933338	0.515639	10.7732	4.87028	50.4	9897913a-76fb-4772-94b6-2fd116485278	1.86871	1.87369	3.7424	7.36751	0.676456	106.898	6.22822	15.9841	22.2123	7.85554	0.721265
	097dfc80530ce824b9fb4c7696399b13010391c35c639d2fcd5b12bda223baca	69	10.1884	6.88714	0.63235	0.935458	11.7638	4.17453	42.7636	9d2ed141-2eae-444b-ad6f-7008b29e50d1	0.98702	2.64823	3.63525	5.38083	0.494047	29.5405	2.70713	10.9196	13.6267	5.58891	0.513152
	097dfc80530ce824b9fb4c7696399b13010391c35c639d2fcd5b12bda223baca	70	14.7231	11.3409	1.04128	1.35181	11.7863	4.59198	36.6545	22b5c28a-5990-43cb-aae3-9dcc3fee2da1	0.520133	1.01123	1.53136	9.24419	0.848766	86.9212	31.2097	6.96192	38.1716	8.9997	0.826317
	097dfc80530ce824b9fb4c7696399b13010391c35c639d2fcd5b12bda223baca	71	9.61107	12.9763	1.19144	0.882451	11.5439	5.42688	44.2909	efcb841e-aaf3-437b-be09-4fe31ec2b4cc	1.03827	1.56308	2.60135	11.6745	1.0719	79.2705	3.94969	9.6723	13.622	12.7875	1.1741
	097dfc80530ce824b9fb4c7696399b13010391c35c639d2fcd5b12bda223baca	72	13.1014	15.1191	1.38818	1.20292	11.5558	4.59198	41.2364	c7d5f7d5-e1f2-49a7-94c0-abe96ee5178a	0.557315	1.15028	1.70759	12.1728	1.11766	74.3825	5.52023	7.62306	13.1433	13.5855	1.24737
	097dfc80530ce824b9fb4c7696399b13010391c35c639d2fcd5b12bda223baca	73	18.0321	14.3009	1.31305	1.65564	11.6191	4.73113	36.6545	7884c021-9ee8-414e-968c-4afbeae27af1	0.653679	1.08742	1.7411	12.7988	1.17513	66.7317	13.91	3.64115	17.5511	13.7761	1.26487
	097dfc80530ce824b9fb4c7696399b13010391c35c639d2fcd5b12bda223baca	74	13.9097	12.7842	1.1738	1.27714	11.6451	5.84434	36.6545	bfd2976c-7185-4c10-950a-6564d35a0e46	0.581619	1.34298	1.92459	11.2207	1.03025	67.7943	7.94913	4.20174	12.1509	13.1093	1.20365
	097dfc80530ce824b9fb4c7696399b13010391c35c639d2fcd5b12bda223baca	75	7.98268	15.8386	1.45424	0.732939	11.6377	5.14858	42.7636	62b75e57-0989-4af2-8f94-f420659527c6	0.981167	1.28039	2.26156	12.579	1.15495	90.7466	6.34832	8.04793	14.3963	14.1453	1.29876
	097dfc80530ce824b9fb4c7696399b13010391c35c639d2fcd5b12bda223baca	76	13.9587	17.6297	1.61869	1.28163	11.6229	4.87028	38.1818	cde22e1d-6170-4c95-a64c-861b4924a609	0.678046	1.06818	1.74622	15.9854	1.46772	90.109	8.88069	5.07377	13.9545	17.8366	1.63769
	097dfc80530ce824b9fb4c7696399b13010391c35c639d2fcd5b12bda223baca	77	19.913	16.5521	1.51975	1.82833	11.6474	5.00943	39.7091	a14daf0d-3f1c-4da3-ab6a-d31af376381e	0.715797	0.837243	1.55304	15.0528	1.38209	130.276	5.77826	5.6407	11.419	16.7587	1.53872
	097dfc80530ce824b9fb4c7696399b13010391c35c639d2fcd5b12bda223baca	78	11.4098	12.9564	1.18961	1.0476	11.634	5.00943	39.7091	34d6c485-986d-4f23-af89-c1c07b024ea9	0.64897	1.33165	1.98062	11.8545	1.08844	110.511	9.13738	6.08013	15.2175	12.572	1.15432
	097dfc80530ce824b9fb4c7696399b13010391c35c639d2fcd5b12bda223baca	79	15.2281	14.7596	1.35517	1.39818	12.1984	5.14858	71.7818	f5b4cdb9-1a6d-4f39-a663-2ff5a0a95acf	1.67295	1.74301	3.41597	11.8297	1.08616	258.426	27.1291	40.1726	67.3017	12.2944	1.12882
	097dfc80530ce824b9fb4c7696399b13010391c35c639d2fcd5b12bda223baca	80	28.7711	17.3419	1.59227	2.64165	11.7893	5.00943	36.6545	d3317714-e7b1-42f9-8dc7-912e71bf812c	0.600033	1.06306	1.66309	15.9922	1.46834	82.6708	5.35328	4.97502	10.3283	17.0053	1.56136
	097dfc80530ce824b9fb4c7696399b13010391c35c639d2fcd5b12bda223baca	81	16.915	13.8991	1.27616	1.55307	11.9269	4.87028	39.7091	0ad7ec05-634c-4a30-b3ba-b03c7bd65532	0.691115	1.12305	1.81417	10.8606	0.997179	83.7334	8.79938	9.18956	17.9889	11.9054	1.09311
	097dfc80530ce824b9fb4c7696399b13010391c35c639d2fcd5b12bda223baca	82	10.3916	15.1074	1.3871	0.954119	11.9652	4.31368	42.7636	f8f4e029-838b-4d2b-9f5c-bf46c8ba671c	1.37147	0.715617	2.08709	13.6069	1.24934	117.312	7.10156	10.5314	17.6329	14.677	1.34759
	097dfc80530ce824b9fb4c7696399b13010391c35c639d2fcd5b12bda223baca	83	9.28983	7.82192	0.718179	0.852956	11.9603	3.47877	38.1818	819179ad-abd8-4372-97e0-ad444a93ea51	0.377137	0.625563	1.0027	6.93258	0.636523	14.2389	2.80654	6.7491	9.55564	8.01942	0.736312
	097dfc80530ce824b9fb4c7696399b13010391c35c639d2fcd5b12bda223baca	84	17.9314	15.4464	1.41823	1.64639	12.0965	5.28773	33.6	66dddd6d-f353-47cb-a741-d2d0214e3e40	0.597673	1.04958	1.64726	12.3107	1.13032	90.109	16.3053	2.73237	19.0377	15.3279	1.40735
	097dfc80530ce824b9fb4c7696399b13010391c35c639d2fcd5b12bda223baca	85	11.6043	11.5025	1.05611	1.06546	12.2394	5.00943	42.7636	952bad3e-24bf-416b-856d-98b4a9a21277	0.976029	1.32726	2.30329	10.0051	0.918633	53.9804	5.38178	10.129	15.5108	11.3903	1.04582
	097dfc80530ce824b9fb4c7696399b13010391c35c639d2fcd5b12bda223baca	86	12.9971	14.33	1.31573	1.19334	12.2919	5.84434	35.1273	c8396b33-262d-4b22-8f78-c92b56ddcfbc	0.457602	0.627329	1.08493	11.2633	1.03416	73.9574	19.8815	4.26458	24.1461	13.3795	1.22845
	097dfc80530ce824b9fb4c7696399b13010391c35c639d2fcd5b12bda223baca	87	19.1078	15.7056	1.44203	1.75441	12.5833	6.54009	54.9818	a2de32e0-e445-48f2-aa8c-c06f647e4766	2.23769	1.57168	3.80937	12.5374	1.15114	301.143	20.5505	10.9849	31.5353	13.0092	1.19446
	097dfc80530ce824b9fb4c7696399b13010391c35c639d2fcd5b12bda223baca	88	6.92414	7.39204	0.678708	0.635748	12.5656	4.17453	42.7636	e89e9741-c4ac-4b2f-b722-ee719526bf66	0.438184	0.823325	1.26151	7.48301	0.687061	15.5141	3.88234	4.63101	8.51335	7.59757	0.69758
	097dfc80530ce824b9fb4c7696399b13010391c35c639d2fcd5b12bda223baca	89	27.3415	9.60973	0.882328	2.51039	12.4259	3.75707	41.2364	69d5c26c-ca5a-478e-ac82-11ec87ff466e	0.338137	0.43887	0.777007	10.7794	0.989721	15.5141	3.26547	5.32054	8.58601	10.205	0.936979
	097dfc80530ce824b9fb4c7696399b13010391c35c639d2fcd5b12bda223baca	90	3.70986	7.99738	0.734289	0.340625	12.4665	3.47877	35.1273	ea1bd9cd-dfd7-470d-9edf-ca685c463157	0.339406	0.401495	0.740901	7.24492	0.665201	9.35094	2.959	7.74437	10.7034	7.16844	0.658179
	097dfc80530ce824b9fb4c7696399b13010391c35c639d2fcd5b12bda223baca	91	8.98887	13.5802	1.24688	0.825324	12.4474	5.00943	41.2364	43357f7d-2ce3-4716-907a-5279c802a668	0.695776	0.521861	1.21764	12.6638	1.16274	79.0579	16.1965	8.47583	24.6723	11.06	1.01549
	097dfc80530ce824b9fb4c7696399b13010391c35c639d2fcd5b12bda223baca	92	3.81005	8.75623	0.803963	0.349824	12.5137	3.89622	38.1818	9e9103a4-d73a-4aed-85cb-b1ffe38122c3	0.61831	0.835817	1.45413	7.98867	0.733489	34.641	13.1114	4.05751	17.1689	9.38562	0.861752
	097dfc80530ce824b9fb4c7696399b13010391c35c639d2fcd5b12bda223baca	93	10.0312	15.6511	1.43703	0.921024	12.4488	5.00943	38.1818	55e925a6-8bd7-4d24-9883-8a0a1433a4e3	0.770575	1.27029	2.04087	10.5147	0.965418	57.5933	4.21501	6.57807	10.7931	13.8192	1.26882
	097dfc80530ce824b9fb4c7696399b13010391c35c639d2fcd5b12bda223baca	94	5.85209	12.1039	1.11133	0.537316	12.4485	5.28773	39.7091	8ee1acdb-099c-40de-9429-29f9b79fd670	0.661869	0.484508	1.14638	11.3432	1.04149	80.1205	16.8371	6.06462	22.9017	11.4739	1.05349
	097dfc80530ce824b9fb4c7696399b13010391c35c639d2fcd5b12bda223baca	95	11.3071	10.8774	0.998718	1.03817	12.3076	5.00943	48.8727	d8e3fcbd-1b05-4717-90e5-067d8746b352	0.719777	1.44163	2.16141	8.40932	0.772112	113.486	13.1337	15.2314	28.3651	9.54929	0.876779
	097dfc80530ce824b9fb4c7696399b13010391c35c639d2fcd5b12bda223baca	96	15.3288	13.6379	1.25218	1.40743	12.2715	5.98349	80.9455	7d470cb3-86a5-4f87-b929-1c78e03fb7bc	0.523228	1.44094	1.96417	10.0772	0.92525	172.78	5.20088	40.2388	45.4397	9.49943	0.872201
	097dfc80530ce824b9fb4c7696399b13010391c35c639d2fcd5b12bda223baca	97	13.7699	10.0512	0.922865	1.2643	12.1161	4.59198	53.4545	174b5a85-5e3b-4b06-8667-6cd9dd8d1c18	0.743322	1.20035	1.94367	8.54808	0.784851	80.1205	4.1257	20.8726	24.9983	10.6054	0.973746
	097dfc80530ce824b9fb4c7696399b13010391c35c639d2fcd5b12bda223baca	98	15.4078	11.7595	1.07971	1.41469	12.0853	5.14858	39.7091	13bbe814-513a-4833-9c21-934ebd72ff9d	0.764717	1.50923	2.27395	9.39251	0.862384	86.7087	15.0512	9.03085	24.0821	9.81604	0.90127
	097dfc80530ce824b9fb4c7696399b13010391c35c639d2fcd5b12bda223baca	99	21.3893	12.0264	1.10422	1.96389	12.0077	4.87028	42.7636	31e3f3f3-c83e-44a2-911c-538a1a940ad6	0.895107	1.3797	2.2748	9.41534	0.86448	72.4698	10.2676	10.5175	20.7852	9.12182	0.83753
	097dfc80530ce824b9fb4c7696399b13010391c35c639d2fcd5b12bda223baca	100	2.40201	10.8129	0.992797	0.220544	12.0992	5.28773	42.7636	c18a7795-a075-4dde-8a6b-519e4f33e9e2	0.492081	1.56466	2.05674	10.6133	0.974475	73.1073	4.30089	6.14003	10.4409	12.2925	1.12865
	097dfc80530ce824b9fb4c7696399b13010391c35c639d2fcd5b12bda223baca	101	15.4009	15.1299	1.38917	1.41405	12.017	4.59198	41.2364	c9fd8ef2-1e05-4049-8ea4-ee68c01b4cb0	1.11619	1.17896	2.29515	13.7309	1.26072	73.7449	8.30923	4.28653	12.5958	15.8511	1.45539
	097dfc80530ce824b9fb4c7696399b13010391c35c639d2fcd5b12bda223baca	102	13.0088	8.08616	0.74244	1.19441	12.1175	4.31368	39.7091	071de4fa-843b-4836-93da-9985e0dcb183	0.334922	0.586072	0.920994	6.09293	0.55943	14.0264	2.95811	6.09639	9.0545	7.22852	0.663695
	097dfc80530ce824b9fb4c7696399b13010391c35c639d2fcd5b12bda223baca	103	12.547	11.6053	1.06555	1.15202	12.0141	5.14858	50.4	b603c874-275b-4373-bf90-19a9f1fe4c13	0.774748	1.86682	2.64157	10.2212	0.938475	58.8684	4.58545	13.7096	18.295	10.4575	0.960165
	097dfc80530ce824b9fb4c7696399b13010391c35c639d2fcd5b12bda223baca	104	13.1283	9.94011	0.912662	1.20539	12.2769	3.61792	38.1818	73bab69c-e54e-47d5-8b2e-690476d9f217	1.3345	0.603966	1.93846	7.63752	0.701247	45.4796	16.2673	6.84013	23.1075	8.85389	0.81293
	097dfc80530ce824b9fb4c7696399b13010391c35c639d2fcd5b12bda223baca	105	15.3126	18.0007	1.65275	1.40595	12.7256	5.42688	35.1273	01ea76e4-a33b-4010-bfc3-e552069b3d56	0.615788	0.875054	1.49084	14.8373	1.3623	221.66	23.0885	3.09982	26.1883	17.7744	1.63198
	097dfc80530ce824b9fb4c7696399b13010391c35c639d2fcd5b12bda223baca	106	15.1602	14.4384	1.32567	1.39195	12.115	4.59198	42.7636	c8d14559-84f0-4be8-ae88-9f10bfb1c8af	1.06353	1.0893	2.15283	11.1782	1.02634	93.0843	20.5971	10.8891	31.4861	10.8166	0.99314
	9a7a5aae397ea3f5a973d299a2ea9dd33bbd35b1201008ad5e8fec4bb41c0395	1	21.2128	12.6474	0.964441	1.61761	10.1073	4.53085	38.1818	92a79aa0-8573-4b2b-b0cf-1968209929ae	1.12732	1.32529	2.45262	12.6166	0.962093	73.7396	15.59	7.44688	23.0369	13.107	0.999487
	9a7a5aae397ea3f5a973d299a2ea9dd33bbd35b1201008ad5e8fec4bb41c0395	2	8.57831	7.02001	0.535318	0.654148	8.46231	3.8229	42.7636	233bfcc9-183c-44f1-b28b-879bc01eac9a	0.734243	0.411064	1.14531	7.81233	0.595737	47.7902	12.8904	9.63994	22.5303	7.99623	0.609761
	9a7a5aae397ea3f5a973d299a2ea9dd33bbd35b1201008ad5e8fec4bb41c0395	3	18.0345	11.7627	0.896977	1.37524	8.69357	4.67244	39.7091	e9ca5373-146f-4522-b784-3a36765097fc	0.51743	0.61625	1.13368	12.2304	0.932641	69.4147	12.6121	7.32267	19.9348	11.9618	0.912162
	9a7a5aae397ea3f5a973d299a2ea9dd33bbd35b1201008ad5e8fec4bb41c0395	4	9.7783	13.1593	1.00347	0.745654	12.474	3.96449	36.6545	d4fbe155-0dcd-4bb4-8bcf-9ad93dac613a	1.10681	0.546627	1.65344	10.7713	0.821374	44.5465	10.7834	5.12282	15.9063	12.8806	0.982223
	9a7a5aae397ea3f5a973d299a2ea9dd33bbd35b1201008ad5e8fec4bb41c0395	5	8.78553	8.28801	0.63201	0.66995	8.65771	5.23879	35.1273	973f3b46-1bfb-48e5-bf32-78474be55b97	0.89276	0.742948	1.63571	9.35269	0.713199	78.7132	23.9402	5.654	29.5942	8.93635	0.68145
	9a7a5aae397ea3f5a973d299a2ea9dd33bbd35b1201008ad5e8fec4bb41c0395	6	13.9153	9.73214	0.742134	1.06113	10.3322	3.39814	33.6	734f79e5-a6d8-4d6a-ac90-11cf9e7dfa1b	0.295959	0.346142	0.642101	10.7585	0.820402	9.29854	2.49377	2.79623	5.28999	13.0559	0.995587
	9a7a5aae397ea3f5a973d299a2ea9dd33bbd35b1201008ad5e8fec4bb41c0395	7	28.9724	13.251	1.01047	2.20932	11.4823	6.22992	39.7091	53d6761e-c5ed-4bfa-8bf7-345ebfa7a998	0.490219	0.631183	1.1214	11.0256	0.840769	202.622	61.3649	9.88534	71.2503	8.52136	0.649805
	9a7a5aae397ea3f5a973d299a2ea9dd33bbd35b1201008ad5e8fec4bb41c0395	8	4.54585	8.72357	0.665225	0.346648	10.4623	4.67244	62.6182	2e90c704-a48b-4808-bf44-11038e0209ab	2.38034	0.579485	2.95982	7.48061	0.570441	176.24	41.0237	21.9257	62.9493	6.89318	0.525647
	9a7a5aae397ea3f5a973d299a2ea9dd33bbd35b1201008ad5e8fec4bb41c0395	9	21.9547	9.40063	0.716854	1.67418	10.4095	3.39814	39.7091	c5f2513d-2695-430c-b2c6-2570e9e3c4cc	0.309	0.390546	0.699546	7.69938	0.587124	10.596	1.99256	5.58874	7.58129	8.28046	0.631435
	9a7a5aae397ea3f5a973d299a2ea9dd33bbd35b1201008ad5e8fec4bb41c0395	10	7.61298	10.9963	0.838534	0.580536	11.4583	4.67244	53.4545	bd350209-86b2-449b-9616-b51b727e7e2e	0.572212	1.07966	1.65187	9.36018	0.71377	128.45	34.2176	7.98477	42.2024	8.88787	0.677754
	9a7a5aae397ea3f5a973d299a2ea9dd33bbd35b1201008ad5e8fec4bb41c0395	11	8.47057	8.477	0.646422	0.645932	11.1328	4.10608	62.6182	4cb81d51-5d3f-4cdf-ba2e-2596da86645e	1.08141	1.025	2.10641	5.81225	0.443219	55.1425	3.57213	13.1525	16.7246	7.44089	0.567412
	9a7a5aae397ea3f5a973d299a2ea9dd33bbd35b1201008ad5e8fec4bb41c0395	12	23.4131	10.8626	0.828341	1.78539	11.1926	5.0972	35.1273	68196195-3d04-4e19-8957-ef8ed36846b4	0.726468	1.23805	1.96452	9.07016	0.691654	100.986	5.61603	3.6853	9.30133	11.7811	0.898379
	9a7a5aae397ea3f5a973d299a2ea9dd33bbd35b1201008ad5e8fec4bb41c0395	13	5.11416	9.17771	0.699856	0.389986	11.5807	4.67244	42.7636	01d15c26-f1f8-4414-9a57-4fce1649bfed	1.77219	1.48092	3.25311	6.53267	0.498156	69.8471	19.4458	11.7392	31.1851	7.64389	0.582892
	9a7a5aae397ea3f5a973d299a2ea9dd33bbd35b1201008ad5e8fec4bb41c0395	14	14.5215	9.92526	0.756861	1.10735	11.8331	4.24767	38.1818	2976e521-c531-4e92-bbc1-53ae13e8388f	0.46359	1.09616	1.55975	7.44516	0.567738	34.8155	4.55659	6.28706	10.8437	8.76892	0.668683
	9a7a5aae397ea3f5a973d299a2ea9dd33bbd35b1201008ad5e8fec4bb41c0395	15	19.9473	9.4043	0.717134	1.5211	13.8861	4.53085	38.1818	cb29b058-b9aa-42e0-bb32-5158f6374178	0.563572	0.620972	1.18454	9.67842	0.738038	77.8482	7.26093	7.00187	14.2628	10.2255	0.779755
	9a7a5aae397ea3f5a973d299a2ea9dd33bbd35b1201008ad5e8fec4bb41c0395	16	14.3766	12.6684	0.966045	1.0963	12.9011	6.22992	67.2	a2e29af8-d0bb-4f14-acfb-603313f8f3c9	1.28226	2.66818	3.95044	8.81626	0.672293	300.797	26.3865	33.2869	59.6733	10.0327	0.765055
	9a7a5aae397ea3f5a973d299a2ea9dd33bbd35b1201008ad5e8fec4bb41c0395	17	19.1157	26.2474	2.00152	1.45769	11.744	6.37151	164.945	13ec0314-d7aa-4e66-bba5-f54b9a005e27	3.62586	1.50269	5.12855	22.7355	1.73372	1625.3	47.6368	18.1887	65.8255	22.6416	1.72656
	9a7a5aae397ea3f5a973d299a2ea9dd33bbd35b1201008ad5e8fec4bb41c0395	18	7.56672	13.2021	1.00674	0.577008	12.0135	6.22992	45.8182	51d8abf8-e6f1-4227-bee3-b47f3ff5a08b	0.910692	1.29746	2.20815	12.9569	0.98804	109.636	10.4936	9.92338	20.417	12.5291	0.955418
	9a7a5aae397ea3f5a973d299a2ea9dd33bbd35b1201008ad5e8fec4bb41c0395	19	18.9933	14.77	1.1263	1.44835	12.0145	7.07945	50.4	d412e5b3-6148-4b5e-8202-0571b7e69bae	0.63682	2.5605	3.19732	13.4176	1.02317	164.13	5.01792	13.0652	18.0831	14.1718	1.08068
	9a7a5aae397ea3f5a973d299a2ea9dd33bbd35b1201008ad5e8fec4bb41c0395	20	9.27219	11.1389	0.849411	0.70706	12.0156	4.95562	64.1455	16e2b4fb-062f-4fe1-a655-e04259a57017	1.59152	1.36729	2.95882	8.02184	0.611713	201.324	39.5253	32.1641	71.6894	8.24231	0.628526
	9a7a5aae397ea3f5a973d299a2ea9dd33bbd35b1201008ad5e8fec4bb41c0395	21	5.52145	8.90845	0.679323	0.421043	13.9525	3.39814	35.1273	e86fb464-6f00-44f0-bf48-6ea35d73d657	0.364602	0.457905	0.822507	8.47545	0.646304	9.08229	3.74945	21.7891	25.5385	8.01135	0.610914
	9a7a5aae397ea3f5a973d299a2ea9dd33bbd35b1201008ad5e8fec4bb41c0395	22	6.36978	8.8314	0.673447	0.485734	13.9912	3.8229	33.6	099c9838-ce9e-459b-aa49-d111fef8f025	0.352176	0.842763	1.19494	7.65988	0.584112	13.1909	3.02095	3.49001	6.51096	8.78503	0.669911
	9a7a5aae397ea3f5a973d299a2ea9dd33bbd35b1201008ad5e8fec4bb41c0395	23	14.0324	14.6487	1.11705	1.07005	12.386	5.23879	41.2364	be9072dd-7f46-45d3-971f-e5a5d69f1589	0.400786	0.972164	1.37295	13.6342	1.03969	100.338	12.4882	8.50849	20.9967	12.9948	0.990935
	9a7a5aae397ea3f5a973d299a2ea9dd33bbd35b1201008ad5e8fec4bb41c0395	24	6.59557	7.5717	0.577388	0.502952	11.0505	5.0972	36.6545	8714142d-a23f-4516-bfa7-b7c625f62436	1.94545	1.25582	3.20127	6.39816	0.487898	41.519	4.10886	6.80667	10.9155	7.84656	0.598347
	9a7a5aae397ea3f5a973d299a2ea9dd33bbd35b1201008ad5e8fec4bb41c0395	25	16.8566	18.2011	1.38794	1.28542	12.011	5.23879	38.1818	85c8023d-a194-4ad0-a547-098e2313797e	0.987219	0.836136	1.82335	16.6212	1.26747	245.438	29.1874	5.60347	34.7909	16.7053	1.27388
	9a7a5aae397ea3f5a973d299a2ea9dd33bbd35b1201008ad5e8fec4bb41c0395	26	1.54137	14.1082	1.07583	0.117539	13.5179	5.66356	76.3636	18c90a8f-c87b-4c2a-a157-6ebc80fcddc0	0.566335	1.28251	1.84885	10.1433	0.773486	198.08	45.1171	42.1603	87.2774	9.20134	0.701658
	9a7a5aae397ea3f5a973d299a2ea9dd33bbd35b1201008ad5e8fec4bb41c0395	27	7.83809	9.19038	0.700822	0.597702	12.1713	4.10608	41.2364	1d7b3c76-9aea-40ce-8272-b17d10509e03	0.64303	1.21692	1.85995	7.15279	0.545443	40.6541	11.5515	11.2026	22.754	7.453	0.568336
	9a7a5aae397ea3f5a973d299a2ea9dd33bbd35b1201008ad5e8fec4bb41c0395	28	11.9251	10.8387	0.826515	0.909363	12.0075	4.38926	42.7636	9d9a4246-2fc1-4e86-bad1-69581995fb89	1.51957	0.870577	2.39015	7.05166	0.537732	44.7627	3.15063	8.95745	12.1081	9.5484	0.728123
	9a7a5aae397ea3f5a973d299a2ea9dd33bbd35b1201008ad5e8fec4bb41c0395	29	20.8016	11.5896	0.883773	1.58625	13.2529	4.81403	35.1273	fc7edf74-a676-4dbe-a0b6-397b27f865bd	0.540099	0.896717	1.43682	9.82785	0.749432	41.7353	4.02275	3.56011	7.58286	12.062	0.919798
	9a7a5aae397ea3f5a973d299a2ea9dd33bbd35b1201008ad5e8fec4bb41c0395	30	38.7719	17.925	1.36689	2.95659	11.3742	7.36263	45.8182	a3c5d160-0f33-4043-9280-f838ba427b4c	0.716108	0.81859	1.5347	13.9203	1.0615	550.776	110.703	7.12913	117.832	13.4272	1.02391
	9a7a5aae397ea3f5a973d299a2ea9dd33bbd35b1201008ad5e8fec4bb41c0395	31	15.3339	12.7069	0.968976	1.1693	14.6038	5.80515	38.1818	69c3cc38-869d-4ce0-82d5-8fde192d2ea7	0.724357	0.535724	1.26008	13.1446	1.00236	177.321	36.3543	6.84064	43.1949	12.6228	0.962565
	9a7a5aae397ea3f5a973d299a2ea9dd33bbd35b1201008ad5e8fec4bb41c0395	32	10.082	7.56092	0.576566	0.768816	12.7738	3.68131	48.8727	61a48007-c8d8-401d-86b9-45f46b25e592	3.34094	0.903871	4.24481	4.12659	0.314678	53.6288	19.6687	17.6188	37.2875	6.01163	0.458423
	9a7a5aae397ea3f5a973d299a2ea9dd33bbd35b1201008ad5e8fec4bb41c0395	33	-2.48056	12.7312	0.970834	-0.189158	12.3516	4.53085	64.1455	e7e23643-8146-439e-aa89-e8aeb811be2b	0.77399	0.648953	1.42294	12.5662	0.958249	130.18	5.96956	27.1186	33.0881	12.4273	0.947656
	9a7a5aae397ea3f5a973d299a2ea9dd33bbd35b1201008ad5e8fec4bb41c0395	34	5.97542	13.0614	0.996009	0.455661	13.7188	4.24767	38.1818	cf274930-2a97-41da-ad0b-a45895df6adf	0.437572	0.874024	1.3116	11.2463	0.857602	29.8418	4.12717	7.957	12.0842	10.8549	0.827755
	9a7a5aae397ea3f5a973d299a2ea9dd33bbd35b1201008ad5e8fec4bb41c0395	35	17.8629	9.77382	0.745313	1.36216	13.4765	4.53085	35.1273	209a77d4-02ad-4a57-8667-8ed0f09f43bf	0.699059	0.680988	1.38005	8.3848	0.639391	50.6013	13.0125	5.07733	18.0898	7.99878	0.609955
	9a7a5aae397ea3f5a973d299a2ea9dd33bbd35b1201008ad5e8fec4bb41c0395	36	4.51391	9.41742	0.718135	0.344213	13.299	4.81403	39.7091	364219cf-7cfd-468d-88fd-1b45ef6b6f6d	0.552851	1.0369	1.58975	10.0488	0.76628	65.9547	9.37047	3.99821	13.3687	10.5007	0.800739
	9a7a5aae397ea3f5a973d299a2ea9dd33bbd35b1201008ad5e8fec4bb41c0395	37	9.18689	8.28713	0.631944	0.700556	12.4466	3.68131	35.1273	b56c4090-e941-414c-9ee6-baa7f84f8b8d	0.380539	0.507087	0.887626	7.24371	0.552377	8.6498	2.26244	3.34796	5.6104	10.1289	0.772388
	9a7a5aae397ea3f5a973d299a2ea9dd33bbd35b1201008ad5e8fec4bb41c0395	38	25.7649	9.73295	0.742196	1.96473	13.1346	5.38038	44.2909	b223d724-dc81-4c79-b22d-cd945f5cf9ed	0.486619	1.07529	1.56191	8.01699	0.611343	205.649	71.3576	12.8529	84.2106	6.17612	0.470966
	9a7a5aae397ea3f5a973d299a2ea9dd33bbd35b1201008ad5e8fec4bb41c0395	39	12.135	10.329	0.787646	0.925367	13.7677	5.66356	82.4727	3ca87152-51fa-42f7-bac7-cfce45548696	0.635855	0.772471	1.40833	7.07533	0.539537	118.502	24.842	35.0755	59.9175	7.85135	0.598712
	9a7a5aae397ea3f5a973d299a2ea9dd33bbd35b1201008ad5e8fec4bb41c0395	40	16.5299	9.76098	0.744333	1.26051	12.5756	4.24767	36.6545	ff9d97f8-3fc1-4eb5-a652-f8c7393fae7c	0.294547	1.56076	1.85531	5.81118	0.443137	18.3808	2.82525	8.20487	11.0301	6.50754	0.496239
	9a7a5aae397ea3f5a973d299a2ea9dd33bbd35b1201008ad5e8fec4bb41c0395	41	13.9549	10.7064	0.816426	1.06415	12.2576	3.39814	47.3455	f17e09b7-42b4-41d2-87fb-47ee25ffb01e	0.329575	0.764988	1.09456	8.073	0.615615	19.6783	2.97485	4.93546	7.9103	10.3947	0.792655
	9a7a5aae397ea3f5a973d299a2ea9dd33bbd35b1201008ad5e8fec4bb41c0395	42	16.3677	9.47248	0.722334	1.24814	13.7531	4.67244	35.1273	da002f64-99dc-4a5a-86ae-a42653adfb02	1.69631	1.40827	3.10458	6.53043	0.497984	35.4642	4.37387	4.83609	9.20997	10.511	0.801525
	9a7a5aae397ea3f5a973d299a2ea9dd33bbd35b1201008ad5e8fec4bb41c0395	43	14.0946	12.7051	0.968839	1.0748	13.6633	6.22992	47.3455	04106ebb-3cd8-423f-9351-5b3c560fab39	0.727869	0.828741	1.55661	11.5677	0.882108	263.819	63.1724	13.2884	76.4608	9.9732	0.760517
	9a7a5aae397ea3f5a973d299a2ea9dd33bbd35b1201008ad5e8fec4bb41c0395	44	2.52078	8.33502	0.635595	0.192225	11.3489	3.39814	35.1273	8e30e739-beef-4fbc-a3e7-c3df71181a16	0.370083	0.460198	0.830281	7.5818	0.578157	9.08229	2.27951	3.23047	5.50998	10.7818	0.82218
	9a7a5aae397ea3f5a973d299a2ea9dd33bbd35b1201008ad5e8fec4bb41c0395	45	7.81227	9.42517	0.718726	0.595732	13.7035	4.95562	36.6545	43af3db3-d16a-4684-9da3-adad00361956	2.2392	1.43956	3.67876	6.70346	0.511179	66.6035	6.04779	4.12563	10.1734	9.40286	0.717025
	9a7a5aae397ea3f5a973d299a2ea9dd33bbd35b1201008ad5e8fec4bb41c0395	46	12.0665	11.2508	0.857939	0.920143	13.1331	4.67244	36.6545	40b88dd2-333a-49f4-950c-7a5d88b16724	0.356385	1.37662	1.73301	7.74348	0.590487	36.3292	4.56241	3.70429	8.2667	10.1221	0.771868
	9a7a5aae397ea3f5a973d299a2ea9dd33bbd35b1201008ad5e8fec4bb41c0395	47	25.7398	16.5603	1.26282	1.96281	13.3447	4.95562	51.9273	c8795e9b-20b9-4617-a786-53d260d4e948	0.739779	1.36356	2.10333	14.6279	1.11546	178.186	20.7049	21.5256	42.2305	13.936	1.0627
	9a7a5aae397ea3f5a973d299a2ea9dd33bbd35b1201008ad5e8fec4bb41c0395	48	8.8632	8.75722	0.66779	0.675872	11.0375	4.24767	38.1818	b7ec4c90-c4f0-46d4-9de6-028f13ad436e	0.416484	1.13062	1.5471	5.91732	0.451231	16.8671	2.47813	4.54979	7.02793	7.93709	0.60525
	9a7a5aae397ea3f5a973d299a2ea9dd33bbd35b1201008ad5e8fec4bb41c0395	49	13.1063	10.5009	0.800756	0.999436	14.2509	4.24767	67.2	9d58047b-3a90-4d05-9f15-9d4120a5ac21	0.35717	0.474361	0.831531	8.61957	0.657294	51.6826	2.76503	10.335	13.1	9.67392	0.737695
	9a7a5aae397ea3f5a973d299a2ea9dd33bbd35b1201008ad5e8fec4bb41c0395	50	24.2368	8.43543	0.643252	1.8482	12.0934	6.22992	54.9818	677c60e7-c30e-47a3-bb6d-67d834286f8b	0.348483	3.46786	3.81635	7.20608	0.549507	73.9558	3.80939	13.3104	17.1198	5.61999	0.428558
	9a7a5aae397ea3f5a973d299a2ea9dd33bbd35b1201008ad5e8fec4bb41c0395	51	-0.568266	8.44188	0.643744	-0.0433337	14.2088	4.10608	33.6	3ee6b270-0620-4c49-86dc-4086448f5ca1	0.36353	1.09664	1.46017	4.57767	0.349075	17.5158	3.64818	3.53019	7.17837	6.63046	0.505612
	9a7a5aae397ea3f5a973d299a2ea9dd33bbd35b1201008ad5e8fec4bb41c0395	52	5.51942	9.08987	0.693157	0.420889	14.2935	3.96449	36.6545	a839df2d-cdb4-4ed8-b20a-beaccacecfba	0.419143	1.10487	1.52402	6.99129	0.533128	14.0559	2.41705	3.92897	6.34601	10.574	0.806328
	9a7a5aae397ea3f5a973d299a2ea9dd33bbd35b1201008ad5e8fec4bb41c0395	53	19.3357	10.8578	0.827973	1.47447	13.1481	5.23879	45.8182	778c96c2-8657-49f7-a686-23b7704a2e39	1.97043	0.923369	2.8938	7.87796	0.600742	106.609	12.9829	10.2534	23.2362	7.79422	0.594356
	9a7a5aae397ea3f5a973d299a2ea9dd33bbd35b1201008ad5e8fec4bb41c0395	54	0.72031	11.5856	0.883472	0.054928	14.9824	3.96449	58.0364	a0ce414f-f24b-49fd-ac37-79843ef9fcdf	0.776339	0.927217	1.70356	9.88515	0.753802	160.886	21.9073	24.0762	45.9834	9.26044	0.706164
	9a7a5aae397ea3f5a973d299a2ea9dd33bbd35b1201008ad5e8fec4bb41c0395	55	-5.12035	11.9781	0.913398	-0.390457	14.9755	5.0972	80.9455	8933afbc-6cfe-4831-8502-9cade621fbda	0.824429	0.511331	1.33576	9.86712	0.752427	173.861	7.09228	37.8885	44.9808	9.22865	0.70374
	9a7a5aae397ea3f5a973d299a2ea9dd33bbd35b1201008ad5e8fec4bb41c0395	56	10.0604	10.2063	0.778295	0.767165	15.1796	4.53085	41.2364	13d947ee-aa56-4e71-ba32-6d57c6ebb89d	1.37021	0.95812	2.32833	9.2496	0.705337	138.181	92.233	10.9893	103.222	8.57393	0.653814
	9a7a5aae397ea3f5a973d299a2ea9dd33bbd35b1201008ad5e8fec4bb41c0395	57	13.8175	11.0199	0.840332	1.05366	15.2975	3.8229	33.6	20e08680-c15f-406e-bbec-1a1d0814c936	0.365642	0.469881	0.835522	11.063	0.84362	9.73103	2.9202	4.61959	7.53978	11.219	0.855519
	9a7a5aae397ea3f5a973d299a2ea9dd33bbd35b1201008ad5e8fec4bb41c0395	58	16.6007	9.96864	0.760168	1.26591	14.5144	4.38926	45.8182	bee07130-8e68-4cdf-88ac-5c1e9565d656	0.71527	1.10722	1.82249	8.14911	0.621419	52.1151	31.1558	12.3181	43.4739	9.10315	0.69417
	9a7a5aae397ea3f5a973d299a2ea9dd33bbd35b1201008ad5e8fec4bb41c0395	59	14.1868	10.9793	0.837236	1.08183	14.9466	4.24767	41.2364	87f18dbd-293d-44a6-99d3-c8cb12f9232f	1.17617	0.956143	2.13231	7.99678	0.609802	130.396	47.9955	4.9015	52.897	9.12384	0.695747
	9a7a5aae397ea3f5a973d299a2ea9dd33bbd35b1201008ad5e8fec4bb41c0395	60	12.4007	10.0147	0.763682	0.945629	14.7846	4.53085	45.8182	dca7b60d-b393-4702-bd49-ab6e51557100	0.297311	0.575334	0.872646	7.5557	0.576168	16.8671	2.52868	7.68947	10.2181	7.51435	0.573014
	9a7a5aae397ea3f5a973d299a2ea9dd33bbd35b1201008ad5e8fec4bb41c0395	61	13.3884	17.8047	1.35772	1.02095	14.79	5.38038	47.3455	7469eeaa-e872-4447-8dd9-090aca3f25ce	0.8349	1.31951	2.15441	15.7369	1.20003	125.422	20.6458	13.3928	34.0386	13.7707	1.0501
	9a7a5aae397ea3f5a973d299a2ea9dd33bbd35b1201008ad5e8fec4bb41c0395	62	9.18193	9.2675	0.706703	0.700177	15.4555	3.39814	33.6	45561b0d-0e0e-4b92-84de-bb0869473c98	0.291526	0.758908	1.05043	5.69639	0.434384	8.6498	6.91256	3.72348	10.636	6.00902	0.458224
	9a7a5aae397ea3f5a973d299a2ea9dd33bbd35b1201008ad5e8fec4bb41c0395	63	0.130217	9.48497	0.723286	0.00992979	14.9605	4.24767	41.2364	b7366101-2897-469c-9d06-571a54100b62	2.67385	1.54291	4.21676	5.88811	0.449004	73.0908	4.42822	5.45696	9.88517	8.01413	0.611126
	9a7a5aae397ea3f5a973d299a2ea9dd33bbd35b1201008ad5e8fec4bb41c0395	64	5.52013	9.91036	0.755724	0.420943	14.4587	3.68131	36.6545	c78bc6ae-0593-4284-9fe7-6a5936ca1718	0.900081	0.698479	1.59856	8.41854	0.641964	27.2469	8.12612	7.52142	15.6475	8.46737	0.645688
	9a7a5aae397ea3f5a973d299a2ea9dd33bbd35b1201008ad5e8fec4bb41c0395	65	-0.0290934	9.39006	0.716048	-0.00221855	15.8554	3.8229	36.6545	d1eb1f8b-0b8d-4b1c-86a8-eb7d99e1bdd6	0.430885	0.389478	0.820362	6.529	0.497875	10.3798	2.00032	4.5484	6.54872	9.97921	0.760975
	9a7a5aae397ea3f5a973d299a2ea9dd33bbd35b1201008ad5e8fec4bb41c0395	66	8.83009	17.6854	1.34862	0.673347	15.5955	5.38038	36.6545	3cc2e2f0-e2c6-43f4-9f4e-ee0abcc55e49	0.844643	1.12147	1.96611	16.2654	1.24034	189.863	8.48338	4.60826	13.0916	17.4435	1.33017
	9a7a5aae397ea3f5a973d299a2ea9dd33bbd35b1201008ad5e8fec4bb41c0395	67	18.4366	12.7007	0.968503	1.4059	15.6504	5.23879	39.7091	d65c2e53-e163-47ee-8189-b2121ad04982	0.690822	0.815244	1.50607	10.9107	0.832006	129.747	19.5464	4.48652	24.0329	11.4995	0.876902
	9a7a5aae397ea3f5a973d299a2ea9dd33bbd35b1201008ad5e8fec4bb41c0395	68	-1.16181	8.80131	0.671152	-0.0885948	15.6818	6.22992	45.8182	ddc92cc1-2099-42ff-9c59-dab804d89a47	0.513676	1.71951	2.23318	7.4708	0.569693	65.7385	10.0718	12.0905	22.1622	7.59376	0.57907
	9a7a5aae397ea3f5a973d299a2ea9dd33bbd35b1201008ad5e8fec4bb41c0395	69	11.3956	11.0538	0.842915	0.868986	15.3592	4.38926	50.4	bc1108dd-5498-4603-90ea-9422d8405da0	0.331281	0.486454	0.817734	7.59439	0.579118	39.5728	3.86923	7.01119	10.8804	8.52397	0.650004
	9a7a5aae397ea3f5a973d299a2ea9dd33bbd35b1201008ad5e8fec4bb41c0395	70	6.69113	10.725	0.817847	0.510239	14.6613	3.68131	36.6545	03c652f7-ed71-405c-8e23-d7c4119535d8	0.305942	0.57025	0.876192	10.6971	0.815715	12.326	3.15898	5.14751	8.3065	9.91698	0.756229
	9a7a5aae397ea3f5a973d299a2ea9dd33bbd35b1201008ad5e8fec4bb41c0395	71	7.50104	18.2306	1.3902	0.571999	17.79	5.23879	135.927	f5851454-b723-44fb-9785-6bf381a33783	0.500545	1.06167	1.56222	16.8196	1.2826	514.663	440.053	11.5846	451.638	10.323	0.787187
	9a7a5aae397ea3f5a973d299a2ea9dd33bbd35b1201008ad5e8fec4bb41c0395	72	18.4047	16.4599	1.25517	1.40347	14.3219	6.79627	74.8364	dae02f11-3f25-40d7-b454-be606d31fb09	0.550559	1.21956	1.77012	14.4775	1.104	431.625	12.8206	17.3361	30.1566	12.5324	0.955669
	9a7a5aae397ea3f5a973d299a2ea9dd33bbd35b1201008ad5e8fec4bb41c0395	73	2.87258	15.507	1.1825	0.219051	16.1236	5.0972	59.5636	560fd493-8fa9-489d-8809-673d40ba3fa3	1.60229	0.765421	2.36771	12.356	0.942219	211.704	17.6407	16.1615	33.8023	13.2431	1.00986
	9a7a5aae397ea3f5a973d299a2ea9dd33bbd35b1201008ad5e8fec4bb41c0395	74	8.91952	10.5541	0.804814	0.680167	15.084	4.53085	35.1273	ef821450-95ae-47dc-8ffb-ce6f54fda368	0.399189	0.47356	0.872749	9.94843	0.758627	39.5728	5.23538	3.98442	9.21979	10.9918	0.838193
	9a7a5aae397ea3f5a973d299a2ea9dd33bbd35b1201008ad5e8fec4bb41c0395	75	11.5848	9.01645	0.687558	0.883413	15.1348	4.10608	47.3455	b6d03f44-9a10-44ef-8b86-e49ea1f9cce3	0.918802	0.874472	1.79327	8.63883	0.658762	36.9779	6.99699	5.6934	12.6904	8.82501	0.67296
	9a7a5aae397ea3f5a973d299a2ea9dd33bbd35b1201008ad5e8fec4bb41c0395	76	4.6675	11.7302	0.894498	0.355925	15.8098	5.23879	39.7091	85aed01b-5537-42b3-9481-783a87eb01e0	0.413594	0.602557	1.01615	10.374	0.791083	60.9811	15.2229	9.24241	24.4653	8.55203	0.652143
	9a7a5aae397ea3f5a973d299a2ea9dd33bbd35b1201008ad5e8fec4bb41c0395	77	14.0797	11.0756	0.84458	1.07366	15.9159	6.51309	59.5636	d8b38af9-f9aa-4875-8b5f-c567e48018a4	0.315787	2.63021	2.946	7.15403	0.545537	73.5233	2.9838	7.29177	10.2756	9.80493	0.747685
	9a7a5aae397ea3f5a973d299a2ea9dd33bbd35b1201008ad5e8fec4bb41c0395	78	12.3854	14.9978	1.14368	0.944461	17.7767	4.24767	44.2909	9773d530-e487-4c0c-9f62-614770a03f73	1.46599	0.89462	2.36061	13.2085	1.00723	110.285	21.7075	10.5054	32.2129	15.3464	1.17026
	9a7a5aae397ea3f5a973d299a2ea9dd33bbd35b1201008ad5e8fec4bb41c0395	79	8.601	9.36071	0.713811	0.655878	16.2404	3.39814	36.6545	e881cf05-d9d4-425a-aeff-c0676b1c975c	1.49813	0.495128	1.99326	6.41316	0.489042	42.1678	18.041	5.33499	23.376	7.96592	0.607449
	9a7a5aae397ea3f5a973d299a2ea9dd33bbd35b1201008ad5e8fec4bb41c0395	80	12.9327	16.0804	1.22623	0.9862	14.5976	7.36263	313.091	461a9a86-5187-464d-9c53-ae4163a64a83	1.36671	4.24216	5.60887	12.3991	0.945505	1371.43	23.6872	54.2014	77.8886	11.9097	0.908186
	9a7a5aae397ea3f5a973d299a2ea9dd33bbd35b1201008ad5e8fec4bb41c0395	81	7.65769	10.5679	0.805862	0.583945	18.8294	3.53973	41.2364	de3bcd9b-30a5-49ec-97ed-d07f2af48944	0.915785	0.759838	1.67562	9.28882	0.708328	18.3808	2.48779	5.87364	8.36143	12.6233	0.962604
	9a7a5aae397ea3f5a973d299a2ea9dd33bbd35b1201008ad5e8fec4bb41c0395	82	13.065	10.3048	0.785803	0.996281	14.6889	4.38926	35.1273	9fd9254f-95af-4fd3-b116-ec232a6366b2	0.912836	0.858885	1.77172	7.56764	0.577078	19.6783	4.51892	4.31718	8.8361	8.9917	0.685671
	9a7a5aae397ea3f5a973d299a2ea9dd33bbd35b1201008ad5e8fec4bb41c0395	83	1.26921	10.867	0.828677	0.0967849	15.0006	4.53085	38.1818	6bd49ab8-8fbf-47a8-b419-cf3e0220901b	0.326456	0.759057	1.08551	8.01647	0.611304	17.7321	3.02533	6.2893	9.31463	9.19679	0.701311
	9a7a5aae397ea3f5a973d299a2ea9dd33bbd35b1201008ad5e8fec4bb41c0395	84	23.6306	10.3034	0.785694	1.80198	18.7374	4.24767	36.6545	a3e0a393-6941-4332-815c-1be23e6f4c04	0.565651	0.425902	0.991553	8.00126	0.610144	52.98	6.95518	5.089	12.0442	8.63478	0.658454
	9a7a5aae397ea3f5a973d299a2ea9dd33bbd35b1201008ad5e8fec4bb41c0395	85	28.2137	10.7784	0.821919	2.15146	16.9522	4.10608	42.7636	08ca2969-f415-4842-9443-15a6972e43ef	0.598868	1.11473	1.71359	8.17531	0.623416	95.3641	57.6913	10.1215	67.8128	7.05799	0.538214
	9a7a5aae397ea3f5a973d299a2ea9dd33bbd35b1201008ad5e8fec4bb41c0395	86	11.3983	9.37116	0.714607	0.86919	15.7145	4.38926	39.7091	b353e754-8bc9-480d-9f0c-9bcfe58c8939	0.387214	1.0639	1.45112	7.9519	0.60638	29.6256	13.6626	5.68966	19.3523	8.68626	0.662379
	9a7a5aae397ea3f5a973d299a2ea9dd33bbd35b1201008ad5e8fec4bb41c0395	87	-1.31059	10.4742	0.798721	-0.0999407	15.7372	3.68131	45.8182	942933e6-457d-46af-9d6f-f91d15a74dd9	0.367833	0.408831	0.776664	9.30726	0.709735	16.6509	2.66533	4.52369	7.18902	10.9062	0.831665
	9a7a5aae397ea3f5a973d299a2ea9dd33bbd35b1201008ad5e8fec4bb41c0395	88	6.85218	11.476	0.875112	0.52252	16.6601	4.24767	36.6545	beb899e6-dcef-40b3-9e0c-ceb560cbe42a	0.559988	1.48169	2.04167	7.92752	0.604521	19.4621	2.79328	3.98284	6.77612	11.7753	0.897934
	9a7a5aae397ea3f5a973d299a2ea9dd33bbd35b1201008ad5e8fec4bb41c0395	89	1.61106	12.2084	0.930961	0.122853	18.8864	4.81403	45.8182	a7d8cbfd-16a9-4c5f-8a1c-6824067507d1	0.782997	0.558895	1.34189	10.1485	0.773887	69.6309	4.66943	6.92749	11.5969	10.9236	0.832987
	467afe9dac22dc45adf8f57c98e8cebe32630b9f02d20f3e453e87ce87cb526e	1	29.8601	24.3055	0.896364	1.10121	22.773	6.35572	41.2364	aa1bbabf-c3f5-4ed0-a8ad-97eba9ca3b92	0.926582	1.80574	2.73232	23.2568	0.857691	183.569	10.1955	6.86851	17.064	23.9668	0.883872
	467afe9dac22dc45adf8f57c98e8cebe32630b9f02d20f3e453e87ce87cb526e	2	20.8883	15.7578	0.581134	0.77034	23.0083	4.37839	38.1818	e0806a00-b30a-4b78-a31f-0b72bccd1443	0.435842	1.06906	1.5049	13.4253	0.495113	56.5159	4.93961	4.64881	9.58842	15.9646	0.588761
	467afe9dac22dc45adf8f57c98e8cebe32630b9f02d20f3e453e87ce87cb526e	3	21.2898	19.3889	0.715044	0.78515	23.7662	7.20315	47.3455	d919231a-ccc3-47b9-9739-9445d6b23880	1.13242	1.96898	3.10139	18.4571	0.680679	209.454	9.68261	8.93011	18.6127	18.9998	0.700696
	467afe9dac22dc45adf8f57c98e8cebe32630b9f02d20f3e453e87ce87cb526e	4	31.5615	15.4978	0.571543	1.16396	20.7412	5.50829	42.7636	595b79ea-a8d4-45b7-a0aa-6a6fdfc740d2	0.40634	1.80369	2.21003	11.6197	0.428524	151.859	37.0598	5.71708	42.7769	10.3358	0.381176
	467afe9dac22dc45adf8f57c98e8cebe32630b9f02d20f3e453e87ce87cb526e	5	5.56106	14.4212	0.53184	0.205087	20.4337	5.64953	36.6545	c26e03f6-9b71-44d3-b95b-0db09183c152	0.511852	1.32632	1.83817	13.3699	0.49307	67.9485	14.7185	5.16269	19.8812	14.0577	0.518436
	467afe9dac22dc45adf8f57c98e8cebe32630b9f02d20f3e453e87ce87cb526e	6	45.1655	36.1753	1.33411	1.66566	24.5109	5.22582	47.3455	5d203fb2-8078-4d6c-a6f8-e932ce341e98	0.707561	0.766671	1.47423	35.9178	1.32461	280.206	10.5953	5.22945	15.8247	33.8781	1.24939
	467afe9dac22dc45adf8f57c98e8cebe32630b9f02d20f3e453e87ce87cb526e	7	8.75524	15.0954	0.556705	0.322885	26.9349	3.53096	38.1818	9ce83ea3-e438-4544-b3b9-11f6e34b3873	0.428627	0.641952	1.07058	12.0323	0.443741	15.7468	3.28789	5.1485	8.43639	12.5025	0.461081
	467afe9dac22dc45adf8f57c98e8cebe32630b9f02d20f3e453e87ce87cb526e	8	4.55951	11.9498	0.440699	0.16815	23.9413	4.23715	47.3455	90635c56-1761-4a2e-a15d-441e2dfd7269	1.30932	3.0665	4.37582	8.26048	0.304639	113.247	16.669	6.60589	23.2749	10.0848	0.371919
	467afe9dac22dc45adf8f57c98e8cebe32630b9f02d20f3e453e87ce87cb526e	9	18.6882	20.3654	0.751057	0.689202	27.3074	4.51962	44.2909	c766113b-9e8c-4c86-96b8-e08440238344	0.509355	1.2256	1.73495	17.8155	0.657019	68.1642	3.9243	9.95239	13.8767	19.9202	0.734638
	467afe9dac22dc45adf8f57c98e8cebe32630b9f02d20f3e453e87ce87cb526e	10	30.3459	28.7942	1.0619	1.11913	27.026	5.50829	61.0909	b42dbfd5-2bec-4fdc-819b-220b6d6855ca	1.09874	1.15062	2.24936	23.3986	0.86292	208.16	17.8134	10.6376	28.4509	25.7264	0.948765
	467afe9dac22dc45adf8f57c98e8cebe32630b9f02d20f3e453e87ce87cb526e	11	15.6037	12.5496	0.462819	0.575452	25.1138	4.09591	56.5091	5bd842aa-8f8d-4539-9b35-31db1b6c3b8d	0.360144	0.554622	0.914766	11.2399	0.414518	44.6518	3.63416	15.0525	18.6867	10.424	0.384426
	467afe9dac22dc45adf8f57c98e8cebe32630b9f02d20f3e453e87ce87cb526e	12	17.1039	23.2719	0.858246	0.630776	26.7623	4.8021	35.1273	837a3c25-6f7c-4e76-b832-a590fbf6b9b2	0.611172	1.29548	1.90665	18.7547	0.691655	77.8711	5	3.34407	8.34407	25.1828	0.928718
	467afe9dac22dc45adf8f57c98e8cebe32630b9f02d20f3e453e87ce87cb526e	13	-0.000886369	14.4742	0.533795	-3.26885e-05	24.7286	4.37839	48.8727	9a5fd2d9-3b99-4ffe-9546-dd578d34e462	1.02812	1.10183	2.12995	10.0084	0.3691	41.8476	5.69183	13.6653	19.3572	10.3597	0.382056
	467afe9dac22dc45adf8f57c98e8cebe32630b9f02d20f3e453e87ce87cb526e	14	29.8194	27.5793	1.0171	1.09971	25.4709	5.50829	44.2909	76e72e33-6817-4432-bbff-951007ea688b	1.08723	0.732122	1.81936	21.8956	0.807491	172.999	8.58629	11.7537	20.34	21.8567	0.806055
	467afe9dac22dc45adf8f57c98e8cebe32630b9f02d20f3e453e87ce87cb526e	15	-4.70962	13.8841	0.512034	-0.173686	24.7495	3.81343	41.2364	b7a4a527-da19-40f0-bf33-20d579822b4a	1.13305	0.884948	2.018	11.3879	0.419974	48.966	6.42225	9.76504	16.1873	12.5907	0.464334
	467afe9dac22dc45adf8f57c98e8cebe32630b9f02d20f3e453e87ce87cb526e	16	19.6983	21.7156	0.800851	0.726457	26.1772	4.51962	38.1818	666e6bad-6f3e-4a18-8aef-0970e3d553d5	0.506091	1.0272	1.53329	20.1782	0.744153	68.5956	5.9944	6.08636	12.0808	21.0596	0.776658
	467afe9dac22dc45adf8f57c98e8cebe32630b9f02d20f3e453e87ce87cb526e	17	10.2504	19.731	0.727662	0.378024	25.3626	5.64953	41.2364	940a035f-ff54-4441-a0b5-716445bed79e	1.9877	0.685765	2.67346	17.154	0.632623	174.94	18.7324	10.1424	28.8747	17.3544	0.640013
	467afe9dac22dc45adf8f57c98e8cebe32630b9f02d20f3e453e87ce87cb526e	18	10.3093	11.8949	0.438674	0.380199	26.8102	3.53096	36.6545	6455151f-9606-4365-b7b4-9a8b97415027	0.302493	0.643317	0.94581	10.763	0.39693	11.864	5.50231	8.73317	14.2355	7.55945	0.278786
	467afe9dac22dc45adf8f57c98e8cebe32630b9f02d20f3e453e87ce87cb526e	19	27.0189	20.6659	0.762138	0.996431	25.6398	5.08458	36.6545	c949aed1-83c8-4f34-90f0-9a1067e540a7	1.09934	0.99504	2.09438	17.3041	0.638159	72.0469	9.5758	4.97397	14.5498	19.9435	0.735497
	467afe9dac22dc45adf8f57c98e8cebe32630b9f02d20f3e453e87ce87cb526e	20	22.6925	13.0588	0.481596	0.836877	26.2108	5.22582	48.8727	f5f05fb5-a666-46dd-a12c-d57d73d0a5bf	0.416902	2.00278	2.41968	9.69385	0.3575	44.2204	3.14328	19.1628	22.3061	11.7021	0.431563
	467afe9dac22dc45adf8f57c98e8cebe32630b9f02d20f3e453e87ce87cb526e	21	22.7328	12.8358	0.473374	0.838366	25.83	4.37839	50.4	e34420c8-67e5-44a1-816a-b26fdb848b07	0.852765	1.15056	2.00333	8.44077	0.311288	57.3787	5.60747	22.9272	28.5347	7.66095	0.282529
	467afe9dac22dc45adf8f57c98e8cebe32630b9f02d20f3e453e87ce87cb526e	22	27.0236	18.089	0.667104	0.996605	27.5004	4.8021	36.6545	b4008927-4f16-4cbf-8a24-4b21df05cc9d	0.414744	1.42908	1.84383	16.6138	0.612703	62.7714	13.2683	4.63751	17.9058	15.8855	0.585843
	467afe9dac22dc45adf8f57c98e8cebe32630b9f02d20f3e453e87ce87cb526e	23	19.6859	12.7966	0.471928	0.725996	24.0839	4.37839	45.8182	fbe44895-fbe1-46e3-9124-6ed9038492eb	1.58418	1.73524	3.31943	11.7375	0.432869	63.4186	14.7385	7.21429	21.9528	11.0158	0.406252
	467afe9dac22dc45adf8f57c98e8cebe32630b9f02d20f3e453e87ce87cb526e	24	11.0018	21.0624	0.776761	0.405738	27.1205	5.22582	41.2364	dd4c322f-b570-4e0b-a80d-a8e8400d2ffb	0.528677	1.21524	1.74392	18.4869	0.681782	162.861	37.1846	9.60739	46.792	17.6272	0.650075
	467afe9dac22dc45adf8f57c98e8cebe32630b9f02d20f3e453e87ce87cb526e	25	25.8613	14.461	0.533309	0.95374	27.6374	6.21448	44.2909	26c5dc8c-da68-4379-9b7b-b433ec6b9a7b	0.567875	1.53582	2.10369	12.2012	0.449968	102.893	4.78017	9.61736	14.3975	13.2547	0.48882
	467afe9dac22dc45adf8f57c98e8cebe32630b9f02d20f3e453e87ce87cb526e	26	10.2796	13.4316	0.495344	0.379101	29.9786	3.81343	41.2364	5d38f16b-06ba-4429-a731-08dcf4e6042f	0.522375	0.904408	1.42678	10.9458	0.40367	30.1993	4.26735	4.14371	8.41106	14.1353	0.521296
	467afe9dac22dc45adf8f57c98e8cebe32630b9f02d20f3e453e87ce87cb526e	27	37.0634	26.8614	0.990625	1.36686	28.0464	5.36705	36.6545	3d8c3d72-2ee8-4fe8-bf74-9fdcdc83dc17	0.644896	1.25578	1.90067	24.9585	0.920447	140.427	11.9444	4.24309	16.1875	27.1468	1.00115
	467afe9dac22dc45adf8f57c98e8cebe32630b9f02d20f3e453e87ce87cb526e	28	24.3926	19.3137	0.71227	0.899576	27.1648	5.22582	47.3455	c39f30f9-37e2-4ca5-8241-dcaf8590aa34	1.1311	0.774022	1.90512	15.9555	0.588423	67.517	2.9875	8.81723	11.8047	20.3387	0.750074
	467afe9dac22dc45adf8f57c98e8cebe32630b9f02d20f3e453e87ce87cb526e	29	16.62	13.2986	0.490439	0.61293	27.0727	4.8021	36.6545	a3c134ed-9808-4a86-a8a1-3ca38f347f39	1.98825	0.689079	2.67733	10.1145	0.373014	94.4807	23.7322	4.64791	28.3801	11.1867	0.412554
	467afe9dac22dc45adf8f57c98e8cebe32630b9f02d20f3e453e87ce87cb526e	30	-6.21668	15.358	0.566389	-0.229266	29.3174	3.95467	38.1818	18c0590b-a942-40a1-88f4-5173dc79e696	0.887361	1.07722	1.96458	12.9224	0.476568	44.4361	8.61424	6.32986	14.9441	13.0916	0.482806
	467afe9dac22dc45adf8f57c98e8cebe32630b9f02d20f3e453e87ce87cb526e	31	5.39533	13.166	0.48555	0.198975	31.401	5.36705	38.1818	3108fe7d-1438-4d94-8993-2565c120831b	0.684599	0.807321	1.49192	8.7419	0.322393	37.9648	9.8357	5.66772	15.5034	10.093	0.372219
	467afe9dac22dc45adf8f57c98e8cebe32630b9f02d20f3e453e87ce87cb526e	32	34.0741	21.343	0.787111	1.25662	30.9709	4.51962	35.1273	b629e6dc-f9d7-4c5f-b03c-9010d8cf38f1	0.455606	0.627177	1.08278	20.8885	0.77035	32.5721	6.76296	3.61556	10.3785	20.8701	0.769671
	467afe9dac22dc45adf8f57c98e8cebe32630b9f02d20f3e453e87ce87cb526e	33	33.2942	16.9454	0.62493	1.22786	29.5641	5.50829	58.0364	4e17a2b3-19e6-4c3b-b3cb-baee75230b18	0.581176	0.73408	1.31526	14.4078	0.531345	190.04	59.97	24.7099	84.6798	11.7134	0.431979
	467afe9dac22dc45adf8f57c98e8cebe32630b9f02d20f3e453e87ce87cb526e	34	9.14304	13.0376	0.480815	0.337187	32.7419	4.23715	38.1818	cb28ee95-4ec3-4072-b1c4-81eca0f5100c	0.302677	1.28768	1.59036	9.90457	0.365272	16.8253	4.3539	4.75815	9.11205	11.2999	0.41673
	467afe9dac22dc45adf8f57c98e8cebe32630b9f02d20f3e453e87ce87cb526e	35	23.4849	19.9159	0.734482	0.8661	30.4812	4.51962	33.6	966c9d84-a8a7-473e-9423-2622f1c577ed	0.466683	0.678334	1.14502	15.5495	0.573453	43.5733	4.41013	3.00123	7.41136	19.97	0.736475
	467afe9dac22dc45adf8f57c98e8cebe32630b9f02d20f3e453e87ce87cb526e	36	16.9516	15.243	0.562149	0.625161	30.7198	4.51962	39.7091	58153b8d-27c7-462c-aaf0-053ee6484c72	0.871452	1.2551	2.12655	12.596	0.464527	68.3799	6.00932	4.56482	10.5741	14.2008	0.523714
	467afe9dac22dc45adf8f57c98e8cebe32630b9f02d20f3e453e87ce87cb526e	37	15.5078	16.9663	0.625703	0.571913	33.5557	6.49696	62.6182	4b2e0609-6656-4a28-beca-d86d592e8880	0.469124	0.992017	1.46114	15.4751	0.570706	143.015	5.85018	10.1992	16.0494	16.1323	0.594943
	467afe9dac22dc45adf8f57c98e8cebe32630b9f02d20f3e453e87ce87cb526e	38	20.5469	18.1379	0.66891	0.75775	32.1901	4.51962	47.3455	d29bf9e1-a932-406d-8dd3-a6d35383b66d	0.445538	0.484386	0.929924	17.152	0.632549	69.8898	4.89975	7.86868	12.7684	16.7294	0.616964
	9b490046284270a293ff5af85f8c6703903e52c3323911a2ad5ba7684a8c0c19	1	7.67051	6.58249	0.560322	0.652938	7.33215	4.5393	42.7636	bf543ee3-0049-4043-88f7-e2e38b93f179	0.514037	0.526107	1.04014	5.39874	0.459558	33.5805	4.24642	12.3659	16.6124	5.61972	0.478368
	9b490046284270a293ff5af85f8c6703903e52c3323911a2ad5ba7684a8c0c19	2	1.58117	11.2039	0.953709	0.134594	9.49119	5.39041	39.7091	c29b4a9e-f73d-4424-8bc0-c9bb74fb2372	0.93098	0.773844	1.70482	12.9239	1.10012	67.5942	4.6471	6.21182	10.8589	14.2051	1.20918
	9b490046284270a293ff5af85f8c6703903e52c3323911a2ad5ba7684a8c0c19	3	11.8505	7.15654	0.609187	1.00875	10.0168	3.54632	35.1273	66ef59d7-fe9e-4b37-bbed-4d1fc1dd9ad4	0.331556	0.709975	1.04153	5.63835	0.479954	9.96582	3.02913	4.04753	7.07666	5.8991	0.50215
	9b490046284270a293ff5af85f8c6703903e52c3323911a2ad5ba7684a8c0c19	4	18.03	12.4062	1.05606	1.53477	9.46028	4.5393	41.2364	b1ac90b9-3cfe-40ae-8dc9-9c54851aef1a	0.820065	1.37282	2.19289	11.2726	0.959562	127.606	6.99366	9.14447	16.1381	11.9972	1.02124
	9b490046284270a293ff5af85f8c6703903e52c3323911a2ad5ba7684a8c0c19	5	2.75185	7.89329	0.671902	0.234246	10.4222	5.95783	44.2909	75c93dd6-1e30-4611-93ff-7092e93acc4a	0.398221	3.44446	3.84268	5.39044	0.458851	72.7938	10.2095	7.36312	17.5726	6.21748	0.529252
	9b490046284270a293ff5af85f8c6703903e52c3323911a2ad5ba7684a8c0c19	6	0.804514	9.04742	0.770145	0.0684827	10.4167	3.40447	35.1273	eea12f17-d889-4b47-b432-ba6c11782234	0.292079	0.396597	0.688676	8.4531	0.719554	8.66593	3.63983	5.08947	8.7293	6.54267	0.556932
	9b490046284270a293ff5af85f8c6703903e52c3323911a2ad5ba7684a8c0c19	7	10.4089	9.84954	0.838423	0.886036	9.50171	4.5393	45.8182	d7e96056-e489-4d24-ac85-023a20e96f1f	0.405811	1.24093	1.64674	8.50787	0.724217	62.178	7.75692	16.7608	24.5177	7.03649	0.598968
	9b490046284270a293ff5af85f8c6703903e52c3323911a2ad5ba7684a8c0c19	8	0.37591	13.1287	1.11755	0.0319986	9.4958	5.39041	38.1818	28639419-e729-4f40-8247-fca2cf9bbfd5	1.30179	0.587483	1.88928	12.8523	1.09403	125.656	10.2877	5.37723	15.6649	14.3219	1.21913
	9b490046284270a293ff5af85f8c6703903e52c3323911a2ad5ba7684a8c0c19	9	11.0129	10.7186	0.912402	0.937448	12.2031	4.25559	41.2364	1849f339-d239-4d55-8e55-46146ed5d7f1	0.81811	1.41045	2.22856	8.31093	0.707452	61.3114	7.30668	6.02899	13.3357	9.57991	0.815472
	9b490046284270a293ff5af85f8c6703903e52c3323911a2ad5ba7684a8c0c19	10	20.0131	22.3228	1.90019	1.70358	15.1722	4.39744	36.6545	379e670b-b97b-49fb-bbe0-c329514215b0	0.551622	0.892612	1.44423	20.754	1.76664	61.5281	4.63843	5.85201	10.4904	22.3336	1.90111
	9b490046284270a293ff5af85f8c6703903e52c3323911a2ad5ba7684a8c0c19	11	9.81715	14.4602	1.2309	0.835667	15.1653	4.39744	44.2909	c02f9395-f26a-4d6b-b881-a20cfb47104d	0.53021	1.50716	2.03737	10.2357	0.871296	68.2442	13.1294	11.6857	24.8151	10.5965	0.902009
	9b490046284270a293ff5af85f8c6703903e52c3323911a2ad5ba7684a8c0c19	12	31.9035	22.4262	1.90899	2.71573	11.6012	5.95783	39.7091	73e0a859-776a-4ce2-8f2f-b3a7223ec818	0.775911	1.13791	1.91382	21.2324	1.80737	185.884	18.0621	6.50905	24.5712	20.3157	1.72934
	9b490046284270a293ff5af85f8c6703903e52c3323911a2ad5ba7684a8c0c19	13	20.1611	8.28615	0.705343	1.71618	11.7593	3.68818	35.1273	fe667442-aa23-4ec1-a3e4-ba6dfe198cb3	0.34058	0.446024	0.786603	6.39049	0.543979	8.88258	2.45014	4.50692	6.95707	6.02233	0.51264
	9b490046284270a293ff5af85f8c6703903e52c3323911a2ad5ba7684a8c0c19	14	9.39469	7.68512	0.654181	0.799705	13.3297	3.97188	47.3455	c717d876-24db-405e-96f1-dc65520e3225	0.562356	1.18102	1.74337	6.42629	0.547026	36.6135	42.9743	7.36503	50.3394	6.62536	0.563972
	9b490046284270a293ff5af85f8c6703903e52c3323911a2ad5ba7684a8c0c19	15	11.7753	10.8869	0.92673	1.00235	12.2975	3.83003	54.9818	068ed97f-b197-48ae-9847-2d87be9c7b2e	0.791593	0.587542	1.37914	8.78938	0.748179	45.4961	4.33409	6.81473	11.1488	8.57263	0.729729
	9b490046284270a293ff5af85f8c6703903e52c3323911a2ad5ba7684a8c0c19	16	7.32422	15.7086	1.33716	0.623461	14.8094	5.95783	38.1818	91f1e802-6cf5-42e7-a85e-f19acf641438	0.427483	0.763227	1.19071	16.144	1.37423	68.2442	7.92539	7.23151	15.1569	14.8567	1.26465
	9b490046284270a293ff5af85f8c6703903e52c3323911a2ad5ba7684a8c0c19	17	4.11789	11.4005	0.970448	0.350528	10.4053	4.11374	38.1818	d733e178-519f-4be3-9b2b-0c3237f27001	0.528189	0.855017	1.38321	10.5927	0.901684	39.8633	6.33498	7.75366	14.0886	11.1618	0.950124
	9b490046284270a293ff5af85f8c6703903e52c3323911a2ad5ba7684a8c0c19	18	14.8831	18.3	1.55775	1.2669	9.95758	5.24856	38.1818	abfa00f4-dc03-4227-a42a-500c97a3c1ee	0.590795	1.19219	1.78299	15.3122	1.30342	103.558	13.0842	6.12756	19.2118	15.9381	1.3567
	9b490046284270a293ff5af85f8c6703903e52c3323911a2ad5ba7684a8c0c19	19	11.4143	9.1621	0.779907	0.971623	11.0178	4.68115	47.3455	22908ffa-d0ca-48db-81b0-67d809acc9d7	1.03425	1.53557	2.56982	5.85152	0.4981	57.1951	4.39513	5.99763	10.3928	8.75228	0.745021
	9b490046284270a293ff5af85f8c6703903e52c3323911a2ad5ba7684a8c0c19	20	10.7445	8.62446	0.734141	0.914605	12.4476	3.83003	33.6	1a409018-69d9-45a9-9473-a3dbf23dc5a6	0.396886	0.874456	1.27134	6.08073	0.517611	12.9989	2.18194	3.41403	5.59598	11.0585	0.941334
	9b490046284270a293ff5af85f8c6703903e52c3323911a2ad5ba7684a8c0c19	21	32.8051	17.8107	1.5161	2.79247	10.2117	4.96485	41.2364	5b3d6a6b-eabf-4278-93da-02aaa4548333	0.455012	0.797455	1.25247	16.5488	1.40869	92.5088	5.15613	8.88035	14.0365	16.1462	1.37442
	9b490046284270a293ff5af85f8c6703903e52c3323911a2ad5ba7684a8c0c19	22	26.4938	21.19	1.80376	2.25523	13.1558	4.823	44.2909	0b6287c3-73d7-4a03-8461-e6a269a910fa	1.17005	0.835711	2.00576	19.1838	1.63298	194.333	6.75414	7.01544	13.7696	20.5946	1.75307
	9b490046284270a293ff5af85f8c6703903e52c3323911a2ad5ba7684a8c0c19	23	11.7172	10.2724	0.874421	0.997407	11.4643	4.5393	35.1273	45ad8ed9-33e4-49a2-8584-bce066e18b17	0.428081	1.87509	2.30317	6.50088	0.553375	27.2977	3.45502	4.10783	7.56285	8.77006	0.746535
	9b490046284270a293ff5af85f8c6703903e52c3323911a2ad5ba7684a8c0c19	24	4.75124	11.8513	1.00882	0.404441	16.4194	4.5393	36.6545	9ad7ef54-ab87-4195-9c74-f12a190166d9	0.439772	0.961985	1.40176	12.2886	1.04604	42.463	5.17399	3.27579	8.44978	14.6969	1.25105
	9b490046284270a293ff5af85f8c6703903e52c3323911a2ad5ba7684a8c0c19	25	25.1606	21.2418	1.80817	2.14175	12.4192	5.53227	42.7636	b7640622-86cb-4363-84e1-a9dbceeb1729	1.04377	1.24705	2.29081	18.3819	1.56473	153.387	15.5701	8.82218	24.3923	18.4776	1.57287
	9b490046284270a293ff5af85f8c6703903e52c3323911a2ad5ba7684a8c0c19	26	24.0221	11.4585	0.975385	2.04484	15.4804	4.5393	36.6545	6800b067-2b80-4c82-8779-c519b4df943b	0.480522	0.491954	0.972476	9.10626	0.775153	64.5612	4.88315	4.05116	8.93431	10.0729	0.857438
	9b490046284270a293ff5af85f8c6703903e52c3323911a2ad5ba7684a8c0c19	27	1.22137	8.02706	0.683288	0.103967	12.1198	3.54632	33.6	e3380d66-6bcd-42c4-9c88-c26e51af0d5d	0.322992	0.509693	0.832685	5.91605	0.503593	11.699	3.76987	3.4122	7.18207	7.2813	0.619807
	9b490046284270a293ff5af85f8c6703903e52c3323911a2ad5ba7684a8c0c19	28	10.8363	10.3974	0.885055	0.922418	17.2569	3.68818	35.1273	7e7cb98c-f593-4951-9ce2-09c4579d5a72	0.342807	0.755065	1.09787	10.7112	0.911771	34.6637	47.7731	4.37453	52.1476	8.22904	0.700482
	9b490046284270a293ff5af85f8c6703903e52c3323911a2ad5ba7684a8c0c19	29	13.2616	8.76681	0.746258	1.12887	13.9926	4.823	48.8727	5ea70fa6-ddad-469f-8cf4-b52f71ff1dc1	1.51178	2.11265	3.62443	6.42558	0.546966	62.3947	9.2741	21.1512	30.4253	6.79788	0.578657
	9b490046284270a293ff5af85f8c6703903e52c3323911a2ad5ba7684a8c0c19	30	13.2054	12.6875	1.08	1.12409	13.6488	3.68818	42.7636	124730dc-fb43-48ce-a4ce-e9f6fb7d44db	1.70969	0.759791	2.46949	9.109	0.775387	55.6786	3.48348	6.7545	10.238	11.3535	0.966445
	9b490046284270a293ff5af85f8c6703903e52c3323911a2ad5ba7684a8c0c19	31	-5.12073	9.19889	0.783038	-0.435892	14.3699	3.40447	42.7636	7b37a800-e962-4c6b-b37f-63d118776721	2.38327	0.517048	2.90032	7.09475	0.603927	55.8952	13.0103	7.81205	20.8223	8.5647	0.729054
	9b490046284270a293ff5af85f8c6703903e52c3323911a2ad5ba7684a8c0c19	32	13.6494	13.0341	1.1095	1.16188	13.4136	5.81597	195.491	9b9ba8d8-ef53-4536-9c12-72e703b54161	0.842196	0.647635	1.48983	11.4459	0.974307	805.715	130.665	163.255	293.92	8.05592	0.685745
	9b490046284270a293ff5af85f8c6703903e52c3323911a2ad5ba7684a8c0c19	33	2.18496	8.34529	0.710377	0.185991	13.0689	4.68115	44.2909	e7113859-33e4-44db-bfd5-3a5260f53877	0.759357	0.442202	1.20156	7.98915	0.680062	62.3947	15.9478	9.21186	25.1597	8.16071	0.694665
	9b490046284270a293ff5af85f8c6703903e52c3323911a2ad5ba7684a8c0c19	34	21.9317	20.6227	1.75547	1.86689	13.6881	5.81597	38.1818	b3a43611-9bfd-4bdf-b3a4-9e5945852d33	1.18098	1.33393	2.51491	16.8127	1.43115	289.009	71.0948	8.50367	79.5984	16.8339	1.43295
	9b490046284270a293ff5af85f8c6703903e52c3323911a2ad5ba7684a8c0c19	35	27.3307	12.4073	1.05615	2.32647	11.8282	5.24856	44.2909	855587f5-1582-4341-b8b0-03556f5ae84e	0.539855	0.794244	1.3341	11.5206	0.980667	299.841	121.148	6.12838	127.276	9.18537	0.781887
	9b490046284270a293ff5af85f8c6703903e52c3323911a2ad5ba7684a8c0c19	36	25.8354	11.6333	0.990265	2.19919	14.9186	5.24856	51.9273	0be014fb-09e4-42ff-89c8-5e32849289d0	1.62551	2.4329	4.05841	6.89061	0.58655	110.057	4.67784	20.1406	24.8184	9.41993	0.801854
	9b490046284270a293ff5af85f8c6703903e52c3323911a2ad5ba7684a8c0c19	37	10.1828	13.3175	1.13363	0.866796	15.6619	5.67412	35.1273	4ded99d9-96b3-434b-bc16-719aad80044b	0.415752	0.623344	1.0391	10.5235	0.895789	55.2453	5.72988	4.0144	9.74428	11.3771	0.968454
	9b490046284270a293ff5af85f8c6703903e52c3323911a2ad5ba7684a8c0c19	38	16.2917	15.8076	1.34559	1.3868	20.1452	3.97188	35.1273	a947f57e-77d5-483e-8a2c-1b18feb444e7	0.340074	0.869727	1.2098	14.4802	1.2326	22.9647	7.16582	3.47301	10.6388	13.9629	1.18856
	9b490046284270a293ff5af85f8c6703903e52c3323911a2ad5ba7684a8c0c19	39	25.5147	9.61125	0.81814	2.17189	15.2686	3.54632	36.6545	0d355cff-5de6-44a2-856a-caf159f9c6cd	0.901404	1.05382	1.95523	6.12832	0.521662	26.4311	16.2383	4.44689	20.6852	6.67538	0.568229
	9b490046284270a293ff5af85f8c6703903e52c3323911a2ad5ba7684a8c0c19	40	14.2946	14.237	1.2119	1.2168	12.0158	5.10671	45.8182	5913f48f-fdee-4058-88d4-165c2d525d48	1.47434	0.847691	2.32203	11.6792	0.994171	170.285	17.0897	6.47977	23.5695	12.5311	1.06669
	9b490046284270a293ff5af85f8c6703903e52c3323911a2ad5ba7684a8c0c19	41	9.79602	7.65188	0.651352	0.833868	12.03	3.40447	44.2909	2eb45b61-82ce-4d4f-8115-0449ca10ca2e	0.631669	0.409875	1.04154	6.93401	0.590245	16.8986	2.11247	4.86196	6.97442	10.3073	0.877391
	9b490046284270a293ff5af85f8c6703903e52c3323911a2ad5ba7684a8c0c19	42	24.3223	13.8786	1.18139	2.07039	15.892	4.68115	56.5091	36c1a47a-c48f-473b-807a-149c99ffad95	0.768066	0.793632	1.5617	9.78861	0.833237	139.088	7.66033	6.57254	14.2329	10.5743	0.900117
	9b490046284270a293ff5af85f8c6703903e52c3323911a2ad5ba7684a8c0c19	43	16.0064	12.5817	1.071	1.36251	14.2879	3.97188	62.6182	2af1cec5-00a6-4b04-98f0-48ca9076a36d	1.45901	1.0144	2.47341	7.88448	0.671152	102.908	13.5784	31.8065	45.3849	8.4055	0.715502
	9b490046284270a293ff5af85f8c6703903e52c3323911a2ad5ba7684a8c0c19	44	9.44199	11.6967	0.99566	0.803732	21.0194	3.40447	42.7636	e6180eaa-b644-4337-9488-31a3a31834ea	0.523601	0.502192	1.02579	10.2141	0.869459	17.7652	2.90747	4.62625	7.53372	13.792	1.17401
	9b490046284270a293ff5af85f8c6703903e52c3323911a2ad5ba7684a8c0c19	45	4.50134	8.65324	0.736591	0.383168	16.7926	3.83003	41.2364	77f70128-a870-4f48-bdc9-71e6382ef177	0.382305	0.509943	0.892248	8.23266	0.70079	21.4482	4.09607	10.069	14.1651	8.06967	0.686916
	9b490046284270a293ff5af85f8c6703903e52c3323911a2ad5ba7684a8c0c19	46	13.7044	13.4418	1.14421	1.16656	15.2537	6.24153	58.0364	40975aa7-a180-49f1-a030-86a08da4c60e	0.552636	0.81231	1.36495	13.5782	1.15582	240.48	32.6396	22.9827	55.6223	12.205	1.03893
	9b490046284270a293ff5af85f8c6703903e52c3323911a2ad5ba7684a8c0c19	47	25.6253	14.3843	1.22444	2.18131	15.3113	6.09968	87.0545	17b0f8ca-fe5b-4fbb-9fb8-1554dff32a99	2.08589	0.96176	3.04765	10.2115	0.869233	508.69	99.1857	54.8131	153.999	8.66292	0.737415
	9b490046284270a293ff5af85f8c6703903e52c3323911a2ad5ba7684a8c0c19	48	8.2897	11.7154	0.997248	0.705645	21.5306	3.68818	33.6	f0f1a8da-262d-4eeb-afa8-f4ccb8aa9af8	0.448179	0.571867	1.02005	9.62299	0.819139	11.9157	2.80501	2.72768	5.53268	13.6669	1.16337
	c7a853c2abef3faa98ad0a21067536a18ce2266b846a91add8f0b55cc15fa70c	1	16.6111	8.30177	0.787351	1.57542	10.8233	4.5949	42.7636	7f8c4968-8bc7-4c61-8a7b-e0d4f07762f4	0.378082	1.53605	1.91413	6.60945	0.626849	33.3871	12.8738	6.2301	19.1039	6.81251	0.646107
	c7a853c2abef3faa98ad0a21067536a18ce2266b846a91add8f0b55cc15fa70c	2	6.62172	8.5064	0.806758	0.628012	10.9773	3.62023	36.6545	aabf8414-3da6-4765-817e-613b05b21b49	0.32375	0.465234	0.788984	6.75855	0.64099	8.71892	2.2108	4.45274	6.66354	8.24918	0.782363
	c7a853c2abef3faa98ad0a21067536a18ce2266b846a91add8f0b55cc15fa70c	3	7.77811	8.03733	0.762271	0.737686	10.8647	3.89871	35.1273	82bfa6dc-084f-4375-a7aa-0c19cbd300cb	0.299542	0.656684	0.956226	6.81758	0.646588	9.14424	2.63007	3.31845	5.94852	7.89701	0.748963
	c7a853c2abef3faa98ad0a21067536a18ce2266b846a91add8f0b55cc15fa70c	4	19.714	14.2682	1.35322	1.8697	10.7788	5.56958	50.4	6d7b8bd8-f364-4735-bc7e-7b462a3b3c13	0.695849	1.43537	2.13122	11.9473	1.1331	109.306	4.02727	13.1478	17.175	12.8741	1.22099
	c7a853c2abef3faa98ad0a21067536a18ce2266b846a91add8f0b55cc15fa70c	5	10.6768	11.4464	1.08559	1.0126	10.1634	6.40502	50.4	84a4f42d-a383-454b-9351-68b05dda5d69	0.577282	0.790297	1.36758	11.6089	1.10101	212.869	12.9821	6.43623	19.4183	11.6633	1.10616
	c7a853c2abef3faa98ad0a21067536a18ce2266b846a91add8f0b55cc15fa70c	6	4.1265	12.257	1.16247	0.391363	10.6072	5.01262	50.4	8ef5e7f5-639c-4181-ba6f-6cb3aaa70423	1.89283	0.684091	2.57692	9.70845	0.920762	140.991	23.3107	11.5764	34.8872	10.4976	0.995607
	c7a853c2abef3faa98ad0a21067536a18ce2266b846a91add8f0b55cc15fa70c	7	13.483	11.1013	1.05287	1.27874	9.66345	4.5949	54.9818	cf05927d-1999-4c51-8239-d0b186358910	2.07751	0.968795	3.04631	8.25753	0.783155	99.736	4.18517	22.9082	27.0934	9.59542	0.910042
	c7a853c2abef3faa98ad0a21067536a18ce2266b846a91add8f0b55cc15fa70c	8	1.07306	9.38465	0.890053	0.10177	10.3042	3.75947	38.1818	8544efe6-f416-4640-b692-59adfd550431	0.447719	0.472574	0.920292	6.66793	0.632396	11.2708	2.60233	5.65343	8.25576	9.74447	0.924179
	c7a853c2abef3faa98ad0a21067536a18ce2266b846a91add8f0b55cc15fa70c	9	15.4283	12.1862	1.15575	1.46324	11.2047	5.2911	36.6545	19f8b26a-e9a6-4df0-814f-1b9a586247ec	0.817748	0.767099	1.58485	12.0728	1.145	72.9412	19.5966	5.55766	25.1542	12.5975	1.19476
	c7a853c2abef3faa98ad0a21067536a18ce2266b846a91add8f0b55cc15fa70c	10	11.641	9.09672	0.862745	1.10405	10.5005	4.5949	35.1273	e6e878ee-21fa-412c-9c8a-cf460216470a	1.01648	0.759472	1.77595	8.17497	0.775325	43.1693	11.2118	3.89213	15.104	10.8862	1.03246
	c7a853c2abef3faa98ad0a21067536a18ce2266b846a91add8f0b55cc15fa70c	11	36.7943	28.9213	2.74293	3.48962	10.5107	6.54425	41.2364	53d0dc91-2cbd-4325-ab33-e33b8b822d1a	0.758706	1.22738	1.98609	24.5751	2.33073	336.848	44.9325	6.46916	51.4016	24.5315	2.3266
	c7a853c2abef3faa98ad0a21067536a18ce2266b846a91add8f0b55cc15fa70c	12	7.17863	7.27527	0.689997	0.68083	10.1588	4.03794	38.1818	d6778a0c-0b94-4207-9278-ac7a0aa20015	0.493906	0.926825	1.42073	5.28962	0.501675	16.7999	2.39918	8.17311	10.5723	7.28167	0.690603
	c7a853c2abef3faa98ad0a21067536a18ce2266b846a91add8f0b55cc15fa70c	13	9.14166	13.8471	1.31328	0.867007	11.1866	6.54425	41.2364	d5002c5c-8190-4951-b8ac-ebcf1feb9036	1.4015	1.44522	2.84672	13.1745	1.24948	304.737	31.7818	9.39149	41.1733	13.1334	1.24559
	c7a853c2abef3faa98ad0a21067536a18ce2266b846a91add8f0b55cc15fa70c	14	8.73978	7.9592	0.754862	0.828893	10.3844	4.31642	58.0364	827d70a7-48fe-4a57-ac41-696de39ee476	3.37736	3.05654	6.4339	3.67999	0.349015	55.0781	3.67789	8.74709	12.425	7.16484	0.679523
	c7a853c2abef3faa98ad0a21067536a18ce2266b846a91add8f0b55cc15fa70c	15	18.6301	8.30491	0.787649	1.7669	10.1412	3.62023	38.1818	857218f9-2c0e-433e-a7ae-aff3d6c16024	0.378215	0.541017	0.919232	6.24612	0.59239	9.35689	2.55339	4.36821	6.9216	8.27834	0.785128
	c7a853c2abef3faa98ad0a21067536a18ce2266b846a91add8f0b55cc15fa70c	16	31.8559	9.03106	0.856518	3.02125	9.73089	3.62023	38.1818	e7602a4d-99e3-4197-91d9-53a87a60e234	0.409717	0.67849	1.08821	5.09238	0.482968	10.4202	2.24306	4.04812	6.29118	9.72313	0.922155
	c7a853c2abef3faa98ad0a21067536a18ce2266b846a91add8f0b55cc15fa70c	17	8.65637	12.9225	1.22559	0.820982	9.74377	4.45566	39.7091	c6d2fd58-2511-4012-beff-e0153e894025	0.968424	1.18142	2.14984	10.6328	1.00843	59.5439	6.4201	6.00931	12.4294	12.4324	1.1791
	c7a853c2abef3faa98ad0a21067536a18ce2266b846a91add8f0b55cc15fa70c	18	5.85607	12.1039	1.14795	0.555398	9.71423	4.87338	41.2364	a1fdcf87-8b03-4fa4-8737-1fe32b47c372	1.16157	0.707491	1.86906	10.3424	0.980888	130.571	20.1039	6.58974	26.6937	10.5891	1.00429
	c7a853c2abef3faa98ad0a21067536a18ce2266b846a91add8f0b55cc15fa70c	19	46.5924	27.1672	2.57657	4.41888	10.3347	5.15186	39.7091	43954ab7-b38a-4a94-9b02-54808995dc00	0.728449	0.991282	1.71973	25.3368	2.40298	179.908	7.24846	8.75977	16.0082	27.3395	2.59291
	c7a853c2abef3faa98ad0a21067536a18ce2266b846a91add8f0b55cc15fa70c	20	8.17898	8.6059	0.816195	0.775705	11.1596	6.40502	44.2909	3173ef28-fb0f-40d4-b042-1cb0b87e0910	1.30366	2.23629	3.53995	5.15559	0.488963	111.007	49.877	5.56334	55.4404	5.09386	0.483108
	c7a853c2abef3faa98ad0a21067536a18ce2266b846a91add8f0b55cc15fa70c	21	11.3421	8.14841	0.772806	1.0757	9.57991	6.12654	35.1273	db3c3e91-930a-4bed-9065-d722c75fa88d	0.310201	0.902991	1.21319	5.5724	0.528494	31.8985	6.53427	3.73942	10.2737	6.28895	0.596452
	c7a853c2abef3faa98ad0a21067536a18ce2266b846a91add8f0b55cc15fa70c	22	-2.09131	8.30469	0.787628	-0.198343	10.487	3.48099	39.7091	93c78f68-b434-492f-99ed-88f2fd5ccf8e	0.354355	0.692026	1.04638	6.59953	0.625908	13.8227	2.45638	6.69967	9.15605	7.82099	0.741753
	c7a853c2abef3faa98ad0a21067536a18ce2266b846a91add8f0b55cc15fa70c	23	0.793971	9.36758	0.888433	0.0753012	10.1774	5.43034	45.8182	d48a7784-8159-4ef9-80cc-12479a8fe005	0.591375	2.17543	2.7668	5.05297	0.47923	51.8882	3.70782	15.7677	19.4755	6.89232	0.653677
	c7a853c2abef3faa98ad0a21067536a18ce2266b846a91add8f0b55cc15fa70c	24	11.8823	8.85786	0.840091	1.12693	10.1821	4.45566	42.7636	b2002f03-a5f0-4b28-809c-6a378d482675	0.581045	0.618654	1.1997	8.45322	0.801715	46.5718	4.44119	4.45301	8.8942	10.347	0.981327
	c7a853c2abef3faa98ad0a21067536a18ce2266b846a91add8f0b55cc15fa70c	25	21.1298	14.953	1.41817	2.00398	10.6252	6.12654	36.6545	060c9f7d-d5ea-4af4-9e7d-729bc7c3a310	0.776143	0.779549	1.55569	14.7937	1.40305	562.902	115.948	5.95495	121.903	12.0691	1.14465
	c7a853c2abef3faa98ad0a21067536a18ce2266b846a91add8f0b55cc15fa70c	26	13.0426	7.9633	0.75525	1.23698	11.5525	5.43034	77.8909	98045c33-34e9-4181-bbf8-74ae62bab009	0.811842	2.34713	3.15897	6.69186	0.634664	124.829	8.84767	38.2313	47.079	6.41185	0.608108
	c7a853c2abef3faa98ad0a21067536a18ce2266b846a91add8f0b55cc15fa70c	27	9.03193	8.46452	0.802786	0.8566	11.1989	3.75947	54.9818	dc486854-946f-4a6a-80e6-a68cd28c524c	0.722481	0.641667	1.36415	6.35055	0.602294	37.6402	13.0336	7.85083	20.8844	7.11889	0.675165
	c7a853c2abef3faa98ad0a21067536a18ce2266b846a91add8f0b55cc15fa70c	28	13.9804	9.79085	0.928577	1.32592	11.9778	4.31642	42.7636	74033ffa-5ebf-4481-b326-6b20979b5b8b	0.548712	1.80124	2.34995	6.4794	0.614515	46.5718	5.09464	7.54087	12.6355	7.43505	0.70515
	c7a853c2abef3faa98ad0a21067536a18ce2266b846a91add8f0b55cc15fa70c	29	31.1481	16.3946	1.55489	2.95412	10.95	5.56958	42.7636	0725e77a-08e3-4921-a8e7-35e83c5d0f2e	1.03452	0.838766	1.87328	16.5603	1.5706	192.029	12.0585	8.46058	20.5191	16.6705	1.58105
	c7a853c2abef3faa98ad0a21067536a18ce2266b846a91add8f0b55cc15fa70c	30	23.7482	23.9361	2.27014	2.25231	10.9934	6.54425	42.7636	87b14c9c-22ae-4ff9-a296-862ef664a790	0.939628	0.933238	1.87287	20.4536	1.93984	506.973	71.8895	5.67654	77.566	20.8002	1.97272
	c7a853c2abef3faa98ad0a21067536a18ce2266b846a91add8f0b55cc15fa70c	31	8.51886	8.23773	0.781277	0.80794	10.2402	8.49361	87.0545	a11b8153-66f1-464f-8195-5fe2429745c7	1.47794	4.54134	6.01928	4.45028	0.422071	227.755	12.0461	36.7423	48.7884	5.38374	0.510601
	c7a853c2abef3faa98ad0a21067536a18ce2266b846a91add8f0b55cc15fa70c	32	9.05814	8.61399	0.816963	0.859086	10.2443	3.89871	33.6	d2207636-95d7-4675-a298-de7c89421395	0.39129	0.791388	1.18268	7.10618	0.67396	10.6328	2.21441	3.34543	5.55984	10.6552	1.01055
	c7a853c2abef3faa98ad0a21067536a18ce2266b846a91add8f0b55cc15fa70c	33	1.82775	8.34549	0.791498	0.173346	10.6248	5.84806	44.2909	075353e6-a1d3-4649-a87b-fb9ef6701d24	0.326764	2.13786	2.46462	7.27443	0.689916	62.9464	4.21206	6.10665	10.3187	7.51144	0.712395
	c7a853c2abef3faa98ad0a21067536a18ce2266b846a91add8f0b55cc15fa70c	34	27.5234	22.7283	2.15559	2.61035	10.6783	7.24045	212.291	b7599e79-2c24-4748-89cd-91edc15f987b	0.89519	1.47828	2.37347	16.646	1.57873	1776.32	102.775	184.392	287.167	12.5916	1.19421
	c7a853c2abef3faa98ad0a21067536a18ce2266b846a91add8f0b55cc15fa70c	35	28.2385	24.2888	2.30359	2.67818	11.2329	7.10121	48.8727	1c8f6b2c-fb23-4fcd-a102-555826ad93e3	1.0182	1.41353	2.43173	19.4587	1.84549	359.39	29.0442	9.4936	38.5378	19.6417	1.86285
	c7a853c2abef3faa98ad0a21067536a18ce2266b846a91add8f0b55cc15fa70c	36	17.6217	9.43033	0.894385	1.67127	10.2356	4.17718	48.8727	b44f180a-3541-429b-bcf4-711b2dff6862	0.547058	1.0717	1.61876	7.60828	0.72158	45.9338	23.8168	17.7841	41.601	7.09988	0.673363
	c7a853c2abef3faa98ad0a21067536a18ce2266b846a91add8f0b55cc15fa70c	37	21.0077	7.95858	0.754802	1.9924	10.8008	4.17718	35.1273	1a2e09be-ea67-4ae5-9373-43c3c3913e62	1.04874	0.438921	1.48766	5.65423	0.536255	15.9492	2.65902	4.32534	6.98436	7.98791	0.757584
	c7a853c2abef3faa98ad0a21067536a18ce2266b846a91add8f0b55cc15fa70c	38	17.7224	13.2817	1.25965	1.68082	11.496	5.2911	38.1818	3081e647-f954-488f-ac51-15c59761fc88	1.10546	0.858532	1.96399	11.9836	1.13654	226.905	10.0083	7.79983	17.8081	11.8877	1.12745
	c7a853c2abef3faa98ad0a21067536a18ce2266b846a91add8f0b55cc15fa70c	39	34.8261	23.5979	2.23806	3.30296	11.6233	6.12654	41.2364	4ee0ebde-36bb-4a62-9a25-c27e94d4fa51	0.720569	1.50745	2.22802	19.3212	1.83245	331.319	22.5354	10.0657	32.6011	17.6255	1.67163
	c7a853c2abef3faa98ad0a21067536a18ce2266b846a91add8f0b55cc15fa70c	40	16.763	12.3893	1.17502	1.58983	11.4304	5.15186	50.4	ca88e0b8-651a-47a2-8f0f-d47e2bdcd980	0.548962	0.633514	1.18248	11.213	1.06346	203.725	66.7295	14.9456	81.6751	8.70084	0.825199
	c7a853c2abef3faa98ad0a21067536a18ce2266b846a91add8f0b55cc15fa70c	41	32.067	7.60483	0.721252	3.04127	10.0966	3.48099	35.1273	ad6dfa59-e03c-4444-b322-ac993ac56cae	0.395166	0.399339	0.794505	7.40269	0.702081	11.4835	3.49252	3.72473	7.21725	8.71407	0.826454
	c7a853c2abef3faa98ad0a21067536a18ce2266b846a91add8f0b55cc15fa70c	42	14.3855	11.2065	1.06284	1.36434	10.7029	5.15186	48.8727	90864594-6930-42ca-81ca-25b7002b3132	0.42314	0.508437	0.931578	10.6466	1.00973	78.683	12.6181	10.9386	23.5567	8.13853	0.771869
	c7a853c2abef3faa98ad0a21067536a18ce2266b846a91add8f0b55cc15fa70c	43	11.6625	8.63923	0.819357	1.10608	11.5932	5.43034	38.1818	0860f532-1307-4baf-a38d-4aa98ca6b8a1	1.51563	0.731754	2.24739	8.28321	0.785591	49.549	10.8489	6.97483	17.8237	7.05696	0.669292
	c64901f53017c962b84a36f7db978ae392a4bf77b2f439cfbd1bbad087a4c679	1	1.25266	5.11125	0.888923	0.217856	4.42144	3.5193	36.6545	168e6827-308f-4941-b583-1a7f32386518	0.438617	0.781205	1.21982	3.69847	0.643219	9.45989	3.9174	3.76584	7.68324	4.81828	0.837971
	c64901f53017c962b84a36f7db978ae392a4bf77b2f439cfbd1bbad087a4c679	2	5.93829	7.44928	1.29554	1.03276	4.58414	5.0678	36.6545	d2eb9366-e3f1-481a-872e-3923f2635f42	1.84093	1.92993	3.77086	5.6495	0.982532	69.0142	3.61542	6.41026	10.0257	8.58675	1.49336
	c64901f53017c962b84a36f7db978ae392a4bf77b2f439cfbd1bbad087a4c679	3	7.0151	5.82664	1.01334	1.22003	4.28857	3.5193	36.6545	d225e32d-60f8-4eb7-9f7c-baecff7d3a5c	0.272533	0.66907	0.941603	4.27294	0.743128	9.02989	5.53129	3.46006	8.99135	4.76361	0.828463
	c64901f53017c962b84a36f7db978ae392a4bf77b2f439cfbd1bbad087a4c679	4	2.14535	6.02028	1.04702	0.373108	4.72611	3.37853	36.6545	562a1d38-9fc6-4b8d-83fb-469ab72d1b2d	0.309037	0.390142	0.699178	5.67274	0.986575	9.67489	2.66717	3.41264	6.07981	7.21493	1.25478
	c64901f53017c962b84a36f7db978ae392a4bf77b2f439cfbd1bbad087a4c679	5	16.3879	9.85963	1.71474	2.85011	5.29872	4.22316	53.4545	aba36a82-b018-4331-8737-e206c1984f20	0.679761	1.00951	1.68927	7.83733	1.36303	75.4641	6.8513	7.44256	14.2939	9.00957	1.5669
	c64901f53017c962b84a36f7db978ae392a4bf77b2f439cfbd1bbad087a4c679	6	2.82805	5.86731	1.02041	0.49184	4.91917	3.66008	33.6	e04e47a2-ecb1-4a30-9e72-f407d2a5b162	0.359917	0.920746	1.28066	4.13286	0.718766	8.5999	2.46384	3.37323	5.83707	6.14774	1.06918
	c64901f53017c962b84a36f7db978ae392a4bf77b2f439cfbd1bbad087a4c679	7	-0.320323	6.57217	1.143	-0.0557089	4.78467	3.37853	39.7091	7233c6a5-9310-4526-92e3-5e56a3c41072	0.352693	0.541003	0.893696	5.21319	0.906651	9.67489	2.09139	3.86983	5.96122	7.88791	1.37183
	c64901f53017c962b84a36f7db978ae392a4bf77b2f439cfbd1bbad087a4c679	8	18.0591	7.66209	1.33255	3.14074	5.53051	4.92703	33.6	4696dbfa-0507-492e-a69d-46600aeec693	0.469856	0.776149	1.246	7.31761	1.27264	53.3194	23.1764	3.44394	26.6204	7.08168	1.23161
	c64901f53017c962b84a36f7db978ae392a4bf77b2f439cfbd1bbad087a4c679	9	25.6007	9.85096	1.71323	4.45234	4.97178	4.36394	41.2364	8f79001f-3b08-47ba-8da0-cd19a8ec2d84	0.493074	0.449891	0.942965	10.4738	1.82154	46.4395	3.61617	7.35155	10.9677	10.6886	1.85891
	c64901f53017c962b84a36f7db978ae392a4bf77b2f439cfbd1bbad087a4c679	10	1.07316	5.42538	0.943554	0.186639	5.70561	3.37853	35.1273	e0b8d986-75af-43c3-ac58-e923a231ddc6	1.65356	0.623179	2.27674	4.46245	0.776086	12.2549	4.04062	4.39604	8.43666	5.58116	0.970647
	c64901f53017c962b84a36f7db978ae392a4bf77b2f439cfbd1bbad087a4c679	11	11.0223	6.51267	1.13265	1.91695	6.14905	5.77166	33.6	a9f7f2ff-3bc2-43bf-aea1-9b5214bbd5eb	0.348494	0.64619	0.994684	5.30086	0.921898	72.0242	10.5314	5.44129	15.9727	4.76268	0.828302
	c64901f53017c962b84a36f7db978ae392a4bf77b2f439cfbd1bbad087a4c679	12	6.76358	6.68721	1.16301	1.17629	6.32413	4.08239	42.7636	4a0bd468-7ca0-48e1-bc3c-528c78bf4c98	0.416534	0.970108	1.38664	5.24248	0.911745	23.2197	2.46969	9.99222	12.4619	6.47251	1.12567
	c64901f53017c962b84a36f7db978ae392a4bf77b2f439cfbd1bbad087a4c679	13	16.0975	6.91714	1.20299	2.79959	6.28	4.50471	35.1273	dd1d1783-5584-49a2-8b78-a9c15eedd960	0.527826	1.76277	2.29059	5.097	0.886443	15.6948	2.42007	3.49998	5.92005	9.46388	1.64591
	c64901f53017c962b84a36f7db978ae392a4bf77b2f439cfbd1bbad087a4c679	14	14.8869	6.30268	1.09613	2.58905	6.27126	4.78625	61.0909	075faec3-0298-49b0-b7ad-421e4d280889	1.936	1.89287	3.82886	4.88078	0.848841	66.4342	3.58944	7.75327	11.3427	6.29697	1.09514
	c64901f53017c962b84a36f7db978ae392a4bf77b2f439cfbd1bbad087a4c679	15	5.70942	5.27718	0.91778	0.992953	6.16159	3.37853	38.1818	d0763531-66f1-4e17-a378-3def6f1a3175	0.966457	0.735148	1.70161	5.30505	0.922626	15.2648	5.14802	7.86275	13.0108	6.09372	1.05979
	c64901f53017c962b84a36f7db978ae392a4bf77b2f439cfbd1bbad087a4c679	16	9.55555	7.1754	1.24791	1.66185	6.64068	4.36394	50.4	0306cbf1-15b4-470c-b7c8-46d8f253869e	0.497814	0.46332	0.961134	4.65075	0.808835	32.4646	12.6758	14.863	27.5388	4.61448	0.802527
	c64901f53017c962b84a36f7db978ae392a4bf77b2f439cfbd1bbad087a4c679	17	2.89705	10.4478	1.81703	0.503841	6.65642	5.0678	45.8182	c5fb9a06-fc30-4e6d-b7d4-086c3558fd8e	0.545701	0.632785	1.17849	9.35402	1.6268	93.3089	5.81265	4.76746	10.5801	10.2494	1.78252
	c64901f53017c962b84a36f7db978ae392a4bf77b2f439cfbd1bbad087a4c679	18	15.4215	10.779	1.87463	2.68203	6.86706	5.77166	193.964	f2a33af7-2b0b-40de-bc05-546080634962	0.694898	1.26323	1.95813	8.64685	1.50382	633.168	45.8352	166.044	211.879	6.63919	1.15465
	c64901f53017c962b84a36f7db978ae392a4bf77b2f439cfbd1bbad087a4c679	19	6.95122	6.60723	1.1491	1.20892	6.80168	3.94162	33.6	8352ed22-08ea-4f53-be59-6f1565fc45e5	0.261947	0.491795	0.753742	6.52807	1.13533	9.24489	4.2415	4.51158	8.75308	5.32623	0.92631
	c64901f53017c962b84a36f7db978ae392a4bf77b2f439cfbd1bbad087a4c679	20	11.0561	6.93281	1.20572	1.92283	5.46903	3.66008	42.7636	a7c980c1-a893-4ae6-b17f-1bfd8ecb5473	0.599279	0.674404	1.27368	5.52391	0.960691	24.7247	2.9314	5.50859	8.44	6.9759	1.21321
	c64901f53017c962b84a36f7db978ae392a4bf77b2f439cfbd1bbad087a4c679	21	14.5765	12.2526	2.13091	2.53507	7.35039	8.02401	157.309	fa52083e-2563-4343-943b-390e8c327eef	1.2374	2.42257	3.65997	7.32434	1.27381	1475.53	302.066	109.193	411.258	6.96022	1.21049
	c64901f53017c962b84a36f7db978ae392a4bf77b2f439cfbd1bbad087a4c679	22	8.29503	6.86379	1.19372	1.44263	7.23813	4.36394	38.1818	020c33bf-5d50-4e4e-b48f-85d31a1c5adc	2.02624	1.72585	3.75209	4.4772	0.778651	32.4646	4.23415	6.4972	10.7314	5.98903	1.04158
	c64901f53017c962b84a36f7db978ae392a4bf77b2f439cfbd1bbad087a4c679	23	18.8791	9.53333	1.65799	3.28336	5.74187	5.20857	44.2909	c6c5baf5-e6a8-4ee9-a86b-97877f3c6739	1.26207	2.12951	3.39158	6.84706	1.1908	75.4641	3.67483	6.84492	10.5197	8.80838	1.53191
	c64901f53017c962b84a36f7db978ae392a4bf77b2f439cfbd1bbad087a4c679	24	7.8544	7.08999	1.23305	1.366	7.54286	4.78625	35.1273	af802c11-b023-4ad6-bfa9-0ed4efc464ec	0.368929	2.02781	2.39674	4.5896	0.7982	42.3545	3.95538	3.17798	7.13336	6.60913	1.14943
	c64901f53017c962b84a36f7db978ae392a4bf77b2f439cfbd1bbad087a4c679	25	13.6971	8.14446	1.41644	2.38212	7.13569	4.08239	62.6182	00a2dd9d-9530-4554-950b-2a7ffa1068d7	1.61465	0.888842	2.50349	4.40835	0.766677	61.2743	16.6112	22.0093	38.6205	6.17555	1.07402
	c64901f53017c962b84a36f7db978ae392a4bf77b2f439cfbd1bbad087a4c679	26	7.82872	9.30247	1.61784	1.36153	7.29876	3.94162	90.1091	09f26f40-8546-4a0b-8859-d3c84959ff9d	0.645121	0.767693	1.41281	7.92092	1.37757	118.679	4.31016	10.0062	14.3164	8.66934	1.50773
	c64901f53017c962b84a36f7db978ae392a4bf77b2f439cfbd1bbad087a4c679	27	9.42352	9.63592	1.67583	1.63889	6.8591	4.50471	36.6545	22d02bc7-9cea-487b-93b7-d0a3713740e9	1.22862	1.60881	2.83744	6.98288	1.21443	73.9591	4.57845	3.9095	8.48795	10.2871	1.78907
	c64901f53017c962b84a36f7db978ae392a4bf77b2f439cfbd1bbad087a4c679	28	18.6447	6.41999	1.11653	3.24258	7.31218	4.36394	41.2364	23710091-2788-4d81-abd7-89e7840002fb	0.562021	1.52185	2.08387	5.99466	1.04256	28.3797	4.44681	4.45255	8.89936	6.89945	1.19992
	c64901f53017c962b84a36f7db978ae392a4bf77b2f439cfbd1bbad087a4c679	29	7.4285	7.36855	1.2815	1.29193	7.53859	3.80085	38.1818	8f1d3561-d669-43b7-8b19-3a66e906fc0d	0.286644	0.981346	1.26799	5.01823	0.872745	10.9649	2.44072	4.36686	6.80758	6.67464	1.16082
	c64901f53017c962b84a36f7db978ae392a4bf77b2f439cfbd1bbad087a4c679	30	9.52599	8.43063	1.46621	1.65671	7.44126	4.36394	51.9273	c9357000-f525-45f6-b31f-43d4be0c2c98	0.825243	0.472772	1.29802	7.088	1.23271	56.3293	4.57988	20.4517	25.0315	6.21967	1.08169
	c64901f53017c962b84a36f7db978ae392a4bf77b2f439cfbd1bbad087a4c679	31	12.5809	6.45836	1.12321	2.188	7.88895	4.92703	47.3455	f7f3a570-349f-48ca-b158-1c85590a35ac	0.561945	3.1968	3.75875	3.87346	0.673653	37.8396	19.0763	32.2114	51.2878	4.23012	0.735681
	c64901f53017c962b84a36f7db978ae392a4bf77b2f439cfbd1bbad087a4c679	32	10.7576	7.79521	1.3557	1.8709	6.4485	4.36394	36.6545	25d0775f-e0b5-466a-b327-c362d71374bb	0.809608	1.02266	1.83227	6.48674	1.12814	151.573	69.5151	7.92812	77.4432	6.02527	1.04788
	c64901f53017c962b84a36f7db978ae392a4bf77b2f439cfbd1bbad087a4c679	33	1.17615	7.95312	1.38317	0.20455	7.82884	4.50471	58.0364	38734414-1618-46ec-a137-6692cae0cc65	1.19073	1.10414	2.29487	6.65988	1.15825	83.849	4.83239	16.4487	21.2811	7.95773	1.38397
	c64901f53017c962b84a36f7db978ae392a4bf77b2f439cfbd1bbad087a4c679	34	10.3577	6.67018	1.16004	1.80135	7.37915	3.80085	45.8182	1bb46e83-4937-4899-956b-a114126660c3	0.394519	0.507128	0.901646	7.91027	1.37571	25.7997	6.33745	7.85438	14.1918	7.51187	1.30643
	c64901f53017c962b84a36f7db978ae392a4bf77b2f439cfbd1bbad087a4c679	35	7.03902	6.72154	1.16898	1.22419	7.29921	3.37853	36.6545	57877b99-c309-4a33-9f29-353ee02c1a5d	0.39473	0.740258	1.13499	5.04987	0.878248	9.02989	2.34255	3.85406	6.19661	6.96677	1.21162
	c64901f53017c962b84a36f7db978ae392a4bf77b2f439cfbd1bbad087a4c679	36	-2.77978	6.45522	1.12266	-0.483446	7.47872	3.37853	51.9273	cadffddb-85bb-41b0-9ab3-eb87f7708a04	2.45757	0.558507	3.01608	4.3412	0.754999	61.4893	46.0475	14.0062	60.0537	5.03758	0.87611
	c64901f53017c962b84a36f7db978ae392a4bf77b2f439cfbd1bbad087a4c679	37	4.1127	9.17323	1.59536	0.715259	7.41622	3.80085	59.5636	24621bae-372d-4795-82c6-be738c895526	0.758077	0.915319	1.6734	6.83033	1.1879	58.2643	6.24112	6.59368	12.8348	7.22149	1.25592
	c64901f53017c962b84a36f7db978ae392a4bf77b2f439cfbd1bbad087a4c679	38	12.3542	6.77587	1.17842	2.14858	7.96378	3.5193	47.3455	9a002968-9ff7-4122-8db2-cc3affdaf1e2	0.393313	0.374748	0.768061	5.7603	1.0018	18.0598	2.6739	5.77571	8.44961	7.48589	1.30191
	c64901f53017c962b84a36f7db978ae392a4bf77b2f439cfbd1bbad087a4c679	39	8.90109	7.9584	1.38408	1.54803	7.86627	3.80085	67.2	e5a40564-5ef5-409e-b81d-22181779109d	1.81844	1.60134	3.41978	5.99119	1.04196	131.148	49.3867	10.3893	59.776	6.11047	1.0627
	c64901f53017c962b84a36f7db978ae392a4bf77b2f439cfbd1bbad087a4c679	40	11.5692	8.81443	1.53296	2.01206	8.0302	3.37853	38.1818	48787810-4f87-47ab-8790-a2c8c7404b60	1.26052	0.849532	2.11005	4.91434	0.854676	17.4148	3.6737	4.8782	8.5519	6.51421	1.13292
	c64901f53017c962b84a36f7db978ae392a4bf77b2f439cfbd1bbad087a4c679	41	2.61193	7.85547	1.36618	0.454254	7.85104	5.49011	33.6	16de0848-cdb6-43a2-86a6-9f2c6ab058ad	1.69922	0.591993	2.29121	5.30966	0.923429	138.673	7.81692	3.93202	11.7489	6.69197	1.16383
	c64901f53017c962b84a36f7db978ae392a4bf77b2f439cfbd1bbad087a4c679	42	9.64871	7.23018	1.25744	1.67805	7.99901	3.66008	38.1818	80d70f75-af79-4c63-847e-cbb91a009f81	0.383272	0.785649	1.16892	6.65909	1.15811	12.2549	2.68142	4.84113	7.52254	7.79017	1.35483
	c64901f53017c962b84a36f7db978ae392a4bf77b2f439cfbd1bbad087a4c679	43	6.01537	6.97987	1.2139	1.04616	8.09508	3.37853	39.7091	47a9a295-ef64-4246-bd91-5d9ae2a35801	0.860731	0.729656	1.59039	5.31438	0.92425	16.1248	19.2366	32.2573	51.4939	6.34694	1.10383
	c64901f53017c962b84a36f7db978ae392a4bf77b2f439cfbd1bbad087a4c679	44	9.07957	7.3041	1.27029	1.57907	8.16027	4.92703	38.1818	cc206d4e-dc3e-4390-b630-c1f1f3ca7077	2.43501	2.29706	4.73207	4.67918	0.81378	40.8495	8.84462	4.33764	13.1823	6.47652	1.12636
	c64901f53017c962b84a36f7db978ae392a4bf77b2f439cfbd1bbad087a4c679	45	2.54698	8.40892	1.46244	0.442957	8.09953	4.36394	42.7636	19bbdb3f-9c2d-4beb-9d61-ebd74653158e	1.32121	0.611748	1.93296	7.5069	1.30556	59.9843	32.4533	10.9964	43.4497	7.23906	1.25898
	c64901f53017c962b84a36f7db978ae392a4bf77b2f439cfbd1bbad087a4c679	46	-0.278657	7.26892	1.26417	-0.0484626	8.2298	4.08239	36.6545	0ec76fe2-f8a5-449c-bb63-3f575bba45f5	0.427592	0.684083	1.11168	5.82996	1.01392	19.1348	7.37262	3.98656	11.3592	5.40476	0.939969
	c64901f53017c962b84a36f7db978ae392a4bf77b2f439cfbd1bbad087a4c679	47	6.31273	8.07812	1.40491	1.09788	8.41973	4.78625	59.5636	abbd0e77-dca2-456b-820f-70e6e4ddf751	0.483787	1.56931	2.0531	6.27306	1.09098	75.2491	37.6269	28.539	66.1659	6.19284	1.07703
	83b071149d677efac3e2add993c4cf2281ab6eadeeab34b8f006c42a79d9e485	1	9.20693	19.9753	2.28809	1.05462	7.14354	6.69733	44.2909	209fc841-b698-4ab0-9525-c9a97178a538	1.01688	1.49823	2.51511	19.482	2.23159	311.547	9.43563	5.7067	15.1423	20.8856	2.39236
	83b071149d677efac3e2add993c4cf2281ab6eadeeab34b8f006c42a79d9e485	2	26.0004	23.4591	2.68715	2.97825	7.20518	5.30205	38.1818	9f13047e-8a8f-4907-98e4-b9356ec4c456	0.936477	1.18002	2.11649	19.6194	2.24732	284.484	15.4214	5.6051	21.0265	21.0363	2.40962
	83b071149d677efac3e2add993c4cf2281ab6eadeeab34b8f006c42a79d9e485	3	12.5762	14.0385	1.60805	1.44056	8.81868	5.86016	41.2364	f7aacfdb-2c50-49ca-8061-d3af39b83c87	0.615792	1.83106	2.44685	10.9473	1.25397	96.7459	8.23428	9.37225	17.6065	10.6335	1.21803
	83b071149d677efac3e2add993c4cf2281ab6eadeeab34b8f006c42a79d9e485	4	24.0028	11.7302	1.34365	2.74943	7.0195	6.41827	51.9273	a0afa8a9-d6f1-4d33-8f78-ea5daabcfa64	1.60829	2.32349	3.93178	10.1756	1.16557	280.222	22.5607	16.1281	38.6888	10.4674	1.199
	83b071149d677efac3e2add993c4cf2281ab6eadeeab34b8f006c42a79d9e485	5	22.277	22.6283	2.59198	2.55175	7.50145	5.99969	39.7091	6dd807c0-22c9-430d-916f-a95717a3f2f2	1.00047	1.44508	2.44554	20.6838	2.36925	320.071	8.85414	6.84809	15.7022	21.5819	2.47213
	83b071149d677efac3e2add993c4cf2281ab6eadeeab34b8f006c42a79d9e485	6	-1.91646	5.88243	0.67381	-0.219523	7.282	3.62772	42.7636	8ce43c6e-7559-480f-98f0-c238f83f9b16	0.352187	0.530465	0.882652	4.97579	0.569957	13.212	2.71751	6.29378	9.01129	5.19666	0.595258
	83b071149d677efac3e2add993c4cf2281ab6eadeeab34b8f006c42a79d9e485	7	7.17313	8.87384	1.01646	0.821654	8.17109	4.46488	38.1818	552bc081-11e2-4464-8c7f-c41d2e3202b3	0.474731	0.455045	0.929776	9.28986	1.06412	47.5206	10.7064	5.53794	16.2444	8.08313	0.92589
	83b071149d677efac3e2add993c4cf2281ab6eadeeab34b8f006c42a79d9e485	8	7.19965	6.81472	0.780599	0.824691	7.91709	3.76725	44.2909	ac4278ff-3dbc-4d2f-9e3a-3a1275e5f07a	1.5496	0.333868	1.88347	5.43158	0.622167	29.6204	7.71087	24.6557	32.3665	4.65811	0.533569
	83b071149d677efac3e2add993c4cf2281ab6eadeeab34b8f006c42a79d9e485	9	18.9442	11.3628	1.30156	2.16999	8.27159	4.60441	38.1818	00bfbd16-4ecc-4b13-a44f-e32466a54c79	0.733293	0.878963	1.61226	9.82555	1.12548	88.4351	12.174	5.14003	17.314	10.0725	1.15376
	83b071149d677efac3e2add993c4cf2281ab6eadeeab34b8f006c42a79d9e485	10	16.4246	7.85671	0.899956	1.88137	8.88105	4.32536	45.8182	e3ed71b0-4642-4938-acda-3ef4bdef54c2	0.411691	0.649925	1.06162	6.40816	0.73403	30.6859	4.36439	6.07592	10.4403	7.03361	0.805672
	83b071149d677efac3e2add993c4cf2281ab6eadeeab34b8f006c42a79d9e485	11	23.9799	8.50327	0.974016	2.7468	8.74722	4.46488	33.6	0b7081f2-a44d-446d-94d9-89cfef3a3194	0.37912	0.562482	0.941603	7.00966	0.802929	33.4562	4.64809	3.34077	7.98886	8.77631	1.00529
	83b071149d677efac3e2add993c4cf2281ab6eadeeab34b8f006c42a79d9e485	12	0.914635	10.0664	1.15307	0.104768	8.32428	4.18583	48.8727	e376b6d9-e3b1-4a8c-b2f5-e8659fdf0eb3	1.61706	0.460645	2.07771	7.2143	0.82637	104.204	20.9047	19.0783	39.983	7.78281	0.89149
	83b071149d677efac3e2add993c4cf2281ab6eadeeab34b8f006c42a79d9e485	13	4.43452	7.06398	0.809151	0.507957	8.70284	3.48819	36.6545	744bec29-26f3-4ae3-a840-89dceeac4475	0.615505	0.546538	1.16204	6.47391	0.741561	15.5561	4.13188	6.62925	10.7611	7.13281	0.817036
	83b071149d677efac3e2add993c4cf2281ab6eadeeab34b8f006c42a79d9e485	14	2.97461	7.80851	0.894434	0.34073	9.22905	5.02299	42.7636	a0a459f1-f5ac-48a3-8f59-04d021bd9a1d	0.560517	2.121	2.68152	5.31785	0.609139	58.6016	11.4486	8.04731	19.4959	6.01744	0.689275
	83b071149d677efac3e2add993c4cf2281ab6eadeeab34b8f006c42a79d9e485	15	11.7127	6.89237	0.789494	1.34164	7.72581	3.62772	35.1273	2fcf9c04-0b2a-4a1e-8209-1d69cd193632	0.388074	0.437403	0.825476	5.73698	0.657149	10.2286	4.4211	4.94646	9.36755	5.33691	0.611322
	83b071149d677efac3e2add993c4cf2281ab6eadeeab34b8f006c42a79d9e485	16	10.5871	14.3406	1.64267	1.21271	7.74818	4.88347	47.3455	d7988737-1fd9-49d1-bee1-308d19a25662	0.699527	0.810227	1.50975	13.1391	1.50503	164.937	8.66007	7.55309	16.2132	12.3997	1.42034
	83b071149d677efac3e2add993c4cf2281ab6eadeeab34b8f006c42a79d9e485	17	19.3951	11.6161	1.33058	2.22163	7.89497	5.16252	35.1273	4ff46563-cc41-4348-96c3-6d2173bca05d	0.640751	1.1966	1.83735	10.31	1.18097	108.892	15.7129	3.86175	19.5746	10.7969	1.23674
	83b071149d677efac3e2add993c4cf2281ab6eadeeab34b8f006c42a79d9e485	18	11.0425	12.3758	1.4176	1.26487	8.63876	4.88347	38.1818	52536f07-8a38-4a70-9913-71e6fd5b7efe	1.17356	1.53486	2.70842	9.55616	1.09462	90.9923	5.51873	3.70884	9.22757	13.2767	1.52079
	83b071149d677efac3e2add993c4cf2281ab6eadeeab34b8f006c42a79d9e485	19	9.69548	7.07041	0.809888	1.11058	9.07416	3.34866	41.2364	bd188b51-ef29-4d8f-91e1-cfa4f1899d28	1.18475	0.457304	1.64205	6.60711	0.756818	27.9157	7.6592	5.99402	13.6532	6.29087	0.720595
	83b071149d677efac3e2add993c4cf2281ab6eadeeab34b8f006c42a79d9e485	20	21.6421	11.3669	1.30203	2.47901	8.03415	5.5811	48.8727	24391db8-13c3-44bb-9c72-28b4b0cb3eb1	0.791643	0.966013	1.75766	9.89154	1.13304	219.063	23.0527	8.79645	31.8492	10.5715	1.21093
	83b071149d677efac3e2add993c4cf2281ab6eadeeab34b8f006c42a79d9e485	21	14.844	17.8858	2.04874	1.70032	8.71243	4.74394	39.7091	4e240113-9dc5-48f5-91d9-31eaaee8c38e	0.733381	0.69924	1.43262	15.8621	1.81694	71.3874	6.5344	5.38649	11.9209	17.7148	2.02916
	83b071149d677efac3e2add993c4cf2281ab6eadeeab34b8f006c42a79d9e485	22	1.38486	7.39238	0.846768	0.15863	8.17861	4.32536	42.7636	8ecb82bf-6497-42e9-874b-8286248b1d9f	0.466311	1.4593	1.92561	5.40867	0.619542	40.4884	7.56131	11.1077	18.669	5.33779	0.611423
	83b071149d677efac3e2add993c4cf2281ab6eadeeab34b8f006c42a79d9e485	23	11.0998	8.85916	1.01478	1.27144	9.06945	4.18583	74.8364	5676a0fa-63ea-467a-b6d9-8caa0040227e	2.44349	0.597847	3.04134	5.59377	0.640744	90.1399	3.62315	36.4291	40.0523	8.09034	0.926716
	83b071149d677efac3e2add993c4cf2281ab6eadeeab34b8f006c42a79d9e485	24	9.14746	8.11215	0.929215	1.04781	9.16927	4.0463	56.5091	df59b436-fe17-4500-b46c-afbdd4255659	0.47164	0.485651	0.957292	7.98346	0.914475	62.6504	19.9851	53.0939	73.079	6.50511	0.745134
	83b071149d677efac3e2add993c4cf2281ab6eadeeab34b8f006c42a79d9e485	25	13.0523	9.3215	1.06774	1.49509	9.20418	4.32536	48.8727	9be5640e-1373-4a76-987d-ebe816fa7223	0.908241	0.89582	1.80406	6.21314	0.71169	43.2586	3.08523	7.35137	10.4366	9.16441	1.04975
	83b071149d677efac3e2add993c4cf2281ab6eadeeab34b8f006c42a79d9e485	26	11.3189	7.51139	0.8604	1.29654	9.16116	5.16252	76.3636	e0f3bce7-9ae5-4223-b963-6a6dcfc71dbc	2.52572	1.98278	4.5085	5.38415	0.616733	114.433	28.7174	48.2745	76.9919	5.98389	0.685432
	83b071149d677efac3e2add993c4cf2281ab6eadeeab34b8f006c42a79d9e485	27	6.57253	8.29113	0.949716	0.752858	9.09191	6.69733	105.382	9d469e1a-740b-4406-9826-de4406723f48	0.478199	2.90888	3.38708	5.1951	0.595079	173.674	13.6169	75.1187	88.7356	4.28019	0.490279
	83b071149d677efac3e2add993c4cf2281ab6eadeeab34b8f006c42a79d9e485	28	5.57034	8.12749	0.930972	0.638061	9.26053	5.44158	36.6545	ec268c4a-5717-4819-85a8-bffa8d0b1127	0.35447	1.80151	2.15598	6.5162	0.746405	34.9479	10.5804	5.96123	16.5416	6.50188	0.744765
	83b071149d677efac3e2add993c4cf2281ab6eadeeab34b8f006c42a79d9e485	29	8.55455	7.12123	0.815708	0.979891	9.28048	5.02299	35.1273	661ddcc3-0683-4d08-8209-1a1e7fbfd3b2	1.0047	1.84919	2.8539	6.11946	0.70096	40.7015	22.0574	5.63301	27.6904	6.17457	0.707273
	83b071149d677efac3e2add993c4cf2281ab6eadeeab34b8f006c42a79d9e485	30	8.90344	9.59968	1.09961	1.01985	9.23514	4.46488	36.6545	adaa6f51-e798-479b-95c4-4c14fc57301d	0.512306	1.5387	2.051	6.92703	0.793464	28.1288	4.50323	5.74785	10.2511	7.70272	0.882316
	83b071149d677efac3e2add993c4cf2281ab6eadeeab34b8f006c42a79d9e485	31	9.60816	7.32322	0.838846	1.10058	8.42824	4.32536	38.1818	e78018b1-ec19-49ad-8cb8-dc42e594f0e6	2.38602	0.470028	2.85605	4.9912	0.571722	51.5694	3.47627	3.55098	7.02725	8.08523	0.926131
	83b071149d677efac3e2add993c4cf2281ab6eadeeab34b8f006c42a79d9e485	32	4.49411	8.36311	0.957961	0.514782	9.32354	4.46488	38.1818	19f17dcd-a8cf-4132-a207-0ef71368e356	1.18581	0.539694	1.7255	6.41027	0.734271	91.6316	71.3928	7.38606	78.7788	6.29569	0.721147
	83b071149d677efac3e2add993c4cf2281ab6eadeeab34b8f006c42a79d9e485	33	18.8096	8.90643	1.0202	2.15456	9.31596	4.18583	39.7091	1621bd83-3bb6-4b21-a12f-78f09879f23e	0.578024	0.716261	1.29429	7.3835	0.845751	47.9468	20.4843	4.96056	25.4448	7.86265	0.900636
	83b071149d677efac3e2add993c4cf2281ab6eadeeab34b8f006c42a79d9e485	34	6.5032	8.16948	0.935781	0.744916	9.41213	4.46488	38.1818	c99c0402-2ef6-49a8-8529-809da492326e	0.373227	0.5486	0.921827	8.12976	0.931233	46.242	16.4844	36.0006	52.485	6.44635	0.738404
	83b071149d677efac3e2add993c4cf2281ab6eadeeab34b8f006c42a79d9e485	35	-6.10586	7.3623	0.843323	-0.699402	9.13656	3.90677	36.6545	965ab3af-3378-4cd7-b848-ede9c3a4349e	0.415884	0.815006	1.23089	6.60163	0.756191	14.0644	7.61675	6.68193	14.2987	5.80991	0.665502
	83b071149d677efac3e2add993c4cf2281ab6eadeeab34b8f006c42a79d9e485	36	6.82905	7.6954	0.881478	0.78224	9.37624	4.60441	35.1273	e506c999-aca0-49dc-8347-6d128cfccc18	0.582636	3.21258	3.79521	5.6178	0.643497	25.9978	13.0451	6.05023	19.0953	6.54091	0.749236
	83b071149d677efac3e2add993c4cf2281ab6eadeeab34b8f006c42a79d9e485	37	5.06366	8.56566	0.981163	0.580022	9.40754	4.32536	36.6545	3685e526-94b1-460e-b5b7-c026d5f32627	0.466532	0.794665	1.2612	8.27335	0.947679	17.4739	4.33956	4.99497	9.33453	9.08489	1.04064
	83b071149d677efac3e2add993c4cf2281ab6eadeeab34b8f006c42a79d9e485	38	33.7823	11.8031	1.352	3.86963	8.60037	5.30205	36.6545	3ce9c9c0-ea4f-4537-b6c1-4264d5722735	0.434466	1.24339	1.67785	11.3643	1.30174	91.2054	5.77847	5.34891	11.1274	12.1008	1.3861
	83b071149d677efac3e2add993c4cf2281ab6eadeeab34b8f006c42a79d9e485	39	8.42733	7.8637	0.900756	0.965318	9.01086	6.69733	50.4	fde4774d-4db1-47cf-b899-f9e06bc92ad8	0.574528	3.50748	4.08201	6.68754	0.766031	73.5184	10.0604	6.94594	17.0063	6.29649	0.721238
	83b071149d677efac3e2add993c4cf2281ab6eadeeab34b8f006c42a79d9e485	40	2.95287	10.8136	1.23865	0.338239	8.77036	5.30205	45.8182	9fd6599c-969b-4c53-b6ff-b5e1947de1c8	0.656575	1.93234	2.58892	9.98095	1.14328	102.713	17.1331	10.912	28.0451	9.40154	1.07691
	83b071149d677efac3e2add993c4cf2281ab6eadeeab34b8f006c42a79d9e485	41	12.7549	8.76739	1.00427	1.46102	9.04191	4.46488	38.1818	c03d3102-8ed6-4bbb-b99e-5f5ff03c2358	1.03631	1.4723	2.50861	6.02108	0.689691	47.7337	16.4804	8.39231	24.8727	8.69916	0.996454
	83b071149d677efac3e2add993c4cf2281ab6eadeeab34b8f006c42a79d9e485	42	6.15786	6.87706	0.78774	0.705359	9.0468	3.90677	47.3455	eabcb3d0-1008-4855-8495-3c835130baf3	0.684126	0.846659	1.53079	5.41376	0.620125	21.7359	5.84902	17.1026	22.9516	5.7571	0.659454
	83b071149d677efac3e2add993c4cf2281ab6eadeeab34b8f006c42a79d9e485	43	26.5998	9.61696	1.10159	3.0469	8.9853	6.13922	50.4	e42ca075-c40d-43f7-80e6-ce6988086366	1.11058	0.765424	1.876	8.46882	0.97007	131.481	28.8864	20.1982	49.0846	7.73595	0.886123
	83b071149d677efac3e2add993c4cf2281ab6eadeeab34b8f006c42a79d9e485	44	30.5487	11.6372	1.333	3.49923	9.08317	4.74394	38.1818	61ffdc87-a806-4891-b2bb-671a23c40377	0.617251	0.703466	1.32072	11.2584	1.28961	73.5184	16.4705	4.84495	21.3154	12.42	1.42266
	83b071149d677efac3e2add993c4cf2281ab6eadeeab34b8f006c42a79d9e485	45	13.6189	11.9145	1.36476	1.55999	8.87447	5.44158	36.6545	c39ea6cc-0bd6-4f05-b6da-f051e16a49a6	0.638776	1.14046	1.77924	9.50269	1.0885	406.802	186.844	7.9097	194.754	7.72774	0.885182
	83b071149d677efac3e2add993c4cf2281ab6eadeeab34b8f006c42a79d9e485	46	21.4912	13.111	1.50181	2.46174	9.14021	4.88347	36.6545	da8b70f2-fdfb-4e81-94b7-bbabb122b3bb	1.59102	1.05425	2.64527	11.8855	1.36144	112.728	20.659	5.82084	26.4799	13.5952	1.55728
	83b071149d677efac3e2add993c4cf2281ab6eadeeab34b8f006c42a79d9e485	47	19.4807	16.7897	1.92319	2.23144	9.15575	4.88347	39.7091	d91be3c1-fe2b-4828-82c1-fd0ef14a27e4	0.770276	0.546312	1.31659	15.8489	1.81543	99.9424	15.72	6.08928	21.8093	15.3974	1.76371
	83b071149d677efac3e2add993c4cf2281ab6eadeeab34b8f006c42a79d9e485	48	3.07218	16.3618	1.87418	0.351906	9.30344	5.86016	38.1818	100013de-5752-4599-9ddc-d5b420178588	0.739986	1.19295	1.93294	14.6134	1.6739	113.367	9.06489	6.4825	15.5474	14.4589	1.65621
	83b071149d677efac3e2add993c4cf2281ab6eadeeab34b8f006c42a79d9e485	49	13.7885	9.70724	1.11193	1.57942	9.26293	5.02299	45.8182	1696c736-ac72-464d-a195-22a4c9cbdb46	1.57847	1.10153	2.68001	8.10956	0.928918	65.2076	12.4996	7.78054	20.2802	9.72205	1.11362
	83b071149d677efac3e2add993c4cf2281ab6eadeeab34b8f006c42a79d9e485	50	22.0567	12.1292	1.38935	2.52651	9.37694	5.86016	39.7091	fe3cb3de-1c0f-48f0-a56f-95bd4c9a9352	0.863033	0.810492	1.67352	11.475	1.31441	104.417	6.01884	5.19598	11.2148	12.614	1.44488
	83b071149d677efac3e2add993c4cf2281ab6eadeeab34b8f006c42a79d9e485	51	15.9013	8.55908	0.980409	1.82143	10.1496	6.5578	50.4	b657b191-5673-4e24-aa79-6046f9a01344	0.360238	3.12538	3.48562	4.60231	0.527176	54.3397	2.82766	6.46345	9.29111	6.47846	0.742082
	83b071149d677efac3e2add993c4cf2281ab6eadeeab34b8f006c42a79d9e485	52	7.97653	8.62032	0.987423	0.913681	9.96581	4.18583	59.5636	a10eab19-9250-4dd4-9a12-f583c3916d72	0.51977	0.708607	1.22838	6.38408	0.731271	63.7159	14.5643	27.5798	42.1441	6.54671	0.7499
	83b071149d677efac3e2add993c4cf2281ab6eadeeab34b8f006c42a79d9e485	53	14.5005	8.26232	0.946416	1.66097	9.6416	4.88347	42.7636	061d8908-f879-4738-bfcb-c238a6473397	0.488638	0.680529	1.16917	6.31635	0.723513	27.7026	3.19918	30.3214	33.5206	7.31718	0.838154
	83b071149d677efac3e2add993c4cf2281ab6eadeeab34b8f006c42a79d9e485	54	13.2123	10.6997	1.22561	1.51342	9.94336	4.46488	33.6	5bcff97f-7d00-44ef-ac2b-db965cb8db3f	0.491715	1.1298	1.62151	8.77109	1.00469	52.4218	5.29826	2.85044	8.1487	13.0469	1.49447
	83b071149d677efac3e2add993c4cf2281ab6eadeeab34b8f006c42a79d9e485	55	10.1632	8.60434	0.985594	1.16415	10.6206	4.18583	36.6545	1a8560df-adfc-4e93-85f0-9d9b534c3bac	0.495019	0.680702	1.17572	5.94298	0.680745	11.7203	2.65036	3.502	6.15236	7.8087	0.894455
	83b071149d677efac3e2add993c4cf2281ab6eadeeab34b8f006c42a79d9e485	56	19.304	11.1536	1.27761	2.2112	9.23891	5.86016	247.418	d3afd234-3a34-40e9-94df-a5e98227035d	0.677685	1.10669	1.78437	9.54462	1.0933	651.863	18.9503	219.55	238.501	7.0168	0.803747
	83b071149d677efac3e2add993c4cf2281ab6eadeeab34b8f006c42a79d9e485	57	8.70776	10.7459	1.2309	0.99744	9.97429	4.18583	38.1818	305cf017-95ff-42f6-81ac-7d44639794d2	0.466985	0.556675	1.02366	12.9654	1.48514	52.2087	8.78613	7.1705	15.9566	11.7299	1.34361
	83b071149d677efac3e2add993c4cf2281ab6eadeeab34b8f006c42a79d9e485	58	45.0159	16.3404	1.87173	5.15639	10.0693	5.5811	42.7636	6ca89099-f576-4df7-8e85-a553be492cea	0.653335	1.43004	2.08337	13.3877	1.53351	171.117	9.32483	6.65938	15.9842	14.4022	1.64972
	83b071149d677efac3e2add993c4cf2281ab6eadeeab34b8f006c42a79d9e485	59	12.4915	8.34472	0.955855	1.43085	10.4827	3.76725	36.6545	89b24325-5d51-46c7-9e16-6e1e6b601a9b	0.757961	0.599585	1.35755	6.99743	0.801528	56.2575	13.4549	3.65792	17.1128	7.41556	0.849423
	83b071149d677efac3e2add993c4cf2281ab6eadeeab34b8f006c42a79d9e485	60	10.8217	9.74492	1.11624	1.23958	9.63738	5.86016	42.7636	4608db61-075f-4ba0-bf49-5130f2606322	1.40045	1.98999	3.39044	8.43484	0.966177	61.585	4.49098	10.7723	15.2633	8.4357	0.966277
	83b071149d677efac3e2add993c4cf2281ab6eadeeab34b8f006c42a79d9e485	61	14.57	13.3183	1.52556	1.66893	10.4838	5.5811	39.7091	c8a02cb0-5df0-468a-915a-24dc264e7150	1.10764	1.24881	2.35645	10.4352	1.19531	100.155	12.0371	4.39093	16.428	12.3376	1.41323
	83b071149d677efac3e2add993c4cf2281ab6eadeeab34b8f006c42a79d9e485	62	15.7092	10.1424	1.16177	1.79943	10.7604	4.46488	45.8182	d5d12235-9687-45fe-8f2c-64262a1e40e6	1.82533	0.605031	2.43036	8.08901	0.926565	85.6649	26.7553	8.45235	35.2076	8.00255	0.916661
	83b071149d677efac3e2add993c4cf2281ab6eadeeab34b8f006c42a79d9e485	63	7.98635	9.77138	1.11927	0.914805	10.3832	4.18583	44.2909	617fa716-0640-4f9f-996c-de40c6f23823	1.03625	0.961683	1.99793	9.98365	1.14359	94.4018	16.1561	11.7683	27.9244	9.44215	1.08156
	83b071149d677efac3e2add993c4cf2281ab6eadeeab34b8f006c42a79d9e485	64	11.2052	9.91943	1.13623	1.28351	10.7578	5.02299	48.8727	1333ebd4-478e-4509-8f7e-2f696861eb1b	2.06677	1.32493	3.3917	6.74769	0.772921	103.139	4.59989	5.52477	10.1247	9.17746	1.05124
	83b071149d677efac3e2add993c4cf2281ab6eadeeab34b8f006c42a79d9e485	65	13.9433	8.96015	1.02635	1.59716	9.95753	4.74394	38.1818	ea5d6dd9-52c9-4a36-9929-8535ad04c191	0.526098	0.639398	1.1655	6.80993	0.780051	43.2586	50.1833	21.539	71.7224	6.67552	0.764655
	83b071149d677efac3e2add993c4cf2281ab6eadeeab34b8f006c42a79d9e485	66	16.8812	9.13888	1.04682	1.93367	9.91908	3.48819	58.0364	88becdf9-d10b-4888-8610-ad6ba82f9573	0.647456	0.898593	1.54605	6.6615	0.763049	34.3086	2.50374	22.1243	24.628	6.57946	0.753652
	83b071149d677efac3e2add993c4cf2281ab6eadeeab34b8f006c42a79d9e485	67	12.488	11.7005	1.34024	1.43045	10.5608	7.67402	73.3091	eacfd916-3ae4-4d31-8ad5-c8a8df1ff177	0.667827	1.02384	1.69167	8.758	1.00319	414.686	73.2176	38.6904	111.908	7.72636	0.885025
	83b071149d677efac3e2add993c4cf2281ab6eadeeab34b8f006c42a79d9e485	68	12.3964	10.4252	1.19416	1.41995	10.5041	4.88347	59.5636	cb5be632-ff7a-4273-a5b6-e5076f3bc85f	0.543136	1.14399	1.68712	7.32498	0.839048	71.6005	4.52452	21.9883	26.5129	7.84925	0.899101
	83b071149d677efac3e2add993c4cf2281ab6eadeeab34b8f006c42a79d9e485	69	5.904	7.15261	0.819304	0.67628	10.1453	4.88347	50.4	6125f725-e268-4073-af6d-05f59a96727f	1.21506	1.96419	3.17925	5.04368	0.577734	64.1421	14.8847	20.4861	35.3707	5.87494	0.672952
	63d1731f6b402f8ee281dd524820ab635ce817937f866b86357f9ac67ac9c4bc	1	12.2848	13.293	2.22874	2.05971	4.83622	5.05263	44.2909	1a695b52-726a-4ad1-951c-9b027fd64b45	1.04652	1.13967	2.18619	12.0478	2.01997	120.252	5.91285	5.88606	11.7989	14.2571	2.3904
	63d1731f6b402f8ee281dd524820ab635ce817937f866b86357f9ac67ac9c4bc	2	5.96647	6.38508	1.07054	1.00036	6.00141	3.36842	39.7091	11de20cf-74c1-473f-8d7d-b315327182e8	0.411644	0.375138	0.786782	6.39238	1.07177	11.7895	3.49192	3.58625	7.07816	7.46656	1.25187
	63d1731f6b402f8ee281dd524820ab635ce817937f866b86357f9ac67ac9c4bc	3	5.47585	4.7638	0.798714	0.9181	5.18962	3.36842	35.1273	1d3a214b-29f2-44a4-82bc-89e7dfc70adf	0.327328	0.537957	0.865285	4.66376	0.781942	10.5033	31.2294	4.47959	35.709	3.62683	0.608087
	63d1731f6b402f8ee281dd524820ab635ce817937f866b86357f9ac67ac9c4bc	4	5.40374	8.84062	1.48225	0.906009	4.64351	5.61403	44.2909	d48e2ac9-5a78-49ee-976f-7d9b5e091d5e	1.56535	1.36096	2.92631	7.01964	1.17694	150.476	10.8132	11.0354	21.8486	8.48222	1.42216
	63d1731f6b402f8ee281dd524820ab635ce817937f866b86357f9ac67ac9c4bc	5	-1.03427	6.33959	1.06292	-0.17341	6.1461	4.91228	45.8182	80ea5b94-2547-4bf0-88cf-b3b5afda9203	0.84663	0.65837	1.505	5.92631	0.993625	39.2268	7.37221	14.8739	22.2461	5.0393	0.844906
	63d1731f6b402f8ee281dd524820ab635ce817937f866b86357f9ac67ac9c4bc	6	9.84266	9.30451	1.56003	1.65025	4.59771	7.01754	58.0364	a5207766-bca5-4fd2-b4a1-d4a1a2dc0a6a	0.613784	2.85433	3.46811	7.35467	1.23311	258.082	26.0702	14.9414	41.0116	7.43962	1.24735
	63d1731f6b402f8ee281dd524820ab635ce817937f866b86357f9ac67ac9c4bc	7	8.7977	10.3118	1.72892	1.47505	6.07941	5.75438	39.7091	1eb86542-00c0-422c-88b2-611bd8d1e56c	0.695799	0.691088	1.38689	9.16829	1.53719	74.8095	8.36275	6.46095	14.8237	9.62409	1.61361
	63d1731f6b402f8ee281dd524820ab635ce817937f866b86357f9ac67ac9c4bc	8	9.22812	10.0403	1.68339	1.54722	5.91529	4.07017	39.7091	b2ae3579-6ca4-40c0-bdc9-093fb0e3794a	0.848323	0.586436	1.43476	9.64885	1.61776	38.798	4.45884	6.97164	11.4305	10.2679	1.72155
	63d1731f6b402f8ee281dd524820ab635ce817937f866b86357f9ac67ac9c4bc	9	9.86698	5.89664	0.988651	1.65433	5.53502	3.92982	44.2909	04ff47ee-12b7-4403-877d-4b757773261d	0.969802	0.607438	1.57724	4.76176	0.798374	29.5808	3.88957	11.707	15.5966	5.20136	0.872079
	63d1731f6b402f8ee281dd524820ab635ce817937f866b86357f9ac67ac9c4bc	10	6.6733	5.2686	0.883352	1.11887	5.91304	4.07017	41.2364	75f28e16-f3a0-4679-971a-a269cc42da6f	1.27875	1.3262	2.60495	3.6503	0.612022	22.5072	29.9478	11.7381	41.6859	3.74498	0.627896
	63d1731f6b402f8ee281dd524820ab635ce817937f866b86357f9ac67ac9c4bc	11	10.6404	9.06302	1.51954	1.78401	4.54323	3.78947	35.1273	b7bf6413-8518-4b26-9168-485c11e6c778	0.949822	0.814839	1.76466	7.43883	1.24722	44.1569	11.8614	4.70749	16.5689	8.32292	1.39545
	63d1731f6b402f8ee281dd524820ab635ce817937f866b86357f9ac67ac9c4bc	12	10.0522	6.09653	1.02217	1.68538	5.83214	3.22807	41.2364	c98399a1-e3fe-4166-a8cd-a70da6f6d606	0.394679	0.475823	0.870501	4.05738	0.680274	11.7895	2.12102	11.7107	13.8317	4.74701	0.7959
	63d1731f6b402f8ee281dd524820ab635ce817937f866b86357f9ac67ac9c4bc	13	9.20046	8.81321	1.47765	1.54258	5.00967	3.78947	35.1273	eadfa337-6745-41e7-a0e5-504e80d878a8	0.497838	0.625691	1.12353	6.85402	1.14917	14.1474	2.4796	3.44009	5.91969	9.50483	1.59361
	63d1731f6b402f8ee281dd524820ab635ce817937f866b86357f9ac67ac9c4bc	14	21.9768	5.82928	0.977358	3.68471	6.15637	3.64912	39.7091	65ed723e-ea88-45b2-9c86-1a051d0bcd74	1.83628	0.901857	2.73814	5.151	0.863634	18.6488	2.82036	5.27209	8.09246	6.67001	1.11832
	63d1731f6b402f8ee281dd524820ab635ce817937f866b86357f9ac67ac9c4bc	15	15.113	5.02358	0.842271	2.53391	4.46764	3.78947	42.7636	be1ff884-1761-4d50-9cb6-4fa67bf7b7f5	0.544387	0.770836	1.31522	4.40811	0.739079	17.7914	2.2682	5.55002	7.81822	6.97168	1.1689
	63d1731f6b402f8ee281dd524820ab635ce817937f866b86357f9ac67ac9c4bc	16	10.5285	7.14087	1.19726	1.76524	4.82078	5.61403	45.8182	2fce4f5c-474e-48ad-bd0d-963fb25c4f81	0.702331	2.13227	2.8346	5.62208	0.942617	56.8038	11.5165	12.0131	23.5296	6.0853	1.02028
	63d1731f6b402f8ee281dd524820ab635ce817937f866b86357f9ac67ac9c4bc	17	6.47521	4.4786	0.750897	1.08566	4.87027	3.92982	38.1818	5443ee83-cf89-4180-8f9b-be6ebaf200e6	0.316611	0.823121	1.13973	3.89908	0.653734	14.1474	4.7773	3.94787	8.72517	4.44361	0.74503
	63d1731f6b402f8ee281dd524820ab635ce817937f866b86357f9ac67ac9c4bc	18	21.9132	10.0649	1.68751	3.67404	6.432	6.73683	65.6727	8b18a22c-4290-4e7d-9eed-54abe299fb11	0.855316	3.10937	3.96469	6.24235	1.04661	205.351	34.9985	10.1435	45.142	6.04819	1.01406
	63d1731f6b402f8ee281dd524820ab635ce817937f866b86357f9ac67ac9c4bc	19	19.714	16.5487	2.77461	3.30532	6.54431	6.17543	48.8727	14b5c325-ca11-4533-a3ed-d79e13c55a39	1.01439	1.71275	2.72715	16.4196	2.75297	238.361	15.64	7.58841	23.2284	16.9536	2.84251
	63d1731f6b402f8ee281dd524820ab635ce817937f866b86357f9ac67ac9c4bc	20	7.84605	7.35945	1.23391	1.3155	6.21605	3.36842	35.1273	473891e0-a47b-4456-99f2-fac17fe2d75a	0.459975	0.56723	1.02721	5.08943	0.853311	9.43157	2.96366	3.95815	6.92181	6.62303	1.11044
	63d1731f6b402f8ee281dd524820ab635ce817937f866b86357f9ac67ac9c4bc	21	6.15502	6.5501	1.09821	1.03197	6.03133	3.64912	42.7636	d4f323df-b40c-4098-bae1-bae0ba992043	1.0523	1.04548	2.09778	5.23058	0.876977	34.2966	4.40648	4.84846	9.25494	7.8961	1.32389
	63d1731f6b402f8ee281dd524820ab635ce817937f866b86357f9ac67ac9c4bc	22	13.6903	9.31486	1.56176	2.29536	4.65316	5.05263	44.2909	1056d117-81d0-4df4-bd16-37e3d4133dd8	1.0259	0.925042	1.95094	9.65973	1.61958	161.408	17.8957	10.8163	28.712	9.21847	1.5456
	63d1731f6b402f8ee281dd524820ab635ce817937f866b86357f9ac67ac9c4bc	23	5.8571	5.01923	0.841542	0.982022	5.61747	3.78947	38.1818	af6c639f-d951-40c0-981e-db64a1e7d913	0.578872	0.892789	1.47166	3.43012	0.575106	14.5761	2.1031	6.52699	8.63009	4.44532	0.745318
	63d1731f6b402f8ee281dd524820ab635ce817937f866b86357f9ac67ac9c4bc	24	17.0139	20.2741	3.39922	2.85261	6.53231	5.33333	50.4	ecfafec0-ff27-454e-8583-aa892a6699db	0.9744	0.801554	1.77595	19.2473	3.22708	194.205	8.30163	10.0191	18.3208	20.2269	3.39131
	63d1731f6b402f8ee281dd524820ab635ce817937f866b86357f9ac67ac9c4bc	25	0.19181	8.8903	1.49058	0.0321596	6.66966	6.17543	36.6545	124740fc-5f91-482f-8de3-cb0275ffdd45	0.85265	3.05182	3.90447	7.70798	1.29235	166.124	13.2427	5.67627	18.9189	8.62121	1.44546
	63d1731f6b402f8ee281dd524820ab635ce817937f866b86357f9ac67ac9c4bc	26	12.5821	6.42445	1.07715	2.10956	6.64346	3.36842	35.1273	8095b938-283c-4bba-b0ac-d84db7e135ac	0.383125	0.50358	0.886705	6.58689	1.10438	9.86028	5.67416	5.89274	11.5669	5.64701	0.946798
	63d1731f6b402f8ee281dd524820ab635ce817937f866b86357f9ac67ac9c4bc	27	9.32209	6.14108	1.02963	1.56297	6.29987	4.91228	36.6545	adb7ee49-1eeb-4f69-af70-c8ef82fd586b	0.319719	2.12067	2.44039	4.46451	0.748534	26.7942	3.97881	5.23071	9.20952	4.65514	0.780498
	63d1731f6b402f8ee281dd524820ab635ce817937f866b86357f9ac67ac9c4bc	28	11.9968	5.30728	0.889838	2.01143	6.29989	3.78947	33.6	5fc6cce8-36dc-40ad-b519-d18a1fc02a79	0.577759	1.03428	1.61204	3.99888	0.670467	49.7301	30.7642	29.1567	59.9209	4.67677	0.784123
	63d1731f6b402f8ee281dd524820ab635ce817937f866b86357f9ac67ac9c4bc	29	7.69386	4.94591	0.829249	1.28998	5.09203	3.92982	53.4545	51ca805a-ab9d-48b9-a89b-f116829527aa	3.17654	0.59006	3.7666	3.82579	0.641445	46.7291	2.92677	12.3508	15.2775	4.86419	0.815547
	63d1731f6b402f8ee281dd524820ab635ce817937f866b86357f9ac67ac9c4bc	30	8.09287	6.38489	1.07051	1.35688	6.70497	3.36842	36.6545	ecbd8452-d96c-4fc1-8cea-f20df0897729	0.333504	0.495694	0.829198	5.84672	0.980281	9.86028	6.61502	8.31863	14.9336	5.21826	0.874912
	63d1731f6b402f8ee281dd524820ab635ce817937f866b86357f9ac67ac9c4bc	31	5.26012	6.03385	1.01166	0.881929	6.6199	4.91228	47.3455	8e2997a2-e6a7-45f1-a390-ce36815cc7d1	1.4994	0.702613	2.20202	4.57551	0.767145	47.8009	4.95693	5.62142	10.5784	6.17512	1.03534
	63d1731f6b402f8ee281dd524820ab635ce817937f866b86357f9ac67ac9c4bc	32	10.8352	5.96828	1.00066	1.81667	5.75758	4.07017	39.7091	17a0b560-3eac-475a-a818-bb91aebcbe3a	0.349222	0.831054	1.18028	4.70058	0.788115	13.933	2.6423	3.95719	6.5995	6.4326	1.07851
	63d1731f6b402f8ee281dd524820ab635ce817937f866b86357f9ac67ac9c4bc	33	6.45136	6.69236	1.12206	1.08166	6.71901	3.50877	36.6545	4a25e961-45ab-43a5-b679-49db325dd90a	0.571073	2.2001	2.77118	4.21128	0.706077	12.6469	3.03959	3.49005	6.52964	6.06694	1.0172
	63d1731f6b402f8ee281dd524820ab635ce817937f866b86357f9ac67ac9c4bc	34	5.11917	5.60413	0.939607	0.858297	6.52883	4.35087	41.2364	792cd54a-fecf-422d-88a8-5e236b83885f	0.829808	1.03161	1.86142	4.80498	0.80562	65.5923	25.3041	30.5689	55.8729	5.33608	0.894666
	63d1731f6b402f8ee281dd524820ab635ce817937f866b86357f9ac67ac9c4bc	35	5.06338	7.065	1.18454	0.848944	6.53474	5.05263	59.5636	6878b52f-5945-42be-b148-e09323e1f4b8	0.405027	0.706169	1.1112	5.64601	0.94663	89.3855	62.7854	6.85423	69.6396	5.02972	0.8433
	63d1731f6b402f8ee281dd524820ab635ce817937f866b86357f9ac67ac9c4bc	36	8.09317	6.83259	1.14558	1.35693	6.59321	5.61403	39.7091	2d04f304-5da1-4e7b-b481-fa6cbbf49cfc	0.503427	0.66417	1.1676	5.56641	0.933284	80.3827	7.03703	9.81988	16.8569	5.21722	0.874737
	63d1731f6b402f8ee281dd524820ab635ce817937f866b86357f9ac67ac9c4bc	37	2.20814	5.9662	1.00031	0.370224	6.33312	3.64912	42.7636	aa69eaaa-816c-4baa-9be9-a3df788ab4ed	0.456078	0.420988	0.877066	5.7869	0.970251	27.0086	14.1288	9.69283	23.8216	4.90801	0.822895
	63d1731f6b402f8ee281dd524820ab635ce817937f866b86357f9ac67ac9c4bc	38	16.1937	6.4482	1.08113	2.71509	6.81038	4.07017	33.6	5e69ecf1-60db-4fdb-b65f-c90ae67b2366	0.551437	1.1731	1.72454	5.16655	0.866241	34.2966	4.23745	3.27984	7.51729	7.72421	1.29507
	63d1731f6b402f8ee281dd524820ab635ce817937f866b86357f9ac67ac9c4bc	39	15.8238	7.33829	1.23036	2.65307	6.47952	4.63157	39.7091	ce9a1925-57c1-417f-a87b-92ddf7019504	1.06091	1.45621	2.51713	6.88634	1.15459	66.2353	14.0638	9.30151	23.3653	7.42697	1.24523
	63d1731f6b402f8ee281dd524820ab635ce817937f866b86357f9ac67ac9c4bc	40	9.89191	9.68515	1.62385	1.65851	6.47983	4.63157	36.6545	d038ccab-8e52-4c9b-9438-237349ab8180	0.850921	0.870723	1.72164	7.6818	1.28796	39.8698	3.78433	3.96949	7.75382	10.6199	1.78057
	63d1731f6b402f8ee281dd524820ab635ce817937f866b86357f9ac67ac9c4bc	41	-0.0996971	7.23052	1.21229	-0.0167156	6.95948	3.92982	35.1273	47c052d0-3b51-479b-a4d4-86d4055e99d9	0.335985	0.469588	0.805573	6.18316	1.03669	17.1483	9.73181	7.21097	16.9428	4.2869	0.718757
	63d1731f6b402f8ee281dd524820ab635ce817937f866b86357f9ac67ac9c4bc	42	14.3165	11.6922	1.96036	2.40035	6.81503	5.19298	61.0909	b8be96f2-3255-4ceb-9bf0-d4a54d59d1d8	0.795466	0.899004	1.69447	12.5471	2.10368	459.36	16.6735	8.73434	25.4079	12.1475	2.03669
	63d1731f6b402f8ee281dd524820ab635ce817937f866b86357f9ac67ac9c4bc	43	14.625	10.9274	1.83212	2.45208	7.06305	5.89473	38.1818	015dea0d-3c2d-4264-af2f-0f92f94c299b	0.665818	0.740502	1.40632	10.0437	1.68397	82.3119	11.5651	8.70313	20.2682	9.47088	1.58792
	63d1731f6b402f8ee281dd524820ab635ce817937f866b86357f9ac67ac9c4bc	44	5.36611	11.7004	1.96172	0.8997	6.92988	4.63157	44.2909	2dd3ea35-4d32-4224-8a2a-09b40d140471	0.901222	0.611321	1.51254	10.003	1.67714	135.9	33.8985	7.68369	41.5822	9.62207	1.61327
	63d1731f6b402f8ee281dd524820ab635ce817937f866b86357f9ac67ac9c4bc	45	4.30171	9.14404	1.53312	0.72124	6.95169	4.91228	41.2364	51cc346d-5b1a-447d-97e0-0b3fa0b789ef	0.569777	0.586486	1.15626	10.586	1.77489	99.6745	5.277	8.14801	13.425	10.0363	1.68273
	63d1731f6b402f8ee281dd524820ab635ce817937f866b86357f9ac67ac9c4bc	46	6.51563	10.1291	1.69828	1.09243	6.99042	4.49122	42.7636	21c88a24-8e06-450e-84e4-be828b489dc1	2.00101	1.04869	3.0497	8.4424	1.41548	83.598	10.25	4.17998	14.43	10.6228	1.78106
	63d1731f6b402f8ee281dd524820ab635ce817937f866b86357f9ac67ac9c4bc	47	13.8852	8.51162	1.42709	2.32804	6.56583	4.21052	39.7091	3133ae5b-9a1d-42fe-900c-fe12633b9347	0.398032	0.815162	1.21319	6.66782	1.11795	25.9368	2.97819	5.74356	8.72175	7.85917	1.3177
	63d1731f6b402f8ee281dd524820ab635ce817937f866b86357f9ac67ac9c4bc	48	23.8391	12.1897	2.04378	3.99695	6.67182	4.77192	42.7636	57f7e743-d266-4834-91e8-8d6b7c912bc1	0.853892	0.975764	1.82966	10.3939	1.74268	181.558	17.8048	10.3099	28.1146	9.85898	1.65299
	63d1731f6b402f8ee281dd524820ab635ce817937f866b86357f9ac67ac9c4bc	49	4.06636	6.73389	1.12903	0.681779	7.27085	6.87719	42.7636	7d5eede0-268f-4822-bf2a-1899cf5458ec	1.25668	1.48182	2.7385	6.01477	1.00846	121.324	7.06277	6.59508	13.6578	6.59874	1.10637
	63d1731f6b402f8ee281dd524820ab635ce817937f866b86357f9ac67ac9c4bc	50	0.328509	9.99394	1.67562	0.055079	7.02301	4.35087	50.4	f16f2560-b09a-4f19-a79a-1592ae8cb313	1.1831	1.05217	2.23527	8.71716	1.46155	136.115	14.3058	12.6289	26.9346	8.87926	1.48873
	63d1731f6b402f8ee281dd524820ab635ce817937f866b86357f9ac67ac9c4bc	51	1.87144	7.52649	1.26192	0.313772	7.36371	5.33333	67.2	69d11a02-516c-411a-888c-8cd43fb658a2	1.64115	0.779561	2.42071	5.92141	0.992805	135.257	16.6605	37.3896	54.0501	6.18448	1.03691
	63d1731f6b402f8ee281dd524820ab635ce817937f866b86357f9ac67ac9c4bc	52	0.827367	6.35337	1.06523	0.138719	7.47544	4.63157	33.6	3adbc771-e2b1-4952-936f-34dfc979d3db	0.400633	1.05316	1.45379	5.83116	0.977672	25.2938	7.12583	4.22892	11.3547	5.74231	0.962775
	63d1731f6b402f8ee281dd524820ab635ce817937f866b86357f9ac67ac9c4bc	53	-4.00058	7.80169	1.30806	-0.670751	6.67598	4.91228	50.4	662dcf1a-9fc2-47df-a34e-2ee1126ec27f	2.03055	1.00254	3.0331	6.11718	1.02563	82.5262	4.1598	38.0313	42.1911	7.00167	1.17392
	63d1731f6b402f8ee281dd524820ab635ce817937f866b86357f9ac67ac9c4bc	54	2.30901	8.61775	1.44488	0.387136	7.08799	4.21052	39.7091	68a07d88-dde2-4651-8a24-3f80362b7c47	0.510795	1.08322	1.59401	6.97694	1.16978	59.8047	8.39277	5.3611	13.7539	8.70151	1.45893
	9a950bd6e3ffb2a841f93234eb693464f9ab1817accf8274b3e15ae87f780a28	1	6.47789	8.55788	0.903205	0.683681	8.3192	5.49217	54.9818	c74ded31-f1c0-4348-b907-8cfd451eaa18	0.367454	0.768099	1.13555	8.25959	0.871724	91.6233	5.25285	12.0799	17.3327	7.53486	0.795235
	9a950bd6e3ffb2a841f93234eb693464f9ab1817accf8274b3e15ae87f780a28	2	9.63858	8.97863	0.947611	1.01726	8.48501	5.77382	41.2364	068f5896-3457-43e3-99b5-78ae5363c7a3	0.695204	2.73836	3.43357	5.19319	0.548093	94.2042	6.35274	36.0628	42.4156	6.33583	0.668689
	9a950bd6e3ffb2a841f93234eb693464f9ab1817accf8274b3e15ae87f780a28	3	11.0688	21.3172	2.24984	1.16821	8.14379	7.18207	56.5091	ae784ab3-ba59-4d15-9cc0-817d2581b671	0.795372	1.71493	2.51031	17.7951	1.87811	347.566	7.02981	21.4838	28.5137	19.3206	2.03911
	9a950bd6e3ffb2a841f93234eb693464f9ab1817accf8274b3e15ae87f780a28	4	0.320853	7.29391	0.769805	0.0338631	8.34863	4.22475	58.0364	2f8119e9-1d12-48a4-817a-df1985782794	1.08018	0.489201	1.56938	5.59682	0.590693	58.2862	4.20872	21.5129	25.7217	7.63387	0.805684
	9a950bd6e3ffb2a841f93234eb693464f9ab1817accf8274b3e15ae87f780a28	5	-3.65836	6.08128	0.641823	-0.386106	8.26573	4.22475	33.6	7d2c7bd2-b150-4ca2-956a-87a38a30dbab	1.15378	0.613786	1.76756	4.78232	0.50473	56.7806	3.91213	32.0908	36.003	6.26213	0.66091
	9a950bd6e3ffb2a841f93234eb693464f9ab1817accf8274b3e15ae87f780a28	6	6.43899	6.62324	0.699022	0.679576	7.5286	3.52062	35.1273	6b201175-f710-404a-893d-8e4fc86ecb6e	0.386494	0.63053	1.01702	5.11682	0.540033	13.1198	6.01312	3.21237	9.22549	5.52739	0.583365
	9a950bd6e3ffb2a841f93234eb693464f9ab1817accf8274b3e15ae87f780a28	7	18.4253	8.19401	0.864802	1.94462	8.38162	6.7596	42.7636	e8369e11-1047-404d-b6ef-ec302251847f	0.414781	1.08142	1.4962	7.34872	0.77559	67.3195	5.29851	5.56502	10.8635	7.40524	0.781555
	9a950bd6e3ffb2a841f93234eb693464f9ab1817accf8274b3e15ae87f780a28	8	27.3721	12.1879	1.28632	2.88888	8.20993	4.22475	82.4727	f7f55335-e030-4d8c-b2fa-a026159649a4	1.68199	1.12336	2.80535	9.33311	0.985024	422.414	9.13269	11.0193	20.152	11.099	1.1714
	9a950bd6e3ffb2a841f93234eb693464f9ab1817accf8274b3e15ae87f780a28	9	8.53497	8.52268	0.89949	0.900787	8.1072	4.08392	41.2364	2c527ea8-1dd2-46f0-85c3-d3bf000d9ec5	0.602222	0.552676	1.1549	10.0005	1.05546	61.0822	16.7437	9.86696	26.6107	9.21512	0.972571
	9a950bd6e3ffb2a841f93234eb693464f9ab1817accf8274b3e15ae87f780a28	10	6.61539	6.51981	0.688106	0.698193	8.69423	3.66145	42.7636	9bc712fc-9523-4ee1-b3e8-bcede9a46bee	0.409346	0.500591	0.909937	6.61778	0.698445	25.5943	3.53082	11.8383	15.3691	7.12684	0.752172
	9a950bd6e3ffb2a841f93234eb693464f9ab1817accf8274b3e15ae87f780a28	11	13.4333	12.1435	1.28163	1.41776	9.24435	6.05547	36.6545	ff33b7db-84e0-4197-875e-a3680a21fb39	0.733654	0.829302	1.56296	12.4589	1.31492	170.772	22.7128	4.45291	27.1657	12.2052	1.28814
	9a950bd6e3ffb2a841f93234eb693464f9ab1817accf8274b3e15ae87f780a28	12	10.7888	6.71235	0.708426	1.13866	8.03762	7.74537	44.2909	e48f9401-f902-4b9f-bb26-c1e0c16b34c2	2.59104	4.57563	7.16667	4.91334	0.518558	66.4592	2.7644	4.78771	7.55212	6.89107	0.727288
	9a950bd6e3ffb2a841f93234eb693464f9ab1817accf8274b3e15ae87f780a28	13	10.124	8.13122	0.858176	1.0685	7.85452	3.80227	41.2364	5c81e0ca-b73c-478b-a07f-a641487cb094	1.41346	0.710461	2.12393	6.46574	0.682399	87.1067	21.0126	8.27674	29.2893	6.94944	0.733449
	9a950bd6e3ffb2a841f93234eb693464f9ab1817accf8274b3e15ae87f780a28	14	7.80029	6.97006	0.735625	0.823248	8.51498	6.05547	35.1273	903f5088-b41c-4fd6-b529-f8fd11f08082	0.501128	0.705976	1.2071	5.17848	0.546541	33.122	4.16134	3.69108	7.85242	6.49547	0.685537
	9a950bd6e3ffb2a841f93234eb693464f9ab1817accf8274b3e15ae87f780a28	15	5.20622	10.5466	1.1131	0.549468	9.48235	5.0697	42.7636	a2629260-0fbe-4cd7-a68f-9926ec50acf1	2.03038	0.68606	2.71644	9.88548	1.04332	115.282	10.1523	11.1266	21.2789	9.45746	0.998147
	9a950bd6e3ffb2a841f93234eb693464f9ab1817accf8274b3e15ae87f780a28	16	12.6443	6.93234	0.731644	1.33449	10.1567	3.80227	41.2364	223a51c5-1d01-48e9-865e-10830042d795	1.08083	1.09102	2.17185	4.97038	0.524578	25.1641	4.19269	5.26447	9.45716	7.06655	0.745809
	9a950bd6e3ffb2a841f93234eb693464f9ab1817accf8274b3e15ae87f780a28	17	10.2936	7.56857	0.798793	1.0864	9.65145	3.9431	35.1273	1671f845-ff2b-4d18-b306-ddbfbfc55084	1.69992	1.2824	2.98232	4.45693	0.470388	16.1309	4.10294	4.28926	8.3922	6.90758	0.729031
	9a950bd6e3ffb2a841f93234eb693464f9ab1817accf8274b3e15ae87f780a28	18	17.9256	9.10028	0.96045	1.89188	8.29795	3.9431	41.2364	91209406-397b-481e-93a3-58f51f9ddd79	0.870702	0.813692	1.68439	7.1665	0.756358	85.386	4.47604	8.54559	13.0216	8.55248	0.902636
	9a950bd6e3ffb2a841f93234eb693464f9ab1817accf8274b3e15ae87f780a28	19	15.1842	13.3383	1.40773	1.60256	8.65007	5.49217	38.1818	2e0d47c4-36b9-469b-9b7d-47b9a5a8368b	1.05615	1.45267	2.50881	11.7243	1.23739	133.994	9.86455	5.51809	15.3826	12.885	1.35989
	9a950bd6e3ffb2a841f93234eb693464f9ab1817accf8274b3e15ae87f780a28	20	13.3582	12.04	1.27071	1.40983	8.7345	5.35135	245.891	0fd59fac-6928-4fdd-9cdb-e375f0e9def0	1.25419	0.723465	1.97766	8.22748	0.868334	658.784	47.7971	221.789	269.587	6.16147	0.650287
	9a950bd6e3ffb2a841f93234eb693464f9ab1817accf8274b3e15ae87f780a28	21	3.76266	7.12749	0.752241	0.397114	9.26277	3.52062	36.6545	d3755fc9-cdb0-4d71-817d-5648d11d9d03	0.823135	0.516076	1.33921	5.05175	0.533166	13.1198	2.22679	4.81492	7.04171	6.83238	0.721094
	9a950bd6e3ffb2a841f93234eb693464f9ab1817accf8274b3e15ae87f780a28	22	9.0525	7.16941	0.756665	0.955408	8.69638	3.52062	42.7636	7443d740-4323-4c8e-b476-2a000cd4a31d	1.66004	0.966154	2.6262	4.38133	0.462408	35.703	3.76805	28.0288	31.7968	7.09262	0.748561
	9a950bd6e3ffb2a841f93234eb693464f9ab1817accf8274b3e15ae87f780a28	23	18.7302	11.3035	1.19298	1.9768	10.1073	5.35135	41.2364	342884ee-c9eb-4f9e-9b53-680d2e3032b0	1.00399	1.28972	2.29371	9.93668	1.04872	174.213	47.743	8.69438	56.4373	9.53563	1.0064
	9a950bd6e3ffb2a841f93234eb693464f9ab1817accf8274b3e15ae87f780a28	24	26.2321	11.9454	1.26073	2.76856	9.29775	5.49217	56.5091	2e3bcb8b-9e71-40c5-a387-aaa5520d1bbd	0.524226	0.6625	1.18673	12.2071	1.28834	110.98	4.00286	7.94153	11.9444	12.9952	1.37153
	9a950bd6e3ffb2a841f93234eb693464f9ab1817accf8274b3e15ae87f780a28	25	16.6866	10.1515	1.0714	1.76112	9.3807	3.66145	41.2364	f540ace9-cdc0-4738-a773-7bdc47117614	0.624926	0.438563	1.06349	10.27	1.0839	73.3417	32.2559	10.5222	42.7781	9.3217	0.98382
	9a950bd6e3ffb2a841f93234eb693464f9ab1817accf8274b3e15ae87f780a28	26	14.6178	8.6441	0.912305	1.54277	9.38168	4.36557	41.2364	7d1b4cea-703a-4c9e-bab7-c13b947eb290	0.405759	1.35221	1.75797	7.52932	0.794651	34.4125	4.59913	12.2709	16.87	7.51154	0.792774
	9a950bd6e3ffb2a841f93234eb693464f9ab1817accf8274b3e15ae87f780a28	27	5.68926	9.4581	0.998215	0.600449	9.37774	3.80227	90.1091	39cd94e8-7b6f-44b8-87d2-c294f98161f8	0.612044	0.461731	1.07377	7.31851	0.772401	117.003	19.8249	85.4114	105.236	5.40454	0.570399
	9a950bd6e3ffb2a841f93234eb693464f9ab1817accf8274b3e15ae87f780a28	28	9.89597	8.84494	0.933502	1.04443	10.6746	5.633	38.1818	eef90d72-f9d5-4d69-b1fe-5de3f8882a96	0.581677	1.33713	1.9188	7.69723	0.812371	102.592	31.6003	7.90199	39.5023	7.52189	0.793866
	9a950bd6e3ffb2a841f93234eb693464f9ab1817accf8274b3e15ae87f780a28	29	6.87308	11.0023	1.16119	0.72539	10.6574	5.49217	42.7636	8f6872c6-928c-47a1-847f-f2c2698c2d7d	0.676075	2.22023	2.8963	8.50516	0.897641	92.2685	15.5059	5.66668	21.1726	9.8108	1.03544
	9a950bd6e3ffb2a841f93234eb693464f9ab1817accf8274b3e15ae87f780a28	30	19.8404	9.92551	1.04755	2.09397	11.2044	4.78805	41.2364	8837918b-4ae9-4e4e-a113-c850054b42ae	0.648929	0.697282	1.34621	8.58665	0.906242	76.1377	29.9136	11.1486	41.0622	7.82424	0.825776
	9a950bd6e3ffb2a841f93234eb693464f9ab1817accf8274b3e15ae87f780a28	31	6.67789	7.82057	0.825389	0.70479	11.2713	3.3798	42.7636	2da06537-6456-4b2e-a119-efdd28bafdb3	0.698508	0.713364	1.41187	6.01312	0.63463	28.3903	8.89966	15.2749	24.1745	5.79706	0.611826
	9a950bd6e3ffb2a841f93234eb693464f9ab1817accf8274b3e15ae87f780a28	32	-1.10795	8.57817	0.905347	-0.116934	11.1991	4.92887	36.6545	6e640067-9c0b-41b7-8a8f-dd66072ed928	0.357102	0.584855	0.941956	9.55159	1.00808	26.4546	3.9672	5.21454	9.18174	9.00056	0.949926
	9a950bd6e3ffb2a841f93234eb693464f9ab1817accf8274b3e15ae87f780a28	33	-0.618037	7.38905	0.779847	-0.0652281	9.56093	3.9431	39.7091	c6e12662-3027-41de-bd9b-22e2a3cc4666	0.417424	0.979365	1.39679	7.04741	0.743789	26.0245	8.67881	6.84406	15.5229	6.7017	0.707302
	9a950bd6e3ffb2a841f93234eb693464f9ab1817accf8274b3e15ae87f780a28	34	10.6063	7.28919	0.769307	1.11939	9.83711	5.49217	36.6545	7608d267-287d-4a8a-a66d-f0a9ed9e4691	0.377775	1.58206	1.95983	6.32065	0.667086	41.0799	3.96827	3.64426	7.61253	7.70195	0.81287
	9a950bd6e3ffb2a841f93234eb693464f9ab1817accf8274b3e15ae87f780a28	35	18.3293	9.27418	0.978804	1.93449	9.6685	4.64722	44.2909	31c353b0-6e83-4414-93a1-dccd374484c1	0.447447	1.50362	1.95107	6.1319	0.647165	44.7363	24.1149	7.24383	31.3588	6.46978	0.682825
	9a950bd6e3ffb2a841f93234eb693464f9ab1817accf8274b3e15ae87f780a28	36	1.7236	6.65601	0.70248	0.18191	9.65068	3.52062	41.2364	857cdbc9-ed70-4260-9182-fc32b8cd189b	0.795866	0.46211	1.25798	6.1233	0.646257	30.326	6.40139	39.6111	46.0125	5.83087	0.615394
	9a950bd6e3ffb2a841f93234eb693464f9ab1817accf8274b3e15ae87f780a28	37	9.53255	7.40668	0.781707	1.00607	9.73933	3.3798	36.6545	5764e22e-7fe4-47ff-9433-17d9a9a82c49	0.339013	0.3283	0.667312	8.01278	0.845675	9.8936	3.60707	6.26215	9.86922	6.32491	0.667536
	9a950bd6e3ffb2a841f93234eb693464f9ab1817accf8274b3e15ae87f780a28	38	17.176	10.2526	1.08207	1.81277	10.1753	4.92887	42.7636	0a4c476d-ec7a-4f56-8d06-edb11ffa8c44	0.886227	1.7068	2.59303	7.00006	0.738792	85.8162	17.6699	11.4446	29.1144	7.89408	0.833148
	9a950bd6e3ffb2a841f93234eb693464f9ab1817accf8274b3e15ae87f780a28	39	8.43154	9.06949	0.957201	0.889872	9.75897	3.3798	35.1273	3b15cede-8642-4a71-bd4e-31dd29d4acf3	0.369752	0.667864	1.03762	6.43764	0.679434	13.3348	3.42226	4.50806	7.93032	7.36006	0.776787
	9a950bd6e3ffb2a841f93234eb693464f9ab1817accf8274b3e15ae87f780a28	40	7.80012	8.40033	0.886578	0.82323	11.2021	4.78805	54.9818	b79e3706-cadc-4218-ab60-50697f0c3e8a	0.641944	0.895568	1.53751	7.55464	0.797323	104.098	7.60963	22.9212	30.5308	7.31752	0.772296
	9a950bd6e3ffb2a841f93234eb693464f9ab1817accf8274b3e15ae87f780a28	41	11.2585	9.39014	0.991043	1.18823	9.97589	4.36557	39.7091	734c9fc6-866f-4271-aaee-9ecc32d73c91	0.644974	1.15187	1.79685	5.74233	0.60605	30.326	3.74935	7.21066	10.96	6.98291	0.736982
	9a950bd6e3ffb2a841f93234eb693464f9ab1817accf8274b3e15ae87f780a28	42	11.3493	7.62224	0.804457	1.19781	9.87984	3.66145	39.7091	ee7ab949-c900-4a16-975a-a8e808c51dde	0.271687	0.484404	0.75609	7.35393	0.77614	11.3991	3.81839	4.35491	8.17331	6.23652	0.658207
	9a950bd6e3ffb2a841f93234eb693464f9ab1817accf8274b3e15ae87f780a28	43	6.84301	8.78009	0.926658	0.722217	10.5125	3.80227	36.6545	9edf7636-ed0b-4fc1-9d74-8b2b64941b3c	0.414121	0.47909	0.893211	9.91968	1.04693	36.9934	16.1405	9.13664	25.2771	8.12666	0.857694
	55df5add6505a2458e13e0d88f8142b2ef4ff6eaa9bf3c9b6bba31910d31f2ce	1	9.01599	5.73984	1.18873	1.86722	4.52898	3.36642	35.1273	b0be7e96-9df4-4351-a3c9-10d870e7d521	0.341102	0.339094	0.680196	5.55394	1.15023	18.852	15.0604	4.21498	19.2754	4.81688	0.99758
	55df5add6505a2458e13e0d88f8142b2ef4ff6eaa9bf3c9b6bba31910d31f2ce	2	5.88546	4.55521	0.943388	1.21888	4.66888	3.50669	35.1273	1459841e-3197-41bd-9b2d-027564b0f2bf	0.530561	0.758931	1.28949	4.1338	0.856114	10.7113	6.7506	5.11202	11.8626	3.75081	0.776796
	55df5add6505a2458e13e0d88f8142b2ef4ff6eaa9bf3c9b6bba31910d31f2ce	3	6.923	5.51978	1.14315	1.43376	5.16669	4.06776	35.1273	a3e2f9d1-f224-417a-881f-53c520578e5b	0.526728	1.0631	1.58982	5.16952	1.07061	41.9885	19.8028	4.8347	24.6375	5.99047	1.24063
	55df5add6505a2458e13e0d88f8142b2ef4ff6eaa9bf3c9b6bba31910d31f2ce	4	0.9075	5.6415	1.16836	0.187944	5.7273	3.36642	41.2364	3cc0f77e-ae10-45b9-93c3-ad2175cd49e5	0.402872	0.398695	0.801568	4.94813	1.02476	11.1398	2.24551	5.75448	7.99999	5.9339	1.22892
	55df5add6505a2458e13e0d88f8142b2ef4ff6eaa9bf3c9b6bba31910d31f2ce	5	-0.911173	4.57362	0.947201	-0.188705	4.53324	3.64696	39.7091	65cc8c3f-8062-41a6-ba93-bbed44e62207	1.83808	0.647077	2.48516	3.58742	0.742958	25.2788	2.8016	4.38487	7.18647	5.56947	1.15344
	55df5add6505a2458e13e0d88f8142b2ef4ff6eaa9bf3c9b6bba31910d31f2ce	6	13.1732	6.54004	1.35445	2.72819	4.59543	5.6107	45.8182	776fa48b-999c-4283-b969-a295304f94fd	0.419189	0.917344	1.33653	7.30231	1.51232	66.8388	10.2945	9.83435	20.1289	6.74019	1.3959
	55df5add6505a2458e13e0d88f8142b2ef4ff6eaa9bf3c9b6bba31910d31f2ce	7	15.9057	6.27244	1.29903	3.29409	4.35829	3.92749	38.1818	27fac98a-dc1f-4311-91c2-52bbb39fa970	1.1576	1.13307	2.29067	4.79557	0.993167	64.6965	6.03552	7.19755	13.2331	5.95951	1.23422
	55df5add6505a2458e13e0d88f8142b2ef4ff6eaa9bf3c9b6bba31910d31f2ce	8	5.06316	6.10218	1.26377	1.04859	5.55712	3.78722	35.1273	29deb5b6-9837-4456-8061-f967df4b0c28	0.29568	0.731405	1.02708	5.87783	1.2173	12.6394	6.90546	3.96035	10.8658	5.35008	1.10801
	55df5add6505a2458e13e0d88f8142b2ef4ff6eaa9bf3c9b6bba31910d31f2ce	9	-0.508924	5.14496	1.06553	-0.105399	4.79867	3.78722	42.7636	d456b495-692d-4e54-bb9d-01d39e7ba9bf	0.566337	0.919159	1.4855	5.19826	1.07657	41.56	19.1082	12.6579	31.7661	4.08737	0.846499
	55df5add6505a2458e13e0d88f8142b2ef4ff6eaa9bf3c9b6bba31910d31f2ce	10	0.36427	5.34774	1.10752	0.0754406	4.8185	4.20803	47.3455	cdf41fa2-4a70-473d-b707-0d54cc0c21ce	0.440768	0.441941	0.882709	4.66992	0.967145	39.8462	12.6421	6.9107	19.5528	4.78629	0.991245
	55df5add6505a2458e13e0d88f8142b2ef4ff6eaa9bf3c9b6bba31910d31f2ce	11	14.6159	5.31466	1.10067	3.02697	4.82083	4.06776	38.1818	874f0f6f-0bf2-49b5-8e6d-ff9816d9a1bb	0.813773	0.497548	1.31132	5.87513	1.21675	21.6369	7.42642	5.48179	12.9082	5.2549	1.08829
	55df5add6505a2458e13e0d88f8142b2ef4ff6eaa9bf3c9b6bba31910d31f2ce	12	1.38004	6.07402	1.25794	0.285807	5.44235	3.78722	36.6545	5ce0877a-21a2-4079-b01a-8bf24a08b54c	1.06917	0.841581	1.91075	5.32058	1.1019	32.7767	12.344	4.11485	16.4589	6.21956	1.28808
	55df5add6505a2458e13e0d88f8142b2ef4ff6eaa9bf3c9b6bba31910d31f2ce	13	12.5004	4.98638	1.03268	2.58885	5.4095	3.78722	50.4	6a721fc1-a408-4846-b967-eb46fbe05623	0.672806	0.730403	1.40321	5.50859	1.14083	47.9868	8.15296	20.3427	28.4956	4.94775	1.02468
	55df5add6505a2458e13e0d88f8142b2ef4ff6eaa9bf3c9b6bba31910d31f2ce	14	14.3854	6.10481	1.26431	2.97922	5.60743	4.7691	48.8727	e278bba0-ec0b-4daa-b7ea-d9975163b965	0.87898	0.486705	1.36568	5.65746	1.17167	67.4815	5.41055	8.90476	14.3153	5.57539	1.15467
	ccac98fdc666668233e0f74a9fbef00adc37e4fc42f82551ee9811febd9eee26	1	8.54238	5.02194	1.62006	2.75574	3.20908	5.4494	79.4182	4720604e-ab69-446a-aa8e-ffc1a3c76529	2.77392	1.37054	4.14445	3.91382	1.26258	85.5391	30.1532	36.3304	66.4836	3.74759	1.20896
	ccac98fdc666668233e0f74a9fbef00adc37e4fc42f82551ee9811febd9eee26	2	4.14948	5.69467	1.83708	1.33861	3.18409	6.66038	47.3455	874eaf34-dd1e-4890-bba1-ce174bb3d2cf	1.18684	2.89932	4.08615	3.85858	1.24476	122.298	36.2476	18.3391	54.5867	4.0461	1.30526
	ccac98fdc666668233e0f74a9fbef00adc37e4fc42f82551ee9811febd9eee26	3	8.08021	6.26409	2.02077	2.60664	3.2071	4.23842	42.7636	30671ef9-b96a-45db-83ad-6600eacf9523	2.17375	0.798695	2.97245	4.63869	1.49642	145.185	23.5593	3.88294	27.4422	5.27848	1.70282
	ccac98fdc666668233e0f74a9fbef00adc37e4fc42f82551ee9811febd9eee26	4	-1.02507	5.86805	1.89301	-0.330684	3.30297	4.54117	39.7091	8583a24b-c78d-4736-9800-328038fae2a4	0.32056	0.483343	0.803903	5.01704	1.61848	19.1885	3.26887	5.47612	8.74499	4.56776	1.47354
	ccac98fdc666668233e0f74a9fbef00adc37e4fc42f82551ee9811febd9eee26	5	10.268	5.20389	1.67876	3.31241	2.81782	3.63293	41.2364	b8bf6d76-b880-415d-9325-23a42e9b59cf	2.49595	0.933539	3.42948	3.66611	1.18267	43.2319	6.57504	9.06719	15.6422	4.24864	1.37059
	ccac98fdc666668233e0f74a9fbef00adc37e4fc42f82551ee9811febd9eee26	6	13.5853	4.89832	1.58018	4.38257	3.16389	3.48156	35.1273	1de2c25a-65d9-40c1-a2d7-36e889004001	0.327211	0.340663	0.667874	5.51599	1.77944	9.47865	3.85477	3.51345	7.36821	5.22024	1.68403
	ccac98fdc666668233e0f74a9fbef00adc37e4fc42f82551ee9811febd9eee26	7	1.02166	4.00325	1.29143	0.329583	2.82517	4.69254	51.9273	a4ff5632-adbc-441f-9a53-de4718b2bd6c	0.848611	0.535176	1.38379	4.73849	1.52862	51.7858	4.86469	19.6995	24.5642	3.83552	1.23732
	ccac98fdc666668233e0f74a9fbef00adc37e4fc42f82551ee9811febd9eee26	8	0.92515	4.90946	1.58377	0.29845	2.86683	5.14665	42.7636	5d9eb3b5-dfdb-43b3-a104-b706cb6e1ba8	0.528156	1.85195	2.38011	3.89116	1.25527	56.8719	6.00862	5.82286	11.8315	4.47907	1.44493
	ccac98fdc666668233e0f74a9fbef00adc37e4fc42f82551ee9811febd9eee26	9	-0.687831	4.37753	1.41217	-0.221892	2.62842	3.63293	33.6	4aa08ce2-18dc-4c75-932f-8dcf1f9a071c	0.515988	0.493284	1.00927	4.52856	1.4609	9.70984	4.42176	3.04386	7.46562	4.5044	1.4531
	ccac98fdc666668233e0f74a9fbef00adc37e4fc42f82551ee9811febd9eee26	10	3.42768	4.0309	1.30035	1.10576	3.24784	3.93568	35.1273	70dc0c48-7556-403a-b7e7-056d70908305	0.297052	1.19398	1.49103	3.8376	1.23799	15.2583	12.9248	8.19652	21.1213	3.38112	1.09074
	ccac98fdc666668233e0f74a9fbef00adc37e4fc42f82551ee9811febd9eee26	11	6.64882	4.77298	1.53974	2.14488	3.28557	4.08705	35.1273	fac37cef-ab58-42df-9585-8caf873d0262	0.553174	0.943368	1.49654	4.32144	1.39408	33.0597	25.0631	4.53811	29.6012	3.99934	1.29017
	ccac98fdc666668233e0f74a9fbef00adc37e4fc42f82551ee9811febd9eee26	12	17.9294	6.55726	2.11535	5.78395	2.98187	5.60077	68.7273	ed82b21d-86ed-4ce7-b34e-37dff965e09e	0.429832	0.657634	1.08747	5.27863	1.70287	81.1465	8.07561	32.3291	40.4047	5.77634	1.86343
	ccac98fdc666668233e0f74a9fbef00adc37e4fc42f82551ee9811febd9eee26	13	7.4877	4.45117	1.43593	2.4155	3.29479	4.69254	36.6545	d0fadcf0-c11c-4d54-a14c-c51550ac5b18	0.361525	0.551366	0.912891	4.23647	1.36667	30.979	5.57656	26.1296	31.7062	4.21028	1.35822
	ccac98fdc666668233e0f74a9fbef00adc37e4fc42f82551ee9811febd9eee26	14	5.53967	4.12168	1.32964	1.78708	2.7298	4.23842	45.8182	85e6c521-5654-4ed2-9ecc-b0aaa8e1fafb	0.567117	1.17625	1.74337	2.91202	0.939407	34.2156	12.9438	19.7699	32.7137	2.65696	0.857126
	ccac98fdc666668233e0f74a9fbef00adc37e4fc42f82551ee9811febd9eee26	15	5.51157	4.86066	1.56803	1.77801	3.15772	4.54117	35.1273	8d2e8a07-dd8e-4efd-b5ca-d1e4ee07aee3	0.678847	0.505859	1.18471	5.18213	1.67174	54.3289	20.5484	4.8006	25.349	5.48456	1.7693
	ccac98fdc666668233e0f74a9fbef00adc37e4fc42f82551ee9811febd9eee26	16	4.2666	5.72693	1.84749	1.37639	3.77681	4.69254	45.8182	294d690e-c04d-4b39-b5d0-d60fa1a7a416	0.629011	0.616689	1.2457	5.62153	1.81348	144.029	42.002	10.735	52.737	5.12372	1.65289
	ccac98fdc666668233e0f74a9fbef00adc37e4fc42f82551ee9811febd9eee26	17	2.41105	4.56853	1.47379	0.777797	2.83727	3.93568	39.7091	c1b57a2e-96a0-49c9-95ac-c844df64ff60	0.465496	1.42744	1.89293	3.6959	1.19228	13.8712	3.91821	9.14979	13.068	3.4854	1.12438
	ccac98fdc666668233e0f74a9fbef00adc37e4fc42f82551ee9811febd9eee26	18	0.321162	4.53881	1.4642	0.103606	2.8172	5.14665	41.2364	8998d47c-da8a-4e08-ae19-769fd183c3b8	0.382385	0.466535	0.84892	4.98221	1.60724	36.2963	26.4915	10.384	36.8755	4.02186	1.29744
	ccac98fdc666668233e0f74a9fbef00adc37e4fc42f82551ee9811febd9eee26	19	11.2245	5.18079	1.6713	3.62097	2.91582	3.48156	61.0909	054367ee-5869-4fbe-a63a-b71cfb82efd6	3.68795	0.653798	4.34175	2.73656	0.882803	87.3885	3.64502	5.725	9.37002	3.59816	1.16075
	ccac98fdc666668233e0f74a9fbef00adc37e4fc42f82551ee9811febd9eee26	20	1.43602	6.33537	2.04377	0.463256	3.54378	5.29803	36.6545	a4eef392-f522-4a3b-b55a-d5c374aa1ab9	1.08527	1.44819	2.53346	5.55191	1.79103	57.5655	4.06252	5.2685	9.33102	6.7544	2.17894
	ccac98fdc666668233e0f74a9fbef00adc37e4fc42f82551ee9811febd9eee26	21	7.36727	5.5683	1.79631	2.37665	3.6128	3.48156	47.3455	a23c59f9-ca33-4dba-ba70-eb2584ab6a80	1.69902	0.669022	2.36804	3.06662	0.98928	19.6509	2.39568	17.8891	20.2847	4.73615	1.52786
	ccac98fdc666668233e0f74a9fbef00adc37e4fc42f82551ee9811febd9eee26	22	0.296375	5.22637	1.68601	0.0956096	3.52067	3.93568	36.6545	a7b86cf5-9aa5-4203-b10f-8140461b595b	0.401829	0.771545	1.17337	4.54631	1.46662	12.2529	1.91731	6.24727	8.16458	5.81942	1.87732
	ccac98fdc666668233e0f74a9fbef00adc37e4fc42f82551ee9811febd9eee26	23	5.64116	5.02923	1.62241	1.81982	3.49463	3.7843	36.6545	c03c37c8-2858-4174-a261-6b1f0efd1f51	0.382121	0.770255	1.15238	4.25142	1.37149	13.1776	5.20047	5.00938	10.2098	4.6309	1.49391
	ccac98fdc666668233e0f74a9fbef00adc37e4fc42f82551ee9811febd9eee26	24	-0.247336	4.6659	1.5052	-0.0797895	3.36212	4.23842	45.8182	77ad0877-0b7b-42a3-afb4-588b03f3acb4	0.474461	1.18026	1.65472	3.84608	1.24073	28.6671	13.0412	13.9126	26.9539	3.91383	1.26259
	ccac98fdc666668233e0f74a9fbef00adc37e4fc42f82551ee9811febd9eee26	25	2.98006	4.28443	1.38214	0.961356	3.09345	3.48156	38.1818	f6170ddb-843e-4048-b5bd-607ccd39ee52	0.509575	1.6908	2.20037	4.40532	1.42114	23.581	4.00979	6.19801	10.2078	4.99529	1.61146
	02259c303a0880f5eebef2349803a390665674b1a9334f85e3a23cf13617c52a	1	25.7601	10.73	1.30618	3.13581	8.11554	5.31839	48.8727	37ccbd73-9507-4969-b724-e70221d1ed1f	2.05363	1.83598	3.88961	8.76906	1.06747	117.778	9.35427	18.2098	27.5641	9.10376	1.10821
	02259c303a0880f5eebef2349803a390665674b1a9334f85e3a23cf13617c52a	2	8.85912	8.27037	1.00676	1.07843	7.64532	4.05877	38.1818	851e3093-8764-43b8-b535-8e15009a4bf0	2.49727	1.04102	3.53828	6.10066	0.742641	72.89	14.3542	7.61323	21.9674	6.9907	0.850987
	02259c303a0880f5eebef2349803a390665674b1a9334f85e3a23cf13617c52a	3	14.9474	13.422	1.63388	1.81957	7.90978	4.75856	39.7091	70890c02-61f0-490a-982f-b3eec8f83e33	0.736598	0.606719	1.34332	14.1322	1.72033	75.2413	5.41164	6.57674	11.9884	13.9461	1.69767
	02259c303a0880f5eebef2349803a390665674b1a9334f85e3a23cf13617c52a	4	2.73574	7.5388	0.917708	0.333026	8.6312	3.6389	36.6545	5745b7e9-7ec4-4310-a141-9d692a051f17	0.33484	0.475083	0.809924	6.0844	0.740662	11.1152	3.67671	7.61818	11.2949	6.4984	0.791059
	02259c303a0880f5eebef2349803a390665674b1a9334f85e3a23cf13617c52a	5	33.6735	16.1798	1.96959	4.09912	8.55932	4.6186	38.1818	25b4ba17-907b-43ac-861b-ed93b1f9f3d0	0.593865	1.16139	1.75525	13.276	1.61611	101.319	17.8697	4.99399	22.8636	14.5491	1.77108
	02259c303a0880f5eebef2349803a390665674b1a9334f85e3a23cf13617c52a	6	11.5954	8.31412	1.01209	1.41153	7.88661	3.77886	47.3455	10929924-851d-4f37-80da-66ab2e5f7b91	0.94599	1.7102	2.65619	4.76238	0.57973	36.3381	30.7922	17.3408	48.133	5.25309	0.639466
	02259c303a0880f5eebef2349803a390665674b1a9334f85e3a23cf13617c52a	7	9.38724	12.2834	1.49527	1.14272	8.89877	4.89852	38.1818	b30ac54d-e1a1-456e-95c2-3dce9fe814dc	0.748049	0.639592	1.38764	8.86584	1.07925	66.9049	13.2646	4.24881	17.5134	10.806	1.31543
	02259c303a0880f5eebef2349803a390665674b1a9334f85e3a23cf13617c52a	8	16.0377	11.5298	1.40354	1.95228	7.78471	5.59831	53.4545	e27a26bb-db44-49ef-b0f1-0c2fd869ffb4	0.532244	1.00491	1.53716	9.41797	1.14646	140.009	18.3743	22.3762	40.7506	9.06936	1.10402
	02259c303a0880f5eebef2349803a390665674b1a9334f85e3a23cf13617c52a	9	11.8877	6.4668	0.787212	1.44711	8.39785	4.75856	41.2364	954c23d8-5f60-4a11-8a83-c6383d1057f1	0.369373	1.84661	2.21598	5.47847	0.666901	34.2006	2.9821	10.6079	13.59	6.04423	0.735772
	02259c303a0880f5eebef2349803a390665674b1a9334f85e3a23cf13617c52a	10	9.11692	12.668	1.5421	1.10981	9.42922	5.03848	54.9818	68bab767-ac4f-4c92-a1d4-7872fa30062e	2.32213	1.21493	3.53706	7.55854	0.92011	214.395	7.29406	21.8164	29.1105	9.17218	1.11654
	02259c303a0880f5eebef2349803a390665674b1a9334f85e3a23cf13617c52a	11	16.3693	7.12245	0.867025	1.99265	7.86455	3.49894	33.6	c48e915b-d69f-436b-aed0-bdf7fb7d718f	0.272136	0.933187	1.20532	5.13448	0.625027	12.3977	3.60236	3.34128	6.94364	7.32656	0.891871
	02259c303a0880f5eebef2349803a390665674b1a9334f85e3a23cf13617c52a	12	1.50306	6.42296	0.781876	0.182969	7.92239	5.87822	33.6	572950dd-91ee-4566-bafd-359e634480dd	0.427787	1.23174	1.65952	6.00627	0.731151	62.2023	20.3769	5.46061	25.8376	5.67796	0.691186
	02259c303a0880f5eebef2349803a390665674b1a9334f85e3a23cf13617c52a	13	8.59874	8.61047	1.04816	1.04674	8.43689	4.47865	42.7636	e821aa3a-1f96-46cb-9e66-f0135210a4d0	0.980387	1.13654	2.11692	7.72724	0.940647	56.4309	4.47145	11.5396	16.0111	8.0586	0.980983
	02259c303a0880f5eebef2349803a390665674b1a9334f85e3a23cf13617c52a	14	2.76778	10.0775	1.22675	0.336926	8.41545	4.75856	39.7091	39d7f4aa-4605-4c5f-9603-fa6f059a81cb	0.679781	0.687863	1.36764	10.5792	1.28781	99.6092	5.93423	5.40514	11.3394	11.0725	1.34787
	02259c303a0880f5eebef2349803a390665674b1a9334f85e3a23cf13617c52a	15	9.65184	7.14462	0.869724	1.17493	8.69147	3.91882	41.2364	80c2df35-7aea-491d-bad3-e084f2318bfe	0.925144	0.841778	1.76692	6.7906	0.826628	58.5685	35.5617	10.7118	46.2735	6.78617	0.82609
	02259c303a0880f5eebef2349803a390665674b1a9334f85e3a23cf13617c52a	16	3.32528	7.61399	0.926861	0.404791	8.72552	3.91882	45.8182	1443cca2-5f97-4bba-b728-53fdbf2e06fb	0.378411	0.569452	0.947863	6.92964	0.843554	32.063	39.962	11.0987	51.0607	5.14511	0.626321
	02259c303a0880f5eebef2349803a390665674b1a9334f85e3a23cf13617c52a	17	8.08912	7.89615	0.961208	0.984698	7.7248	4.47865	39.7091	1038a329-c937-47bc-a860-55f9cb31580b	0.420041	0.622252	1.04229	6.98213	0.849943	46.1708	15.2434	4.77559	20.019	7.02535	0.855205
	02259c303a0880f5eebef2349803a390665674b1a9334f85e3a23cf13617c52a	18	7.5865	7.17072	0.8729	0.923515	7.66036	4.33869	54.9818	8d9630fc-fbc4-4747-a935-f16b3e949640	0.490599	1.59041	2.08101	4.97881	0.606077	44.8882	12.5741	26.5766	39.1507	5.40837	0.658367
	02259c303a0880f5eebef2349803a390665674b1a9334f85e3a23cf13617c52a	19	21.0721	12.6095	1.53497	2.56513	8.32439	3.91882	39.7091	84a4abe9-9df0-4b17-a5ab-2cc4208489a4	0.498051	0.67611	1.17416	11.4745	1.3968	40.8269	3.81957	6.7564	10.576	12.7176	1.54813
	02259c303a0880f5eebef2349803a390665674b1a9334f85e3a23cf13617c52a	20	13.2983	9.36848	1.14044	1.61882	8.20912	4.6186	36.6545	383b576b-a523-4f38-a91a-855deb775e05	1.15811	0.912694	2.07081	7.49826	0.912773	44.247	12.5513	6.83391	19.3852	8.60446	1.04743
	02259c303a0880f5eebef2349803a390665674b1a9334f85e3a23cf13617c52a	21	-1.62197	12.7496	1.55202	-0.197445	8.25349	3.91882	36.6545	62980616-67a8-4f36-857f-c911ba31ec10	0.905178	0.715864	1.62104	11.3633	1.38326	52.7971	4.47145	7.30842	11.7799	11.3615	1.38305
	02259c303a0880f5eebef2349803a390665674b1a9334f85e3a23cf13617c52a	22	4.64683	6.37633	0.776199	0.565664	7.49908	6.43805	42.7636	a9f3bec4-3145-4066-bb21-0f9a7edc1abc	0.348539	2.89917	3.24771	5.10041	0.62088	92.9828	6.15793	3.67429	9.83223	4.87446	0.593374
	02259c303a0880f5eebef2349803a390665674b1a9334f85e3a23cf13617c52a	23	13.678	15.2825	1.86036	1.66504	8.96333	2.51924	227.564	0d557dc3-df33-4903-b96e-f4f7aac4a7c9	0.713235	0.665842	1.37908	13.7104	1.66898	79.9438	18.652	18.9815	37.6335	9.90186	1.20537
	02259c303a0880f5eebef2349803a390665674b1a9334f85e3a23cf13617c52a	24	12.9895	11.9276	1.45196	1.58123	7.79626	5.31839	45.8182	751f04d4-d09b-47ca-bec6-942e2b406291	0.870968	0.582834	1.4538	10.7234	1.30538	103.67	6.27444	10.3951	16.6695	10.8255	1.3178
	02259c303a0880f5eebef2349803a390665674b1a9334f85e3a23cf13617c52a	25	25.7976	10.7835	1.31268	3.14037	8.23919	4.05877	39.7091	9c3087c3-969f-4f1b-bbd9-78ce0b69dadf	0.704361	1.06897	1.77333	9.15888	1.11492	32.4905	5.03019	5.17444	10.2046	11.7349	1.42851
	02259c303a0880f5eebef2349803a390665674b1a9334f85e3a23cf13617c52a	26	15.9435	19.4635	2.36931	1.94083	8.88349	5.17843	80.9455	ca2ce1a2-a2df-4b95-b0dc-353ec0605105	0.669861	1.26087	1.93073	17.2668	2.10191	199.218	10.4878	8.50672	18.9946	16.9877	2.06794
	02259c303a0880f5eebef2349803a390665674b1a9334f85e3a23cf13617c52a	27	15.1116	6.79935	0.827694	1.83956	8.0005	3.6389	35.1273	c2e960a6-bc9e-40bf-8bd1-d3e4e4e49a98	0.336582	0.918742	1.25532	5.40817	0.658343	9.61891	2.34978	5.50089	7.85067	6.17552	0.751754
	02259c303a0880f5eebef2349803a390665674b1a9334f85e3a23cf13617c52a	28	5.34432	6.35873	0.774056	0.650571	8.06967	4.05877	50.4	0791df13-7590-4266-a78a-7ee1a468935c	0.677077	0.438967	1.11604	5.84295	0.711269	54.9347	4.02054	10.2816	14.3021	5.95578	0.725005
	02259c303a0880f5eebef2349803a390665674b1a9334f85e3a23cf13617c52a	29	12.4857	6.32257	0.769655	1.5199	8.02387	4.05877	45.8182	d2846233-334c-47bc-bee4-366e5b6ed108	0.548695	0.601531	1.15023	5.90856	0.719257	26.5054	2.91485	24.6116	27.5264	6.18185	0.752524
	02259c303a0880f5eebef2349803a390665674b1a9334f85e3a23cf13617c52a	30	27.6498	7.06994	0.860633	3.36585	9.01945	3.49894	33.6	922e9c44-6ad5-4c9f-abb5-d40996305a13	0.357819	0.874834	1.23265	4.93716	0.601006	8.55014	2.05565	3.08387	5.13951	9.2444	1.12533
	02259c303a0880f5eebef2349803a390665674b1a9334f85e3a23cf13617c52a	31	4.12125	9.48833	1.15503	0.501685	7.87439	5.31839	48.8727	86d155ba-2da8-42d0-b868-35985e5e3b9c	1.22163	2.12001	3.34164	6.94626	0.845577	149.627	35.3926	12.8649	48.2575	7.83023	0.953184
	02259c303a0880f5eebef2349803a390665674b1a9334f85e3a23cf13617c52a	32	13.8329	15.6437	1.90433	1.68389	8.16663	5.31839	53.4545	8c074512-ebd0-4bb0-8064-9170d7c3d0c6	1.33312	1.08023	2.41335	14.1277	1.71978	221.449	13.2872	15.2753	28.5626	14.1466	1.72208
	02259c303a0880f5eebef2349803a390665674b1a9334f85e3a23cf13617c52a	33	11.7269	13.7744	1.67678	1.42754	7.76127	5.87822	65.6727	4da763f6-b83f-40f6-9a88-ab2d95909532	1.65741	1.66913	3.32654	10.7095	1.30369	328.112	40.9386	36.7429	77.6815	11.1535	1.35773
	02259c303a0880f5eebef2349803a390665674b1a9334f85e3a23cf13617c52a	34	10.9324	7.08073	0.861946	1.33082	7.99625	3.49894	38.1818	83162e31-c00b-48db-8085-ff8217fdf2ff	0.954744	0.456038	1.41078	7.44682	0.906511	34.4143	7.01526	8.13243	15.1477	6.83539	0.83208
	02259c303a0880f5eebef2349803a390665674b1a9334f85e3a23cf13617c52a	35	6.40653	6.8741	0.836793	0.779875	7.98119	3.91882	35.1273	62694cf2-828e-4b64-bdf5-0656b928ebe7	0.361737	0.442856	0.804593	7.9153	0.963539	26.9329	9.40387	3.59229	12.9962	7.31355	0.890288
	02259c303a0880f5eebef2349803a390665674b1a9334f85e3a23cf13617c52a	36	6.83605	7.38657	0.899176	0.83216	8.0506	3.49894	42.7636	6e385585-7407-4545-9038-a9fb792633ba	0.584595	0.675785	1.26038	6.34779	0.772724	33.3456	2.33939	6.98938	9.32877	8.41169	1.02397
	02259c303a0880f5eebef2349803a390665674b1a9334f85e3a23cf13617c52a	37	11.1257	8.44713	1.02828	1.35434	8.06754	4.6186	33.6	126da79a-d845-49a4-9228-5a13e2d985ac	0.319106	1.61128	1.93039	5.64289	0.686916	21.1616	3.8026	3.09117	6.89377	7.02638	0.855331
	02259c303a0880f5eebef2349803a390665674b1a9334f85e3a23cf13617c52a	38	5.26718	7.47368	0.909781	0.641181	7.11128	4.19873	45.8182	cf668367-c85b-4c59-b147-e22072295fc7	0.49285	1.12847	1.62132	5.87796	0.715532	41.6819	3.68197	13.4887	17.1707	6.86076	0.835169
	02259c303a0880f5eebef2349803a390665674b1a9334f85e3a23cf13617c52a	39	4.06243	9.81921	1.1953	0.494524	8.10419	6.01818	53.4545	53155465-a5a0-484c-9e96-1a430170f3f8	0.507737	0.930841	1.43858	9.19729	1.1196	97.4716	27.6682	8.10935	35.7775	8.45451	1.02918
	02259c303a0880f5eebef2349803a390665674b1a9334f85e3a23cf13617c52a	40	1.41584	10.0818	1.22727	0.172352	6.62302	4.6186	36.6545	0aaee4df-4f1d-4a67-b291-f81ec9018ec6	1.23797	1.48392	2.72189	8.31178	1.0118	98.9679	11.9288	5.28898	17.2178	10.2539	1.24823
	02259c303a0880f5eebef2349803a390665674b1a9334f85e3a23cf13617c52a	41	14.3459	6.85482	0.834447	1.74635	8.02159	4.75856	42.7636	e2d947de-2d3d-4ceb-ae3f-3c078c2ba6ec	1.11391	0.696935	1.81085	5.7969	0.705664	48.3083	17.2145	9.87192	27.0865	6.09749	0.742255
	02259c303a0880f5eebef2349803a390665674b1a9334f85e3a23cf13617c52a	42	9.04068	10.1358	1.23385	1.10053	7.8608	4.47865	44.2909	08450366-9dd6-4150-a04c-c7e4772907d7	0.636225	0.974418	1.61064	7.74371	0.942651	82.7226	7.45384	4.76198	12.2158	9.10577	1.10846
	02259c303a0880f5eebef2349803a390665674b1a9334f85e3a23cf13617c52a	43	10.9747	10.0545	1.22395	1.33596	8.75508	4.33869	48.8727	ff6d5b19-2a61-4300-9396-c91f6cc462c6	1.80896	1.17382	2.98278	7.16502	0.872207	82.7226	3.75708	12.9543	16.7113	7.88886	0.96032
	02259c303a0880f5eebef2349803a390665674b1a9334f85e3a23cf13617c52a	44	9.25694	11.4529	1.39417	1.12686	7.02135	4.89852	35.1273	7181f7ab-fcb4-4bcd-83c4-7d96f7a4ca1b	1.29054	1.00915	2.29969	8.83088	1.07499	91.2728	5.97709	3.07312	9.05021	11.4754	1.39691
	02259c303a0880f5eebef2349803a390665674b1a9334f85e3a23cf13617c52a	45	19.4838	6.24386	0.760073	2.37178	7.00207	4.6186	35.1273	6353f0d2-3ed1-4f10-a74d-e73501164975	0.363331	1.93371	2.29704	5.3611	0.652614	21.1616	2.43128	3.891	6.32229	6.83788	0.832384
	02259c303a0880f5eebef2349803a390665674b1a9334f85e3a23cf13617c52a	46	11.1786	7.70199	0.937573	1.36078	8.10064	4.05877	35.1273	c3b9bb4d-5ee9-4b0c-8d76-ae35502eb751	0.412794	0.678024	1.09082	7.05937	0.859346	40.6132	12.8768	5.95513	18.8319	5.61105	0.683041
	02259c303a0880f5eebef2349803a390665674b1a9334f85e3a23cf13617c52a	47	3.91033	7.79046	0.948342	0.47601	8.88159	4.05877	44.2909	2ddbc0fa-0dcb-4594-9c1e-4ed99d582ac8	0.533322	0.468868	1.00219	7.3698	0.897135	43.392	8.71443	11.2177	19.9321	6.96093	0.847363
	02259c303a0880f5eebef2349803a390665674b1a9334f85e3a23cf13617c52a	48	13.0659	7.69264	0.936435	1.59053	8.60483	3.77886	33.6	84a76985-d0ab-4d3a-b754-53f3ad463ff7	0.453961	2.78855	3.24252	4.57205	0.556561	14.3215	4.18613	4.05508	8.24121	6.70142	0.815772
	02259c303a0880f5eebef2349803a390665674b1a9334f85e3a23cf13617c52a	49	7.57776	7.81803	0.951698	0.92245	8.18324	4.33869	71.7818	a58fe42c-a7b6-4bf8-8e66-95963ea1cae5	1.16081	0.633728	1.79454	4.25081	0.517456	69.2562	4.50204	62.6197	67.1217	5.28449	0.643287
	02259c303a0880f5eebef2349803a390665674b1a9334f85e3a23cf13617c52a	50	3.29419	7.28517	0.886833	0.401006	7.94656	3.21903	36.6545	940097bb-6f25-419a-81c4-9d69e03c90ea	0.430989	0.336757	0.767746	7.54563	0.918539	8.97765	2.53113	6.00058	8.53171	6.93786	0.844555
	02259c303a0880f5eebef2349803a390665674b1a9334f85e3a23cf13617c52a	51	17.713	6.91867	0.842218	2.15623	8.68655	3.91882	41.2364	6635dde5-6dc4-4767-b189-977828dce1ca	1.06602	0.999311	2.06533	5.52877	0.673024	29.2842	2.91959	5.22131	8.14091	8.81213	1.07271
	02259c303a0880f5eebef2349803a390665674b1a9334f85e3a23cf13617c52a	52	5.3095	8.65821	1.05398	0.646332	8.08149	4.6186	39.7091	c5160142-b2d3-4279-aa61-6a4557b3f067	0.81454	1.12557	1.94011	6.50222	0.791524	42.9645	3.75465	3.69487	7.44951	9.41855	1.14653
	02259c303a0880f5eebef2349803a390665674b1a9334f85e3a23cf13617c52a	53	-0.251416	8.95682	1.09032	-0.0306052	8.02829	4.6186	41.2364	b0576053-b39b-46fa-b3f4-b5fd6cf9a164	0.893516	1.02028	1.9138	7.63528	0.929452	50.0183	3.62684	8.09796	11.7248	9.72071	1.18331
	02259c303a0880f5eebef2349803a390665674b1a9334f85e3a23cf13617c52a	54	15.6552	7.84459	0.954931	1.90572	8.20418	3.49894	35.1273	a53162cd-7a6f-432e-9dbe-e93fb68a9c0c	1.29062	0.764009	2.05463	6.24158	0.759795	62.8435	24.5338	3.82195	28.3557	6.75284	0.822032
	02259c303a0880f5eebef2349803a390665674b1a9334f85e3a23cf13617c52a	55	12.7896	7.93746	0.966237	1.55689	8.34571	3.6389	45.8182	6aadd01a-a2cd-4d83-bc77-fc843164d690	0.439949	0.761845	1.20179	5.92291	0.721003	16.6728	2.0014	4.49027	6.49167	7.99599	0.973363
	02259c303a0880f5eebef2349803a390665674b1a9334f85e3a23cf13617c52a	56	12.7587	11.4246	1.39073	1.55313	8.25187	5.31839	39.7091	b22094f3-df4e-4b82-ac0c-435fcb5b7612	0.665197	0.716114	1.38131	12.4828	1.51955	131.245	12.7959	5.87878	18.6747	12.446	1.51507
	02259c303a0880f5eebef2349803a390665674b1a9334f85e3a23cf13617c52a	57	1.74259	10.0736	1.22628	0.212127	8.1476	4.75856	47.3455	13d96215-d5a5-4a1c-89af-696c21386ab7	1.062	1.37538	2.43738	8.40882	1.02362	156.468	9.04419	11.1926	20.2368	8.88146	1.08115
	02259c303a0880f5eebef2349803a390665674b1a9334f85e3a23cf13617c52a	58	6.45896	6.66681	0.811559	0.786258	8.39325	5.73827	47.3455	e21cc656-92b1-4703-bc0e-79f6c8069d45	0.357608	3.44481	3.80242	4.02436	0.489891	55.7897	3.37689	26.3895	29.7664	4.60869	0.561021
	02259c303a0880f5eebef2349803a390665674b1a9334f85e3a23cf13617c52a	59	12.3108	9.92349	1.208	1.49861	8.79848	4.05877	39.7091	990ee3a3-4b6c-42c6-b2bc-4c9ab6ba7d8b	0.497217	0.81604	1.31326	9.00908	1.09669	51.7284	7.30524	5.7463	13.0515	10.1459	1.23507
	02259c303a0880f5eebef2349803a390665674b1a9334f85e3a23cf13617c52a	60	14.5554	6.83097	0.831543	1.77185	8.68412	3.77886	38.1818	6b9e5d55-4d5f-4174-9e8c-1b9c78d6c8d0	0.870628	0.414351	1.28498	7.28111	0.886338	26.2917	18.0497	4.8881	22.9378	6.51199	0.792712
	02259c303a0880f5eebef2349803a390665674b1a9334f85e3a23cf13617c52a	61	3.54178	16.0189	1.95	0.431145	8.55706	5.03848	407.782	1723fc5c-9c41-47ae-913a-e0be1b4cabe9	1.14193	0.902857	2.04479	16.9301	2.06092	1397.95	42.7962	17.0425	59.8387	13.9056	1.69275
	02259c303a0880f5eebef2349803a390665674b1a9334f85e3a23cf13617c52a	62	6.81194	8.78511	1.06942	0.829226	8.01441	3.91882	38.1818	d238ac55-4f93-4c00-8160-a1ea2e6cffe8	1.82078	0.987486	2.80826	7.05022	0.858232	54.0797	15.7568	5.26803	21.0248	8.39125	1.02148
	02259c303a0880f5eebef2349803a390665674b1a9334f85e3a23cf13617c52a	63	18.2759	10.9439	1.33222	2.22475	8.50947	6.2981	33.6	1d30bec8-e7a9-48e7-b640-d52e06e73aae	0.627422	0.664721	1.29214	8.7911	1.07015	143.215	5.79729	3.30155	9.09884	12.2862	1.49562
	02259c303a0880f5eebef2349803a390665674b1a9334f85e3a23cf13617c52a	64	13.0811	7.04603	0.857723	1.59238	8.79191	3.77886	36.6545	68238662-9d4b-46fa-bb08-cd9453c9d292	1.125	0.928784	2.05379	5.89125	0.71715	25.6504	3.02935	7.22322	10.2526	7.50785	0.913941
	02259c303a0880f5eebef2349803a390665674b1a9334f85e3a23cf13617c52a	65	4.56768	7.86703	0.957664	0.55603	8.26641	4.75856	44.2909	46373b77-11b5-437c-9776-e52b29c008e7	1.0801	0.607223	1.68732	6.85363	0.834301	59.6372	4.33224	5.19481	9.52705	8.2107	0.999499
	02259c303a0880f5eebef2349803a390665674b1a9334f85e3a23cf13617c52a	66	14.2099	10.7046	1.30308	1.72979	8.57652	4.6186	47.3455	edb010e5-f340-4529-b139-ab51ae8267c9	1.09629	0.784869	1.88116	10.6005	1.29041	103.029	5.65635	8.00338	13.6597	11.5985	1.4119
	02259c303a0880f5eebef2349803a390665674b1a9334f85e3a23cf13617c52a	67	3.45451	6.69014	0.814399	0.420522	9.16235	3.49894	33.6	6a207670-a1b2-4c2d-9284-3dda59775ea8	0.486151	0.884262	1.37041	3.5493	0.432061	8.55014	2.55853	3.20395	5.76248	7.39192	0.899827
	02259c303a0880f5eebef2349803a390665674b1a9334f85e3a23cf13617c52a	68	9.25121	8.75748	1.06606	1.12616	9.25694	4.19873	38.1818	6ed3c389-d59f-42f2-aad4-7facb7afa9f0	0.982493	1.18014	2.16263	6.48319	0.789207	26.0779	2.79124	7.19473	9.98598	9.1885	1.11853
	02259c303a0880f5eebef2349803a390665674b1a9334f85e3a23cf13617c52a	69	15.5376	9.31586	1.13403	1.89141	9.34776	3.6389	54.9818	41cb3117-be8c-4e32-b071-1fc239304619	0.514075	0.794374	1.30845	7.45207	0.90715	52.7971	9.36025	19.9521	29.3124	7.07267	0.860965
	02259c303a0880f5eebef2349803a390665674b1a9334f85e3a23cf13617c52a	70	18.2614	7.76852	0.945672	2.22298	8.0184	4.89852	36.6545	2f024849-4882-4ec2-88bb-3b22aea1382f	0.334797	1.53239	1.86719	6.68803	0.814143	30.5668	3.34398	4.02508	7.36906	7.13278	0.868282
	02259c303a0880f5eebef2349803a390665674b1a9334f85e3a23cf13617c52a	71	11.326	6.35661	0.773799	1.37873	8.0823	4.33869	39.7091	51509b9c-f19b-4c7f-bf9d-5f013df2920a	0.405287	1.02108	1.42636	6.83676	0.832247	30.9943	7.54843	4.94991	12.4983	5.95865	0.725355
	02259c303a0880f5eebef2349803a390665674b1a9334f85e3a23cf13617c52a	72	10.0998	6.96777	0.848196	1.22946	8.23578	3.21903	62.6182	f480115a-0781-41ba-892f-abba5d067c22	3.5182	0.421661	3.93986	4.18484	0.509427	82.5089	3.13154	31.9853	35.1169	5.13932	0.625616
	02259c303a0880f5eebef2349803a390665674b1a9334f85e3a23cf13617c52a	73	17.9513	7.37909	0.898266	2.18524	8.32268	5.17843	39.7091	41991fa8-d541-4e3e-8b9f-3e1772da1f92	0.433017	1.55932	1.99234	7.31579	0.89056	58.3547	18.3788	8.39236	26.7712	7.42122	0.903394
	02259c303a0880f5eebef2349803a390665674b1a9334f85e3a23cf13617c52a	74	6.63028	7.07369	0.86109	0.807113	8.55748	4.89852	35.1273	3f662fd7-fd1f-4a15-85eb-e18f5254eda6	0.642661	0.575506	1.21817	7.1843	0.874554	51.7284	24.1075	4.29237	28.3998	7.51566	0.914891
	02259c303a0880f5eebef2349803a390665674b1a9334f85e3a23cf13617c52a	75	11.7114	7.91348	0.963318	1.42565	9.02991	3.77886	41.2364	80103088-63f8-4d15-9e7d-b638b5b19ef5	1.14142	1.47472	2.61615	4.69895	0.572009	30.5668	4.29547	4.4271	8.72257	7.02428	0.855074
	02259c303a0880f5eebef2349803a390665674b1a9334f85e3a23cf13617c52a	76	8.86322	9.42781	1.14766	1.07893	9.24913	3.35898	38.1818	51b84c6f-1eb7-4ed6-8280-6f5e6acc4705	0.336826	0.437462	0.774289	5.12935	0.624402	8.97765	2.15734	7.92165	10.079	6.36095	0.774326
	02259c303a0880f5eebef2349803a390665674b1a9334f85e3a23cf13617c52a	77	9.26253	8.02928	0.977414	1.12754	9.23564	3.6389	38.1818	cd2cc8be-9dc3-40c7-a878-ea6478b9c1b6	0.701023	0.639127	1.34015	5.5471	0.675256	15.8178	2.90823	9.31646	12.2247	7.67576	0.93438
	02259c303a0880f5eebef2349803a390665674b1a9334f85e3a23cf13617c52a	78	9.11651	7.45261	0.907215	1.10976	8.19778	3.21903	35.1273	86f38ab2-3eb4-4715-9610-4efddf6ce538	0.8712	0.4119	1.2831	5.29264	0.64428	10.6877	2.63507	3.10621	5.74128	8.47263	1.03138
	02259c303a0880f5eebef2349803a390665674b1a9334f85e3a23cf13617c52a	79	7.68481	8.14336	0.991302	0.935481	8.20311	4.75856	58.0364	89189cd8-d830-4cf3-919b-d49946b93d73	0.989319	1.1163	2.10562	7.93448	0.965874	136.161	27.7235	15.5183	43.2418	8.29206	1.0094
	3e2bf2fad3e773b39cd0cfffbb44a2d98f3d43e885d8381d4390d7fb13b173da	1	10.3634	9.72339	0.883158	0.941286	10.1576	3.9849	42.7636	49d8f27c-255c-4ec8-b441-44d29183d51f	0.347667	0.542454	0.890122	9.29145	0.843925	20.5122	2.93316	10.7637	13.6968	9.06644	0.823487
	3e2bf2fad3e773b39cd0cfffbb44a2d98f3d43e885d8381d4390d7fb13b173da	2	27.3971	7.45524	0.677145	2.48843	9.79351	4.57525	44.2909	40aaeb64-4b9d-431b-9afe-501ca005bf85	3.59816	0.98404	4.5822	5.2448	0.476376	54.098	2.85313	10.7417	13.5948	6.88979	0.625786
	3e2bf2fad3e773b39cd0cfffbb44a2d98f3d43e885d8381d4390d7fb13b173da	3	11.9929	11.6991	1.06261	1.08929	9.91585	4.42766	36.6545	f19fc683-3a6a-4a94-b53a-3fdbe7ee8ac0	0.850764	1.32235	2.17311	7.95505	0.722542	40.5735	5.27332	4.19867	9.47198	10.2933	0.934924
	3e2bf2fad3e773b39cd0cfffbb44a2d98f3d43e885d8381d4390d7fb13b173da	4	28.6383	11.7327	1.06566	2.60116	11.594	6.19873	59.5636	0afdc022-5373-406a-b397-3f40a50ce819	0.584526	1.38848	1.97301	7.74578	0.703535	125.102	9.99957	11.7688	21.7684	8.46702	0.769043
	3e2bf2fad3e773b39cd0cfffbb44a2d98f3d43e885d8381d4390d7fb13b173da	5	7.62973	6.97439	0.633471	0.692994	10.0503	3.24695	38.1818	4d0007b3-3549-4d83-94ec-fd0fabd98835	0.85657	0.307665	1.16423	5.50986	0.50045	9.46715	2.58524	9.9289	12.5141	6.16167	0.559653
	3e2bf2fad3e773b39cd0cfffbb44a2d98f3d43e885d8381d4390d7fb13b173da	6	21.9519	10.2295	0.929123	1.99385	10.7019	4.72284	42.7636	bd6afdef-32ff-4427-a457-c04bef4d3cc1	0.940285	0.921677	1.86196	8.49338	0.771438	74.8356	13.7543	4.41231	18.1666	10.271	0.932899
	3e2bf2fad3e773b39cd0cfffbb44a2d98f3d43e885d8381d4390d7fb13b173da	7	2.00143	11.7399	1.06631	0.181786	12.0279	4.57525	35.1273	cca35687-1a1e-44eb-a0a6-42260b2442ac	0.350049	1.0375	1.38755	9.96819	0.905392	29.5285	4.25757	3.46864	7.72621	12.2861	1.11593
	3e2bf2fad3e773b39cd0cfffbb44a2d98f3d43e885d8381d4390d7fb13b173da	8	8.91863	12.9391	1.17524	0.810063	10.5977	4.72284	42.7636	74cc613f-e1d2-476e-a370-e9b956541dcf	0.651065	0.766577	1.41764	13.4321	1.22001	72.3561	7.74768	9.28134	17.029	12.0863	1.09778
	3e2bf2fad3e773b39cd0cfffbb44a2d98f3d43e885d8381d4390d7fb13b173da	9	8.45735	8.45025	0.767521	0.768165	10.2326	4.42766	82.4727	a21183b7-7421-4f6c-8b73-d60bd669fb7f	0.798247	0.520207	1.31845	8.28909	0.752883	86.106	7.40868	51.5425	58.9511	5.84995	0.53134
	3e2bf2fad3e773b39cd0cfffbb44a2d98f3d43e885d8381d4390d7fb13b173da	10	12.9538	12.0443	1.09396	1.17657	11.1918	3.39454	35.1273	dc4e6b49-1adb-455d-98db-4c1078243677	0.317196	0.345065	0.662261	13.145	1.19394	12.172	3.75326	3.98979	7.74305	12.0165	1.09144
	3e2bf2fad3e773b39cd0cfffbb44a2d98f3d43e885d8381d4390d7fb13b173da	11	14.5851	7.59555	0.689889	1.32473	10.8658	3.54213	39.7091	b5734c31-0494-4c6a-b5d0-cf9e9695ccf7	0.433591	0.94954	1.38313	5.81152	0.527849	13.0737	6.06579	11.4007	17.4665	4.79429	0.435456
	3e2bf2fad3e773b39cd0cfffbb44a2d98f3d43e885d8381d4390d7fb13b173da	12	9.14337	7.07888	0.642962	0.830475	10.5464	4.13249	35.1273	429aa81f-0bcb-4617-96d3-51ccd63cfae8	0.598224	0.527702	1.12593	6.71951	0.61032	36.0653	9.58152	3.50764	13.0892	6.97189	0.633244
	3e2bf2fad3e773b39cd0cfffbb44a2d98f3d43e885d8381d4390d7fb13b173da	13	10.9992	8.77126	0.796678	0.999035	12.3115	3.54213	33.6	e3c8b4de-a1d4-4eae-93d0-00f3050e791e	0.995944	0.698974	1.69492	5.22429	0.474513	11.7212	10.7816	3.00052	13.7821	7.4251	0.674408
	3e2bf2fad3e773b39cd0cfffbb44a2d98f3d43e885d8381d4390d7fb13b173da	14	12.8778	9.01012	0.818373	1.16967	13.8385	3.9849	35.1273	01a6a6c3-2db4-4c8e-aa84-6df82953b28e	0.563075	0.580686	1.14376	8.40802	0.763685	30.4301	12.107	4.50943	16.6165	8.07986	0.733879
	1dc415b4e58253188bd3ad2fca8447414e4d5152cb1855af23d87d257f2675ac	1	11.1202	10.1144	1.08045	1.1879	11.3703	3.55709	35.1273	3c54a8b1-9d71-4485-9265-7f20493eed78	0.512028	0.523203	1.03523	8.65425	0.924476	24.2205	10.7791	3.85834	14.6375	9.23712	0.98674
	1dc415b4e58253188bd3ad2fca8447414e4d5152cb1855af23d87d257f2675ac	2	12.674	8.42705	0.900206	1.35388	10.1843	5.18742	48.8727	91b4e853-fd25-4b5b-ad69-1f1df76f3b89	0.447021	2.14973	2.59675	5.82234	0.621962	52.0629	2.95911	18.75	21.7091	5.92878	0.633332
	1dc415b4e58253188bd3ad2fca8447414e4d5152cb1855af23d87d257f2675ac	3	23.933	14.5432	1.55355	2.5566	9.12801	5.03921	35.1273	6a205ebb-f76a-4200-b00b-ef31c8b5fbac	0.482905	0.55173	1.03463	13.8689	1.48153	76.5098	8.99074	3.64109	12.6318	13.799	1.47405
	1dc415b4e58253188bd3ad2fca8447414e4d5152cb1855af23d87d257f2675ac	4	13.6583	14.7413	1.57471	1.45902	8.81599	5.63206	36.6545	ec6514cb-3c16-4a82-9c9d-79cdc51d23c8	0.651161	1.51312	2.16429	14.4429	1.54284	141.702	10.5933	4.19018	14.7835	15.8247	1.69045
	1dc415b4e58253188bd3ad2fca8447414e4d5152cb1855af23d87d257f2675ac	5	11.4726	7.79458	0.832643	1.22554	9.51055	3.7053	33.6	fbfdb2cf-c772-45b1-b85f-a35863ddf20b	0.337706	0.661445	0.99915	6.02587	0.643704	10.4126	6.47291	2.98537	9.45828	5.3489	0.571387
	1dc415b4e58253188bd3ad2fca8447414e4d5152cb1855af23d87d257f2675ac	6	20.2456	18.414	1.96705	2.1627	7.52187	5.78027	259.636	a26a20cb-0acf-4e88-9359-703aeacf9150	1.64249	0.997712	2.64021	19.7846	2.11346	641.052	84.4636	21.5533	106.017	11.808	1.26137
	1dc415b4e58253188bd3ad2fca8447414e4d5152cb1855af23d87d257f2675ac	7	16.0761	16.0451	1.71399	1.71731	9.12614	5.03921	50.4	dc4f261c-ce84-448b-8d5c-34418d131ce3	1.11881	0.6277	1.74651	14.0631	1.50226	194.67	14.0781	12.1608	26.2389	13.6704	1.46032
	1dc415b4e58253188bd3ad2fca8447414e4d5152cb1855af23d87d257f2675ac	8	15.7237	9.49507	1.0143	1.67966	9.69014	5.18742	44.2909	76e9119d-8e62-418f-9978-a508ec6d5e12	0.858232	1.29137	2.1496	9.40699	1.00489	98.4667	16.8663	11.7043	28.5706	8.28502	0.885034
	1dc415b4e58253188bd3ad2fca8447414e4d5152cb1855af23d87d257f2675ac	9	9.99468	5.26497	0.562421	1.06767	5.89129	3.55709	38.1818	f6f51b04-d952-416b-80b5-63201044cf3c	0.391225	0.400837	0.792062	6.1543	0.657423	9.95985	5.40699	22.1258	27.5328	4.78242	0.510874
	1dc415b4e58253188bd3ad2fca8447414e4d5152cb1855af23d87d257f2675ac	10	7.61248	7.09671	0.758094	0.81319	6.51099	4.00173	38.1818	09c247df-af29-4a5f-bcbb-f36c82684079	1.09964	0.876351	1.97599	5.49807	0.587323	28.295	7.63343	4.55758	12.191	5.85464	0.625412
	1dc415b4e58253188bd3ad2fca8447414e4d5152cb1855af23d87d257f2675ac	11	15.5993	15.8069	1.68855	1.66637	8.85175	6.0767	41.2364	b3423d19-1dde-44bc-b834-293c35cc5202	0.686542	1.86187	2.54841	14.5811	1.5576	155.057	6.04768	9.14803	15.1957	15.6882	1.67587
	1dc415b4e58253188bd3ad2fca8447414e4d5152cb1855af23d87d257f2675ac	12	11.2964	8.80371	0.940442	1.20672	9.62214	6.81776	38.1818	41596b4c-f0d8-4386-a7af-ffa7de7781f2	0.352004	2.68642	3.03842	5.99764	0.640688	67.9081	29.2272	9.98836	39.2155	5.02299	0.536573
	1dc415b4e58253188bd3ad2fca8447414e4d5152cb1855af23d87d257f2675ac	13	16.4169	20.1971	2.15752	1.75371	7.91056	5.48385	58.0364	08c2186f-dda3-49fc-887f-2ceee887a1f7	2.4924	1.40869	3.9011	13.9739	1.49274	571.56	29.8487	22.335	52.1837	16.8582	1.80085
	1dc415b4e58253188bd3ad2fca8447414e4d5152cb1855af23d87d257f2675ac	14	3.19242	7.50189	0.801377	0.341025	7.45015	4.00173	54.9818	ea662917-09a1-4082-95da-6c5232a4be07	0.479104	0.576727	1.05583	6.45045	0.689059	30.3323	6.3695	5.93113	12.3006	6.73765	0.719739
	1dc415b4e58253188bd3ad2fca8447414e4d5152cb1855af23d87d257f2675ac	15	1.59789	8.32132	0.888911	0.170692	10.4271	3.40888	38.1818	58f66de3-ae27-47b3-a911-90e99d8dece1	0.269014	0.404171	0.673186	8.4301	0.900531	10.1862	3.76364	6.35983	10.1235	6.39121	0.68273
	1dc415b4e58253188bd3ad2fca8447414e4d5152cb1855af23d87d257f2675ac	16	24.8103	21.9971	2.3498	2.65032	5.78046	4.44636	41.2364	bbd4fbe6-9d89-4c39-9683-5e4008d70285	0.294782	1.15996	1.45474	20.862	2.22855	39.613	6.26975	7.78634	14.0561	18.7547	2.00344
	1dc415b4e58253188bd3ad2fca8447414e4d5152cb1855af23d87d257f2675ac	17	9.21387	8.65093	0.924121	0.984257	10.6581	4.14994	68.7273	a6d6e200-98a4-4b44-a059-26c5cbf7719f	0.441392	0.635224	1.07662	8.29883	0.886509	106.163	52.9027	62.7424	115.645	6.58528	0.703462
	1dc415b4e58253188bd3ad2fca8447414e4d5152cb1855af23d87d257f2675ac	18	14.8036	9.70534	1.03676	1.58138	10.3259	3.40888	39.7091	926cb9b1-baeb-496a-a28a-daaad84e91e8	0.333925	0.321195	0.65512	9.66373	1.03231	14.0343	4.46627	9.21345	13.6797	7.16175	0.765042
	1dc415b4e58253188bd3ad2fca8447414e4d5152cb1855af23d87d257f2675ac	19	11.0966	7.3052	0.780366	1.18538	10.8168	4.29815	51.9273	92da4a72-c0b2-487a-940c-24936b6bcb0a	0.503569	1.00581	1.50938	5.81915	0.621621	38.0285	4.6079	6.20211	10.81	6.90106	0.737195
	1dc415b4e58253188bd3ad2fca8447414e4d5152cb1855af23d87d257f2675ac	20	11.9037	7.9648	0.850827	1.27159	10.9355	4.59457	54.9818	feb1d23b-2fa8-4c93-b756-9946fa7dcc49	0.659738	0.577303	1.23704	8.51525	0.909628	108.427	23.0898	14.9299	38.0197	7.03772	0.751793
	1dc415b4e58253188bd3ad2fca8447414e4d5152cb1855af23d87d257f2675ac	21	8.21614	8.96649	0.95783	0.877676	11.2066	3.7053	48.8727	152f166e-6011-4038-826e-0982e92cf881	0.36155	0.727468	1.08902	8.44387	0.902002	22.4097	2.54706	7.58012	10.1272	9.83873	1.05101
	1dc415b4e58253188bd3ad2fca8447414e4d5152cb1855af23d87d257f2675ac	22	14.6823	9.46844	1.01145	1.56842	10.6916	4.29815	35.1273	1c027923-a6e7-4fdb-b612-6fc2f311bc1c	1.09259	1.27778	2.37038	5.4854	0.585969	21.0515	2.31189	3.42168	5.73356	8.93691	0.954671
	1dc415b4e58253188bd3ad2fca8447414e4d5152cb1855af23d87d257f2675ac	23	-2.16605	8.31012	0.887715	-0.231385	11.4655	4.74279	48.8727	f69ccf1b-5b35-429b-befe-a94ddf76d699	0.389205	0.790339	1.17954	6.63724	0.709013	38.4812	2.89772	16.8474	19.7451	7.14924	0.763705
	1dc415b4e58253188bd3ad2fca8447414e4d5152cb1855af23d87d257f2675ac	24	18.9059	18.169	1.94087	2.01959	9.31008	5.48385	41.2364	7d108ad3-06ad-4fd9-8b03-93465c68fefa	0.856589	1.18522	2.0418	16.2024	1.73079	219.343	19.7179	6.54924	26.2671	15.9598	1.70488
	1dc415b4e58253188bd3ad2fca8447414e4d5152cb1855af23d87d257f2675ac	25	-3.92023	8.61448	0.920228	-0.418772	10.8184	4.14994	42.7636	8ea7c715-9534-423c-99c4-960b5f49af96	2.75591	0.719018	3.47492	5.63446	0.601892	61.1173	31.1532	7.76635	38.9195	6.08197	0.649697
	1dc415b4e58253188bd3ad2fca8447414e4d5152cb1855af23d87d257f2675ac	26	-2.70726	7.59983	0.811839	-0.289199	10.0383	3.85351	35.1273	5eb29bf3-61da-4b3b-8d1a-a8c8e297b10b	0.92052	0.524287	1.44481	4.66777	0.498627	18.1088	4.47887	4.26899	8.74786	7.24981	0.774449
	1dc415b4e58253188bd3ad2fca8447414e4d5152cb1855af23d87d257f2675ac	27	8.33796	7.59209	0.811012	0.890689	9.96775	4.00173	33.6	2761741e-3d2b-4b9c-988d-a47831d3c88a	0.281642	0.504797	0.786439	5.8566	0.625622	9.50713	2.80838	3.2044	6.01278	5.90897	0.631216
	1dc415b4e58253188bd3ad2fca8447414e4d5152cb1855af23d87d257f2675ac	28	8.99789	8.34853	0.891818	0.961184	10.5282	4.59457	39.7091	7eef3bf9-16c3-46a7-a7b0-4a313316d74d	0.28315	0.568779	0.85193	7.18286	0.767297	11.9971	8.37112	4.26674	12.6379	6.13374	0.655227
	1dc415b4e58253188bd3ad2fca8447414e4d5152cb1855af23d87d257f2675ac	29	10.7436	7.60569	0.812465	1.14767	10.8808	3.55709	38.1818	aa84ed96-4b55-49e8-866d-712cb0e65b49	0.289509	0.404454	0.693963	7.94283	0.84848	11.5444	7.36025	7.23663	14.5969	5.09679	0.544456
	1dc415b4e58253188bd3ad2fca8447414e4d5152cb1855af23d87d257f2675ac	30	4.87104	6.63576	0.708854	0.520341	9.22946	3.26067	33.6	8570e21f-a4d7-40c4-9892-b31c9c631d60	0.829564	0.363238	1.1928	5.49297	0.586777	11.0917	2.9748	2.85035	5.82515	7.41984	0.792612
	1dc415b4e58253188bd3ad2fca8447414e4d5152cb1855af23d87d257f2675ac	31	9.69618	8.84813	0.945187	1.03578	10.0787	3.55709	36.6545	0c7740f2-6a08-4b32-b4ae-fbf9b6230376	0.571867	0.66106	1.23293	6.21308	0.663703	12.2235	5.77227	5.88925	11.6615	6.04984	0.646265
	1dc415b4e58253188bd3ad2fca8447414e4d5152cb1855af23d87d257f2675ac	32	19.4508	8.73683	0.933298	2.0778	7.5653	4.59457	36.6545	0fda4a26-5f16-42b1-a9f5-e4d900c8002e	0.326598	0.500955	0.827554	8.8601	0.946466	33.7277	4.39777	3.31435	7.71212	9.14046	0.976415
	1dc415b4e58253188bd3ad2fca8447414e4d5152cb1855af23d87d257f2675ac	33	22.5408	14.1014	1.50636	2.40788	8.1464	5.92848	42.7636	8650ea6b-031e-4746-899d-5c21165e6802	0.821459	1.42337	2.24483	12.3907	1.32361	294.721	62.5008	11.6173	74.1181	11.5729	1.23626
	1dc415b4e58253188bd3ad2fca8447414e4d5152cb1855af23d87d257f2675ac	34	-2.42597	8.45243	0.902917	-0.25915	10.6468	3.40888	33.6	552cd57e-7955-450f-a553-ef2ad693b4a2	0.395192	0.368567	0.763759	7.50989	0.802232	9.50713	2.58153	3.11078	5.69231	8.51235	0.909318
	1dc415b4e58253188bd3ad2fca8447414e4d5152cb1855af23d87d257f2675ac	35	7.98614	9.94354	1.0622	0.853106	10.3189	5.33563	39.7091	ff4a678f-1642-433f-a02f-d678c56ecef5	0.522124	0.538093	1.06022	8.45945	0.903666	105.937	8.12751	15.1142	23.2417	7.41877	0.792498
	1dc415b4e58253188bd3ad2fca8447414e4d5152cb1855af23d87d257f2675ac	36	27.6947	12.7786	1.36506	2.95844	10.8158	5.03921	41.2364	7f4353e4-ca7b-46f4-bc65-087c638e8612	0.732859	0.686899	1.41976	11.1503	1.19112	195.802	9.4523	7.05275	16.505	11.0925	1.18494
	1dc415b4e58253188bd3ad2fca8447414e4d5152cb1855af23d87d257f2675ac	37	18.631	9.91522	1.05918	1.99022	7.11622	5.03921	108.436	7a44fa8b-78ba-43cf-8afd-3c6a48422fc8	1.16883	0.5578	1.72663	8.78702	0.938659	777.547	64.9868	74.8903	139.877	6.96805	0.744351
	1dc415b4e58253188bd3ad2fca8447414e4d5152cb1855af23d87d257f2675ac	38	15.3932	11.3181	1.20903	1.64435	12.2703	5.03921	42.7636	9725150c-bbbd-481b-8264-727e62a15ea4	0.362262	0.739903	1.10216	7.68615	0.82106	60.6645	18.9892	6.74379	25.733	8.00938	0.855589
	1dc415b4e58253188bd3ad2fca8447414e4d5152cb1855af23d87d257f2675ac	39	31.5245	21.6948	2.31751	3.36756	10.0951	6.22491	42.7636	85679895-bb1f-466a-9bc3-28d3082cf331	0.833902	0.930442	1.76434	18.3091	1.95583	134.232	6.07448	8.9905	15.065	19.3755	2.06975
	1dc415b4e58253188bd3ad2fca8447414e4d5152cb1855af23d87d257f2675ac	40	13.2593	8.50262	0.908278	1.4164	12.5673	4.00173	36.6545	f4875d20-b7a3-4469-b5e1-8efe726edc50	0.912431	0.559452	1.47188	8.94714	0.955763	30.1059	8.63141	6.27776	14.9092	7.71522	0.824166
	1dc415b4e58253188bd3ad2fca8447414e4d5152cb1855af23d87d257f2675ac	41	10.5243	8.65795	0.924872	1.12424	11.8508	4.29815	45.8182	d168cdac-0cef-42a5-b907-04c9911fafad	1.41866	1.18047	2.59913	5.92318	0.632734	68.8135	5.61745	13.6275	19.2449	7.30497	0.780342
	1dc415b4e58253188bd3ad2fca8447414e4d5152cb1855af23d87d257f2675ac	42	25.1156	22.5896	2.4131	2.68294	9.93725	6.0767	59.5636	8903493a-6115-4bdf-8dbb-27b8353abaa8	1.67417	1.3488	3.02297	18.3471	1.9599	317.583	13.7159	10.5509	24.2668	18.9006	2.01903
	1dc415b4e58253188bd3ad2fca8447414e4d5152cb1855af23d87d257f2675ac	43	16.6946	11.5178	1.23037	1.78338	12.2795	5.48385	48.8727	8122622a-9bfa-410d-8132-05ef3dbaf258	0.638	1.25033	1.88833	11.6916	1.24894	93.9395	7.23691	6.81012	14.047	12.3901	1.32355
	1dc415b4e58253188bd3ad2fca8447414e4d5152cb1855af23d87d257f2675ac	44	11.7503	10.0728	1.07601	1.2552	12.1426	4.74279	44.2909	b77e8d20-599d-484c-9f68-041ee1c264e5	1.34239	0.909529	2.25192	7.20745	0.769924	56.3637	11.542	11.8922	23.4341	8.39886	0.897194
	1dc415b4e58253188bd3ad2fca8447414e4d5152cb1855af23d87d257f2675ac	45	25.9487	9.99032	1.0672	2.77193	12.0413	4.59457	38.1818	1d2415e8-ea2f-45c6-bbb4-af41bf4f0d13	1.8746	0.611007	2.48561	8.944	0.955428	55.4583	13.3969	7.42666	20.8235	8.5189	0.910017
	1dc415b4e58253188bd3ad2fca8447414e4d5152cb1855af23d87d257f2675ac	46	16.6349	9.88827	1.0563	1.77699	12.8234	5.92848	47.3455	65f96080-03fb-4883-aa2a-c52d5c62ba22	0.369608	1.06044	1.43005	8.09659	0.864905	48.4411	7.06441	5.90556	12.97	7.73448	0.826223
	1dc415b4e58253188bd3ad2fca8447414e4d5152cb1855af23d87d257f2675ac	47	8.64746	11.1162	1.18747	0.923751	13.5393	4.74279	35.1273	98bc37ec-7a21-4536-a016-996899b68cb4	1.04	0.538323	1.57832	8.8595	0.946402	69.719	23.1392	3.55025	26.6894	11.364	1.21394
	1dc415b4e58253188bd3ad2fca8447414e4d5152cb1855af23d87d257f2675ac	48	11.8457	13.3676	1.42797	1.2654	10.169	4.29815	45.8182	1d0859ad-c094-4633-ba2e-7079d576d151	1.67316	0.615148	2.28831	10.9104	1.16548	147.587	31.1844	14.0497	45.2341	11.2434	1.20106
	1dc415b4e58253188bd3ad2fca8447414e4d5152cb1855af23d87d257f2675ac	49	27.8003	9.89744	1.05728	2.96972	13.376	3.55709	35.1273	3da0a323-ee95-4110-b2b6-942a12c757b4	0.428998	0.484112	0.913111	9.81861	1.04886	16.5243	7.95256	3.79085	11.7434	8.94695	0.955743
	1dc415b4e58253188bd3ad2fca8447414e4d5152cb1855af23d87d257f2675ac	50	9.44206	10.3268	1.10314	1.00863	13.1213	4.14994	50.4	c3a40020-7210-4c65-a85b-6ecc90d2fad6	0.710455	1.20426	1.91471	7.85545	0.839146	49.1202	24.9519	15.8705	40.8225	7.96126	0.850448
	1dc415b4e58253188bd3ad2fca8447414e4d5152cb1855af23d87d257f2675ac	51	-8.33726	8.29452	0.886048	-0.890614	12.6573	3.26067	36.6545	74b942ef-5c35-4265-bdb3-186a6e006c2b	0.344755	0.469074	0.813829	7.45504	0.796372	9.50713	10.9711	6.4223	17.3934	7.57131	0.808792
	1dc415b4e58253188bd3ad2fca8447414e4d5152cb1855af23d87d257f2675ac	52	15.5675	11.9969	1.28155	1.66298	13.4415	6.0767	64.1455	7ab365a1-7278-41b8-ae75-fae4d3174605	0.5895	2.53144	3.12094	7.69369	0.821866	216.627	8.57187	32.4569	41.0288	7.30734	0.780595
	1dc415b4e58253188bd3ad2fca8447414e4d5152cb1855af23d87d257f2675ac	53	16.842	9.04381	0.96609	1.79912	13.3441	4.29815	39.7091	b69efbb2-3a9a-4ecb-8631-a0390847329c	0.295636	1.15243	1.44806	5.92643	0.633081	22.1833	39.8801	6.57813	46.4583	6.79188	0.725531
	1dc415b4e58253188bd3ad2fca8447414e4d5152cb1855af23d87d257f2675ac	54	7.65119	8.46731	0.904506	0.817326	14.29	3.85351	35.1273	7ca577a4-bd45-4baf-8919-49b274b71fa3	0.782018	0.398438	1.18046	8.2207	0.878163	23.0887	9.2894	3.65758	12.947	7.81961	0.835317
	1dc415b4e58253188bd3ad2fca8447414e4d5152cb1855af23d87d257f2675ac	55	17.4588	8.68918	0.928207	1.865	13.7729	3.55709	36.6545	d00a3dd0-cec5-43ee-84ce-29e37d6061ce	0.39978	0.586267	0.986047	6.34762	0.678074	11.5444	2.77325	7.89746	10.6707	7.09174	0.757564
	1dc415b4e58253188bd3ad2fca8447414e4d5152cb1855af23d87d257f2675ac	56	12.9158	10.5753	1.12969	1.37971	13.6398	3.55709	38.1818	20f5a241-c5e0-4ee6-9804-b4363a08c35e	0.259993	0.360572	0.620564	10.1269	1.08179	10.1862	2.03777	4.34158	6.37935	10.9993	1.17498
	a5ccca22adc51e87a416b80a3bc705a7e48ae8b014374bd82a27c6b829e2d641	1	5.93124	11.1896	0.986379	0.522845	11.1181	4.88281	45.8182	333b64f3-4a36-4de3-9465-171a2a7e31de	0.793959	0.541056	1.33502	9.37526	0.826439	60.0852	7.09634	5.86446	12.9608	9.72771	0.857507
	a5ccca22adc51e87a416b80a3bc705a7e48ae8b014374bd82a27c6b829e2d641	2	20.6386	8.38341	0.739006	1.81931	9.58496	4.46429	41.2364	9fda446c-269a-4d96-93f3-4cb546965c7e	2.26657	1.4974	3.76397	5.91872	0.521741	69.2472	10.5432	10.6203	21.1636	5.96982	0.526246
	a5ccca22adc51e87a416b80a3bc705a7e48ae8b014374bd82a27c6b829e2d641	3	14.3538	7.25043	0.639133	1.2653	9.40367	3.62723	36.6545	c208be6b-42a3-4747-b8f1-9ad262ab5d1b	0.880939	0.963521	1.84446	6.17615	0.544434	24.7159	11.6771	4.64059	16.3177	8.44587	0.744512
	a5ccca22adc51e87a416b80a3bc705a7e48ae8b014374bd82a27c6b829e2d641	4	22.0155	11.4902	1.01287	1.94069	9.60872	4.88281	50.4	86628ca3-6987-48fb-bf81-8efc215862b7	0.557203	0.511856	1.06906	10.8871	0.959711	70.3125	5.29616	7.5345	12.8307	11.0801	0.976725
	a5ccca22adc51e87a416b80a3bc705a7e48ae8b014374bd82a27c6b829e2d641	5	25.441	10.5962	0.934064	2.24265	9.63184	5.30134	38.1818	2fb02d0f-1fc2-4370-ab75-c8c5fd2bf70f	0.730336	1.09699	1.82733	11.6622	1.02803	75.2131	15.3306	3.82407	19.1547	12.7586	1.12468
	a5ccca22adc51e87a416b80a3bc705a7e48ae8b014374bd82a27c6b829e2d641	6	24.8874	13.9433	1.22912	2.19385	9.63275	4.88281	35.1273	caab364e-2ef2-40ef-b1f8-2a01ebf3ba07	0.576948	0.703807	1.28075	9.89767	0.87249	50.2841	4.10604	3.97016	8.0762	12.9022	1.13734
	a5ccca22adc51e87a416b80a3bc705a7e48ae8b014374bd82a27c6b829e2d641	7	20.9553	19.8901	1.75334	1.84724	9.69841	5.58036	45.8182	33e90844-1613-4d36-a443-a3a579e5d26f	1.08312	1.08962	2.17273	16.8749	1.48754	194.957	10.5761	5.6145	16.1906	18.121	1.59739
	a5ccca22adc51e87a416b80a3bc705a7e48ae8b014374bd82a27c6b829e2d641	8	6.29916	12.2674	1.08139	0.555277	9.84925	5.16183	38.1818	0632a0cc-77e3-4c18-a0c3-0ef60d54c8dc	0.481991	0.794187	1.27618	11.8745	1.04675	52.2017	4.0625	5.26486	9.32736	13.9678	1.23128
	a5ccca22adc51e87a416b80a3bc705a7e48ae8b014374bd82a27c6b829e2d641	9	8.10031	11.8019	1.04035	0.71405	10.9205	5.85938	67.2	ecff5c2a-0d56-4cd4-8a07-4f240babbdd4	1.29718	1.1729	2.47008	9.38065	0.826914	268.679	15.6254	7.74977	23.3751	9.60498	0.846689
	a5ccca22adc51e87a416b80a3bc705a7e48ae8b014374bd82a27c6b829e2d641	10	26.3497	20.5821	1.81433	2.32276	11.8001	10.7422	64.1455	a5eccc4c-ce05-46ad-bf10-7ca662dcd5f6	1.01826	2.02654	3.0448	17.7537	1.565	762.571	14.1483	25.1603	39.3086	17.1807	1.5145
	a5ccca22adc51e87a416b80a3bc705a7e48ae8b014374bd82a27c6b829e2d641	11	23.2481	15.9971	1.41016	2.04935	9.96437	6.13839	61.0909	6c3637ec-b4dd-4553-8b95-850febf1ddb6	1.07691	0.879473	1.95638	12.6715	1.117	214.134	11.5518	28.8834	40.4353	12.3613	1.08966
	a5ccca22adc51e87a416b80a3bc705a7e48ae8b014374bd82a27c6b829e2d641	12	14.4618	14.188	1.25069	1.27483	11.5926	4.88281	38.1818	e730f2b8-092d-4db2-9038-9b6c8c3e7992	1.30138	1.16142	2.4628	10.7336	0.946181	67.3295	6.34458	6.85184	13.1964	11.9345	1.05204
	a5ccca22adc51e87a416b80a3bc705a7e48ae8b014374bd82a27c6b829e2d641	13	8.40424	15.0465	1.32636	0.740842	10.013	4.7433	36.6545	4cff9c36-00e2-4f92-9f69-1d1b69bf5119	0.422508	0.54752	0.970028	14.1274	1.24534	64.1335	5.28157	5.80192	11.0835	12.8202	1.13012
	a5ccca22adc51e87a416b80a3bc705a7e48ae8b014374bd82a27c6b829e2d641	14	11.533	8.22482	0.725027	1.01664	9.68279	5.02232	48.8727	b70030a3-f7d8-441e-b348-d37e90d796f6	0.505158	1.60604	2.1112	5.50299	0.485094	59.8722	24.0688	12.2407	36.3095	5.58814	0.492601
	a5ccca22adc51e87a416b80a3bc705a7e48ae8b014374bd82a27c6b829e2d641	15	0.121828	8.10852	0.714775	0.0107393	12.1286	3.48772	35.1273	cc7c792d-0c0c-4b24-b62b-1f1c3f159320	0.709999	0.446848	1.15685	7.97593	0.703087	12.7841	7.59642	6.53406	14.1305	6.53019	0.575643
	a5ccca22adc51e87a416b80a3bc705a7e48ae8b014374bd82a27c6b829e2d641	16	13.7666	13.9454	1.2293	1.21354	11.1007	4.32478	48.8727	dd15e531-e26b-4f58-97ac-edccb79dc9e0	0.568571	1.05779	1.62637	11.5925	1.02189	48.3665	3.81221	5.72275	9.53495	13.5222	1.19199
	a5ccca22adc51e87a416b80a3bc705a7e48ae8b014374bd82a27c6b829e2d641	17	3.33617	8.1367	0.717259	0.294087	11.3469	4.18527	39.7091	7ce55dce-dd0b-4bc1-be94-b97a140ebb77	0.318105	0.576063	0.894168	6.83397	0.602421	21.0938	9.73715	7.21865	16.9558	7.19694	0.634418
	a5ccca22adc51e87a416b80a3bc705a7e48ae8b014374bd82a27c6b829e2d641	18	22.3811	10.1811	0.897479	1.97292	9.36251	4.88281	35.1273	d370354e-df24-4829-8c65-00db7b70b32c	0.434397	1.56402	1.99842	8.40275	0.740711	52.8409	5.33924	3.98898	9.32822	9.74535	0.859062
	a5ccca22adc51e87a416b80a3bc705a7e48ae8b014374bd82a27c6b829e2d641	19	6.16038	8.53467	0.75234	0.543044	10.4786	5.16183	47.3455	776957cf-b7ed-429d-ace0-8755a610cbe2	0.540498	1.84209	2.38258	6.01682	0.530389	44.9574	2.91219	13.7587	16.6709	5.8257	0.513542
	a5ccca22adc51e87a416b80a3bc705a7e48ae8b014374bd82a27c6b829e2d641	20	26.5638	15.8687	1.39884	2.34162	11.2399	5.30134	36.6545	0d1cfa28-138e-4370-875a-e623a45c63a1	1.21693	1.14008	2.35701	15.2197	1.34163	110.795	10.3924	5.01951	15.4119	17.4195	1.53555
	a5ccca22adc51e87a416b80a3bc705a7e48ae8b014374bd82a27c6b829e2d641	21	8.93292	8.42056	0.742281	0.787446	9.63141	5.44085	59.5636	9a33d8d7-9f65-4951-b29a-70e6303c6cac	0.569862	0.810995	1.38086	6.98258	0.615522	127.202	7.14992	25.0118	32.1617	6.10631	0.538278
	a5ccca22adc51e87a416b80a3bc705a7e48ae8b014374bd82a27c6b829e2d641	22	9.13153	7.20662	0.635272	0.804954	10.286	4.46429	45.8182	401d1b69-5c9d-44a1-8801-0e7cf0d38123	2.27399	0.717354	2.99134	6.11709	0.539228	40.0568	5.96142	17.6752	23.6367	6.19011	0.545665
	a5ccca22adc51e87a416b80a3bc705a7e48ae8b014374bd82a27c6b829e2d641	23	16.0558	9.11541	0.803533	1.41533	10.3738	4.18527	42.7636	22dcfe11-8f24-4a01-abc7-1b4c38346cfe	2.06544	1.43926	3.5047	5.12108	0.451429	61.1506	14.8233	7.89766	22.721	7.50966	0.661984
	a5ccca22adc51e87a416b80a3bc705a7e48ae8b014374bd82a27c6b829e2d641	24	8.3982	7.80467	0.68799	0.74031	10.7219	4.7433	38.1818	96c09e31-0452-446d-a9b0-d96b5fbbf278	1.5604	1.51459	3.07499	5.19191	0.457672	29.6165	2.96463	4.49148	7.45611	7.61636	0.67139
	a5ccca22adc51e87a416b80a3bc705a7e48ae8b014374bd82a27c6b829e2d641	25	37.3753	19.3897	1.70922	3.29467	11.6118	4.60379	39.7091	bd621fa2-f966-4b71-81dd-5875bda12957	0.642968	0.961293	1.60426	16.9881	1.49752	81.8182	5.97979	5.25976	11.2396	18.8295	1.65984
	a5ccca22adc51e87a416b80a3bc705a7e48ae8b014374bd82a27c6b829e2d641	26	12.824	8.07738	0.71203	1.13045	9.33315	4.60379	38.1818	5a1bc3eb-0eee-4d51-8779-f10a10e8f136	0.553679	0.542131	1.09581	6.30919	0.556161	46.2358	15.5112	7.18002	22.6913	6.2791	0.553509
	a5ccca22adc51e87a416b80a3bc705a7e48ae8b014374bd82a27c6b829e2d641	27	8.80919	13.8837	1.22386	0.77654	11.7866	5.71987	42.7636	f3757918-0560-4c18-8086-a3e3622d0622	0.980589	0.783337	1.76393	10.3808	0.915076	64.5597	3.04588	10.1979	13.2438	13.2563	1.16856
	a5ccca22adc51e87a416b80a3bc705a7e48ae8b014374bd82a27c6b829e2d641	28	6.09528	9.46825	0.834637	0.537305	11.2737	3.48772	41.2364	04786977-dd76-4e1b-8c1e-03f8ae7e88e9	0.412647	0.317058	0.729705	10.4201	0.918545	30.2557	4.96158	7.50553	12.4671	8.08563	0.712757
	a5ccca22adc51e87a416b80a3bc705a7e48ae8b014374bd82a27c6b829e2d641	29	11.2068	9.91279	0.873823	0.987892	11.6876	4.32478	47.3455	5f01bd6e-cbf9-4b8a-b00c-8bb739f2a77a	0.695449	0.43271	1.12816	9.25912	0.816201	38.3523	3.7512	6.99092	10.7421	10.0113	0.882505
	a5ccca22adc51e87a416b80a3bc705a7e48ae8b014374bd82a27c6b829e2d641	30	8.32944	9.1178	0.803743	0.734249	9.58396	4.32478	36.6545	57247a1b-e6f3-41a5-89d9-eb16b23fe2e8	0.912594	0.495002	1.4076	7.46824	0.658333	21.733	2.52198	3.95506	6.47704	11.3161	0.997522
	a5ccca22adc51e87a416b80a3bc705a7e48ae8b014374bd82a27c6b829e2d641	31	12.6766	13.1935	1.16302	1.11746	11.6074	5.85938	39.7091	060b6c1d-d056-4b25-ace6-c941e2b369d2	1.01026	1.68566	2.69592	10.3148	0.909261	84.8011	5.98434	5.19176	11.1761	12.2757	1.08212
	a5ccca22adc51e87a416b80a3bc705a7e48ae8b014374bd82a27c6b829e2d641	32	7.37633	7.16921	0.631973	0.650231	9.69447	3.90625	38.1818	c04ad115-2752-4071-85e0-ee869126befa	0.627805	1.16572	1.79352	5.41782	0.477587	20.6676	2.51911	4.6477	7.16681	7.30077	0.643571
	a5ccca22adc51e87a416b80a3bc705a7e48ae8b014374bd82a27c6b829e2d641	33	14.2093	13.3392	1.17587	1.25256	11.0083	5.16183	36.6545	ef2a2b40-a86e-49d1-b585-cf724c7b1863	0.554936	1.43498	1.98992	9.63194	0.849066	42.6136	3.28577	4.57292	7.85869	13.2451	1.16757
	a5ccca22adc51e87a416b80a3bc705a7e48ae8b014374bd82a27c6b829e2d641	34	12.2697	9.10656	0.802753	1.08159	12.7629	4.46429	35.1273	6d4c4d2e-98ea-40be-8d20-5789a1bd21b2	0.673981	1.70483	2.37881	6.70316	0.590891	24.929	4.54539	4.13672	8.68212	8.05244	0.709831
	a5ccca22adc51e87a416b80a3bc705a7e48ae8b014374bd82a27c6b829e2d641	35	20.3971	8.82575	0.777999	1.79802	12.8363	3.62723	35.1273	bf8e8b2b-7ecb-45a7-ae7d-9992c39e411c	0.475502	0.493218	0.96872	8.27324	0.729295	11.9318	2.34419	3.60244	5.94663	11.979	1.05596
	a5ccca22adc51e87a416b80a3bc705a7e48ae8b014374bd82a27c6b829e2d641	36	16.5558	8.55261	0.753921	1.45941	11.1779	3.90625	38.1818	a5ec6d81-cf93-4463-ac5a-58063f369eb8	0.869483	0.638603	1.50809	5.96613	0.52592	63.4943	33.9756	7.05005	41.0257	6.21579	0.547929
	a5ccca22adc51e87a416b80a3bc705a7e48ae8b014374bd82a27c6b829e2d641	37	6.62205	7.59043	0.669105	0.583741	9.62012	3.90625	33.6	706d0655-38a4-42fa-9c8b-440418357821	0.650465	0.887943	1.53841	4.69502	0.413871	10.6534	2.78515	2.96334	5.74849	8.42026	0.742254
	a5ccca22adc51e87a416b80a3bc705a7e48ae8b014374bd82a27c6b829e2d641	38	17.2176	8.10062	0.714078	1.51775	9.60837	4.46429	56.5091	3763c4ad-b8fc-4fdb-b336-f2197d89f801	0.366193	0.656206	1.0224	6.50508	0.573429	32.8125	3.46193	9.09245	12.5544	6.47974	0.571196
	a5ccca22adc51e87a416b80a3bc705a7e48ae8b014374bd82a27c6b829e2d641	39	22.4468	16.4081	1.44639	1.97871	12.9731	4.7433	38.1818	abb9196d-7ea1-45c8-a9df-d8d1e19a1015	0.963491	0.910333	1.87382	17.3488	1.52931	57.5284	5.75806	4.84173	10.5998	19.5567	1.72394
	a5ccca22adc51e87a416b80a3bc705a7e48ae8b014374bd82a27c6b829e2d641	40	23.5889	9.6888	0.854078	2.07939	12.8269	4.46429	54.9818	30fd7bf3-f247-4292-9079-de306bdf8037	1.91977	0.680953	2.60073	9.09622	0.801842	93.5369	20.479	15.8504	36.3294	8.18849	0.721824
	a5ccca22adc51e87a416b80a3bc705a7e48ae8b014374bd82a27c6b829e2d641	41	6.2506	10.6635	0.939997	0.550997	13.0939	4.32478	44.2909	0bcd9f13-22bd-4ade-b0df-12cc64cb9b0f	0.408712	0.416431	0.825142	10.401	0.916855	32.8125	3.76162	12.6046	16.3662	9.42993	0.831258
	a5ccca22adc51e87a416b80a3bc705a7e48ae8b014374bd82a27c6b829e2d641	42	23.8528	11.4931	1.01313	2.10265	12.6684	4.04576	36.6545	2ea99452-f306-4dae-8e25-278cbf4a0828	0.596166	0.906335	1.5025	9.41845	0.830247	57.5284	6.94112	4.13677	11.0779	11.4183	1.00654
	a5ccca22adc51e87a416b80a3bc705a7e48ae8b014374bd82a27c6b829e2d641	43	13.9821	12.8351	1.13143	1.23254	10.8619	5.02232	36.6545	e53c7331-4ed6-4262-920f-5aab841d5ab6	0.746488	1.25073	1.99722	10.7976	0.951824	52.2017	3.72631	4.5401	8.26641	12.6672	1.11663
	a5ccca22adc51e87a416b80a3bc705a7e48ae8b014374bd82a27c6b829e2d641	44	18.6836	8.36457	0.737345	1.64698	10.3884	4.04576	44.2909	533d83dc-2c91-4640-975d-99704e616bf7	0.668743	0.423871	1.09261	8.05107	0.70971	51.9886	4.84488	5.86373	10.7086	8.40739	0.74112
	a5ccca22adc51e87a416b80a3bc705a7e48ae8b014374bd82a27c6b829e2d641	45	16.5883	8.64144	0.761752	1.46228	11.455	3.62723	32.0727	b5f62d12-7923-4f0b-a035-564b17e9dec0	0.442064	0.967919	1.40998	6.59025	0.580937	8.7358	2.70897	3.22165	5.93061	10.8075	0.952689
	a5ccca22adc51e87a416b80a3bc705a7e48ae8b014374bd82a27c6b829e2d641	46	12.5772	8.65789	0.763202	1.1087	11.4171	5.16183	45.8182	2b34d89e-b88e-4b2e-a578-7d8bb491c4ac	0.520261	0.707231	1.22749	8.11175	0.715059	33.2386	6.5994	6.00897	12.6084	8.37045	0.737864
	a5ccca22adc51e87a416b80a3bc705a7e48ae8b014374bd82a27c6b829e2d641	47	24.0493	12.1451	1.0706	2.11997	13.1023	3.90625	35.1273	2d0152eb-2ee1-4f85-a088-023baab36aa6	0.319514	0.812246	1.13176	7.5507	0.665602	10.2273	2.11109	3.78533	5.89642	11.3069	0.996715
	a5ccca22adc51e87a416b80a3bc705a7e48ae8b014374bd82a27c6b829e2d641	48	9.43265	6.99674	0.61677	0.831498	10.3825	3.76674	42.7636	397773c4-8609-4ab5-b867-5ab63357a8e2	3.32498	0.911368	4.23634	3.95021	0.348215	37.2869	2.38449	7.38494	9.76943	7.00264	0.61729
	a5ccca22adc51e87a416b80a3bc705a7e48ae8b014374bd82a27c6b829e2d641	49	11.8214	8.39701	0.740205	1.04207	10.069	4.18527	35.1273	99470ee8-f139-4516-8fee-d9f3512f0a7e	0.775389	1.2299	2.00529	5.90046	0.520132	42.6136	14.0468	3.73323	17.78	8.17847	0.720941
	a5ccca22adc51e87a416b80a3bc705a7e48ae8b014374bd82a27c6b829e2d641	50	12.8602	11.5009	1.01381	1.13364	10.5371	4.88281	39.7091	7a62ebbb-1ed9-4cef-ad57-ca901d4e9aea	0.536035	1.76871	2.30474	9.84116	0.867509	58.5938	4.1632	5.61598	9.77917	11.5012	1.01384
	a5ccca22adc51e87a416b80a3bc705a7e48ae8b014374bd82a27c6b829e2d641	51	8.23528	9.11167	0.803203	0.725949	12.6739	3.76674	33.6	45d5aef0-6299-45e6-a29a-b22080167320	0.396424	0.791693	1.18812	7.47977	0.659349	18.5369	4.20152	3.26194	7.46346	9.63151	0.849028
	a5ccca22adc51e87a416b80a3bc705a7e48ae8b014374bd82a27c6b829e2d641	52	15.7172	8.57139	0.755577	1.38549	10.8109	4.04576	36.6545	3c3291d1-eabf-4a45-bd49-64f8a42dcf1b	0.34548	0.590824	0.936304	6.63133	0.584559	12.7841	2.63964	4.04133	6.68097	8.34699	0.735796
	a5ccca22adc51e87a416b80a3bc705a7e48ae8b014374bd82a27c6b829e2d641	53	25.8177	8.80402	0.776084	2.27586	12.7356	3.76674	36.6545	bf8be69b-5e3d-421b-8475-8e93e84da88b	0.422743	0.714228	1.13697	7.81203	0.688638	15.554	3.73908	6.45131	10.1904	8.49985	0.749271
	a5ccca22adc51e87a416b80a3bc705a7e48ae8b014374bd82a27c6b829e2d641	54	14.3328	8.26994	0.729004	1.26345	10.3503	4.18527	42.7636	edc7d310-d31f-43c0-a9a7-7825a24cdd9d	0.304531	0.690054	0.994585	6.29338	0.554768	16.4063	2.59211	7.79156	10.3837	6.82344	0.601493
	a5ccca22adc51e87a416b80a3bc705a7e48ae8b014374bd82a27c6b829e2d641	55	12.6361	8.0447	0.709149	1.11388	10.7566	4.18527	35.1273	b33f5674-b9a2-4a54-9736-cea862c459ea	1.37505	1.13961	2.51466	5.96961	0.526227	40.696	12.4489	3.55445	16.0034	7.50879	0.661908
	a5ccca22adc51e87a416b80a3bc705a7e48ae8b014374bd82a27c6b829e2d641	56	14.4003	13.0557	1.15087	1.2694	12.0787	3.62723	41.2364	df8e96c2-1f06-48af-ad39-9e2d96cdb976	0.975867	0.646367	1.62223	8.81021	0.776629	33.8778	3.28395	4.45063	7.73458	13.0603	1.15128
	e41d1ab51a2d2b5f46e5d0ea386a12c6a893e058ccada55bf13d91d125867b4b	1	12.689	6.91153	0.980676	1.80044	6.62433	3.62671	36.6545	c8653b65-6d49-4e09-9dde-acdca92b94f5	0.382574	0.722286	1.10486	5.22439	0.741289	9.58668	3.54608	5.39441	8.94049	5.35379	0.759649
	e41d1ab51a2d2b5f46e5d0ea386a12c6a893e058ccada55bf13d91d125867b4b	2	18.4466	19.2719	2.73449	2.61739	6.645	7.11392	39.7091	2aec8a9b-d1f6-43ff-a68b-1647e14d4076	1.64923	0.801729	2.45096	15.5521	2.20669	2301.65	339.054	8.99044	348.044	12.5795	1.78491
	e41d1ab51a2d2b5f46e5d0ea386a12c6a893e058ccada55bf13d91d125867b4b	3	7.3608	6.16968	0.875416	1.04442	6.07282	4.18466	35.1273	59acccd4-0bef-4107-bf51-753152881e21	0.275158	1.04062	1.31578	5.76311	0.817727	14.0605	2.8768	3.87088	6.74768	5.67104	0.804664
	e41d1ab51a2d2b5f46e5d0ea386a12c6a893e058ccada55bf13d91d125867b4b	4	15.4645	19.5355	2.77189	2.19426	6.7954	5.71904	38.1818	e3c9c0f4-0eb1-47f5-97e0-52bf46e6ebca	0.536015	1.2329	1.76891	16.9631	2.40689	123.988	4.58163	5.12892	9.71055	19.4671	2.76218
	e41d1ab51a2d2b5f46e5d0ea386a12c6a893e058ccada55bf13d91d125867b4b	5	22.3303	16.2757	2.30936	3.16845	6.6067	5.30057	39.7091	fb9fc4e3-2e16-472f-93c0-77331a7b471d	0.439627	0.886618	1.32625	14.0008	1.98657	112.91	5.67259	4.53882	10.2114	15.2758	2.16748
	e41d1ab51a2d2b5f46e5d0ea386a12c6a893e058ccada55bf13d91d125867b4b	6	12.7667	6.05664	0.859376	1.81146	6.43001	3.76619	38.1818	c66eb62c-4da1-4e6b-bfb4-63aed64818ed	0.271716	0.547065	0.818781	4.64975	0.659752	10.2258	1.97167	6.52084	8.49251	6.15808	0.87377
	e41d1ab51a2d2b5f46e5d0ea386a12c6a893e058ccada55bf13d91d125867b4b	7	11.7633	6.03991	0.857002	1.6691	6.23125	3.48722	35.1273	ad0a7e70-9ba5-4d68-84cb-1abbe1c26f8a	0.397333	0.649117	1.04645	4.87209	0.691301	10.6519	2.71565	5.50725	8.2229	5.99063	0.85001
	e41d1ab51a2d2b5f46e5d0ea386a12c6a893e058ccada55bf13d91d125867b4b	8	7.68955	8.38575	1.18985	1.09107	6.90335	4.8821	44.2909	aa47ea47-3817-4a65-aac2-3fb3bab07044	2.29202	1.25536	3.54739	7.52457	1.06766	154.026	32.604	11.2359	43.8399	7.98644	1.1332
	e41d1ab51a2d2b5f46e5d0ea386a12c6a893e058ccada55bf13d91d125867b4b	9	3.85934	6.92097	0.982017	0.547601	6.87003	5.44006	76.3636	f04236d5-28f9-4967-b767-4ffb38baff40	0.51049	0.639474	1.14996	5.77381	0.819246	165.743	46.4085	49.8814	96.2899	4.68893	0.665313
	e41d1ab51a2d2b5f46e5d0ea386a12c6a893e058ccada55bf13d91d125867b4b	10	5.07653	6.32756	0.897817	0.720309	6.39876	5.71904	38.1818	4a2ab27f-15fe-4351-99d3-50a5fe8b3143	0.518186	0.876082	1.39427	5.57305	0.79076	79.4629	16.8863	3.39393	20.2802	6.59361	0.935567
	e41d1ab51a2d2b5f46e5d0ea386a12c6a893e058ccada55bf13d91d125867b4b	11	12.9508	6.38092	0.905388	1.8376	6.67015	4.18466	35.1273	650593a4-d369-436d-9839-8fe59244969c	0.669945	0.532807	1.20275	5.34089	0.757819	43.8857	21.7331	3.91921	25.6523	5.94807	0.843971
	e41d1ab51a2d2b5f46e5d0ea386a12c6a893e058ccada55bf13d91d125867b4b	12	10.6946	10.0166	1.42126	1.51746	7.65113	6.1375	584.945	c3c114de-8c76-46e5-81d9-925450c138a8	0.799457	0.660192	1.45965	9.71512	1.37848	357.69	3555.87	139.158	3695.03	3.85957	0.547634
	e41d1ab51a2d2b5f46e5d0ea386a12c6a893e058ccada55bf13d91d125867b4b	13	7.95954	6.03942	0.856934	1.12938	6.55569	5.02159	39.7091	8793b6af-735d-4e48-94ea-75f10dd10898	0.499932	2.59698	3.09691	4.4575	0.632475	28.547	3.33546	8.90945	12.2449	4.19509	0.595241
	e41d1ab51a2d2b5f46e5d0ea386a12c6a893e058ccada55bf13d91d125867b4b	14	14.8815	13.6414	1.93558	2.11153	6.91409	4.60313	42.7636	6d2bc96b-2176-4b3c-a31c-7c98d04f1328	0.975177	0.743334	1.71851	13.2708	1.88299	161.908	16.7528	7.66083	24.4136	12.8889	1.82881
	e41d1ab51a2d2b5f46e5d0ea386a12c6a893e058ccada55bf13d91d125867b4b	15	10.9018	8.30041	1.17774	1.54686	7.34354	5.16108	61.0909	c2ad19c0-afa9-4977-bd49-5936c2102088	0.627006	1.85943	2.48643	6.64597	0.942996	120.366	4.39808	21.6922	26.0903	6.99083	0.991929
	e41d1ab51a2d2b5f46e5d0ea386a12c6a893e058ccada55bf13d91d125867b4b	16	9.06528	6.45967	0.916563	1.28627	7.53919	4.46364	45.8182	6179dc5d-01b8-475a-b242-99c965571c7b	0.392773	0.686998	1.07977	5.13409	0.728475	26.6297	5.77345	23.3347	29.1082	4.00815	0.568716
	e41d1ab51a2d2b5f46e5d0ea386a12c6a893e058ccada55bf13d91d125867b4b	17	12.6864	10.0214	1.42194	1.80007	7.55677	4.04517	42.7636	c0256d35-4e6f-40ab-973d-2af60f371e86	0.752111	0.955345	1.70746	7.37022	1.04576	41.7553	4.41153	8.01871	12.4302	9.15068	1.29839
	e41d1ab51a2d2b5f46e5d0ea386a12c6a893e058ccada55bf13d91d125867b4b	18	5.90896	6.48728	0.92048	0.838422	6.72142	4.18466	39.7091	d6ff4966-595f-41f1-8cca-0128ecee7f65	0.412133	0.764489	1.17662	6.89026	0.977658	34.512	5.82132	9.28192	15.1032	6.44061	0.913858
	e41d1ab51a2d2b5f46e5d0ea386a12c6a893e058ccada55bf13d91d125867b4b	19	12.37	8.80023	1.24866	1.75518	6.6003	6.69546	41.2364	d9b4827f-a66e-466f-b852-b19e1d9267a3	0.413322	1.79123	2.20455	6.56577	0.931616	88.8365	15.5122	3.54945	19.0617	8.04585	1.14163
	e41d1ab51a2d2b5f46e5d0ea386a12c6a893e058ccada55bf13d91d125867b4b	20	3.03225	6.59175	0.935304	0.430247	6.43103	3.62671	41.2364	f82b7c61-ca8a-463f-ab75-9a8e047a81d8	0.364478	0.406486	0.770963	4.83335	0.685804	17.256	9.40072	10.8839	20.2846	4.65936	0.661116
	e41d1ab51a2d2b5f46e5d0ea386a12c6a893e058ccada55bf13d91d125867b4b	21	18.4707	8.5328	1.21072	2.62081	7.84877	4.46364	67.2	493bf771-9208-4324-bca8-e888617e1eeb	0.509494	0.867385	1.37688	6.32496	0.897448	51.342	2.68308	9.0436	11.7267	6.80476	0.965527
	e41d1ab51a2d2b5f46e5d0ea386a12c6a893e058ccada55bf13d91d125867b4b	22	9.76697	7.161	1.01607	1.38584	8.03012	4.32415	44.2909	131b53ae-c3b8-4394-8d39-2b5f5f15db90	0.440056	1.12908	1.56913	4.71657	0.669233	16.1908	2.63766	4.54178	7.17944	6.93473	0.983969
	e41d1ab51a2d2b5f46e5d0ea386a12c6a893e058ccada55bf13d91d125867b4b	23	11.1994	12.9436	1.83657	1.58908	6.587	5.99801	50.4	0f9cfd1c-2569-4a92-bb0f-9d4331681d5b	0.814417	1.08761	1.90203	12.2901	1.74385	237.323	24.1289	14.0728	38.2017	10.8844	1.54439
	e41d1ab51a2d2b5f46e5d0ea386a12c6a893e058ccada55bf13d91d125867b4b	24	16.7272	7.33446	1.04069	2.37342	7.98542	5.57955	36.6545	6bc3cf57-7067-42fc-9e71-b3304c88ea5b	0.468636	0.751072	1.21971	5.96198	0.845945	36.8554	4.41319	5.43373	9.84692	6.97351	0.989472
	e41d1ab51a2d2b5f46e5d0ea386a12c6a893e058ccada55bf13d91d125867b4b	25	17.7452	20.2971	2.87995	2.51786	6.62937	5.85852	42.7636	1c21c3e2-4ca0-4735-9030-f275673d9f1a	1.80459	0.844535	2.64912	19.883	2.82119	482.103	11.329	7.52798	18.857	20.2327	2.87082
	e41d1ab51a2d2b5f46e5d0ea386a12c6a893e058ccada55bf13d91d125867b4b	26	12.4546	8.71122	1.23604	1.76718	7.57994	4.8821	41.2364	a3980355-9c3f-424e-bc83-2fadfa7311d9	2.41831	1.2412	3.65951	4.8934	0.694325	183.212	82.9338	17.997	100.931	4.93748	0.700579
	e41d1ab51a2d2b5f46e5d0ea386a12c6a893e058ccada55bf13d91d125867b4b	27	5.9998	7.47363	1.06043	0.851312	7.88774	6.69546	67.2	5e52724d-4978-49dc-b171-70115710c165	0.511946	1.82564	2.33759	4.53339	0.643242	105.666	8.53252	28.8503	37.3828	5.94683	0.843795
	e41d1ab51a2d2b5f46e5d0ea386a12c6a893e058ccada55bf13d91d125867b4b	28	13.3624	7.39474	1.04924	1.89599	7.88797	5.71904	62.6182	2858e03b-98eb-4413-8ed4-7768ae4af153	0.50362	0.821667	1.32529	5.05296	0.716964	72.2196	2.72145	9.01282	11.7343	5.46457	0.775368
	e41d1ab51a2d2b5f46e5d0ea386a12c6a893e058ccada55bf13d91d125867b4b	29	-1.74493	6.36453	0.903064	-0.247588	8.59684	3.62671	41.2364	295b3a25-c51c-4a48-9b12-4d1892f83e88	0.395432	0.535236	0.930668	5.70737	0.809818	14.4865	5.8274	4.36654	10.1939	5.89867	0.836961
	e41d1ab51a2d2b5f46e5d0ea386a12c6a893e058ccada55bf13d91d125867b4b	30	37.583	23.53	3.33868	5.33265	7.73294	6.27699	44.2909	aa4c8c4b-3622-4b64-870d-b7ef08b42cd2	1.04868	1.4453	2.49397	20.118	2.85454	270.557	11.6536	10.2302	21.8837	20.548	2.91555
	e41d1ab51a2d2b5f46e5d0ea386a12c6a893e058ccada55bf13d91d125867b4b	31	27.6259	23.9756	3.4019	3.91984	7.97628	7.81137	91.6364	0180468b-a320-474d-9b74-4cb9f4e8f519	0.95142	1.83244	2.78386	20.883	2.96309	924.156	22.9857	9.03318	32.0189	19.1525	2.71754
	e41d1ab51a2d2b5f46e5d0ea386a12c6a893e058ccada55bf13d91d125867b4b	32	11.6408	6.415	0.910224	1.65171	7.40967	5.16108	45.8182	91e399c6-e75d-4ad9-a83a-c1cc53e63a1b	3.84061	0.715416	4.55603	6.01982	0.854153	38.9858	7.32699	5.72523	13.0522	6.2521	0.88711
	e41d1ab51a2d2b5f46e5d0ea386a12c6a893e058ccada55bf13d91d125867b4b	33	7.54431	7.23669	1.02681	1.07046	6.95061	3.62671	35.1273	762e250a-0f86-469f-9545-53552c65af5c	0.8264	0.693793	1.52019	4.24674	0.60257	91.1799	7.56211	5.58651	13.1486	5.35873	0.76035
	e41d1ab51a2d2b5f46e5d0ea386a12c6a893e058ccada55bf13d91d125867b4b	34	15.0912	6.8419	0.970797	2.14129	7.10837	3.48722	44.2909	542a59e6-5b5d-4bba-92cb-7f05b047d91b	1.49294	0.649064	2.142	4.53969	0.644136	43.0335	4.70553	8.94735	13.6529	5.64556	0.801048
	e41d1ab51a2d2b5f46e5d0ea386a12c6a893e058ccada55bf13d91d125867b4b	35	3.00667	8.20766	1.16458	0.426616	7.18441	11.0196	94.6909	69b79027-3670-43a3-b170-b268a805c472	1.74765	6.42721	8.17485	5.0153	0.711621	348.316	7.02968	12.9729	20.0025	6.09038	0.864164
	e41d1ab51a2d2b5f46e5d0ea386a12c6a893e058ccada55bf13d91d125867b4b	36	10.8139	10.945	1.55298	1.53438	6.58597	5.44006	39.7091	089b975b-30e9-4a49-a080-5857f2c76e92	1.29654	1.24693	2.54347	11.5245	1.63522	178.525	8.91886	7.2982	16.2171	11.8557	1.68221
	e41d1ab51a2d2b5f46e5d0ea386a12c6a893e058ccada55bf13d91d125867b4b	37	12.0806	5.78163	0.820355	1.71412	6.55072	4.46364	45.8182	d68b9e72-6c4f-4b78-9fd1-f99ad8757598	0.58109	0.588556	1.16965	5.96823	0.846832	47.7203	9.08124	8.62256	17.7038	5.50296	0.780815
	e41d1ab51a2d2b5f46e5d0ea386a12c6a893e058ccada55bf13d91d125867b4b	38	-2.3413	6.8689	0.974628	-0.332207	7.34448	4.46364	59.5636	721dc437-8dc6-4b4c-8fca-31721d9e2ee8	0.66765	1.16652	1.83417	5.58024	0.79178	60.9286	15.2349	31.1448	46.3797	5.39784	0.7659
	e41d1ab51a2d2b5f46e5d0ea386a12c6a893e058ccada55bf13d91d125867b4b	39	8.78715	8.68345	1.23209	1.24681	8.6681	5.44006	45.8182	222886e5-a3a5-4e55-8e3d-e60f9568d53b	2.48918	0.67985	3.16903	6.94648	0.985635	186.621	45.5404	13.1643	58.7047	7.17781	1.01846
	e41d1ab51a2d2b5f46e5d0ea386a12c6a893e058ccada55bf13d91d125867b4b	40	6.92802	5.59329	0.793631	0.983017	6.56166	3.90568	32.0727	95a72a6c-1fa1-4b41-87e7-4fb03e803a9f	1.4563	0.751996	2.20829	3.58933	0.50929	41.5423	13.8688	2.96046	16.8293	5.02502	0.713
	e41d1ab51a2d2b5f46e5d0ea386a12c6a893e058ccada55bf13d91d125867b4b	41	12.4482	8.45279	1.19937	1.76627	8.50502	8.36932	88.5818	42486d5b-088a-4544-a109-16cab4c06ec4	2.32631	1.01103	3.33733	7.12315	1.0107	356.411	44.0519	10.5322	54.5841	6.66419	0.945582
	e41d1ab51a2d2b5f46e5d0ea386a12c6a893e058ccada55bf13d91d125867b4b	42	10.817	7.50811	1.06533	1.53483	8.61068	5.30057	36.6545	12e35350-3033-4b08-897c-85efce143a04	4.13459	2.1403	6.2749	3.9316	0.557855	191.094	20.4185	4.22368	24.6422	5.67085	0.804637
	e41d1ab51a2d2b5f46e5d0ea386a12c6a893e058ccada55bf13d91d125867b4b	43	22.3168	14.6679	2.08122	3.16654	7.15181	5.99801	41.2364	09a3801a-fbec-46a0-ae29-4119e39ad198	0.712031	0.862482	1.57451	13.4126	1.90311	200.255	18.9565	4.82009	23.7766	14.588	2.06989
	e41d1ab51a2d2b5f46e5d0ea386a12c6a893e058ccada55bf13d91d125867b4b	44	8.54932	7.08485	1.00527	1.21306	7.17804	5.16108	38.1818	df0cc042-a987-497f-852a-dce88d6cc6be	0.339686	2.33667	2.67636	5.05567	0.717349	27.4818	2.78638	3.71091	6.49729	6.88379	0.976741
	e41d1ab51a2d2b5f46e5d0ea386a12c6a893e058ccada55bf13d91d125867b4b	45	5.41725	12.7198	1.80481	0.768653	7.29793	5.30057	45.8182	d3bed228-a299-45bf-8d19-d9b10df548af	0.508291	0.794988	1.30328	13.3601	1.89567	76.6934	5.7325	7.68737	13.4199	13.0004	1.84463
	e41d1ab51a2d2b5f46e5d0ea386a12c6a893e058ccada55bf13d91d125867b4b	46	20.9618	25.7522	3.65398	2.97427	8.4384	7.95085	193.964	d05b1116-7018-498f-a46d-8c93591ebccd	1.77067	1.14777	2.91844	24.0259	3.40904	2432.03	50.5636	17.9891	68.5527	19.7854	2.80735
	e41d1ab51a2d2b5f46e5d0ea386a12c6a893e058ccada55bf13d91d125867b4b	47	0.88491	7.33176	1.0403	0.12556	10.034	3.62671	39.7091	62274fe3-a8fa-4d90-a1c7-8a2a78803ef4	0.625411	1.06206	1.68747	6.26117	0.888397	17.8951	4.15076	6.81435	10.9651	7.59815	1.0781
	e41d1ab51a2d2b5f46e5d0ea386a12c6a893e058ccada55bf13d91d125867b4b	48	14.7341	11.6796	1.65721	2.09063	9.08043	7.25341	44.2909	f4384ace-af83-4ce0-b437-b67ea642da1d	1.38492	2.0932	3.47812	8.3536	1.18529	343.203	37.0545	5.67054	42.725	9.10467	1.29186
	e41d1ab51a2d2b5f46e5d0ea386a12c6a893e058ccada55bf13d91d125867b4b	49	21.1038	7.40853	1.0512	2.99442	9.60432	3.76619	44.2909	465173d4-25fc-4def-80c0-9459abaeac77	0.686005	0.581613	1.26762	5.9244	0.840612	27.9079	2.64844	5.99257	8.64101	7.92644	1.12468
	e41d1ab51a2d2b5f46e5d0ea386a12c6a893e058ccada55bf13d91d125867b4b	50	18.9222	16.4351	2.33197	2.68487	6.89249	5.85852	38.1818	0f7c9445-5399-4f99-9d20-17cf186c89f0	0.74246	1.22206	1.96452	13.6434	1.93585	157.221	9.18282	4.82949	14.0123	15.0163	2.13066
	e41d1ab51a2d2b5f46e5d0ea386a12c6a893e058ccada55bf13d91d125867b4b	51	11.6297	8.94759	1.26957	1.65013	7.26112	4.60313	45.8182	e233573e-bdb1-4812-8a04-f668427c645d	1.84486	1.36113	3.206	6.71593	0.952923	109.075	5.3461	12.8227	18.1688	8.53974	1.2117
	e41d1ab51a2d2b5f46e5d0ea386a12c6a893e058ccada55bf13d91d125867b4b	52	12.9334	7.19584	1.02102	1.83512	7.65501	5.16108	48.8727	24a4c622-da7d-4baf-be85-2612a93fb058	0.550275	0.435547	0.985822	6.16233	0.874373	38.9858	2.60638	19.187	21.7934	6.38836	0.906444
	e41d1ab51a2d2b5f46e5d0ea386a12c6a893e058ccada55bf13d91d125867b4b	53	14.5625	11.1076	1.57606	2.06628	7.59779	5.71904	38.1818	7b7d2668-475d-4b77-9e66-13777f9bc6f0	0.643414	1.57923	2.22265	8.71012	1.23588	135.492	19.9881	4.55092	24.539	9.54479	1.35431
	e41d1ab51a2d2b5f46e5d0ea386a12c6a893e058ccada55bf13d91d125867b4b	54	6.56073	6.80345	0.965342	0.930901	7.45857	3.90568	33.6	e595cf22-986d-40bf-a156-b946b502da5d	1.18984	1.10297	2.29281	5.26438	0.746963	15.1256	4.43459	3.38874	7.82332	7.03731	0.998524
	e41d1ab51a2d2b5f46e5d0ea386a12c6a893e058ccada55bf13d91d125867b4b	55	12.3533	11.4569	1.62561	1.75281	9.7477	4.46364	42.7636	f0b47b32-82dd-4a0f-a3b2-865680c32d0a	0.509363	0.677289	1.18665	10.705	1.51894	45.803	4.12217	5.71767	9.83984	11.4466	1.62415
	e41d1ab51a2d2b5f46e5d0ea386a12c6a893e058ccada55bf13d91d125867b4b	56	20.5385	19.5766	2.77772	2.9142	7.37379	6.55597	42.7636	6d20bf4f-aba0-494a-8417-cd85017fa842	0.691351	0.9912	1.68255	19.185	2.72216	320.834	21.879	5.48046	27.3594	20.1539	2.85963
	e41d1ab51a2d2b5f46e5d0ea386a12c6a893e058ccada55bf13d91d125867b4b	57	13.409	8.67295	1.2306	1.9026	9.81628	4.74261	42.7636	0bbf56cb-beff-4333-ac91-8c56a17febf5	0.645374	1.05828	1.70365	7.96253	1.1298	53.4723	22.7278	39.1545	61.8823	7.13875	1.01292
	e41d1ab51a2d2b5f46e5d0ea386a12c6a893e058ccada55bf13d91d125867b4b	58	19.0848	12.6086	1.78904	2.70794	7.08203	7.11392	42.7636	dde5ea19-0495-4b72-ae7b-517aa6300589	0.545539	1.31782	1.86336	12.3198	1.74805	163.187	13.4873	9.88285	23.3701	11.2456	1.59564
	e41d1ab51a2d2b5f46e5d0ea386a12c6a893e058ccada55bf13d91d125867b4b	59	0.389369	6.35374	0.901533	0.0552476	7.69933	4.46364	41.2364	6b541dd0-ca73-40a3-a10b-712075d913d0	0.409358	0.919415	1.32877	5.34279	0.758088	25.5645	22.0779	37.0342	59.1121	4.95604	0.703212
	e41d1ab51a2d2b5f46e5d0ea386a12c6a893e058ccada55bf13d91d125867b4b	60	16.1301	11.056	1.56873	2.2887	7.74129	4.46364	48.8727	6e8802f7-53fd-47e1-8a38-99345914f0be	2.00906	0.947635	2.9567	7.15048	1.01458	109.714	13.3163	11.6216	24.9378	8.47918	1.20311
	e41d1ab51a2d2b5f46e5d0ea386a12c6a893e058ccada55bf13d91d125867b4b	61	19.9491	17.8512	2.53291	2.83058	8.94319	6.97443	42.7636	9711240d-fee8-4eac-ac60-154fac84d28c	0.942884	1.53714	2.48002	15.4668	2.19458	917.977	88.2017	11.7914	99.9931	13.8547	1.96585
	e41d1ab51a2d2b5f46e5d0ea386a12c6a893e058ccada55bf13d91d125867b4b	62	16.4588	9.12779	1.29514	2.33534	6.79387	5.99801	36.6545	384c4a58-3c33-46a4-99c9-9b7e0dc86ccd	0.746122	1.31147	2.05759	7.1847	1.01944	66.8937	4.90443	3.39448	8.29891	10.9386	1.55208
	e41d1ab51a2d2b5f46e5d0ea386a12c6a893e058ccada55bf13d91d125867b4b	63	16.0733	14.0712	1.99657	2.28064	8.93976	5.02159	56.5091	2906c63a-365c-41ff-91e1-88e67432b01d	1.49437	0.850185	2.34455	12.3068	1.74622	171.495	10.356	25.1264	35.4824	12.0981	1.7166
	e41d1ab51a2d2b5f46e5d0ea386a12c6a893e058ccada55bf13d91d125867b4b	64	5.06702	14.3919	2.04206	0.718959	8.85401	5.85852	58.0364	02ff8315-213d-4b20-87f3-e45e27a03a2d	1.70498	0.909011	2.61399	12.481	1.77093	663.185	168.953	12.1646	181.117	11.6818	1.65753
	e41d1ab51a2d2b5f46e5d0ea386a12c6a893e058ccada55bf13d91d125867b4b	65	5.35661	7.21555	1.02381	0.760049	6.76826	3.90568	33.6	dffc73e9-83ea-40a4-a292-e3ca4b1b32aa	0.401763	1.31981	1.72158	5.087	0.721794	19.8125	3.93615	3.14994	7.08609	8.21776	1.16602
	e41d1ab51a2d2b5f46e5d0ea386a12c6a893e058ccada55bf13d91d125867b4b	66	24.4584	10.9432	1.55272	3.47041	8.0154	5.16108	42.7636	a6ab5521-e8ec-4084-85a2-92b6ef8ed7b6	0.898707	0.630889	1.5296	10.1877	1.44553	85.4279	5.22577	5.2179	10.4437	11.2852	1.60125
	e41d1ab51a2d2b5f46e5d0ea386a12c6a893e058ccada55bf13d91d125867b4b	67	-0.823661	8.81047	1.25012	-0.116869	9.38782	6.55597	79.4182	b5430a02-0166-4b59-b22e-f9d6373a03c4	0.693876	2.95286	3.64674	5.28241	0.749521	291.861	71.6954	44.8081	116.504	5.07813	0.720536
	e41d1ab51a2d2b5f46e5d0ea386a12c6a893e058ccada55bf13d91d125867b4b	68	16.8892	17.6773	2.50823	2.3964	9.02466	6.69546	42.7636	09bc0c02-c7ec-4c4f-9f91-391bf6280be5	0.648125	1.45982	2.10794	15.3901	2.1837	425.861	60.1061	8.53631	68.6424	14.1589	2.009
	e41d1ab51a2d2b5f46e5d0ea386a12c6a893e058ccada55bf13d91d125867b4b	69	10.8799	19.6315	2.78551	1.54375	9.15606	5.99801	45.8182	ed4bed2d-93e0-4da8-9a69-151e79e024c5	0.976827	1.60472	2.58155	17.6055	2.49805	322.964	8.4599	12.8842	21.3441	18.0959	2.56763
	e41d1ab51a2d2b5f46e5d0ea386a12c6a893e058ccada55bf13d91d125867b4b	70	12.2952	13.6635	1.93871	1.74457	9.40817	6.27699	100.8	a80f71ff-f977-4166-b590-f5677daada6a	2.76603	1.49947	4.2655	11.685	1.65798	642.307	30.5617	13.9749	44.5367	12.5627	1.78252
	e41d1ab51a2d2b5f46e5d0ea386a12c6a893e058ccada55bf13d91d125867b4b	71	25.9169	25.303	3.59024	3.67734	9.08434	6.27699	54.9818	79d6d891-f228-4a07-b616-aad494d32e84	2.08877	0.838057	2.92682	21.2898	3.02081	358.755	15.8008	10.0331	25.8339	21.3642	3.03136
	e41d1ab51a2d2b5f46e5d0ea386a12c6a893e058ccada55bf13d91d125867b4b	72	15.0414	18.6296	2.64336	2.13423	9.41263	5.57955	45.8182	0f0d7d86-07a7-4868-9f62-4d13ae6a7a5d	1.69097	1.08874	2.77971	15.3467	2.17754	342.138	12.2515	6.66167	18.9132	17.3876	2.46713
	e41d1ab51a2d2b5f46e5d0ea386a12c6a893e058ccada55bf13d91d125867b4b	73	10.0014	12.6006	1.7879	1.4191	9.74254	4.46364	35.1273	8a7fcfa8-c447-4d13-8ee1-9009463f3bb1	0.776864	0.757725	1.53459	10.9281	1.55058	78.3977	19.2292	5.31683	24.546	10.5143	1.49188
	e41d1ab51a2d2b5f46e5d0ea386a12c6a893e058ccada55bf13d91d125867b4b	74	11.8923	10.744	1.52446	1.6874	7.40929	5.02159	44.2909	7ea03e5d-9f29-415c-b53b-c9a7570a2c9f	0.557988	0.998013	1.556	8.68412	1.23219	79.2499	5.83689	30.2624	36.0993	8.73042	1.23876
	e41d1ab51a2d2b5f46e5d0ea386a12c6a893e058ccada55bf13d91d125867b4b	75	6.51865	7.43216	1.05455	0.924931	7.61774	4.32415	54.9818	a6c2c890-e081-4c71-a7db-5ba032c01af1	1.26044	0.658698	1.91914	6.04648	0.857935	92.4582	8.28891	8.66505	16.954	6.77336	0.961072
	e41d1ab51a2d2b5f46e5d0ea386a12c6a893e058ccada55bf13d91d125867b4b	76	21.7243	21.1852	3.00597	3.08247	9.11416	7.81137	47.3455	e274e140-f4a1-4dee-801e-2443352f23a6	0.69738	1.31705	2.01443	17.7622	2.52027	769.277	122.406	11.545	133.951	16.7577	2.37775
	e41d1ab51a2d2b5f46e5d0ea386a12c6a893e058ccada55bf13d91d125867b4b	77	8.59497	16.5808	2.35265	1.21954	10.2673	4.46364	36.6545	9e4af02c-c1ad-4dcc-bed0-31e33213d3b6	0.595257	0.892967	1.48822	14.4323	2.0478	53.2593	3.80946	4.23807	8.04753	18.542	2.63092
	e41d1ab51a2d2b5f46e5d0ea386a12c6a893e058ccada55bf13d91d125867b4b	78	9.74463	18.3923	2.60969	1.38267	8.90014	5.99801	47.3455	cc7ad482-4ab7-4f44-9d41-7b36f4570819	0.619116	1.25283	1.87194	16.1434	2.29058	492.116	109.823	13.2669	123.09	14.1642	2.00976
	e41d1ab51a2d2b5f46e5d0ea386a12c6a893e058ccada55bf13d91d125867b4b	79	14.7622	19.2542	2.73198	2.09461	9.27829	6.1375	47.3455	1ab8bda8-5295-4dbb-a16f-a65079f79ea0	1.02381	0.889437	1.91324	14.4991	2.05727	551.34	75.1946	15.9334	91.128	14.7624	2.09463
	e41d1ab51a2d2b5f46e5d0ea386a12c6a893e058ccada55bf13d91d125867b4b	80	41.8637	16.2744	2.30917	5.94004	7.06287	5.44006	44.2909	e18a25e3-ae60-4c24-b468-3e6aeb658cb6	0.712091	1.25548	1.96757	14.2875	2.02726	144.013	20.5637	10.4313	30.9951	14.8786	2.11112
	e41d1ab51a2d2b5f46e5d0ea386a12c6a893e058ccada55bf13d91d125867b4b	81	34.9969	9.29817	1.31932	4.96571	7.0947	5.44006	62.6182	a70f0b13-e49e-4525-9da5-7b5a5afc9a9b	0.506772	1.69134	2.19811	7.9728	1.13126	128.035	16.9534	28.0473	45.0007	8.14994	1.1564
	e41d1ab51a2d2b5f46e5d0ea386a12c6a893e058ccada55bf13d91d125867b4b	82	17.7112	18.8145	2.66959	2.51304	9.06576	5.85852	38.1818	629fae88-3c16-487c-9ac6-681162a78039	0.844321	1.35809	2.20241	16.5556	2.34907	782.699	95.4025	7.34645	102.749	15.9268	2.25986
	e41d1ab51a2d2b5f46e5d0ea386a12c6a893e058ccada55bf13d91d125867b4b	83	14.0314	6.917	0.981452	1.99092	7.15426	4.18466	33.6	848875da-d0eb-4411-961c-171fad8d9eef	0.333125	1.06098	1.3941	5.40847	0.767407	11.0779	2.86973	3.04395	5.91369	7.16716	1.01695
	e41d1ab51a2d2b5f46e5d0ea386a12c6a893e058ccada55bf13d91d125867b4b	84	-0.231409	8.6473	1.22696	-0.0328346	8.97343	4.60313	38.1818	d9a64359-a79e-4864-8b39-c3c0beb21389	1.51681	0.70908	2.22589	7.02988	0.99747	89.9017	23.8264	9.39105	33.2175	7.21387	1.02358
	e41d1ab51a2d2b5f46e5d0ea386a12c6a893e058ccada55bf13d91d125867b4b	85	26.0722	22.469	3.18812	3.69938	7.09144	6.83494	87.0545	14bd4bc0-5e8a-4b42-a7b1-5f16566b68f8	1.1716	1.497	2.6686	20.1612	2.86067	613.973	9.76501	46.6478	56.4128	17.8363	2.53079
	e41d1ab51a2d2b5f46e5d0ea386a12c6a893e058ccada55bf13d91d125867b4b	86	11.6957	11.0689	1.57057	1.65951	10.0719	4.46364	36.6545	3fe0da5b-3162-4148-9319-e6df5bac130f	0.732288	1.12842	1.86071	10.4661	1.48503	84.3627	21.3879	4.25591	25.6438	11.2426	1.59521
	e41d1ab51a2d2b5f46e5d0ea386a12c6a893e058ccada55bf13d91d125867b4b	87	15.8967	12.7545	1.80974	2.25558	7.40355	4.32415	45.8182	baf8a77d-a7c0-4692-9f6b-37175f2288c6	2.04609	0.900343	2.94643	10.5065	1.49077	127.609	15.4583	13.8727	29.3311	11.1649	1.58419
	e41d1ab51a2d2b5f46e5d0ea386a12c6a893e058ccada55bf13d91d125867b4b	88	9.84537	22.2275	3.15385	1.39696	8.97858	6.97443	47.3455	3575ea5b-b473-4d7d-9ac5-6df99ac2918b	1.3696	1.93345	3.30305	17.2265	2.44427	483.595	30.6652	12.7376	43.4028	17.9615	2.54856

## Sheet: spark_data
Database key:	experiment_id	spark no	amplitude	amplitude_blurred	enforce_monotonic_space	enforce_monotonic_time	f0	location_space	location_time	roi_id	slice_by_location	slice_by_time	space_half_decay	space_half_raise	space_spline_amplitude	space_spline_nodes_after	space_spline_nodes_before	spark_size	time_half_decay	time_half_raise	time_spline_amplitude	time_spline_nodes_after	time_spline_nodes_before
Parameter:			Amplitude	Amplitude blurred	Enforce monotonic increase and decay for spatial transient	Enforce monotonic increase and decay for time transient	F0	Location: space	Location: time		Number of lines used for averaging time transient taken before and after spark peak	Number of lines used for averaging spatial transient taken at before and after half-decay	Space: half decay	Space: half raise	Space: spline amplitude	Spline nodes used to fit time transient after the peak	Spline nodes used to fit time transient before the peak	Spark size	Time: half decay	Time: half raise	Time: spline amplitude	Spline nodes used to fit time transient after the peak	Spline nodes used to fit time transient before the peak
Unit:			AU	AU			AU	microm	ms				microm	microm	AU			microm x ms	ms	ms	AU
	e6e9236c2894b36ad7b180d77300cd3e1213c3c3691be48a743e096cbdd737d7	1	-1.35648	12.3677	1	1	8.26812	5.16596	41.2364	a8e8ad05-14b1-41d8-97d2-a7fe072d0508	3	3	0.531503	1.29471	12.1006	7	7	109.818	23.9763	10.4293	10.6379	10	7
	e6e9236c2894b36ad7b180d77300cd3e1213c3c3691be48a743e096cbdd737d7	2	1.24146	8.05369	1	1	8.50837	4.60748	42.7636	c83f5667-f53e-4e7f-8eb5-267e663e2655	3	3	0.629566	0.66223	6.91145	7	7	44.1404	4.0706	4.76526	8.24801	10	7
	e6e9236c2894b36ad7b180d77300cd3e1213c3c3691be48a743e096cbdd737d7	3	11.494	7.96921	1	1	7.97658	3.76976	38.1818	5dc07e49-14d1-4dfc-8b3a-7414320bf986	3	3	0.384901	1.00677	5.12839	7	7	16.4194	2.96707	3.59681	7.93354	10	7
	e6e9236c2894b36ad7b180d77300cd3e1213c3c3691be48a743e096cbdd737d7	4	16.3841	10.4656	1	1	6.82033	4.60748	38.1818	d0d89b11-4184-4db4-b882-706ee8d157dd	3	3	1.24282	0.523065	9.63633	7	7	101.288	19.376	5.02783	10.0577	10	7
	e6e9236c2894b36ad7b180d77300cd3e1213c3c3691be48a743e096cbdd737d7	5	6.93282	16.6305	1	1	8.44554	4.32824	47.3455	510d8a39-2dd2-4fc8-868f-ec1105869a27	3	3	0.829894	0.563895	15.7016	7	7	148.414	6.19352	11.9263	14.5567	10	7
	e6e9236c2894b36ad7b180d77300cd3e1213c3c3691be48a743e096cbdd737d7	6	11.8975	8.06168	1	1	8.52735	3.76976	33.6	c5c31ed3-302b-4753-bfed-c73817d2ab22	3	3	0.445861	0.507101	7.19496	7	7	44.9934	25.5019	3.26742	8.07709	10	7
	e6e9236c2894b36ad7b180d77300cd3e1213c3c3691be48a743e096cbdd737d7	7	16.0106	10.7434	1	1	8.63689	3.90938	36.6545	fe0cfe85-bed0-40dd-9e9f-8f3cded54a92	3	3	0.448638	0.562333	11.1315	7	7	34.9712	5.06639	6.77779	9.41733	10	7
	e6e9236c2894b36ad7b180d77300cd3e1213c3c3691be48a743e096cbdd737d7	8	10.1702	10.5694	1	1	8.55044	3.90938	35.1273	c4625cc2-3175-4db9-911a-b387f91aa6e0	3	3	0.843281	0.640042	9.42535	7	7	46.2728	5.1237	4.15971	10.5756	10	7
	e6e9236c2894b36ad7b180d77300cd3e1213c3c3691be48a743e096cbdd737d7	9	1.78958	8.5416	1	1	8.52447	4.46786	38.1818	3f0ec62d-7aec-4490-ad3e-ba59e5c4a054	3	3	0.651302	1.59166	8.38674	7	7	41.3683	8.66498	6.41122	8.97171	10	7
	e6e9236c2894b36ad7b180d77300cd3e1213c3c3691be48a743e096cbdd737d7	10	19.591	7.72135	1	1	7.7876	5.02634	39.7091	42e0fc01-96ff-4d77-abc3-115ba5440bd1	3	3	0.756625	1.70202	6.64795	7	7	48.6184	3.138	4.71783	9.9614	10	7
	e6e9236c2894b36ad7b180d77300cd3e1213c3c3691be48a743e096cbdd737d7	11	18.6692	11.6942	1	1	8.4257	5.02634	38.1818	e5669202-3bd4-4e88-8b6f-333d10ce846b	3	3	0.566874	1.42302	9.69482	7	7	65.2511	3.61848	6.97625	11.4672	10	7
	e6e9236c2894b36ad7b180d77300cd3e1213c3c3691be48a743e096cbdd737d7	12	11.9179	8.61857	1	1	8.55959	3.35089	50.4	7cefee68-bac0-4b5a-92a4-6de193011035	3	3	0.500019	0.41333	7.50283	7	7	37.53	3.43623	19.9568	7.52165	10	7
	e6e9236c2894b36ad7b180d77300cd3e1213c3c3691be48a743e096cbdd737d7	13	5.63265	8.457	1	1	8.57246	4.18862	35.1273	639f83b1-9287-43c4-8970-db1933a7839b	3	3	0.65764	0.493615	9.46573	7	7	49.6846	5.49469	3.27901	10.6929	10	7
	e6e9236c2894b36ad7b180d77300cd3e1213c3c3691be48a743e096cbdd737d7	14	8.79663	8.48809	1	1	8.48437	4.7471	35.1273	c1830893-b0a3-469f-8235-0e4aa963509d	3	3	0.388136	0.489987	10.8538	7	7	27.5078	11.9981	4.43746	9.27946	10	7
	e6e9236c2894b36ad7b180d77300cd3e1213c3c3691be48a743e096cbdd737d7	15	7.53466	8.86901	1	1	8.67377	3.63014	35.1273	405a2975-2ec2-4f96-8e5f-45d6ac29bacd	3	3	0.596821	0.625216	8.31691	7	7	26.0151	14.0357	3.38755	9.08658	10	7
	e6e9236c2894b36ad7b180d77300cd3e1213c3c3691be48a743e096cbdd737d7	16	9.56122	10.3837	1	1	8.6557	3.63014	45.8182	59e7c469-06cc-4fe3-9dbd-8f1baf90f294	3	3	1.13237	0.679047	7.79103	7	7	49.0449	5.22789	15.8922	8.20944	10	7
	e6e9236c2894b36ad7b180d77300cd3e1213c3c3691be48a743e096cbdd737d7	17	17.1044	12.5598	1	1	8.59821	4.88672	41.2364	b1527ceb-324b-4065-9f6f-0acaa7edbf76	3	3	0.522582	1.38973	8.06741	7	7	75.06	9.6822	4.17321	9.73607	10	7
	e6e9236c2894b36ad7b180d77300cd3e1213c3c3691be48a743e096cbdd737d7	18	-1.50824	12.9501	1	1	8.76701	3.76976	36.6545	e1587eaf-de74-48e2-a892-408be94379b4	3	3	0.429659	0.545551	12.7742	7	7	30.4931	9.53795	4.48987	13.0108	10	7
	e6e9236c2894b36ad7b180d77300cd3e1213c3c3691be48a743e096cbdd737d7	19	12.6328	8.19513	1	1	8.49174	5.72444	44.2909	4347d814-5674-4c30-af9d-2e08c138e922	3	3	1.03894	1.60156	6.27084	7	7	52.2435	7.5435	7.97082	6.59411	10	7
	e6e9236c2894b36ad7b180d77300cd3e1213c3c3691be48a743e096cbdd737d7	20	9.2167	11.5098	1	1	8.70649	3.90938	45.8182	666b03a8-2e8f-491d-aa0b-c90854cd8eaf	3	3	0.404197	0.837778	9.20916	7	7	29.0005	2.24536	4.39329	14.8225	10	7
	e6e9236c2894b36ad7b180d77300cd3e1213c3c3691be48a743e096cbdd737d7	21	2.40171	9.01952	1	1	8.62631	4.7471	35.1273	b42c89a0-de77-4e8b-a621-417f075f5fe2	3	3	0.914496	0.571721	8.8716	7	7	33.905	7.99766	4.2222	8.26971	10	7
	e6e9236c2894b36ad7b180d77300cd3e1213c3c3691be48a743e096cbdd737d7	22	15.2838	13.9053	1	1	9.17728	4.60748	41.2364	a2338a25-3221-4d17-a2bb-bbdece9b38ac	3	3	1.83162	0.883674	10.2389	7	7	92.5456	5.60771	10.4123	13.5159	10	7
	e6e9236c2894b36ad7b180d77300cd3e1213c3c3691be48a743e096cbdd737d7	23	11.7616	10.5825	1	1	8.52761	5.02634	36.6545	a75cc11b-f150-4078-8314-350caf7bf29a	3	3	0.758304	0.942014	8.08635	7	7	58.2142	4.36391	5.01882	10.1628	10	7
	e6e9236c2894b36ad7b180d77300cd3e1213c3c3691be48a743e096cbdd737d7	24	21.0113	18.3755	1	1	9.02951	6.98103	39.7091	721e4f9e-ca62-4a21-b8ff-9f2831d1620c	3	3	0.695164	0.80833	16.5253	7	7	313.674	76.1475	4.71726	16.1175	10	7
	e6e9236c2894b36ad7b180d77300cd3e1213c3c3691be48a743e096cbdd737d7	25	15.4499	10.8402	1	1	8.82052	4.049	50.4	759a38bf-5237-4aa8-81f7-9316757ac375	3	3	0.425114	1.30886	7.18229	7	7	28.1475	2.09287	7.47905	9.71344	10	7
	e6e9236c2894b36ad7b180d77300cd3e1213c3c3691be48a743e096cbdd737d7	26	31.9558	20.5661	1	1	9.32585	4.60748	41.2364	aaabf777-1534-4e95-a93d-05008b5b7b75	3	3	0.535615	0.911928	18.9851	7	7	83.5896	5.18116	5.80648	21.1029	10	7
	e6e9236c2894b36ad7b180d77300cd3e1213c3c3691be48a743e096cbdd737d7	27	8.15942	18.0122	1	1	9.18266	5.16596	42.7636	c36f60a5-339a-4a08-9594-10cbba036caf	3	3	0.652485	0.468701	17.8784	7	7	116.215	6.66938	6.91796	17.1099	10	7
	e6e9236c2894b36ad7b180d77300cd3e1213c3c3691be48a743e096cbdd737d7	28	20.1836	17.3359	1	1	9.28997	4.46786	36.6545	b9bcb205-4559-400e-896d-62292213670b	3	3	0.658037	1.11815	15.59	7	7	85.2955	5.85014	3.86308	19.279	10	7
	e6e9236c2894b36ad7b180d77300cd3e1213c3c3691be48a743e096cbdd737d7	29	4.35215	14.9999	1	1	9.10689	6.70179	42.7636	d769413b-f840-49e9-aeeb-da818372396c	3	3	0.560226	1.36671	14.3221	7	7	142.443	23.4585	4.29151	14.7501	10	7
	e6e9236c2894b36ad7b180d77300cd3e1213c3c3691be48a743e096cbdd737d7	30	16.6635	21.1306	1	1	9.28855	4.18862	51.9273	fd6b209a-310c-4caa-a541-041549f0cbd8	3	3	1.40903	0.533325	15.6032	7	7	87.4279	4.16342	5.18015	20.9443	10	7
	e6e9236c2894b36ad7b180d77300cd3e1213c3c3691be48a743e096cbdd737d7	31	32.9138	15.9925	1	1	9.33021	4.60748	42.7636	bd30a17f-a564-494d-8abe-4e528cf6b90f	3	3	0.702636	0.896398	15.5905	7	7	123.039	6.70302	5.23163	17.4108	10	7
	e6e9236c2894b36ad7b180d77300cd3e1213c3c3691be48a743e096cbdd737d7	32	-1.16851	8.61836	1	1	7.86827	4.049	42.7636	70005bbb-6e67-41fe-af46-51f765f6fcdb	3	3	0.49461	1.29694	7.26298	7	7	37.1035	7.92548	3.98962	7.57444	10	7
	e6e9236c2894b36ad7b180d77300cd3e1213c3c3691be48a743e096cbdd737d7	33	10.5061	15.9036	1	1	9.33723	5.02634	38.1818	cff0df74-c86b-4566-b34d-b1a78e0d6ed5	3	3	0.528007	1.33969	13.2328	7	7	62.6922	5.62026	3.85669	15.412	10	7
	e6e9236c2894b36ad7b180d77300cd3e1213c3c3691be48a743e096cbdd737d7	34	13.2764	14.3912	1	1	9.3381	4.88672	42.7636	49c1e048-6ff8-416d-8cf4-3eae24f4e185	3	3	0.577663	1.36987	13.726	7	7	87.2146	4.92266	11.5925	13.5265	10	7
	e6e9236c2894b36ad7b180d77300cd3e1213c3c3691be48a743e096cbdd737d7	35	31.6697	18.2313	1	1	9.33313	4.60748	38.1818	ae7032ab-5e9d-47f9-9c19-642f30fa566d	3	3	0.649007	0.5447	18.8332	7	7	136.686	10.6314	7.58368	17.5663	10	7
	e6e9236c2894b36ad7b180d77300cd3e1213c3c3691be48a743e096cbdd737d7	36	5.91884	12.6948	1	1	9.36833	4.46786	38.1818	9bc8a41d-868c-478c-ac2d-1118c9a7c7dd	3	3	0.981231	0.819176	13.4349	7	7	91.0529	21.5814	6.81573	14.9853	10	7
	e6e9236c2894b36ad7b180d77300cd3e1213c3c3691be48a743e096cbdd737d7	37	16.2274	14.7534	1	1	9.33289	5.30558	44.2909	ca45f4f8-ade8-48f5-81aa-835148650277	3	3	0.476072	1.62307	10.9306	7	7	81.0307	5.56745	6.88739	12.0173	10	7
	e6e9236c2894b36ad7b180d77300cd3e1213c3c3691be48a743e096cbdd737d7	38	21.6202	16.3508	1	1	9.44952	4.32824	41.2364	0031a1e1-cfd4-4efd-93f6-4179ec42ea78	3	3	1.08749	0.912377	12.88	7	7	62.9054	4.23426	6.41102	16.8787	10	7
	e6e9236c2894b36ad7b180d77300cd3e1213c3c3691be48a743e096cbdd737d7	39	7.78774	15.4487	1	1	9.36136	4.7471	36.6545	a00b6c4b-523a-4008-8224-1aa48ca03ee3	3	3	0.54572	0.980477	14.5847	7	7	60.773	4.954	4.34949	17.0632	10	7
	e6e9236c2894b36ad7b180d77300cd3e1213c3c3691be48a743e096cbdd737d7	40	34.0383	14.4694	1	1	9.39579	4.7471	38.1818	d490487e-b7e1-4e54-ad0c-19b51d0c578d	3	3	0.753819	1.09786	11.9338	7	7	88.7073	6.40372	8.78118	12.4719	10	7
	e6e9236c2894b36ad7b180d77300cd3e1213c3c3691be48a743e096cbdd737d7	41	27.8939	11.2869	1	1	7.67815	6.14331	47.3455	b794764e-45a3-4396-b3a5-834ff8219cbc	3	3	1.38721	2.51463	7.76384	7	7	140.098	16.2328	11.587	10.7386	10	7
	e6e9236c2894b36ad7b180d77300cd3e1213c3c3691be48a743e096cbdd737d7	42	18.388	19.7387	1	1	9.38454	5.4452	39.7091	187c4bb7-5c44-45fa-8eee-bbe6a3e3ee15	3	3	0.600144	1.51107	15.5699	7	7	85.0823	4.27283	4.23178	20.0465	10	7
	e6e9236c2894b36ad7b180d77300cd3e1213c3c3691be48a743e096cbdd737d7	43	29.5617	16.6137	1	1	9.4951	4.18862	39.7091	76f2efd3-1c13-437c-b700-2fdd835219cc	3	3	1.17574	1.11335	10.4064	7	7	66.5305	4.44169	10.4532	12.9524	10	7
	e6e9236c2894b36ad7b180d77300cd3e1213c3c3691be48a743e096cbdd737d7	44	-2.44135	11.8392	1	1	9.45424	4.46786	42.7636	170e6230-4434-445d-a8ed-c28357329070	3	3	0.877936	0.939822	10.2584	7	7	107.046	16.6214	4.58835	11.6107	10	7
	e6e9236c2894b36ad7b180d77300cd3e1213c3c3691be48a743e096cbdd737d7	45	12.3641	11.9987	1	1	8.38206	4.88672	35.1273	8f4c5cca-1018-482a-af71-3c956fa4e729	3	3	0.480591	1.19075	9.91749	7	7	100.649	16.4647	3.71199	9.46609	10	7
	e6e9236c2894b36ad7b180d77300cd3e1213c3c3691be48a743e096cbdd737d7	46	11.1666	19.599	1	1	9.36882	5.16596	39.7091	2269fbf5-9187-4365-ac10-c61bb452cd2d	3	3	0.446292	0.618932	17.2353	7	7	93.1853	6.06081	6.36231	17.4995	10	7
	e6e9236c2894b36ad7b180d77300cd3e1213c3c3691be48a743e096cbdd737d7	47	10.4076	14.1353	1	1	9.43264	4.049	41.2364	c732e360-3e38-4ac9-9b09-2fdf1c4cb016	3	3	2.01994	0.897425	10.7449	7	7	93.6118	17.7456	10.5295	10.9005	10	7
	e6e9236c2894b36ad7b180d77300cd3e1213c3c3691be48a743e096cbdd737d7	48	10.1494	15.6765	1	1	9.5092	4.46786	36.6545	1624eb09-6ab5-43c2-baf1-063523ce1bd2	3	3	0.473035	1.11921	12.2405	7	7	70.582	6.04301	3.39023	16.0515	10	7
	e6e9236c2894b36ad7b180d77300cd3e1213c3c3691be48a743e096cbdd737d7	49	7.72639	14.8054	1	1	9.37619	4.88672	42.7636	cc98ae5a-e20d-4256-9ec9-a1dcf6e8a08f	3	3	0.829056	0.989029	12.5527	7	7	98.7295	7.55644	11.4422	13.2343	10	7
	e6e9236c2894b36ad7b180d77300cd3e1213c3c3691be48a743e096cbdd737d7	50	25.7495	16.2596	1	1	9.32787	5.4452	41.2364	ac9dfcd0-32dc-4542-9f06-8d9b119ea0e6	3	3	1.02744	0.660653	16.1684	7	7	97.4501	7.67696	9.62791	16.937	10	7
	e6e9236c2894b36ad7b180d77300cd3e1213c3c3691be48a743e096cbdd737d7	51	13.213	12.6158	1	1	9.52594	4.7471	42.7636	9c8bfeb3-c610-4813-84f1-ae04c8754ee3	3	3	0.675133	1.81859	10.636	7	7	90.6265	10.9384	11.5585	10.9762	10	7
	e6e9236c2894b36ad7b180d77300cd3e1213c3c3691be48a743e096cbdd737d7	52	9.85905	8.02172	1	1	7.75924	6.28293	51.9273	da73b000-311e-4173-bdf3-c016fcb1e84d	3	3	1.75319	2.2666	5.79627	7	7	216.437	61.9594	18.1403	6.39568	10	7
	e6e9236c2894b36ad7b180d77300cd3e1213c3c3691be48a743e096cbdd737d7	53	18.5563	9.13845	1	1	8.08274	4.46786	61.0909	ec703329-f249-4713-9ccc-f031733e7299	3	3	0.584156	1.09295	7.55384	7	7	53.7362	4.16173	10.3621	8.72866	10	7
	e6e9236c2894b36ad7b180d77300cd3e1213c3c3691be48a743e096cbdd737d7	54	15.5519	10.6426	1	1	8.5806	4.18862	38.1818	c7d4bd0a-0e43-4754-b798-6c8ff119a113	3	3	0.42674	0.808123	10.3578	7	7	24.3092	3.42798	4.14588	11.7753	10	7
	e6e9236c2894b36ad7b180d77300cd3e1213c3c3691be48a743e096cbdd737d7	55	16.1501	12.9104	1	1	8.04936	4.18862	36.6545	928f9240-d9e3-473b-ab46-483eb9bc31a4	3	3	0.840649	0.986892	10.6175	7	7	60.1333	4.47208	3.57282	15.3044	10	7
	e6e9236c2894b36ad7b180d77300cd3e1213c3c3691be48a743e096cbdd737d7	56	30.4742	15.7812	1	1	9.44247	4.32824	38.1818	a00d082b-ee12-4350-bc0e-fff54e3f75c9	3	3	1.1227	0.775384	12.473	7	7	82.0969	4.65637	4.383	15.9401	10	7
	e6e9236c2894b36ad7b180d77300cd3e1213c3c3691be48a743e096cbdd737d7	57	19.6905	14.0021	1	1	9.42315	4.60748	41.2364	b4753323-604d-4360-b28f-1a2c244a7bc5	3	3	0.642666	0.922625	13.0352	7	7	91.9059	22.3205	4.48968	14.1327	10	7
	e6e9236c2894b36ad7b180d77300cd3e1213c3c3691be48a743e096cbdd737d7	58	24.4699	16.0598	1	1	9.367	5.16596	36.6545	c1483419-9a3a-4ddc-bbb4-b8586a666aba	3	3	0.729941	0.813765	13.8279	7	7	87.8544	10.0096	3.37917	16.714	10	7
	e6e9236c2894b36ad7b180d77300cd3e1213c3c3691be48a743e096cbdd737d7	59	40.9354	17.1737	1	1	9.53631	4.46786	38.1818	eedf1fc3-911c-4646-b9c5-20360de64720	3	3	0.524397	0.738098	15.5157	7	7	65.2511	4.28512	3.66176	18.9662	10	7
	e6e9236c2894b36ad7b180d77300cd3e1213c3c3691be48a743e096cbdd737d7	60	26.1014	16.9804	1	1	9.41161	5.16596	38.1818	c901e8a8-151c-4428-9489-e486f13a7302	3	3	0.556438	1.52291	11.3547	7	7	83.3763	4.83403	4.47257	13.6916	10	7
	e6e9236c2894b36ad7b180d77300cd3e1213c3c3691be48a743e096cbdd737d7	61	24.6828	18.9797	1	1	9.44082	4.60748	36.6545	26a98495-4034-4712-a2ce-53aff12afb04	3	3	0.578661	0.902174	19.4247	7	7	65.4643	8.27995	4.14729	19.4837	10	7
	e6e9236c2894b36ad7b180d77300cd3e1213c3c3691be48a743e096cbdd737d7	62	26.4674	17.8703	1	1	9.32302	5.58482	36.6545	ffd848ad-9ae9-45c9-a1b4-7e37859f3b85	3	3	0.471946	0.667276	17.9582	7	7	94.4648	7.40784	5.36356	17.4104	10	7
	e6e9236c2894b36ad7b180d77300cd3e1213c3c3691be48a743e096cbdd737d7	63	18.6364	19.5218	1	1	9.44644	4.18862	42.7636	47fa0ba6-3b20-4aff-97a2-26779f1b462a	3	3	0.926591	0.521486	15.5954	7	7	121.333	13.8648	10.0827	15.325	10	7
	e6e9236c2894b36ad7b180d77300cd3e1213c3c3691be48a743e096cbdd737d7	64	10.0353	15.4458	1	1	9.38392	4.88672	47.3455	70b6fd40-58c2-46ce-a1b5-0a82c347314d	3	3	0.506787	1.08217	14.7993	7	7	80.1778	17.9868	8.44504	12.4511	10	7
	e6e9236c2894b36ad7b180d77300cd3e1213c3c3691be48a743e096cbdd737d7	65	19.9085	16.1688	1	1	9.42149	4.60748	45.8182	fc6a9507-ed71-45b2-a0ba-187d757798a8	3	3	0.502723	0.873232	15.1815	7	7	75.913	8.51428	10.0725	14.7735	10	7
	e6e9236c2894b36ad7b180d77300cd3e1213c3c3691be48a743e096cbdd737d7	66	23.9075	15.3029	1	1	9.35216	5.02634	38.1818	41f6184e-1d60-4ce9-b569-cdd612cdb87f	3	3	0.553114	1.05328	14.4154	7	7	83.8028	20.7431	7.97338	13.9417	10	7
	e6e9236c2894b36ad7b180d77300cd3e1213c3c3691be48a743e096cbdd737d7	67	11.6335	13.7866	1	1	9.35942	5.16596	36.6545	78a3cf34-6960-4928-a7a3-3913e52f7796	3	3	0.743424	0.603133	12.1544	7	7	80.391	13.5686	3.58883	14.2199	10	7
	e6e9236c2894b36ad7b180d77300cd3e1213c3c3691be48a743e096cbdd737d7	68	22.0495	16.716	1	1	9.39831	5.02634	38.1818	7494eafc-6c9d-4dd2-9d74-143f298dcf51	3	3	0.611325	1.32626	13.3708	7	7	85.2955	4.69531	3.577	17.7273	10	7
	e6e9236c2894b36ad7b180d77300cd3e1213c3c3691be48a743e096cbdd737d7	69	16.6097	10.662	1	1	8.90045	4.88672	48.8727	59ba29aa-2955-4b64-af97-fe93c638246b	3	3	0.508756	1.89048	8.11582	7	7	90.6265	32.358	5.06618	8.2887	10	7
	e6e9236c2894b36ad7b180d77300cd3e1213c3c3691be48a743e096cbdd737d7	70	17.6343	16.9255	1	1	9.39348	4.049	41.2364	72c80a70-b640-4da9-8b17-142ccaf3af67	3	3	0.582989	0.55184	15.043	7	7	85.0823	5.54342	7.79731	16.4778	10	7
	e6e9236c2894b36ad7b180d77300cd3e1213c3c3691be48a743e096cbdd737d7	71	12.6297	13.0029	1	1	9.40644	3.63014	39.7091	3cc1e5df-900d-43d8-bfd0-3edef657d5b4	3	3	1.45749	0.686679	12.4861	7	7	58.8539	8.28419	6.8849	12.5059	10	7
	e6e9236c2894b36ad7b180d77300cd3e1213c3c3691be48a743e096cbdd737d7	72	37.4991	15.5434	1	1	9.3473	4.60748	42.7636	0ce483c5-b5e4-4ac8-95c4-1312807f2f83	3	3	0.492863	0.661377	16.066	7	7	96.5971	10.9564	6.89564	16.3086	10	7
	e6e9236c2894b36ad7b180d77300cd3e1213c3c3691be48a743e096cbdd737d7	73	11.7018	14.9432	1	1	9.34983	4.7471	36.6545	d2979e05-4dc5-470b-b485-c23447194497	3	3	0.690437	1.27759	12.5364	7	7	113.656	21.4413	3.8399	13.9925	10	7
	e6e9236c2894b36ad7b180d77300cd3e1213c3c3691be48a743e096cbdd737d7	74	4.79288	9.59256	1	1	8.27964	4.32824	38.1818	f2077fd5-53ac-49a6-ab6a-3b8362e10fee	3	3	0.920485	0.539329	8.76982	7	7	34.1182	12.1228	5.98917	9.04574	10	7
	e6e9236c2894b36ad7b180d77300cd3e1213c3c3691be48a743e096cbdd737d7	75	17.7128	17.8903	1	1	9.26207	5.30558	39.7091	8754a441-3291-4966-afb9-8c46719b02ec	3	3	0.464944	0.871002	17.1777	7	7	102.141	5.64217	3.92159	19.1882	10	7
	e6e9236c2894b36ad7b180d77300cd3e1213c3c3691be48a743e096cbdd737d7	76	14.0425	8.50927	1	1	8.67374	3.35089	39.7091	9ee62cb5-50c8-4eab-8b59-a411dcfeabf9	3	3	0.433344	0.566516	6.40302	7	7	11.0884	2.3173	4.49816	8.34219	10	7
	e6e9236c2894b36ad7b180d77300cd3e1213c3c3691be48a743e096cbdd737d7	77	23.7162	19.1461	1	1	9.31699	4.7471	41.2364	27535236-981d-48e8-9b11-dbba98d0adee	3	3	0.981646	0.931893	17.475	7	7	69.5158	3.90711	8.42864	19.0229	10	7
	e6e9236c2894b36ad7b180d77300cd3e1213c3c3691be48a743e096cbdd737d7	78	16.9638	14.8412	1	1	9.23604	6.14331	44.2909	2fb822a2-a390-422c-96cd-88cbdff334d7	3	3	0.872576	1.63344	10.8309	7	7	68.8761	3.37872	10.544	13.238	10	7
	e6e9236c2894b36ad7b180d77300cd3e1213c3c3691be48a743e096cbdd737d7	79	5.50303	10.5872	1	1	8.67906	5.58482	33.6	6c5b4183-03df-4ce6-919e-20c8007f81d4	3	3	0.466013	0.583668	8.97362	7	7	65.8908	16.1865	3.36727	9.17221	10	7
	e6e9236c2894b36ad7b180d77300cd3e1213c3c3691be48a743e096cbdd737d7	80	4.69645	7.01734	1	1	7.62472	4.46786	35.1273	c32c2045-0edb-4e33-8b8e-3bfb68428340	3	3	1.17294	1.899	5.81034	7	7	23.0298	3.19291	4.7907	6.89915	10	7
	e6e9236c2894b36ad7b180d77300cd3e1213c3c3691be48a743e096cbdd737d7	81	20.955	10.2522	1	1	8.04216	5.72444	41.2364	37d53608-6c6e-4a78-b7cb-01e60820e806	3	3	0.617455	0.736857	9.09216	7	7	133.487	38.2732	5.80871	9.08527	10	7
	e6e9236c2894b36ad7b180d77300cd3e1213c3c3691be48a743e096cbdd737d7	82	12.2319	15.657	1	1	8.1938	3.63014	145.091	9a1c2672-0a72-468d-9b1d-e3affe69cbbc	3	3	0.891364	1.25978	13.9461	7	7	178.694	29.3437	12.7548	10.57	10	7
	e6e9236c2894b36ad7b180d77300cd3e1213c3c3691be48a743e096cbdd737d7	83	24.6346	13.1378	1	1	8.52992	4.88672	54.9818	e6950d36-9d9e-4a41-8419-21c1f086f114	3	3	0.958577	0.882117	9.968	7	7	127.09	6.04936	7.32875	10.9082	10	7
	e6e9236c2894b36ad7b180d77300cd3e1213c3c3691be48a743e096cbdd737d7	84	6.74864	13.8661	1	1	8.73545	4.049	45.8182	67ccf092-a2c1-4a50-b5d8-76c67e88e27f	3	3	0.6676	0.549342	10.2293	7	7	99.5825	7.24849	5.88239	11.1906	10	7
	e6e9236c2894b36ad7b180d77300cd3e1213c3c3691be48a743e096cbdd737d7	85	11.4913	10.8338	1	1	8.75815	3.90938	39.7091	b336dd0b-1d94-4db2-bbde-378127a3b053	3	3	1.33503	0.923984	6.57739	7	7	66.3172	18.0221	8.9481	8.45007	10	7
	e6e9236c2894b36ad7b180d77300cd3e1213c3c3691be48a743e096cbdd737d7	86	17.4447	10.103	1	1	9.11989	4.32824	35.1273	f77d6e72-6710-478c-9056-80b36c40fe4e	3	3	0.54369	0.690479	8.0867	7	7	34.5447	4.20608	4.77709	7.63656	10	7
	e6e9236c2894b36ad7b180d77300cd3e1213c3c3691be48a743e096cbdd737d7	87	10.0493	10.4166	1	1	8.4537	4.32824	61.0909	2458336d-1a61-414a-9a7c-2864067c6e12	3	3	0.475872	1.20508	5.49197	7	7	84.0161	6.07072	43.9298	7.04158	10	7
	e6e9236c2894b36ad7b180d77300cd3e1213c3c3691be48a743e096cbdd737d7	88	-2.71849	7.82255	1	1	9.87437	1.67545	142.036	d7bd72cf-a5d1-428f-91d3-5aba6171dc35	3	3	1.58002	1.20437	4.42958	7	7	29.2137	23.2172	66.3051	3.89453	10	7
	e6e9236c2894b36ad7b180d77300cd3e1213c3c3691be48a743e096cbdd737d7	89	2.35235	8.66673	1	1	9.18012	6.00369	51.9273	a8e762c4-d030-4514-87cb-48829daf58e0	3	3	0.986906	0.92201	6.77388	7	7	54.1626	6.66841	15.9599	6.04858	10	7
	e6e9236c2894b36ad7b180d77300cd3e1213c3c3691be48a743e096cbdd737d7	90	13.8739	13.3856	1	1	8.6711	3.90938	39.7091	c50b4011-a0d9-4bfe-8012-838f2db0325a	3	3	1.09449	0.994211	10.0097	7	7	68.8761	3.23465	7.63464	12.7486	10	7
	e6e9236c2894b36ad7b180d77300cd3e1213c3c3691be48a743e096cbdd737d7	91	8.94293	9.07549	1	1	8.58223	3.76976	58.0364	d5f838a0-48c5-4524-95dd-d0d2df9e57a1	3	3	2.42431	0.654363	4.24832	7	7	54.1626	3.53687	24.7391	7.06842	10	7
	e6e9236c2894b36ad7b180d77300cd3e1213c3c3691be48a743e096cbdd737d7	92	2.9394	11.6597	1	1	8.66598	4.88672	47.3455	40dc3618-af26-4bdb-8359-d2001aeaf5b9	3	3	2.84368	0.611444	8.6474	7	7	156.304	5.57527	5.11598	10.5552	10	7
	e6e9236c2894b36ad7b180d77300cd3e1213c3c3691be48a743e096cbdd737d7	93	9.97927	10.4277	1	1	9.36807	4.46786	53.4545	5c101e13-ba2e-4f3f-a4a2-4c9eca11b193	3	3	0.832796	0.65858	10.0243	7	7	81.4572	7.26708	22.3241	9.65661	10	7
	e6e9236c2894b36ad7b180d77300cd3e1213c3c3691be48a743e096cbdd737d7	94	13.9435	16.1126	1	1	8.92539	5.30558	38.1818	1f8e8805-243b-4f2b-b305-ec9b6c7c1b79	3	3	0.84212	0.66764	13.0519	7	7	221.555	71.9493	7.57135	11.9617	10	7
	e6e9236c2894b36ad7b180d77300cd3e1213c3c3691be48a743e096cbdd737d7	95	28.7887	17.9695	1	1	9.04205	5.16596	42.7636	c821b3f9-c661-4e4c-8c69-440432769a7a	3	3	1.07024	0.819017	17.9512	7	7	424.985	28.3491	10.9327	15.6552	10	7
	e6e9236c2894b36ad7b180d77300cd3e1213c3c3691be48a743e096cbdd737d7	96	-0.306455	7.78777	1	1	9.40909	5.02634	53.4545	bfbb0893-33e4-43ab-ae51-653033ff3cce	3	3	0.299428	0.70577	5.58433	7	7	43.7139	3.81247	5.47959	6.99157	10	7
	e6e9236c2894b36ad7b180d77300cd3e1213c3c3691be48a743e096cbdd737d7	97	11.674	9.45317	1	1	9.90365	4.18862	41.2364	5a67dd96-4648-42f2-8bd1-0f9f19dbe942	3	3	0.51779	2.94832	5.39714	7	7	23.4563	2.57372	12.7146	6.46925	10	7
	e6e9236c2894b36ad7b180d77300cd3e1213c3c3691be48a743e096cbdd737d7	98	5.09358	8.40872	1	1	8.44315	4.7471	47.3455	e5303b1d-c1c8-4156-9293-7ca458c36688	3	3	0.468116	1.61971	7.61667	7	7	62.479	4.5698	5.51462	8.64112	10	7
	e6e9236c2894b36ad7b180d77300cd3e1213c3c3691be48a743e096cbdd737d7	99	15.976	9.68186	1	1	9.34859	4.60748	39.7091	720b785b-ccc2-4d58-9b93-14661036c782	3	3	1.38741	1.74077	6.41057	7	7	96.8104	42.5848	9.55862	6.46702	10	7
	e6e9236c2894b36ad7b180d77300cd3e1213c3c3691be48a743e096cbdd737d7	100	10.8327	11.8288	1	1	9.3778	4.60748	47.3455	3b8a50ae-1ce7-4ebd-adf2-f885a79b5702	3	3	0.467849	0.975968	8.91833	7	7	53.5229	12.0934	5.34974	11.6349	10	7
	e6e9236c2894b36ad7b180d77300cd3e1213c3c3691be48a743e096cbdd737d7	101	19.7948	10.2662	1	1	9.4354	5.16596	47.3455	1645f450-34e4-4308-bc59-372004008346	3	3	0.486179	2.39805	9.32648	7	7	67.5967	4.76433	7.88631	9.02896	10	7
	e6e9236c2894b36ad7b180d77300cd3e1213c3c3691be48a743e096cbdd737d7	102	9.03993	8.44606	1	1	8.7672	3.90938	35.1273	744a1755-169f-4389-8d49-5c7ee2cf12bb	3	3	0.409386	0.972396	6.41137	7	7	13.8605	6.15321	4.25538	7.35176	10	7
	e6e9236c2894b36ad7b180d77300cd3e1213c3c3691be48a743e096cbdd737d7	103	12.4561	9.51264	1	1	9.38019	5.86407	50.4	c4ca2533-abfa-4bfc-923d-935dc50d2be8	3	3	0.545151	1.4413	6.61837	7	7	59.7068	3.24478	17.1381	9.62041	10	7
	e6e9236c2894b36ad7b180d77300cd3e1213c3c3691be48a743e096cbdd737d7	104	14.3493	15.9091	1	1	9.78183	5.72444	42.7636	2ba48860-9704-429d-b2f6-95a68104034f	3	3	0.542922	2.46016	11.1035	7	7	108.539	4.36402	10.3496	13.1407	10	7
	e6e9236c2894b36ad7b180d77300cd3e1213c3c3691be48a743e096cbdd737d7	105	9.24258	17.0183	1	1	9.90965	6.00369	111.491	8afe6846-cb32-4a35-87dc-910f7f473f0c	3	3	0.73122	1.43549	15.3993	7	7	892.831	183.981	43.7408	11.8861	10	7
	e6e9236c2894b36ad7b180d77300cd3e1213c3c3691be48a743e096cbdd737d7	106	17.3491	10.2635	1	1	9.59519	3.63014	44.2909	4b998a9f-4a6c-4181-a8f9-0742405897c5	3	3	0.612578	0.446552	8.96152	7	7	40.7286	7.04869	13.8583	8.3032	10	7
	e6e9236c2894b36ad7b180d77300cd3e1213c3c3691be48a743e096cbdd737d7	107	11.7846	9.15652	1	1	10.9961	6.28293	38.1818	b997d51d-05c0-4380-9f39-1deb2ee51ec2	3	3	0.627225	2.71739	7.03937	7	7	60.5598	8.41913	3.78621	8.33811	10	7
	e6e9236c2894b36ad7b180d77300cd3e1213c3c3691be48a743e096cbdd737d7	108	11.8399	9.84534	1	1	11.1982	4.18862	56.5091	0dcfb8c8-01f9-4856-8908-31d8e05d9732	3	3	0.790127	0.553945	8.49627	7	7	52.67	2.59885	22.9604	11.0789	10	7
	e6e9236c2894b36ad7b180d77300cd3e1213c3c3691be48a743e096cbdd737d7	109	3.82841	11.9871	1	1	11.153	5.30558	65.6727	20041b22-b7ce-4429-9cd9-38b2c6956acf	3	3	0.50043	0.64933	9.85901	7	7	95.3177	13.514	45.0922	8.39737	10	7
	e6e9236c2894b36ad7b180d77300cd3e1213c3c3691be48a743e096cbdd737d7	110	1.97074	11.3572	1	1	11.4509	5.30558	38.1818	9daf391b-4c25-4935-8f4c-634e47641657	3	3	0.985793	2.36511	9.89785	7	7	106.619	16.4719	5.11326	11.4372	10	7
	e6e9236c2894b36ad7b180d77300cd3e1213c3c3691be48a743e096cbdd737d7	111	20.5523	11.5593	1	1	11.6988	4.18862	39.7091	51c31f17-0c03-47e2-8b49-e553327d06f4	3	3	0.379431	0.694088	11.2455	7	7	49.8979	5.8215	7.78851	10.0551	10	7
	e6e9236c2894b36ad7b180d77300cd3e1213c3c3691be48a743e096cbdd737d7	112	9.9407	10.0472	1	1	11.533	6.28293	61.0909	170c1257-828f-461a-a456-2a13dfaff1dc	3	3	0.572491	2.62416	7.84382	7	7	130.289	5.76641	28.2504	7.61209	10	7
	e6e9236c2894b36ad7b180d77300cd3e1213c3c3691be48a743e096cbdd737d7	113	9.47778	13.6526	1	1	9.26658	4.18862	33.6	7f655a0d-019e-47d5-addb-c34eb6f1d20f	3	3	1.1108	0.906751	9.45877	7	7	107.046	26.4109	2.92519	13.2962	10	7
	e6e9236c2894b36ad7b180d77300cd3e1213c3c3691be48a743e096cbdd737d7	114	24.81	16.8839	1	1	11.1967	7.95837	79.4182	854b9045-16a2-437e-a31a-163a40de4973	3	3	0.675899	2.46082	13.5957	7	7	368.477	15.6416	38.5434	14.0551	10	7
	e6e9236c2894b36ad7b180d77300cd3e1213c3c3691be48a743e096cbdd737d7	115	17.8482	12.7935	1	1	11.7046	3.90938	61.0909	ed394eda-78e3-4135-8e92-142d2e8cd690	3	3	0.793416	0.369053	9.76313	7	7	112.803	5.08997	8.79528	9.80755	10	7
	e6e9236c2894b36ad7b180d77300cd3e1213c3c3691be48a743e096cbdd737d7	116	13.5049	10.3954	1	1	9.98435	3.76976	44.2909	f4253173-e5b0-40e3-b44d-b2f40ecbbab5	3	3	1.01245	0.616824	7.5406	7	7	46.2728	6.29533	13.2188	8.84632	10	7
	e6e9236c2894b36ad7b180d77300cd3e1213c3c3691be48a743e096cbdd737d7	117	15.3053	9.74613	1	1	12.2327	4.049	35.1273	4dc87c66-5fd9-4f31-aa87-4296eff4dcae	3	3	0.698463	1.50417	5.94066	7	7	15.14	2.58993	3.96077	9.69329	10	7
	e6e9236c2894b36ad7b180d77300cd3e1213c3c3691be48a743e096cbdd737d7	118	16.8402	8.80513	1	1	9.99389	4.60748	39.7091	16add49e-c67a-49d1-8551-1485711593bb	3	3	0.317265	1.23129	6.14832	7	7	22.8165	4.38208	7.82242	6.68324	10	7
	e6e9236c2894b36ad7b180d77300cd3e1213c3c3691be48a743e096cbdd737d7	119	15.0113	11.1057	1	1	12.7154	4.7471	56.5091	d93401f8-b96f-46db-899e-93205533ae2b	3	3	0.752817	1.46643	6.31197	7	7	61.626	3.8325	20.7862	8.62749	10	7
	e6e9236c2894b36ad7b180d77300cd3e1213c3c3691be48a743e096cbdd737d7	120	19.1467	7.74282	1	1	10.485	6.42255	45.8182	8851541d-5162-4a08-acaa-3f28141e2fd6	3	3	1.13542	2.66974	5.37268	7	7	71.2217	4.4268	17.0277	7.36829	10	7
	e6e9236c2894b36ad7b180d77300cd3e1213c3c3691be48a743e096cbdd737d7	121	17.8988	9.62128	1	1	10.6835	4.18862	38.1818	080fafd5-9b36-44fe-90c1-0210657e7d5f	3	3	2.28163	1.43025	7.5871	7	7	58.6407	4.20426	13.4121	10.5808	10	7
	e6e9236c2894b36ad7b180d77300cd3e1213c3c3691be48a743e096cbdd737d7	122	16.1647	11.9897	1	1	10.4681	4.7471	64.1455	457c2329-e2ab-4a81-8be0-cfa85448d431	3	3	0.877498	2.8765	5.99313	7	7	89.9867	6.96005	23.888	6.80961	10	7
	0a1046659922bfb9e95343369b3e1b93bdfd8ad588558b753266aca5f7e54783	1	26.2446	18.7885	1	1	18.5942	4.31749	35.1273	6faea0e2-b228-4ad6-ae5a-77bf1e73fc6b	3	3	0.505318	0.842388	17.4224	7	7	65.2805	8.90205	4.51902	16.8684	10	7
	0a1046659922bfb9e95343369b3e1b93bdfd8ad588558b753266aca5f7e54783	2	12.767	17.4884	1	1	18.1493	4.17358	38.1818	a086bd26-64e3-4913-a51a-550e5b08af12	3	3	1.33729	0.892883	12.9327	7	7	32.0907	3.63016	5.72825	17.0772	10	7
	0a1046659922bfb9e95343369b3e1b93bdfd8ad588558b753266aca5f7e54783	3	9.78923	12.7628	1	1	16.6088	4.60532	47.3455	b52c89be-ce1f-4194-8769-61c1a8c8aca1	3	3	0.741151	1.09175	10.0976	7	7	32.5303	5.24156	11.7351	11.282	10	7
	0a1046659922bfb9e95343369b3e1b93bdfd8ad588558b753266aca5f7e54783	4	6.60858	15.9262	1	1	18.463	4.46141	35.1273	db9b011c-2ca3-4c92-a7d7-4c66a05ab7af	3	3	0.480311	0.858969	15.4521	7	7	20.0018	3.18604	3.64186	17.9858	10	7
	0a1046659922bfb9e95343369b3e1b93bdfd8ad588558b753266aca5f7e54783	5	-0.593365	16.6109	1	1	18.1912	5.18099	47.3455	6659983a-6d89-4943-89b3-58f95c77e0cd	3	3	0.936779	1.29618	12.0464	7	7	54.9499	12.2856	5.88216	13.5798	10	7
	0a1046659922bfb9e95343369b3e1b93bdfd8ad588558b753266aca5f7e54783	6	45.1337	24.4285	1	1	18.0271	4.89316	38.1818	47876027-adc5-4381-8eeb-2287613e1698	3	3	0.432583	1.42383	20.216	7	7	35.3877	3.71493	5.08573	23.5329	10	7
	0a1046659922bfb9e95343369b3e1b93bdfd8ad588558b753266aca5f7e54783	7	22.8919	21.8298	1	1	16.2996	4.17358	35.1273	2016a479-f5f0-4a9b-afa2-86277dd269f5	3	3	1.26459	0.8202	15.0031	7	7	78.9081	20.3859	3.43625	19.2185	10	7
	0a1046659922bfb9e95343369b3e1b93bdfd8ad588558b753266aca5f7e54783	8	36.6303	29.7371	1	1	13.7064	5.61274	42.7636	79783a75-7c54-44a3-bd7b-a49062313817	3	3	1.37209	0.821809	23.7042	7	7	306.401	32.0506	4.95096	25.2718	10	7
	0a1046659922bfb9e95343369b3e1b93bdfd8ad588558b753266aca5f7e54783	9	12.4788	13.7917	1	1	17.3778	4.17358	38.1818	ad9b2e55-6ce0-4f41-af0c-d8e2960f5594	3	3	1.42704	0.534888	11.791	7	7	56.9281	16.76	8.53017	10.4552	10	7
	0a1046659922bfb9e95343369b3e1b93bdfd8ad588558b753266aca5f7e54783	10	4.40059	10.31	1	1	14.7952	4.74924	50.4	2789c28a-945b-4f39-9bc8-9b9a37a4e4cd	3	3	0.456687	0.669988	10.0356	7	7	78.2487	7.05601	6.71773	9.52954	10	7
	0a1046659922bfb9e95343369b3e1b93bdfd8ad588558b753266aca5f7e54783	11	27.9141	13.3715	1	1	17.4085	7.9154	47.3455	27c32cdd-2ffa-4842-abb7-d233eccf2c47	3	3	0.755482	1.18376	10.1538	7	7	251.451	75.7262	6.76162	11.2112	10	7
	0a1046659922bfb9e95343369b3e1b93bdfd8ad588558b753266aca5f7e54783	12	20.3713	13.0705	1	1	16.7832	6.76407	36.6545	47441882-e796-498c-850a-3288530d273d	3	3	0.390292	1.75852	9.87739	7	7	77.1497	17.0781	34.24	8.65974	10	7
	0a1046659922bfb9e95343369b3e1b93bdfd8ad588558b753266aca5f7e54783	13	15.6382	13.0938	1	1	17.5812	3.59791	39.7091	05700753-ad79-47c7-985e-1f7f378632fd	3	3	0.297821	0.672478	8.17852	7	7	12.5286	2.85583	6.78604	11.2285	10	7
	0a1046659922bfb9e95343369b3e1b93bdfd8ad588558b753266aca5f7e54783	14	10.1063	12.0345	1	1	17.7318	4.74924	36.6545	64ad956f-6379-42f7-97ad-49a29a2dc931	3	3	0.724274	0.652305	10.617	7	7	33.8491	3.95348	3.26081	13.8232	10	7
	0a1046659922bfb9e95343369b3e1b93bdfd8ad588558b753266aca5f7e54783	15	29.929	12.4595	1	1	13.3448	5.03707	41.2364	5a6e6e24-2022-4ba8-8ffd-364a23529dd5	3	3	0.852868	1.89213	11.2135	7	7	73.8527	4.69299	5.59792	12.4506	10	7
	0a1046659922bfb9e95343369b3e1b93bdfd8ad588558b753266aca5f7e54783	16	13.8074	10.6321	1	1	14.1991	3.45399	42.7636	6c1d49a5-a469-415d-8109-f65d3e2c6223	3	3	0.654277	0.50889	7.58782	7	7	23.2988	2.62298	10.8738	9.91719	10	7
	0a1046659922bfb9e95343369b3e1b93bdfd8ad588558b753266aca5f7e54783	17	18.859	17.8098	1	1	19.1911	4.46141	35.1273	3c91e513-7420-40fd-9507-af540d354675	3	3	0.418942	0.432562	15.7945	7	7	59.3459	19.5132	4.05815	14.6398	10	7
	0a1046659922bfb9e95343369b3e1b93bdfd8ad588558b753266aca5f7e54783	18	46.2466	17.4616	1	1	19.3383	3.88574	36.6545	0809e78f-7e11-4a9f-9027-bc7c8b26b8e1	3	3	0.513393	0.936328	13.0852	7	7	45.0589	13.4102	4.17724	16.2691	10	7
	0a1046659922bfb9e95343369b3e1b93bdfd8ad588558b753266aca5f7e54783	19	10.7657	12.1894	1	1	18.3019	4.02966	45.8182	0af8d66c-d5cf-473a-8fd1-b14c0f5160fb	3	3	0.516896	0.945304	8.87725	7	7	25.4968	13.291	16.4057	10.4488	10	7
	0a1046659922bfb9e95343369b3e1b93bdfd8ad588558b753266aca5f7e54783	20	28.2182	22.4811	1	1	16.5639	5.03707	50.4	ce4b5f0c-3268-4f62-a0d2-23137c35969e	3	3	0.44742	0.791181	18.3995	7	7	126.385	12.3224	18.4911	16.2514	10	7
	0a1046659922bfb9e95343369b3e1b93bdfd8ad588558b753266aca5f7e54783	21	34.833	26.8864	1	1	20.0533	5.32491	50.4	0e08e95d-02ea-426f-a57a-909624cff770	3	3	1.16696	0.89867	22.2312	7	7	257.605	8.52337	9.35614	24.7746	10	7
	0a1046659922bfb9e95343369b3e1b93bdfd8ad588558b753266aca5f7e54783	22	18.1507	10.426	1	1	15.1711	3.59791	45.8182	8d2df3de-5be9-477a-bf1a-e129cd768f62	3	3	2.20938	0.603789	6.91682	7	7	36.4867	23.1822	14.2775	7.15468	10	7
	0a1046659922bfb9e95343369b3e1b93bdfd8ad588558b753266aca5f7e54783	23	25.9804	16.6903	1	1	18.2287	4.17358	108.436	1cbc1258-e0c7-4e9a-a978-851ea09f587b	3	3	1.81889	0.386531	8.88886	7	7	219.8	24.4761	12.8244	9.3317	10	7
	0a1046659922bfb9e95343369b3e1b93bdfd8ad588558b753266aca5f7e54783	24	29.1142	12.4422	1	1	18.0336	4.02966	58.0364	2cc5c652-242f-4373-a456-a5a022c512c4	3	3	0.469011	0.386943	8.82809	7	7	34.2887	19.3564	53.4354	7.35044	10	7
	0a1046659922bfb9e95343369b3e1b93bdfd8ad588558b753266aca5f7e54783	25	13.634	13.0878	1	1	18.1599	3.74183	35.1273	290baf43-b6f8-4477-877c-40fbc6004332	3	3	0.969705	0.4749	13.2169	7	7	35.6075	8.31937	5.04084	13.4993	10	7
	0a1046659922bfb9e95343369b3e1b93bdfd8ad588558b753266aca5f7e54783	26	9.99895	12.7867	1	1	16.781	3.74183	42.7636	d6364365-9ef3-4071-9f65-a15cd7e443e8	3	3	0.645912	0.566536	12.0963	7	7	23.2988	3.13211	4.37778	14.3703	10	7
	0a1046659922bfb9e95343369b3e1b93bdfd8ad588558b753266aca5f7e54783	27	-7.91552	14.7262	1	1	18.4635	3.74183	36.6545	45fcab96-140c-4307-8a35-ac34cfc40216	3	3	0.575085	0.651203	16.4874	7	7	21.98	7.40222	4.0544	16.6983	10	7
	0a1046659922bfb9e95343369b3e1b93bdfd8ad588558b753266aca5f7e54783	28	26.4642	13.2595	1	1	17.2376	4.74924	36.6545	e960a47b-93e6-4dcc-b1af-376dfda289ad	3	3	0.617362	0.835185	11.6242	7	7	23.2988	2.6142	3.58746	16.8277	10	7
	0a1046659922bfb9e95343369b3e1b93bdfd8ad588558b753266aca5f7e54783	29	12.5313	11.331	1	1	17.2225	3.74183	35.1273	41e6f8bf-6a92-47f9-82da-5463e3a4ad96	3	3	0.488127	0.668316	8.49723	7	7	12.7484	4.03637	3.17135	9.69586	10	7
	0a1046659922bfb9e95343369b3e1b93bdfd8ad588558b753266aca5f7e54783	30	19.0221	13.8349	1	1	19.268	3.88574	36.6545	e90a2a6e-505a-4011-a405-7cb54963602b	3	3	0.51446	0.543594	12.7365	7	7	25.277	5.89952	5.27679	13.8315	10	7
	0a1046659922bfb9e95343369b3e1b93bdfd8ad588558b753266aca5f7e54783	31	35.8102	13.3353	1	1	20.7683	4.02966	39.7091	bc4719a3-33a4-4349-8780-60df6cbc7701	3	3	1.48312	1.12123	9.16158	7	7	69.2369	16.9114	10.0771	10.6369	10	7
	0a1046659922bfb9e95343369b3e1b93bdfd8ad588558b753266aca5f7e54783	32	19.4355	24.5048	1	1	20.9331	6.18841	44.2909	c7bfb5f8-03f9-4978-bf40-1c815450bf6a	3	3	0.590419	0.9255	23.9806	7	7	596.536	336.104	12.58	17.7243	10	7
	0a1046659922bfb9e95343369b3e1b93bdfd8ad588558b753266aca5f7e54783	33	24.115	12.7759	1	1	22.3678	3.45399	38.1818	2300d972-65ae-4356-8009-d9b8a7ca45d3	3	3	0.41095	0.366588	13.9044	7	7	12.5286	4.59032	5.11973	13.2178	10	7
	0a1046659922bfb9e95343369b3e1b93bdfd8ad588558b753266aca5f7e54783	34	25.1929	21.1052	1	1	20.9714	6.33232	42.7636	4157f456-2502-4a6b-a1dd-fa8ac8094504	3	3	0.555767	1.36828	17.2997	7	7	618.956	219.143	10.0321	14.7874	10	7
	0a1046659922bfb9e95343369b3e1b93bdfd8ad588558b753266aca5f7e54783	35	19.8878	14.2921	1	1	22.0204	4.89316	59.5636	45b82649-1850-4efd-b0ca-b2ca1111a96c	3	3	0.944129	1.61462	11.273	7	7	85.7218	16.5638	18.3469	10.6882	10	7
	0a1046659922bfb9e95343369b3e1b93bdfd8ad588558b753266aca5f7e54783	36	27.9226	16.9102	1	1	16.5579	5.32491	183.273	ae86b385-3765-4256-9cb8-a3874aedeeaf	3	3	1.4922	1.56157	10.4694	7	7	234.306	34.1595	142.402	8.82583	10	7
	0a1046659922bfb9e95343369b3e1b93bdfd8ad588558b753266aca5f7e54783	37	15.8713	13.467	1	1	18.9704	5.03707	33.6	150d1ab4-fd88-4221-8fbe-bba0cc9814dd	3	3	0.289056	1.439	7.89339	7	7	38.0253	19.7029	2.68171	10.5794	10	7
	19fb6a38a22b3ad556bad2567645240b9fbd37951a3b45dd103833a2b2f9a389	1	5.48416	4.861	1	1	3.84699	3.90625	42.7636	5c5944c5-25b8-4449-9a20-e3c358c6b98a	3	3	0.491074	0.648575	4.34918	7	7	25.9943	2.57971	9.19613	4.86183	10	7
	19fb6a38a22b3ad556bad2567645240b9fbd37951a3b45dd103833a2b2f9a389	2	3.67866	6.61416	1	1	3.79352	4.04576	84	ddbb1d6b-49e6-4da1-97bb-89feaea79f6d	3	3	0.856889	0.884598	4.95347	7	7	150.639	2.60599	25.4548	5.58556	10	7
	19fb6a38a22b3ad556bad2567645240b9fbd37951a3b45dd103833a2b2f9a389	3	5.65414	4.60247	1	1	3.86223	4.7433	56.5091	d0b0f83d-b536-45f3-86fa-7038a6ddc9f4	3	3	1.56478	1.21314	3.277	7	7	84.5881	17.4402	32.2457	3.72184	10	7
	19fb6a38a22b3ad556bad2567645240b9fbd37951a3b45dd103833a2b2f9a389	4	7.6787	4.91121	1	1	2.84013	3.62723	39.7091	a20c05da-6124-45a7-a909-66ac31b73f9b	3	3	1.02056	0.530777	4.19711	7	7	24.2898	16.2688	8.32751	4.42828	10	7
	19fb6a38a22b3ad556bad2567645240b9fbd37951a3b45dd103833a2b2f9a389	5	17.4853	5.41759	1	1	3.95771	3.62723	38.1818	fb252709-872c-4076-b28f-acba2484fdd5	3	3	0.410722	0.398662	5.59092	7	7	11.9318	2.14149	4.82235	6.46261	10	7
	19fb6a38a22b3ad556bad2567645240b9fbd37951a3b45dd103833a2b2f9a389	6	14.077	5.50823	1	1	3.32784	4.32478	38.1818	2414ac4b-c0e2-4904-bd89-abce96e28ea5	3	3	0.385778	0.526943	5.10603	7	7	15.1278	3.44294	3.75899	5.77676	10	7
	19fb6a38a22b3ad556bad2567645240b9fbd37951a3b45dd103833a2b2f9a389	7	7.8667	5.91085	1	1	3.62109	3.76674	42.7636	e80d48e2-4c72-411a-a25d-d6a9257d53a7	3	3	0.743562	0.987729	3.24141	7	7	25.9943	2.46395	4.64365	5.41655	10	7
	19fb6a38a22b3ad556bad2567645240b9fbd37951a3b45dd103833a2b2f9a389	8	2.97154	5.4359	1	1	4.26928	4.7433	42.7636	c07747e5-0ace-4de7-8a37-4dd3ada0bcd9	3	3	2.09568	0.923771	4.3813	7	7	41.9744	17.0558	7.41718	5.31977	10	7
	cc023c28e5d05e9eece500b92ed0243b74cc5d96ea56cba472bc04149d7c0911	1	16.388	12.4179	1	1	10.1864	4.8185	35.1273	a67cddc3-2a7e-440f-ac37-e00b037699ed	3	3	0.779114	0.573206	12.1212	7	7	76.6218	11.2633	4.68677	12.1839	10	7
	cc023c28e5d05e9eece500b92ed0243b74cc5d96ea56cba472bc04149d7c0911	2	6.63529	11.1738	1	1	10.8108	5.5271	35.1273	056b7e44-09be-4c4d-8455-742ac74ac150	3	3	1.09122	0.726401	9.0745	7	7	54.3279	10.9733	3.19139	10.4531	10	7
	cc023c28e5d05e9eece500b92ed0243b74cc5d96ea56cba472bc04149d7c0911	3	11.5654	13.9787	1	1	9.81611	5.24366	41.2364	588ebc92-40c6-4e99-a0b9-342599497db8	3	3	1.01361	1.37739	12.5526	7	7	133.547	6.48677	5.078	14.7153	10	7
	cc023c28e5d05e9eece500b92ed0243b74cc5d96ea56cba472bc04149d7c0911	4	5.19391	7.9349	1	1	8.63824	4.25161	45.8182	2178e3da-cfe1-429e-bcad-0c3b7954f742	3	3	0.453742	0.840059	5.52585	7	7	28.5708	2.30562	13.2777	7.07116	10	7
	cc023c28e5d05e9eece500b92ed0243b74cc5d96ea56cba472bc04149d7c0911	5	6.85229	8.86695	1	1	10.1485	4.67677	33.6	449dc662-3f58-4e60-922e-1644b1120391	3	3	0.56333	0.695761	8.27896	7	7	46.3194	5.94541	3.59962	10.0483	10	7
	cc023c28e5d05e9eece500b92ed0243b74cc5d96ea56cba472bc04149d7c0911	6	9.97323	11.5969	1	1	9.58682	4.96022	36.6545	797730fc-0e2c-47b8-9b34-1ddd8e95b0fd	3	3	0.350925	0.965461	12.8659	7	7	43.5056	5.03808	4.09145	12.9557	10	7
	cc023c28e5d05e9eece500b92ed0243b74cc5d96ea56cba472bc04149d7c0911	7	1.20632	10.2034	1	1	9.97277	4.53505	42.7636	7b98200a-2d02-49fc-b451-c2f3071e9b27	3	3	1.36861	0.651746	8.16165	7	7	56.4923	7.82319	9.91533	7.74217	10	7
	cc023c28e5d05e9eece500b92ed0243b74cc5d96ea56cba472bc04149d7c0911	8	8.41211	7.77362	1	1	10.5721	5.5271	45.8182	75da0a9b-48a7-46b2-94dc-172b4c517cab	3	3	0.661032	2.19711	6.92434	7	7	48.7003	3.09425	10.2143	8.04351	10	7
	cc023c28e5d05e9eece500b92ed0243b74cc5d96ea56cba472bc04149d7c0911	9	12.6019	10.4863	1	1	10.1232	6.51914	45.8182	23c615ba-06db-4790-89c6-453dd4723e63	3	3	1.20178	3.26592	6.71463	7	7	96.7513	4.81067	13.3734	8.27984	10	7
	cc023c28e5d05e9eece500b92ed0243b74cc5d96ea56cba472bc04149d7c0911	10	21.6017	18.7959	1	1	12.6656	5.81054	54.9818	6d1b275e-bc85-4920-bfc8-f40ac6fc5ae0	3	3	0.675063	1.15571	15.7504	7	7	206.489	6.9508	22.4864	15.9834	10	7
	cc023c28e5d05e9eece500b92ed0243b74cc5d96ea56cba472bc04149d7c0911	11	18.1279	15.7531	1	1	10.8902	6.2357	59.5636	6079bebf-f489-4b9e-8fa0-21e6b9aaff06	3	3	0.689329	0.733396	13.2529	7	7	316.227	12.2069	23.4508	11.1667	10	7
	cc023c28e5d05e9eece500b92ed0243b74cc5d96ea56cba472bc04149d7c0911	12	8.92008	8.79526	1	1	11.3981	7.22774	35.1273	e6f9c8ac-f85e-42c7-bbd3-f73d15931c3f	3	3	0.710317	1.99568	6.90468	7	7	87.6605	14.2479	4.42169	7.91957	10	7
	cc023c28e5d05e9eece500b92ed0243b74cc5d96ea56cba472bc04149d7c0911	13	9.06917	9.79157	1	1	11.843	4.53505	36.6545	700c57ea-3f7a-4b0b-b54f-f9324359cfee	3	3	1.21028	1.15319	6.84466	7	7	56.0595	19.1145	6.88638	7.52386	10	7
	cc023c28e5d05e9eece500b92ed0243b74cc5d96ea56cba472bc04149d7c0911	14	5.39313	8.91836	1	1	12.119	4.67677	33.6	6dbe1f5e-615e-4165-9490-1879d60425ae	3	3	0.363418	0.492962	8.42291	7	7	39.3931	21.648	3.18031	7.46131	10	7
	cc023c28e5d05e9eece500b92ed0243b74cc5d96ea56cba472bc04149d7c0911	15	9.14152	8.80527	1	1	10.7313	4.53505	42.7636	ff7e3442-e478-468d-ac57-f74115f1a8cd	3	3	0.740168	1.60441	7.35449	7	7	79.0027	28.2232	11.0987	6.86754	10	7
	cc023c28e5d05e9eece500b92ed0243b74cc5d96ea56cba472bc04149d7c0911	16	9.31948	6.80422	1	1	10.7165	4.53505	53.4545	f9216d49-5ce4-40bc-abe2-8319ca888e17	3	3	0.327926	2.52387	4.67712	7	7	26.6228	3.1896	40.2311	5.05413	10	7
	cc023c28e5d05e9eece500b92ed0243b74cc5d96ea56cba472bc04149d7c0911	17	9.92892	8.51334	1	1	10.7819	4.25161	70.2545	d51c9b60-48d8-47d0-bda7-787be44d873f	3	3	1.63909	0.547889	6.28155	7	7	82.0329	14.8516	8.60527	6.75711	10	7
	cc023c28e5d05e9eece500b92ed0243b74cc5d96ea56cba472bc04149d7c0911	18	11.2669	9.12052	1	1	10.8169	4.53505	35.1273	3b69e494-2d61-4fe4-9c82-ad05bdc52ecd	3	3	0.474337	1.45898	5.73516	7	7	39.3931	6.0149	3.64635	8.24417	10	7
	cc023c28e5d05e9eece500b92ed0243b74cc5d96ea56cba472bc04149d7c0911	19	1.24616	9.22783	1	1	10.9068	3.82645	42.7636	10642e0b-17d2-4b0b-b8f6-e029e42d37c7	3	3	0.682355	0.524746	9.65184	7	7	30.9517	3.70477	3.90563	11.5206	10	7
	cc023c28e5d05e9eece500b92ed0243b74cc5d96ea56cba472bc04149d7c0911	20	8.97846	8.2898	1	1	12.1343	5.10194	44.2909	a48f86bc-6fc6-4566-9554-b8e0cd0f595f	3	3	3.27284	1.47356	5.14673	7	7	65.7995	3.9665	7.27699	7.93237	10	7
	cc023c28e5d05e9eece500b92ed0243b74cc5d96ea56cba472bc04149d7c0911	21	1.00895	9.16384	1	1	11.0532	3.68473	42.7636	f2ea1037-4145-4313-bb2a-2043758ba0b5	3	3	0.306464	0.870334	6.60523	7	7	13.8525	2.91555	5.83702	8.19031	10	7
	cc023c28e5d05e9eece500b92ed0243b74cc5d96ea56cba472bc04149d7c0911	22	12.554	8.68053	1	1	11.8643	4.96022	35.1273	9daf9953-1959-4062-a909-8f3899f994b9	3	3	0.398805	1.55038	6.51107	7	7	60.1719	21.6464	3.77398	6.34565	10	7
	cc023c28e5d05e9eece500b92ed0243b74cc5d96ea56cba472bc04149d7c0911	23	5.24152	8.17234	1	1	11.0272	3.68473	45.8182	7643415a-d07d-4972-922f-5c641f2157ef	3	3	0.630077	0.88433	7.46046	7	7	53.2457	5.12004	38.9869	7.26562	10	7
	cc023c28e5d05e9eece500b92ed0243b74cc5d96ea56cba472bc04149d7c0911	24	0.998477	8.26594	1	1	11.8058	3.82645	39.7091	f0fa19f7-e9ce-4873-bf88-3720463a7e32	3	3	0.536792	0.495564	7.20213	7	7	15.8005	6.20076	9.79063	5.75051	10	7
	cc023c28e5d05e9eece500b92ed0243b74cc5d96ea56cba472bc04149d7c0911	25	11.768	9.57066	1	1	12.5403	4.96022	38.1818	03b508a1-cf0d-47d4-8b61-61c16ec2d4b1	3	3	1.03821	1.36517	7.25954	7	7	49.7825	3.74548	4.48058	9.75918	10	7
	cc023c28e5d05e9eece500b92ed0243b74cc5d96ea56cba472bc04149d7c0911	26	8.02866	9.60816	1	1	12.6309	4.39333	45.8182	a99caf1b-1f27-4837-b2b0-c55e13b3d47a	3	3	2.76816	1.07632	6.23043	7	7	53.895	3.97971	4.62683	8.17109	10	7
	cc023c28e5d05e9eece500b92ed0243b74cc5d96ea56cba472bc04149d7c0911	27	13.7821	11.576	1	1	12.6353	4.53505	35.1273	8ba45d9c-819a-4578-aeff-1006bcaf57d4	3	3	0.437047	1.21239	10.2486	7	7	41.9905	12.9464	4.34384	10.3142	10	7
	cc023c28e5d05e9eece500b92ed0243b74cc5d96ea56cba472bc04149d7c0911	28	8.98307	7.37048	1	1	13.0373	4.8185	41.2364	6ee16584-4584-434d-a245-827f7e761c31	3	3	0.780957	0.790637	7.40784	7	7	38.9602	15.647	9.89632	7.31611	10	7
	cc023c28e5d05e9eece500b92ed0243b74cc5d96ea56cba472bc04149d7c0911	29	23.5743	16.408	1	1	12.7091	5.66882	99.2727	6121be39-7bda-4e0e-87bb-fc784b676271	3	3	0.934068	0.636999	17.6676	7	7	344.365	24.928	12.0937	15.3872	10	7
	cc023c28e5d05e9eece500b92ed0243b74cc5d96ea56cba472bc04149d7c0911	30	15.1793	8.65027	1	1	13.6226	3.40129	36.6545	816d816c-9689-49f7-9752-64106d3cccb6	3	3	0.322037	0.382273	8.84042	7	7	8.87428	2.78728	4.20965	9.18932	10	7
	cc023c28e5d05e9eece500b92ed0243b74cc5d96ea56cba472bc04149d7c0911	31	9.34764	11.1786	1	1	12.6591	4.67677	36.6545	d84b3a16-5973-4e23-a6ec-3c1acb0c04be	3	3	0.433663	0.716737	13.2699	7	7	68.1804	20.2521	4.44721	14.1005	10	7
	cc023c28e5d05e9eece500b92ed0243b74cc5d96ea56cba472bc04149d7c0911	32	25.1566	11.8594	1	1	12.7361	5.95226	53.4545	1e8da85a-3a2f-44d5-9bf6-011f3788a62c	3	3	3.20398	1.30805	9.01375	7	7	187.226	12.5207	4.89519	11.3534	10	7
	cc023c28e5d05e9eece500b92ed0243b74cc5d96ea56cba472bc04149d7c0911	33	32.5177	12.1626	1	1	13.9118	4.67677	73.3091	fd55a1ee-9dc7-413a-98f4-5266b3521aca	3	3	1.54191	0.495631	10.0921	7	7	152.594	3.08145	12.1202	11.4084	10	7
	cc023c28e5d05e9eece500b92ed0243b74cc5d96ea56cba472bc04149d7c0911	34	12.8761	11.976	1	1	13.4755	3.68473	35.1273	f5e2d295-83cf-4a7f-9c90-51d8a0f3f7ae	3	3	0.395155	0.745811	9.69904	7	7	25.1077	3.54756	3.38307	12.2085	10	7
	cc023c28e5d05e9eece500b92ed0243b74cc5d96ea56cba472bc04149d7c0911	35	15.0151	8.00241	1	1	13.4565	4.39333	39.7091	182e0dfc-5649-4c9d-8647-38a097cdae19	3	3	0.317092	1.74415	6.37322	7	7	22.5104	32.4721	7.06048	5.90442	10	7
	cc023c28e5d05e9eece500b92ed0243b74cc5d96ea56cba472bc04149d7c0911	36	7.37132	8.81398	1	1	13.3847	3.82645	33.6	5a0987cf-2d0b-430b-8340-ccde77c7524f	3	3	1.01775	0.884302	6.60488	7	7	40.4754	4.18503	3.4453	10.5842	10	7
	cc023c28e5d05e9eece500b92ed0243b74cc5d96ea56cba472bc04149d7c0911	37	21.094	11.4094	1	1	13.9215	3.96817	48.8727	b460d31b-dcb5-45fd-abb1-345891abf943	3	3	0.712809	0.702431	9.25683	7	7	90.9072	37.3185	17.585	8.61092	10	7
	cc023c28e5d05e9eece500b92ed0243b74cc5d96ea56cba472bc04149d7c0911	38	2.73479	9.19542	1	1	13.933	5.81054	42.7636	abf1707a-1d41-425f-971c-791341cb2b47	3	3	0.518166	1.53995	7.31104	7	7	50.4319	11.1329	8.21302	8.61279	10	7
	cc023c28e5d05e9eece500b92ed0243b74cc5d96ea56cba472bc04149d7c0911	39	11.5672	8.58374	1	1	11.7694	3.40129	35.1273	c27cbd14-4f75-4cdb-91e1-492e5e5e1eff	3	3	0.649935	0.371473	7.88308	7	7	19.2637	3.58835	3.33366	10.0234	10	7
	cc023c28e5d05e9eece500b92ed0243b74cc5d96ea56cba472bc04149d7c0911	40	16.4558	9.51376	1	1	15.2111	3.40129	36.6545	c2d28f87-9751-4352-a474-17bf30118b5b	3	3	0.836101	0.488111	7.18641	7	7	11.6881	2.52784	4.47931	11.2888	10	7
	cc023c28e5d05e9eece500b92ed0243b74cc5d96ea56cba472bc04149d7c0911	41	8.33837	9.02778	1	1	13.5958	3.54301	47.3455	8e9d7aa7-8029-42af-925d-cc906cc8dee4	3	3	0.928557	0.96152	4.91651	7	7	22.2939	2.36812	5.9319	8.24539	10	7
	cc023c28e5d05e9eece500b92ed0243b74cc5d96ea56cba472bc04149d7c0911	42	13.0424	7.79154	1	1	14.4865	3.68473	42.7636	aeda81a8-e4a1-44b7-b0c9-58c33e0aa0a9	3	3	1.66733	0.533892	5.43861	7	7	40.2589	3.29088	11.896	6.44093	10	7
	cc023c28e5d05e9eece500b92ed0243b74cc5d96ea56cba472bc04149d7c0911	43	8.88457	9.34166	1	1	14.386	3.68473	36.6545	351912d5-0e5f-46c1-9de2-89929ff781d0	3	3	0.496745	0.507655	6.12989	7	7	9.74006	2.22878	3.91911	7.90155	10	7
	cc023c28e5d05e9eece500b92ed0243b74cc5d96ea56cba472bc04149d7c0911	44	19.4452	12.0953	1	1	13.5452	4.96022	51.9273	c8034802-0252-4798-be46-c983e49b824e	3	3	0.926549	1.81359	10.6068	7	7	151.296	6.51701	17.3575	12.3847	10	7
	cc023c28e5d05e9eece500b92ed0243b74cc5d96ea56cba472bc04149d7c0911	45	10.8123	9.66693	1	1	13.4112	5.66882	53.4545	7962ca14-73ea-432b-935b-4af965942c16	3	3	0.356766	2.09073	5.65933	7	7	61.2542	4.55076	13.3529	6.44708	10	7
	cc023c28e5d05e9eece500b92ed0243b74cc5d96ea56cba472bc04149d7c0911	46	14.3057	10.2339	1	1	14.5255	6.66086	48.8727	4ff39cc7-9dcb-4e53-8202-919d3a9fd18a	3	3	0.365204	2.65509	7.42969	7	7	66.016	2.96023	7.52077	10.2155	10	7
	cc023c28e5d05e9eece500b92ed0243b74cc5d96ea56cba472bc04149d7c0911	47	20.871	9.01195	1	1	15.525	3.96817	51.9273	66f2a579-068b-4a6a-9a5b-a2608c7b7a77	3	3	0.363673	0.954277	6.76064	7	7	23.809	2.60478	5.91203	7.00046	10	7
	cc023c28e5d05e9eece500b92ed0243b74cc5d96ea56cba472bc04149d7c0911	48	2.36669	9.04522	1	1	14.9255	5.24366	36.6545	01893dbd-6ca7-4de4-a2ec-ea9ca9b26a33	3	3	0.334348	2.33933	6.26052	7	7	36.3629	3.76797	5.28062	7.56008	10	7
	cc023c28e5d05e9eece500b92ed0243b74cc5d96ea56cba472bc04149d7c0911	49	24.192	8.81644	1	1	13.3777	5.38538	35.1273	f753e952-31a7-4a3d-9440-277001fdc6e6	3	3	1.59906	0.736148	7.0263	7	7	55.843	21.2717	4.91995	8.23261	10	7
	cc023c28e5d05e9eece500b92ed0243b74cc5d96ea56cba472bc04149d7c0911	50	19.5878	11.1209	1	1	14.3541	5.24366	50.4	50f82f32-9d9d-440d-8fae-c01e56f1aca4	3	3	0.648709	0.537939	7.84605	7	7	31.1682	2.83853	5.5439	9.84929	10	7
	cc023c28e5d05e9eece500b92ed0243b74cc5d96ea56cba472bc04149d7c0911	51	15.1957	8.09637	1	1	13.4617	3.82645	39.7091	8088b6c8-6bb1-47ea-ad57-6b9b325cd4d1	3	3	0.36058	0.834859	7.3764	7	7	16.6663	2.54767	5.81096	8.90456	10	7
	cc023c28e5d05e9eece500b92ed0243b74cc5d96ea56cba472bc04149d7c0911	52	18.1962	9.02987	1	1	13.6786	3.96817	35.1273	3c7a5956-c13f-4095-859e-26622d4d67be	3	3	0.322812	0.397357	9.28037	7	7	14.5019	3.1282	4.20096	10.1175	10	7
	cc023c28e5d05e9eece500b92ed0243b74cc5d96ea56cba472bc04149d7c0911	53	9.91221	10.4256	1	1	13.2008	4.25161	35.1273	5e0a81b5-9ce6-484f-ad11-e080d2230833	3	3	0.416229	0.421518	12.1083	7	7	21.861	5.96002	4.19565	10.0741	10	7
	cc023c28e5d05e9eece500b92ed0243b74cc5d96ea56cba472bc04149d7c0911	54	5.44387	11.4287	1	1	13.7126	4.25161	35.1273	c95b76fd-62df-4bf2-8b25-2f3dbc0f955f	3	3	0.567931	1.07804	10.3892	7	7	40.9083	6.92323	4.55448	9.79233	10	7
	cc023c28e5d05e9eece500b92ed0243b74cc5d96ea56cba472bc04149d7c0911	55	11.9743	8.6912	1	1	15.1738	3.82645	38.1818	88db1908-8033-4189-a1d8-6fbf598a710a	3	3	1.89623	0.973123	6.51787	7	7	22.7268	2.75068	5.05398	7.49797	10	7
	cc023c28e5d05e9eece500b92ed0243b74cc5d96ea56cba472bc04149d7c0911	56	5.85616	10.5755	1	1	14.3869	4.53505	45.8182	441457c9-bb95-4f2c-ad76-5841ae0e7dcf	3	3	0.960233	0.574564	8.25814	7	7	49.999	4.26417	12.8634	8.6107	10	7
	cc023c28e5d05e9eece500b92ed0243b74cc5d96ea56cba472bc04149d7c0911	57	8.78502	9.1861	1	1	14.4209	4.25161	48.8727	c73766ea-63b4-4c80-8fa9-07404647ae69	3	3	0.450919	0.581572	6.99313	7	7	34.1984	5.37719	23.1966	6.73314	10	7
	cc023c28e5d05e9eece500b92ed0243b74cc5d96ea56cba472bc04149d7c0911	58	14.691	8.99011	1	1	16.0173	4.53505	65.6727	8606bb33-35b3-4002-b4cb-51a36f77159e	3	3	0.620757	1.05881	5.76986	7	7	101.513	23.4651	32.0123	6.11246	10	7
	cc023c28e5d05e9eece500b92ed0243b74cc5d96ea56cba472bc04149d7c0911	59	17.5261	8.869	1	1	15.868	4.39333	36.6545	1a9c3a18-1c4c-46c7-96b7-a69270476ade	3	3	0.441285	1.01491	8.61527	7	7	26.8393	3.17305	6.2172	8.2123	10	7
	097dfc80530ce824b9fb4c7696399b13010391c35c639d2fcd5b12bda223baca	1	12.6964	8.69896	1	1	11.1408	4.45283	35.1273	cb0ef73d-531a-4497-ad18-20d93f22778a	3	3	0.310498	0.948048	8.86488	7	7	21.0396	3.94864	4.3994	8.8016	10	7
	097dfc80530ce824b9fb4c7696399b13010391c35c639d2fcd5b12bda223baca	2	6.62445	7.20759	1	1	8.71354	4.73113	50.4	1aacddf1-45e9-455d-ae73-025470b6d5ad	3	3	0.39247	0.766744	5.67316	7	7	31.8782	4.08777	13.7608	5.0022	10	7
	097dfc80530ce824b9fb4c7696399b13010391c35c639d2fcd5b12bda223baca	3	2.70019	11.5718	1	1	10.0779	5.00943	36.6545	4b9df83a-40ce-4f13-b47b-8a85c15a8615	3	3	0.474245	1.48023	11.3919	7	7	65.6691	12.6592	6.66889	10.5917	10	7
	097dfc80530ce824b9fb4c7696399b13010391c35c639d2fcd5b12bda223baca	4	6.15709	9.71919	1	1	9.04505	3.89622	35.1273	497a9a98-bc24-4655-b81f-259bc93b39a5	3	3	1.63902	0.481429	8.33943	7	7	62.6938	21.4573	4.20988	9.15819	10	7
	097dfc80530ce824b9fb4c7696399b13010391c35c639d2fcd5b12bda223baca	5	6.7908	12.3164	1	1	9.99442	5.14858	45.8182	531afb34-ebdc-43a6-8158-a47004edd33b	3	3	0.47841	1.85012	10.7374	7	7	97.1223	15.0555	5.39041	11.1175	10	7
	097dfc80530ce824b9fb4c7696399b13010391c35c639d2fcd5b12bda223baca	6	11.3656	7.01301	1	1	8.87833	6.81839	53.4545	a01ffde4-9278-4b43-9b21-a0e99aa13597	3	3	0.410455	0.850946	6.52674	7	7	65.6691	7.71435	11.2369	6.38955	10	7
	097dfc80530ce824b9fb4c7696399b13010391c35c639d2fcd5b12bda223baca	7	29.8863	13.1489	1	1	9.99651	5.14858	36.6545	44cce163-76eb-43e5-a832-8ff48989ac30	3	3	0.454061	1.27436	10.5417	7	7	93.5094	6.82653	5.50064	11.1798	10	7
	097dfc80530ce824b9fb4c7696399b13010391c35c639d2fcd5b12bda223baca	8	19.6028	11.9861	1	1	9.92603	4.59198	36.6545	c05974ce-f750-4097-b8c3-58c5f0130ce1	3	3	1.00251	1.14146	10.2473	7	7	78.8454	7.80532	5.17502	11.8532	10	7
	097dfc80530ce824b9fb4c7696399b13010391c35c639d2fcd5b12bda223baca	9	14.2067	11.6098	1	1	9.93988	4.59198	38.1818	78e49663-8a5a-4daa-ba95-0b52b4e0ba20	3	3	1.13458	0.721564	12.0418	7	7	87.1337	7.65325	5.424	13.293	10	7
	097dfc80530ce824b9fb4c7696399b13010391c35c639d2fcd5b12bda223baca	10	0.828399	11.1678	1	1	9.90908	5.00943	38.1818	bbd0b1a7-d250-4511-b984-c54ac9f02c2d	3	3	0.464783	1.59007	10.6614	7	7	58.6559	14.923	6.14867	10.4823	10	7
	097dfc80530ce824b9fb4c7696399b13010391c35c639d2fcd5b12bda223baca	11	19.6086	14.6868	1	1	9.92177	4.59198	38.1818	762424fd-09e7-416d-88b5-92f44d99bd3e	3	3	1.11535	0.517325	12.9138	7	7	78.2079	22.1253	6.06462	12.3835	10	7
	097dfc80530ce824b9fb4c7696399b13010391c35c639d2fcd5b12bda223baca	12	23.9614	11.0622	1	1	9.98223	5.14858	35.1273	7a2aacd7-9ea3-4ff1-8e98-ce6407347e51	3	3	0.927784	1.97245	9.6868	7	7	103.923	14.5438	4.62978	8.85669	10	7
	097dfc80530ce824b9fb4c7696399b13010391c35c639d2fcd5b12bda223baca	13	36.9161	12.0457	1	1	9.9573	4.73113	38.1818	e6eb7082-5840-4371-87db-2b939f1feedf	3	3	0.550953	0.861282	12.7081	7	7	73.5324	15.3722	5.09559	14.1327	10	7
	097dfc80530ce824b9fb4c7696399b13010391c35c639d2fcd5b12bda223baca	14	11.148	6.84667	1	1	8.62357	5.56604	61.0909	c220d01f-1a4a-4b76-9c2c-c4a74052e75e	3	3	0.44893	0.673522	6.98968	7	7	87.9838	32.9559	21.3469	6.19895	10	7
	097dfc80530ce824b9fb4c7696399b13010391c35c639d2fcd5b12bda223baca	15	12.6651	9.46488	1	1	11.0953	5.84434	79.4182	2bb5b6f8-c010-4d97-8b18-d54e74029e6a	3	3	0.539533	2.2588	7.05188	7	7	95.2096	15.4294	24.3549	7.12133	10	7
	097dfc80530ce824b9fb4c7696399b13010391c35c639d2fcd5b12bda223baca	16	14.1778	10.3226	1	1	11.2056	5.56604	45.8182	87659dde-3b79-420c-97e2-e653636401cd	3	3	0.463809	0.798733	8.47695	7	7	64.1814	4.76589	5.72706	10.137	10	7
	097dfc80530ce824b9fb4c7696399b13010391c35c639d2fcd5b12bda223baca	17	4.95932	7.5207	1	1	11.7811	3.75707	35.1273	9b0e423c-effe-47c4-9023-4830cac85f38	3	3	1.4788	0.958282	5.62643	7	7	20.6146	6.62703	32.4482	5.15986	10	7
	097dfc80530ce824b9fb4c7696399b13010391c35c639d2fcd5b12bda223baca	18	8.46828	7.52718	1	1	10.9807	5.00943	36.6545	48a26a6f-6415-4f6b-8703-b357d6eb77d3	3	3	0.616239	2.1446	5.47057	7	7	30.8156	3.80915	4.54463	7.49417	10	7
	097dfc80530ce824b9fb4c7696399b13010391c35c639d2fcd5b12bda223baca	19	11.2798	7.65084	1	1	11.3635	3.47877	36.6545	c3c39b74-4067-472f-96bf-0b4ccd16b16e	3	3	0.325987	0.394677	7.49126	7	7	9.9885	13.3457	4.58937	6.55569	10	7
	097dfc80530ce824b9fb4c7696399b13010391c35c639d2fcd5b12bda223baca	20	9.09236	12.62	1	1	10.5793	5.70519	45.8182	8518453b-5f2c-4654-a466-c0556b18601f	3	3	0.553758	1.46482	11.0986	7	7	112.424	15.3442	6.04272	12.351	10	7
	097dfc80530ce824b9fb4c7696399b13010391c35c639d2fcd5b12bda223baca	21	34.6397	18.7127	1	1	9.51844	5.42688	38.1818	d42c0438-fb64-4f94-a341-432005ba67cd	3	3	1.12032	1.20454	14.6045	7	7	141.539	10.2047	4.35701	17.7515	10	7
	097dfc80530ce824b9fb4c7696399b13010391c35c639d2fcd5b12bda223baca	22	12.0711	11.4282	1	1	9.20785	4.73113	41.2364	756bb16b-c575-412a-b3b3-9400c5afd3a6	3	3	0.998708	1.39946	9.93767	7	7	78.4204	4.69129	10.1518	11.0233	10	7
	097dfc80530ce824b9fb4c7696399b13010391c35c639d2fcd5b12bda223baca	23	15.354	15.9442	1	1	9.52661	6.26179	41.2364	40cfe93c-4d34-4415-b46f-c24bd8926097	3	3	1.03427	0.970199	16.0175	7	7	154.29	6.75352	5.71309	17.8873	10	7
	097dfc80530ce824b9fb4c7696399b13010391c35c639d2fcd5b12bda223baca	24	17.7763	17.2763	1	1	9.48512	5.42688	36.6545	7d4d1426-9399-4bea-805a-6afc9b0ab473	3	3	0.574688	1.44197	14.3013	7	7	100.735	5.15521	4.01753	17.2396	10	7
	097dfc80530ce824b9fb4c7696399b13010391c35c639d2fcd5b12bda223baca	25	10.8655	9.95736	1	1	9.86475	4.31368	47.3455	57a1fc61-2804-45aa-a434-a2c235d17719	3	3	0.491975	2.35734	7.50343	7	7	42.9293	14.348	15.6721	6.53619	10	7
	097dfc80530ce824b9fb4c7696399b13010391c35c639d2fcd5b12bda223baca	26	10.4536	9.20426	1	1	10.5428	5.00943	39.7091	2166ea86-e6f5-42a2-92ad-5f12373fbbb6	3	3	0.51434	1.97199	6.20791	7	7	60.1435	17.6479	7.68941	6.31222	10	7
	097dfc80530ce824b9fb4c7696399b13010391c35c639d2fcd5b12bda223baca	27	19.917	15.6737	1	1	11.1181	5.00943	41.2364	2b38b025-11ba-4567-bbe2-106597c78d64	3	3	0.48482	1.85781	13.9518	7	7	73.9574	5.62169	6.7304	15.2961	10	7
	097dfc80530ce824b9fb4c7696399b13010391c35c639d2fcd5b12bda223baca	28	6.5249	12.9357	1	1	10.8563	4.31368	35.1273	fff1bb47-be5a-4236-aa8e-3db717546330	3	3	0.584946	0.522566	13.6037	7	7	51.4302	15.1238	4.03203	12.3663	10	7
	097dfc80530ce824b9fb4c7696399b13010391c35c639d2fcd5b12bda223baca	29	35.875	19.5287	1	1	11.6971	5.28773	38.1818	e017eb1f-8649-446f-8dc4-51361f82ccae	3	3	0.512016	1.29103	16.5654	7	7	153.228	22.4303	4.24583	18.572	10	7
	097dfc80530ce824b9fb4c7696399b13010391c35c639d2fcd5b12bda223baca	30	14.6503	13.1937	1	1	9.1194	4.87028	38.1818	f0053ff3-0ae5-4ee3-bf9d-360346c43f9f	3	3	0.780613	1.15335	10.8977	7	7	82.0332	7.21851	7.41485	12.163	10	7
	097dfc80530ce824b9fb4c7696399b13010391c35c639d2fcd5b12bda223baca	31	10.183	8.83998	1	1	9.42734	4.03538	39.7091	ca641bdf-d763-4c67-a87b-effcc2ad07e0	3	3	1.68299	0.555794	6.95204	7	7	47.3923	11.7007	5.49189	8.14205	10	7
	097dfc80530ce824b9fb4c7696399b13010391c35c639d2fcd5b12bda223baca	32	10.4862	9.03154	1	1	12.1486	3.75707	42.7636	99058e79-8a20-4a34-8084-989111507b66	3	3	0.390875	0.363254	8.11538	7	7	19.3394	7.04586	11.1748	6.78731	10	7
	097dfc80530ce824b9fb4c7696399b13010391c35c639d2fcd5b12bda223baca	33	11.5782	7.57978	1	1	12.1615	3.75707	36.6545	d9db495d-5c2b-4c5d-8f65-6b62b38c431c	3	3	0.627441	0.825981	5.26406	7	7	16.1516	2.78992	5.17397	7.5104	10	7
	097dfc80530ce824b9fb4c7696399b13010391c35c639d2fcd5b12bda223baca	34	-1.49332	7.63547	1	1	12.6935	4.03538	38.1818	4f1d4d72-2638-4942-bfcb-e33fe5e5c9d3	3	3	0.529485	0.988873	7.00466	7	7	19.1269	5.4286	5.68909	7.1781	10	7
	097dfc80530ce824b9fb4c7696399b13010391c35c639d2fcd5b12bda223baca	35	12.4216	12.4413	1	1	10.6811	6.95754	70.2545	b5591c24-6bf8-46e1-936b-ce6c065dc729	3	3	0.793063	0.968519	8.37012	7	7	265.439	74.2564	36.7781	7.56732	10	7
	097dfc80530ce824b9fb4c7696399b13010391c35c639d2fcd5b12bda223baca	36	8.78126	17.2247	1	1	11.0558	4.31368	35.1273	541bf2c2-3014-4b38-900b-69f8c1374bed	3	3	0.810534	0.64075	16.1994	7	7	76.9327	10.7653	4.63155	16.182	10	7
	097dfc80530ce824b9fb4c7696399b13010391c35c639d2fcd5b12bda223baca	37	20.2912	20.4349	1	1	10.9574	6.54009	42.7636	568832e5-5c4b-47f2-b8cf-efa396f842b9	3	3	0.640063	1.27295	15.2967	7	7	107.111	5.83506	11.1309	16.6899	10	7
	097dfc80530ce824b9fb4c7696399b13010391c35c639d2fcd5b12bda223baca	38	13.775	17.1171	1	1	10.9882	5.28773	39.7091	c2b774fa-d6cd-4f7e-913d-75e24893784d	3	3	1.04213	1.35002	13.217	7	7	109.023	8.06238	7.66275	15.506	10	7
	097dfc80530ce824b9fb4c7696399b13010391c35c639d2fcd5b12bda223baca	39	3.37089	18.5496	1	1	10.8617	5.42688	39.7091	7c3d3809-673f-4ae8-af46-21ae2d81e913	3	3	0.574767	0.724325	18.6949	7	7	100.948	8.26508	6.80763	17.6841	10	7
	097dfc80530ce824b9fb4c7696399b13010391c35c639d2fcd5b12bda223baca	40	10.1275	20.0802	1	1	11.0398	4.45283	41.2364	9e528e5a-a5ad-4b50-97d1-621ea2e84674	3	3	0.711527	1.05104	17.225	7	7	78.8454	5.16754	6.06619	20.2363	10	7
	097dfc80530ce824b9fb4c7696399b13010391c35c639d2fcd5b12bda223baca	41	5.89094	17.9765	1	1	11.1979	5.28773	39.7091	ef22a3e9-81df-49c8-ac29-c6297cb8446b	3	3	0.625611	1.40845	13.0267	7	7	76.7202	4.76148	8.43237	15.163	10	7
	097dfc80530ce824b9fb4c7696399b13010391c35c639d2fcd5b12bda223baca	42	22.7202	17.667	1	1	11.2541	5.28773	36.6545	0711661d-b2da-4bd4-8df2-d82339181e0c	3	3	0.577265	1.35671	14.7749	7	7	87.5588	9.27889	5.20647	15.6994	10	7
	097dfc80530ce824b9fb4c7696399b13010391c35c639d2fcd5b12bda223baca	43	19.0663	17.1233	1	1	11.2951	5.00943	39.7091	8e6c39b0-a8cc-43f9-a2b6-628480651dea	3	3	0.702957	1.31022	13.3224	7	7	90.5341	4.50242	7.45379	16.3762	10	7
	097dfc80530ce824b9fb4c7696399b13010391c35c639d2fcd5b12bda223baca	44	18.0014	13.6593	1	1	11.4327	5.14858	38.1818	c860edbc-a8d0-43ae-8c1d-1b4861e27cf0	3	3	0.496093	1.4849	12.2439	7	7	81.8207	10.4077	7.36726	12.8849	10	7
	097dfc80530ce824b9fb4c7696399b13010391c35c639d2fcd5b12bda223baca	45	3.63289	12.5917	1	1	11.505	5.42688	38.1818	e39bb475-a205-4a34-84be-5bef8b02affd	3	3	0.404616	1.65836	11.4655	7	7	68.4319	17.1879	5.89399	11.4787	10	7
	097dfc80530ce824b9fb4c7696399b13010391c35c639d2fcd5b12bda223baca	46	3.0609	16.1347	1	1	11.5205	5.56604	41.2364	a439f1fa-4b12-40fe-b266-58fa6666e1a5	3	3	0.660214	0.64684	15.6718	7	7	88.6214	7.28242	10.0903	15.859	10	7
	097dfc80530ce824b9fb4c7696399b13010391c35c639d2fcd5b12bda223baca	47	26.1625	17.0996	1	1	11.4793	5.42688	41.2364	951feae9-e44d-4d30-9773-6473ab04d6c0	3	3	0.930051	1.34008	15.7935	7	7	104.348	7.83704	10.4403	14.579	10	7
	097dfc80530ce824b9fb4c7696399b13010391c35c639d2fcd5b12bda223baca	48	18.3625	14.6721	1	1	11.4246	5.70519	44.2909	2980a13c-1026-4990-8f15-2aaa46f3ad08	3	3	0.931887	1.13986	12.9366	7	7	106.473	11.1355	10.8456	13.125	10	7
	097dfc80530ce824b9fb4c7696399b13010391c35c639d2fcd5b12bda223baca	49	25.0148	18.817	1	1	11.3746	5.70519	38.1818	8a99197c-6bca-4eba-98ed-800c6539df45	3	3	0.534968	0.970508	17.0389	7	7	123.9	11.1492	5.215	16.1807	10	7
	097dfc80530ce824b9fb4c7696399b13010391c35c639d2fcd5b12bda223baca	50	13.0581	15.8092	1	1	11.3814	5.28773	44.2909	80850c7d-3a7f-485f-920a-d6ef3b6acfe5	3	3	0.670639	0.510763	17.2604	7	7	73.9574	8.19779	6.83964	17.3604	10	7
	097dfc80530ce824b9fb4c7696399b13010391c35c639d2fcd5b12bda223baca	51	13.1677	15.92	1	1	11.3635	5.70519	39.7091	82b8b818-0f66-4b06-9356-cd843612b04b	3	3	0.722044	0.587229	15.5725	7	7	69.0694	5.80932	8.66631	16.2705	10	7
	097dfc80530ce824b9fb4c7696399b13010391c35c639d2fcd5b12bda223baca	52	13.8095	10.4899	1	1	11.2125	5.28773	36.6545	5f8eda5e-2e3b-45e8-89a6-2b1af23ade21	3	3	0.611258	0.584481	9.4311	7	7	244.612	129.603	5.21813	8.50685	10	7
	097dfc80530ce824b9fb4c7696399b13010391c35c639d2fcd5b12bda223baca	53	13.8034	10.441	1	1	11.206	4.87028	47.3455	53286b3d-f418-40f2-a43e-fd621bbd3f96	3	3	0.401362	0.736681	10.678	7	7	46.5422	8.1907	8.43438	9.20809	10	7
	097dfc80530ce824b9fb4c7696399b13010391c35c639d2fcd5b12bda223baca	54	1.18073	9.14298	1	1	11.2785	7.6533	68.7273	d35a51fd-915c-467f-97f6-4032985f877a	3	3	1.77244	1.15906	7.17729	7	7	197.857	52.1141	19.1573	7.94132	10	7
	097dfc80530ce824b9fb4c7696399b13010391c35c639d2fcd5b12bda223baca	55	12.0477	8.32898	1	1	11.8087	4.73113	41.2364	f39a95d5-f65b-4df6-9a69-14af41bad3d4	3	3	0.539624	1.81788	6.22531	7	7	40.5916	11.6655	12.1225	5.69274	10	7
	097dfc80530ce824b9fb4c7696399b13010391c35c639d2fcd5b12bda223baca	56	11.8427	9.83931	1	1	11.7457	5.42688	88.5818	1b7716d0-0914-474e-aaf2-ccccf50f5e62	3	3	0.527327	1.89927	7.57508	7	7	223.997	5.8892	50.5583	8.13488	10	7
	097dfc80530ce824b9fb4c7696399b13010391c35c639d2fcd5b12bda223baca	57	15.9813	13.5	1	1	11.9764	4.03538	38.1818	7c8869e6-f63a-48a7-839f-4a58ff3f560f	3	3	0.394445	1.05196	8.8587	7	7	29.9655	3.63354	7.03535	10.1653	10	7
	097dfc80530ce824b9fb4c7696399b13010391c35c639d2fcd5b12bda223baca	58	21.3207	14.3041	1	1	12.0604	6.26179	45.8182	bf6a85c8-5156-472d-948e-c144e1c8e737	3	3	1.38287	1.1515	12.7774	7	7	199.983	18.8592	10.0735	13.4182	10	7
	097dfc80530ce824b9fb4c7696399b13010391c35c639d2fcd5b12bda223baca	59	2.53391	9.3223	1	1	11.8903	5.28773	36.6545	aff2338e-e891-4721-856f-62ec2e46d951	3	3	0.976407	0.534277	6.66836	7	7	45.4796	17.5559	21.9939	5.71857	10	7
	097dfc80530ce824b9fb4c7696399b13010391c35c639d2fcd5b12bda223baca	60	14.1054	9.19526	1	1	12.1827	3.61792	33.6	73601ab2-77c2-43d5-b3b9-ce0c898d7d45	3	3	0.436351	0.672748	7.58791	7	7	11.6887	4.44434	3.21669	8.13187	10	7
	097dfc80530ce824b9fb4c7696399b13010391c35c639d2fcd5b12bda223baca	61	10.1434	7.89944	1	1	12.1229	3.89622	33.6	81d4a6bf-cc26-4b63-9ba5-f5a4e851b5a6	3	3	4.36837	0.88629	5.32471	7	7	24.2274	3.09533	4.49373	7.70496	10	7
	097dfc80530ce824b9fb4c7696399b13010391c35c639d2fcd5b12bda223baca	62	10.9943	7.48806	1	1	12.1485	3.75707	38.1818	916e23a9-aeab-409d-84d0-7c1c8bbd768b	3	3	1.86586	1.08945	5.66151	7	7	14.8765	2.84491	5.12749	7.89091	10	7
	097dfc80530ce824b9fb4c7696399b13010391c35c639d2fcd5b12bda223baca	63	30.7143	9.47172	1	1	12.438	4.03538	33.6	05248482-4d07-410c-b28e-797c8275163d	3	3	0.505729	0.976953	6.96901	7	7	24.865	4.32945	3.34284	8.70881	10	7
	097dfc80530ce824b9fb4c7696399b13010391c35c639d2fcd5b12bda223baca	64	7.17093	8.67738	1	1	12.0282	3.61792	35.1273	a15980be-b706-4bd7-9bd5-048aa500b77b	3	3	0.402853	0.464551	7.73467	7	7	14.2389	3.89303	5.39374	8.374	10	7
	097dfc80530ce824b9fb4c7696399b13010391c35c639d2fcd5b12bda223baca	65	2.24164	8.24796	1	1	12.0229	5.00943	39.7091	6bcabe38-8ea9-4d9f-b662-f4c7afe6908f	3	3	1.04457	1.88813	5.99869	7	7	67.7943	5.40577	3.72037	7.7697	10	7
	097dfc80530ce824b9fb4c7696399b13010391c35c639d2fcd5b12bda223baca	66	8.2625	8.50793	1	1	10.8808	4.73113	41.2364	e14ef68d-ce08-4382-8778-1073b3b5f4a1	3	3	2.30585	1.04913	4.28631	7	7	103.073	58.6171	5.11652	6.14608	10	7
	097dfc80530ce824b9fb4c7696399b13010391c35c639d2fcd5b12bda223baca	67	2.40405	8.55514	1	1	10.7857	4.87028	44.2909	716a1d40-e935-489c-b0f3-a72a4c8bac1e	3	3	0.44815	0.941174	6.75042	7	7	78.6329	7.50163	5.88643	6.90408	10	7
	097dfc80530ce824b9fb4c7696399b13010391c35c639d2fcd5b12bda223baca	68	5.616	10.1653	1	1	10.7732	4.87028	50.4	9897913a-76fb-4772-94b6-2fd116485278	3	3	1.86871	1.87369	7.36751	7	7	106.898	6.22822	15.9841	7.85554	10	7
	097dfc80530ce824b9fb4c7696399b13010391c35c639d2fcd5b12bda223baca	69	10.1884	6.88714	1	1	11.7638	4.17453	42.7636	9d2ed141-2eae-444b-ad6f-7008b29e50d1	3	3	0.98702	2.64823	5.38083	7	7	29.5405	2.70713	10.9196	5.58891	10	7
	097dfc80530ce824b9fb4c7696399b13010391c35c639d2fcd5b12bda223baca	70	14.7231	11.3409	1	1	11.7863	4.59198	36.6545	22b5c28a-5990-43cb-aae3-9dcc3fee2da1	3	3	0.520133	1.01123	9.24419	7	7	86.9212	31.2097	6.96192	8.9997	10	7
	097dfc80530ce824b9fb4c7696399b13010391c35c639d2fcd5b12bda223baca	71	9.61107	12.9763	1	1	11.5439	5.42688	44.2909	efcb841e-aaf3-437b-be09-4fe31ec2b4cc	3	3	1.03827	1.56308	11.6745	7	7	79.2705	3.94969	9.6723	12.7875	10	7
	097dfc80530ce824b9fb4c7696399b13010391c35c639d2fcd5b12bda223baca	72	13.1014	15.1191	1	1	11.5558	4.59198	41.2364	c7d5f7d5-e1f2-49a7-94c0-abe96ee5178a	3	3	0.557315	1.15028	12.1728	7	7	74.3825	5.52023	7.62306	13.5855	10	7
	097dfc80530ce824b9fb4c7696399b13010391c35c639d2fcd5b12bda223baca	73	18.0321	14.3009	1	1	11.6191	4.73113	36.6545	7884c021-9ee8-414e-968c-4afbeae27af1	3	3	0.653679	1.08742	12.7988	7	7	66.7317	13.91	3.64115	13.7761	10	7
	097dfc80530ce824b9fb4c7696399b13010391c35c639d2fcd5b12bda223baca	74	13.9097	12.7842	1	1	11.6451	5.84434	36.6545	bfd2976c-7185-4c10-950a-6564d35a0e46	3	3	0.581619	1.34298	11.2207	7	7	67.7943	7.94913	4.20174	13.1093	10	7
	097dfc80530ce824b9fb4c7696399b13010391c35c639d2fcd5b12bda223baca	75	7.98268	15.8386	1	1	11.6377	5.14858	42.7636	62b75e57-0989-4af2-8f94-f420659527c6	3	3	0.981167	1.28039	12.579	7	7	90.7466	6.34832	8.04793	14.1453	10	7
	097dfc80530ce824b9fb4c7696399b13010391c35c639d2fcd5b12bda223baca	76	13.9587	17.6297	1	1	11.6229	4.87028	38.1818	cde22e1d-6170-4c95-a64c-861b4924a609	3	3	0.678046	1.06818	15.9854	7	7	90.109	8.88069	5.07377	17.8366	10	7
	097dfc80530ce824b9fb4c7696399b13010391c35c639d2fcd5b12bda223baca	77	19.913	16.5521	1	1	11.6474	5.00943	39.7091	a14daf0d-3f1c-4da3-ab6a-d31af376381e	3	3	0.715797	0.837243	15.0528	7	7	130.276	5.77826	5.6407	16.7587	10	7
	097dfc80530ce824b9fb4c7696399b13010391c35c639d2fcd5b12bda223baca	78	11.4098	12.9564	1	1	11.634	5.00943	39.7091	34d6c485-986d-4f23-af89-c1c07b024ea9	3	3	0.64897	1.33165	11.8545	7	7	110.511	9.13738	6.08013	12.572	10	7
	097dfc80530ce824b9fb4c7696399b13010391c35c639d2fcd5b12bda223baca	79	15.2281	14.7596	1	1	12.1984	5.14858	71.7818	f5b4cdb9-1a6d-4f39-a663-2ff5a0a95acf	3	3	1.67295	1.74301	11.8297	7	7	258.426	27.1291	40.1726	12.2944	10	7
	097dfc80530ce824b9fb4c7696399b13010391c35c639d2fcd5b12bda223baca	80	28.7711	17.3419	1	1	11.7893	5.00943	36.6545	d3317714-e7b1-42f9-8dc7-912e71bf812c	3	3	0.600033	1.06306	15.9922	7	7	82.6708	5.35328	4.97502	17.0053	10	7
	097dfc80530ce824b9fb4c7696399b13010391c35c639d2fcd5b12bda223baca	81	16.915	13.8991	1	1	11.9269	4.87028	39.7091	0ad7ec05-634c-4a30-b3ba-b03c7bd65532	3	3	0.691115	1.12305	10.8606	7	7	83.7334	8.79938	9.18956	11.9054	10	7
	097dfc80530ce824b9fb4c7696399b13010391c35c639d2fcd5b12bda223baca	82	10.3916	15.1074	1	1	11.9652	4.31368	42.7636	f8f4e029-838b-4d2b-9f5c-bf46c8ba671c	3	3	1.37147	0.715617	13.6069	7	7	117.312	7.10156	10.5314	14.677	10	7
	097dfc80530ce824b9fb4c7696399b13010391c35c639d2fcd5b12bda223baca	83	9.28983	7.82192	1	1	11.9603	3.47877	38.1818	819179ad-abd8-4372-97e0-ad444a93ea51	3	3	0.377137	0.625563	6.93258	7	7	14.2389	2.80654	6.7491	8.01942	10	7
	097dfc80530ce824b9fb4c7696399b13010391c35c639d2fcd5b12bda223baca	84	17.9314	15.4464	1	1	12.0965	5.28773	33.6	66dddd6d-f353-47cb-a741-d2d0214e3e40	3	3	0.597673	1.04958	12.3107	7	7	90.109	16.3053	2.73237	15.3279	10	7
	097dfc80530ce824b9fb4c7696399b13010391c35c639d2fcd5b12bda223baca	85	11.6043	11.5025	1	1	12.2394	5.00943	42.7636	952bad3e-24bf-416b-856d-98b4a9a21277	3	3	0.976029	1.32726	10.0051	7	7	53.9804	5.38178	10.129	11.3903	10	7
	097dfc80530ce824b9fb4c7696399b13010391c35c639d2fcd5b12bda223baca	86	12.9971	14.33	1	1	12.2919	5.84434	35.1273	c8396b33-262d-4b22-8f78-c92b56ddcfbc	3	3	0.457602	0.627329	11.2633	7	7	73.9574	19.8815	4.26458	13.3795	10	7
	097dfc80530ce824b9fb4c7696399b13010391c35c639d2fcd5b12bda223baca	87	19.1078	15.7056	1	1	12.5833	6.54009	54.9818	a2de32e0-e445-48f2-aa8c-c06f647e4766	3	3	2.23769	1.57168	12.5374	7	7	301.143	20.5505	10.9849	13.0092	10	7
	097dfc80530ce824b9fb4c7696399b13010391c35c639d2fcd5b12bda223baca	88	6.92414	7.39204	1	1	12.5656	4.17453	42.7636	e89e9741-c4ac-4b2f-b722-ee719526bf66	3	3	0.438184	0.823325	7.48301	7	7	15.5141	3.88234	4.63101	7.59757	10	7
	097dfc80530ce824b9fb4c7696399b13010391c35c639d2fcd5b12bda223baca	89	27.3415	9.60973	1	1	12.4259	3.75707	41.2364	69d5c26c-ca5a-478e-ac82-11ec87ff466e	3	3	0.338137	0.43887	10.7794	7	7	15.5141	3.26547	5.32054	10.205	10	7
	097dfc80530ce824b9fb4c7696399b13010391c35c639d2fcd5b12bda223baca	90	3.70986	7.99738	1	1	12.4665	3.47877	35.1273	ea1bd9cd-dfd7-470d-9edf-ca685c463157	3	3	0.339406	0.401495	7.24492	7	7	9.35094	2.959	7.74437	7.16844	10	7
	097dfc80530ce824b9fb4c7696399b13010391c35c639d2fcd5b12bda223baca	91	8.98887	13.5802	1	1	12.4474	5.00943	41.2364	43357f7d-2ce3-4716-907a-5279c802a668	3	3	0.695776	0.521861	12.6638	7	7	79.0579	16.1965	8.47583	11.06	10	7
	097dfc80530ce824b9fb4c7696399b13010391c35c639d2fcd5b12bda223baca	92	3.81005	8.75623	1	1	12.5137	3.89622	38.1818	9e9103a4-d73a-4aed-85cb-b1ffe38122c3	3	3	0.61831	0.835817	7.98867	7	7	34.641	13.1114	4.05751	9.38562	10	7
	097dfc80530ce824b9fb4c7696399b13010391c35c639d2fcd5b12bda223baca	93	10.0312	15.6511	1	1	12.4488	5.00943	38.1818	55e925a6-8bd7-4d24-9883-8a0a1433a4e3	3	3	0.770575	1.27029	10.5147	7	7	57.5933	4.21501	6.57807	13.8192	10	7
	097dfc80530ce824b9fb4c7696399b13010391c35c639d2fcd5b12bda223baca	94	5.85209	12.1039	1	1	12.4485	5.28773	39.7091	8ee1acdb-099c-40de-9429-29f9b79fd670	3	3	0.661869	0.484508	11.3432	7	7	80.1205	16.8371	6.06462	11.4739	10	7
	097dfc80530ce824b9fb4c7696399b13010391c35c639d2fcd5b12bda223baca	95	11.3071	10.8774	1	1	12.3076	5.00943	48.8727	d8e3fcbd-1b05-4717-90e5-067d8746b352	3	3	0.719777	1.44163	8.40932	7	7	113.486	13.1337	15.2314	9.54929	10	7
	097dfc80530ce824b9fb4c7696399b13010391c35c639d2fcd5b12bda223baca	96	15.3288	13.6379	1	1	12.2715	5.98349	80.9455	7d470cb3-86a5-4f87-b929-1c78e03fb7bc	3	3	0.523228	1.44094	10.0772	7	7	172.78	5.20088	40.2388	9.49943	10	7
	097dfc80530ce824b9fb4c7696399b13010391c35c639d2fcd5b12bda223baca	97	13.7699	10.0512	1	1	12.1161	4.59198	53.4545	174b5a85-5e3b-4b06-8667-6cd9dd8d1c18	3	3	0.743322	1.20035	8.54808	7	7	80.1205	4.1257	20.8726	10.6054	10	7
	097dfc80530ce824b9fb4c7696399b13010391c35c639d2fcd5b12bda223baca	98	15.4078	11.7595	1	1	12.0853	5.14858	39.7091	13bbe814-513a-4833-9c21-934ebd72ff9d	3	3	0.764717	1.50923	9.39251	7	7	86.7087	15.0512	9.03085	9.81604	10	7
	097dfc80530ce824b9fb4c7696399b13010391c35c639d2fcd5b12bda223baca	99	21.3893	12.0264	1	1	12.0077	4.87028	42.7636	31e3f3f3-c83e-44a2-911c-538a1a940ad6	3	3	0.895107	1.3797	9.41534	7	7	72.4698	10.2676	10.5175	9.12182	10	7
	097dfc80530ce824b9fb4c7696399b13010391c35c639d2fcd5b12bda223baca	100	2.40201	10.8129	1	1	12.0992	5.28773	42.7636	c18a7795-a075-4dde-8a6b-519e4f33e9e2	3	3	0.492081	1.56466	10.6133	7	7	73.1073	4.30089	6.14003	12.2925	10	7
	097dfc80530ce824b9fb4c7696399b13010391c35c639d2fcd5b12bda223baca	101	15.4009	15.1299	1	1	12.017	4.59198	41.2364	c9fd8ef2-1e05-4049-8ea4-ee68c01b4cb0	3	3	1.11619	1.17896	13.7309	7	7	73.7449	8.30923	4.28653	15.8511	10	7
	097dfc80530ce824b9fb4c7696399b13010391c35c639d2fcd5b12bda223baca	102	13.0088	8.08616	1	1	12.1175	4.31368	39.7091	071de4fa-843b-4836-93da-9985e0dcb183	3	3	0.334922	0.586072	6.09293	7	7	14.0264	2.95811	6.09639	7.22852	10	7
	097dfc80530ce824b9fb4c7696399b13010391c35c639d2fcd5b12bda223baca	103	12.547	11.6053	1	1	12.0141	5.14858	50.4	b603c874-275b-4373-bf90-19a9f1fe4c13	3	3	0.774748	1.86682	10.2212	7	7	58.8684	4.58545	13.7096	10.4575	10	7
	097dfc80530ce824b9fb4c7696399b13010391c35c639d2fcd5b12bda223baca	104	13.1283	9.94011	1	1	12.2769	3.61792	38.1818	73bab69c-e54e-47d5-8b2e-690476d9f217	3	3	1.3345	0.603966	7.63752	7	7	45.4796	16.2673	6.84013	8.85389	10	7
	097dfc80530ce824b9fb4c7696399b13010391c35c639d2fcd5b12bda223baca	105	15.3126	18.0007	1	1	12.7256	5.42688	35.1273	01ea76e4-a33b-4010-bfc3-e552069b3d56	3	3	0.615788	0.875054	14.8373	7	7	221.66	23.0885	3.09982	17.7744	10	7
	097dfc80530ce824b9fb4c7696399b13010391c35c639d2fcd5b12bda223baca	106	15.1602	14.4384	1	1	12.115	4.59198	42.7636	c8d14559-84f0-4be8-ae88-9f10bfb1c8af	3	3	1.06353	1.0893	11.1782	7	7	93.0843	20.5971	10.8891	10.8166	10	7
	9a7a5aae397ea3f5a973d299a2ea9dd33bbd35b1201008ad5e8fec4bb41c0395	1	21.2128	12.6474	1	1	10.1073	4.53085	38.1818	92a79aa0-8573-4b2b-b0cf-1968209929ae	3	3	1.12732	1.32529	12.6166	7	7	73.7396	15.59	7.44688	13.107	10	7
	9a7a5aae397ea3f5a973d299a2ea9dd33bbd35b1201008ad5e8fec4bb41c0395	2	8.57831	7.02001	1	1	8.46231	3.8229	42.7636	233bfcc9-183c-44f1-b28b-879bc01eac9a	3	3	0.734243	0.411064	7.81233	7	7	47.7902	12.8904	9.63994	7.99623	10	7
	9a7a5aae397ea3f5a973d299a2ea9dd33bbd35b1201008ad5e8fec4bb41c0395	3	18.0345	11.7627	1	1	8.69357	4.67244	39.7091	e9ca5373-146f-4522-b784-3a36765097fc	3	3	0.51743	0.61625	12.2304	7	7	69.4147	12.6121	7.32267	11.9618	10	7
	9a7a5aae397ea3f5a973d299a2ea9dd33bbd35b1201008ad5e8fec4bb41c0395	4	9.7783	13.1593	1	1	12.474	3.96449	36.6545	d4fbe155-0dcd-4bb4-8bcf-9ad93dac613a	3	3	1.10681	0.546627	10.7713	7	7	44.5465	10.7834	5.12282	12.8806	10	7
	9a7a5aae397ea3f5a973d299a2ea9dd33bbd35b1201008ad5e8fec4bb41c0395	5	8.78553	8.28801	1	1	8.65771	5.23879	35.1273	973f3b46-1bfb-48e5-bf32-78474be55b97	3	3	0.89276	0.742948	9.35269	7	7	78.7132	23.9402	5.654	8.93635	10	7
	9a7a5aae397ea3f5a973d299a2ea9dd33bbd35b1201008ad5e8fec4bb41c0395	6	13.9153	9.73214	1	1	10.3322	3.39814	33.6	734f79e5-a6d8-4d6a-ac90-11cf9e7dfa1b	3	3	0.295959	0.346142	10.7585	7	7	9.29854	2.49377	2.79623	13.0559	10	7
	9a7a5aae397ea3f5a973d299a2ea9dd33bbd35b1201008ad5e8fec4bb41c0395	7	28.9724	13.251	1	1	11.4823	6.22992	39.7091	53d6761e-c5ed-4bfa-8bf7-345ebfa7a998	3	3	0.490219	0.631183	11.0256	7	7	202.622	61.3649	9.88534	8.52136	10	7
	9a7a5aae397ea3f5a973d299a2ea9dd33bbd35b1201008ad5e8fec4bb41c0395	8	4.54585	8.72357	1	1	10.4623	4.67244	62.6182	2e90c704-a48b-4808-bf44-11038e0209ab	3	3	2.38034	0.579485	7.48061	7	7	176.24	41.0237	21.9257	6.89318	10	7
	9a7a5aae397ea3f5a973d299a2ea9dd33bbd35b1201008ad5e8fec4bb41c0395	9	21.9547	9.40063	1	1	10.4095	3.39814	39.7091	c5f2513d-2695-430c-b2c6-2570e9e3c4cc	3	3	0.309	0.390546	7.69938	7	7	10.596	1.99256	5.58874	8.28046	10	7
	9a7a5aae397ea3f5a973d299a2ea9dd33bbd35b1201008ad5e8fec4bb41c0395	10	7.61298	10.9963	1	1	11.4583	4.67244	53.4545	bd350209-86b2-449b-9616-b51b727e7e2e	3	3	0.572212	1.07966	9.36018	7	7	128.45	34.2176	7.98477	8.88787	10	7
	9a7a5aae397ea3f5a973d299a2ea9dd33bbd35b1201008ad5e8fec4bb41c0395	11	8.47057	8.477	1	1	11.1328	4.10608	62.6182	4cb81d51-5d3f-4cdf-ba2e-2596da86645e	3	3	1.08141	1.025	5.81225	7	7	55.1425	3.57213	13.1525	7.44089	10	7
	9a7a5aae397ea3f5a973d299a2ea9dd33bbd35b1201008ad5e8fec4bb41c0395	12	23.4131	10.8626	1	1	11.1926	5.0972	35.1273	68196195-3d04-4e19-8957-ef8ed36846b4	3	3	0.726468	1.23805	9.07016	7	7	100.986	5.61603	3.6853	11.7811	10	7
	9a7a5aae397ea3f5a973d299a2ea9dd33bbd35b1201008ad5e8fec4bb41c0395	13	5.11416	9.17771	1	1	11.5807	4.67244	42.7636	01d15c26-f1f8-4414-9a57-4fce1649bfed	3	3	1.77219	1.48092	6.53267	7	7	69.8471	19.4458	11.7392	7.64389	10	7
	9a7a5aae397ea3f5a973d299a2ea9dd33bbd35b1201008ad5e8fec4bb41c0395	14	14.5215	9.92526	1	1	11.8331	4.24767	38.1818	2976e521-c531-4e92-bbc1-53ae13e8388f	3	3	0.46359	1.09616	7.44516	7	7	34.8155	4.55659	6.28706	8.76892	10	7
	9a7a5aae397ea3f5a973d299a2ea9dd33bbd35b1201008ad5e8fec4bb41c0395	15	19.9473	9.4043	1	1	13.8861	4.53085	38.1818	cb29b058-b9aa-42e0-bb32-5158f6374178	3	3	0.563572	0.620972	9.67842	7	7	77.8482	7.26093	7.00187	10.2255	10	7
	9a7a5aae397ea3f5a973d299a2ea9dd33bbd35b1201008ad5e8fec4bb41c0395	16	14.3766	12.6684	1	1	12.9011	6.22992	67.2	a2e29af8-d0bb-4f14-acfb-603313f8f3c9	3	3	1.28226	2.66818	8.81626	7	7	300.797	26.3865	33.2869	10.0327	10	7
	9a7a5aae397ea3f5a973d299a2ea9dd33bbd35b1201008ad5e8fec4bb41c0395	17	19.1157	26.2474	1	1	11.744	6.37151	164.945	13ec0314-d7aa-4e66-bba5-f54b9a005e27	3	3	3.62586	1.50269	22.7355	7	7	1625.3	47.6368	18.1887	22.6416	10	7
	9a7a5aae397ea3f5a973d299a2ea9dd33bbd35b1201008ad5e8fec4bb41c0395	18	7.56672	13.2021	1	1	12.0135	6.22992	45.8182	51d8abf8-e6f1-4227-bee3-b47f3ff5a08b	3	3	0.910692	1.29746	12.9569	7	7	109.636	10.4936	9.92338	12.5291	10	7
	9a7a5aae397ea3f5a973d299a2ea9dd33bbd35b1201008ad5e8fec4bb41c0395	19	18.9933	14.77	1	1	12.0145	7.07945	50.4	d412e5b3-6148-4b5e-8202-0571b7e69bae	3	3	0.63682	2.5605	13.4176	7	7	164.13	5.01792	13.0652	14.1718	10	7
	9a7a5aae397ea3f5a973d299a2ea9dd33bbd35b1201008ad5e8fec4bb41c0395	20	9.27219	11.1389	1	1	12.0156	4.95562	64.1455	16e2b4fb-062f-4fe1-a655-e04259a57017	3	3	1.59152	1.36729	8.02184	7	7	201.324	39.5253	32.1641	8.24231	10	7
	9a7a5aae397ea3f5a973d299a2ea9dd33bbd35b1201008ad5e8fec4bb41c0395	21	5.52145	8.90845	1	1	13.9525	3.39814	35.1273	e86fb464-6f00-44f0-bf48-6ea35d73d657	3	3	0.364602	0.457905	8.47545	7	7	9.08229	3.74945	21.7891	8.01135	10	7
	9a7a5aae397ea3f5a973d299a2ea9dd33bbd35b1201008ad5e8fec4bb41c0395	22	6.36978	8.8314	1	1	13.9912	3.8229	33.6	099c9838-ce9e-459b-aa49-d111fef8f025	3	3	0.352176	0.842763	7.65988	7	7	13.1909	3.02095	3.49001	8.78503	10	7
	9a7a5aae397ea3f5a973d299a2ea9dd33bbd35b1201008ad5e8fec4bb41c0395	23	14.0324	14.6487	1	1	12.386	5.23879	41.2364	be9072dd-7f46-45d3-971f-e5a5d69f1589	3	3	0.400786	0.972164	13.6342	7	7	100.338	12.4882	8.50849	12.9948	10	7
	9a7a5aae397ea3f5a973d299a2ea9dd33bbd35b1201008ad5e8fec4bb41c0395	24	6.59557	7.5717	1	1	11.0505	5.0972	36.6545	8714142d-a23f-4516-bfa7-b7c625f62436	3	3	1.94545	1.25582	6.39816	7	7	41.519	4.10886	6.80667	7.84656	10	7
	9a7a5aae397ea3f5a973d299a2ea9dd33bbd35b1201008ad5e8fec4bb41c0395	25	16.8566	18.2011	1	1	12.011	5.23879	38.1818	85c8023d-a194-4ad0-a547-098e2313797e	3	3	0.987219	0.836136	16.6212	7	7	245.438	29.1874	5.60347	16.7053	10	7
	9a7a5aae397ea3f5a973d299a2ea9dd33bbd35b1201008ad5e8fec4bb41c0395	26	1.54137	14.1082	1	1	13.5179	5.66356	76.3636	18c90a8f-c87b-4c2a-a157-6ebc80fcddc0	3	3	0.566335	1.28251	10.1433	7	7	198.08	45.1171	42.1603	9.20134	10	7
	9a7a5aae397ea3f5a973d299a2ea9dd33bbd35b1201008ad5e8fec4bb41c0395	27	7.83809	9.19038	1	1	12.1713	4.10608	41.2364	1d7b3c76-9aea-40ce-8272-b17d10509e03	3	3	0.64303	1.21692	7.15279	7	7	40.6541	11.5515	11.2026	7.453	10	7
	9a7a5aae397ea3f5a973d299a2ea9dd33bbd35b1201008ad5e8fec4bb41c0395	28	11.9251	10.8387	1	1	12.0075	4.38926	42.7636	9d9a4246-2fc1-4e86-bad1-69581995fb89	3	3	1.51957	0.870577	7.05166	7	7	44.7627	3.15063	8.95745	9.5484	10	7
	9a7a5aae397ea3f5a973d299a2ea9dd33bbd35b1201008ad5e8fec4bb41c0395	29	20.8016	11.5896	1	1	13.2529	4.81403	35.1273	fc7edf74-a676-4dbe-a0b6-397b27f865bd	3	3	0.540099	0.896717	9.82785	7	7	41.7353	4.02275	3.56011	12.062	10	7
	9a7a5aae397ea3f5a973d299a2ea9dd33bbd35b1201008ad5e8fec4bb41c0395	30	38.7719	17.925	1	1	11.3742	7.36263	45.8182	a3c5d160-0f33-4043-9280-f838ba427b4c	3	3	0.716108	0.81859	13.9203	7	7	550.776	110.703	7.12913	13.4272	10	7
	9a7a5aae397ea3f5a973d299a2ea9dd33bbd35b1201008ad5e8fec4bb41c0395	31	15.3339	12.7069	1	1	14.6038	5.80515	38.1818	69c3cc38-869d-4ce0-82d5-8fde192d2ea7	3	3	0.724357	0.535724	13.1446	7	7	177.321	36.3543	6.84064	12.6228	10	7
	9a7a5aae397ea3f5a973d299a2ea9dd33bbd35b1201008ad5e8fec4bb41c0395	32	10.082	7.56092	1	1	12.7738	3.68131	48.8727	61a48007-c8d8-401d-86b9-45f46b25e592	3	3	3.34094	0.903871	4.12659	7	7	53.6288	19.6687	17.6188	6.01163	10	7
	9a7a5aae397ea3f5a973d299a2ea9dd33bbd35b1201008ad5e8fec4bb41c0395	33	-2.48056	12.7312	1	1	12.3516	4.53085	64.1455	e7e23643-8146-439e-aa89-e8aeb811be2b	3	3	0.77399	0.648953	12.5662	7	7	130.18	5.96956	27.1186	12.4273	10	7
	9a7a5aae397ea3f5a973d299a2ea9dd33bbd35b1201008ad5e8fec4bb41c0395	34	5.97542	13.0614	1	1	13.7188	4.24767	38.1818	cf274930-2a97-41da-ad0b-a45895df6adf	3	3	0.437572	0.874024	11.2463	7	7	29.8418	4.12717	7.957	10.8549	10	7
	9a7a5aae397ea3f5a973d299a2ea9dd33bbd35b1201008ad5e8fec4bb41c0395	35	17.8629	9.77382	1	1	13.4765	4.53085	35.1273	209a77d4-02ad-4a57-8667-8ed0f09f43bf	3	3	0.699059	0.680988	8.3848	7	7	50.6013	13.0125	5.07733	7.99878	10	7
	9a7a5aae397ea3f5a973d299a2ea9dd33bbd35b1201008ad5e8fec4bb41c0395	36	4.51391	9.41742	1	1	13.299	4.81403	39.7091	364219cf-7cfd-468d-88fd-1b45ef6b6f6d	3	3	0.552851	1.0369	10.0488	7	7	65.9547	9.37047	3.99821	10.5007	10	7
	9a7a5aae397ea3f5a973d299a2ea9dd33bbd35b1201008ad5e8fec4bb41c0395	37	9.18689	8.28713	1	1	12.4466	3.68131	35.1273	b56c4090-e941-414c-9ee6-baa7f84f8b8d	3	3	0.380539	0.507087	7.24371	7	7	8.6498	2.26244	3.34796	10.1289	10	7
	9a7a5aae397ea3f5a973d299a2ea9dd33bbd35b1201008ad5e8fec4bb41c0395	38	25.7649	9.73295	1	1	13.1346	5.38038	44.2909	b223d724-dc81-4c79-b22d-cd945f5cf9ed	3	3	0.486619	1.07529	8.01699	7	7	205.649	71.3576	12.8529	6.17612	10	7
	9a7a5aae397ea3f5a973d299a2ea9dd33bbd35b1201008ad5e8fec4bb41c0395	39	12.135	10.329	1	1	13.7677	5.66356	82.4727	3ca87152-51fa-42f7-bac7-cfce45548696	3	3	0.635855	0.772471	7.07533	7	7	118.502	24.842	35.0755	7.85135	10	7
	9a7a5aae397ea3f5a973d299a2ea9dd33bbd35b1201008ad5e8fec4bb41c0395	40	16.5299	9.76098	1	1	12.5756	4.24767	36.6545	ff9d97f8-3fc1-4eb5-a652-f8c7393fae7c	3	3	0.294547	1.56076	5.81118	7	7	18.3808	2.82525	8.20487	6.50754	10	7
	9a7a5aae397ea3f5a973d299a2ea9dd33bbd35b1201008ad5e8fec4bb41c0395	41	13.9549	10.7064	1	1	12.2576	3.39814	47.3455	f17e09b7-42b4-41d2-87fb-47ee25ffb01e	3	3	0.329575	0.764988	8.073	7	7	19.6783	2.97485	4.93546	10.3947	10	7
	9a7a5aae397ea3f5a973d299a2ea9dd33bbd35b1201008ad5e8fec4bb41c0395	42	16.3677	9.47248	1	1	13.7531	4.67244	35.1273	da002f64-99dc-4a5a-86ae-a42653adfb02	3	3	1.69631	1.40827	6.53043	7	7	35.4642	4.37387	4.83609	10.511	10	7
	9a7a5aae397ea3f5a973d299a2ea9dd33bbd35b1201008ad5e8fec4bb41c0395	43	14.0946	12.7051	1	1	13.6633	6.22992	47.3455	04106ebb-3cd8-423f-9351-5b3c560fab39	3	3	0.727869	0.828741	11.5677	7	7	263.819	63.1724	13.2884	9.9732	10	7
	9a7a5aae397ea3f5a973d299a2ea9dd33bbd35b1201008ad5e8fec4bb41c0395	44	2.52078	8.33502	1	1	11.3489	3.39814	35.1273	8e30e739-beef-4fbc-a3e7-c3df71181a16	3	3	0.370083	0.460198	7.5818	7	7	9.08229	2.27951	3.23047	10.7818	10	7
	9a7a5aae397ea3f5a973d299a2ea9dd33bbd35b1201008ad5e8fec4bb41c0395	45	7.81227	9.42517	1	1	13.7035	4.95562	36.6545	43af3db3-d16a-4684-9da3-adad00361956	3	3	2.2392	1.43956	6.70346	7	7	66.6035	6.04779	4.12563	9.40286	10	7
	9a7a5aae397ea3f5a973d299a2ea9dd33bbd35b1201008ad5e8fec4bb41c0395	46	12.0665	11.2508	1	1	13.1331	4.67244	36.6545	40b88dd2-333a-49f4-950c-7a5d88b16724	3	3	0.356385	1.37662	7.74348	7	7	36.3292	4.56241	3.70429	10.1221	10	7
	9a7a5aae397ea3f5a973d299a2ea9dd33bbd35b1201008ad5e8fec4bb41c0395	47	25.7398	16.5603	1	1	13.3447	4.95562	51.9273	c8795e9b-20b9-4617-a786-53d260d4e948	3	3	0.739779	1.36356	14.6279	7	7	178.186	20.7049	21.5256	13.936	10	7
	9a7a5aae397ea3f5a973d299a2ea9dd33bbd35b1201008ad5e8fec4bb41c0395	48	8.8632	8.75722	1	1	11.0375	4.24767	38.1818	b7ec4c90-c4f0-46d4-9de6-028f13ad436e	3	3	0.416484	1.13062	5.91732	7	7	16.8671	2.47813	4.54979	7.93709	10	7
	9a7a5aae397ea3f5a973d299a2ea9dd33bbd35b1201008ad5e8fec4bb41c0395	49	13.1063	10.5009	1	1	14.2509	4.24767	67.2	9d58047b-3a90-4d05-9f15-9d4120a5ac21	3	3	0.35717	0.474361	8.61957	7	7	51.6826	2.76503	10.335	9.67392	10	7
	9a7a5aae397ea3f5a973d299a2ea9dd33bbd35b1201008ad5e8fec4bb41c0395	50	24.2368	8.43543	1	1	12.0934	6.22992	54.9818	677c60e7-c30e-47a3-bb6d-67d834286f8b	3	3	0.348483	3.46786	7.20608	7	7	73.9558	3.80939	13.3104	5.61999	10	7
	9a7a5aae397ea3f5a973d299a2ea9dd33bbd35b1201008ad5e8fec4bb41c0395	51	-0.568266	8.44188	1	1	14.2088	4.10608	33.6	3ee6b270-0620-4c49-86dc-4086448f5ca1	3	3	0.36353	1.09664	4.57767	7	7	17.5158	3.64818	3.53019	6.63046	10	7
	9a7a5aae397ea3f5a973d299a2ea9dd33bbd35b1201008ad5e8fec4bb41c0395	52	5.51942	9.08987	1	1	14.2935	3.96449	36.6545	a839df2d-cdb4-4ed8-b20a-beaccacecfba	3	3	0.419143	1.10487	6.99129	7	7	14.0559	2.41705	3.92897	10.574	10	7
	9a7a5aae397ea3f5a973d299a2ea9dd33bbd35b1201008ad5e8fec4bb41c0395	53	19.3357	10.8578	1	1	13.1481	5.23879	45.8182	778c96c2-8657-49f7-a686-23b7704a2e39	3	3	1.97043	0.923369	7.87796	7	7	106.609	12.9829	10.2534	7.79422	10	7
	9a7a5aae397ea3f5a973d299a2ea9dd33bbd35b1201008ad5e8fec4bb41c0395	54	0.72031	11.5856	1	1	14.9824	3.96449	58.0364	a0ce414f-f24b-49fd-ac37-79843ef9fcdf	3	3	0.776339	0.927217	9.88515	7	7	160.886	21.9073	24.0762	9.26044	10	7
	9a7a5aae397ea3f5a973d299a2ea9dd33bbd35b1201008ad5e8fec4bb41c0395	55	-5.12035	11.9781	1	1	14.9755	5.0972	80.9455	8933afbc-6cfe-4831-8502-9cade621fbda	3	3	0.824429	0.511331	9.86712	7	7	173.861	7.09228	37.8885	9.22865	10	7
	9a7a5aae397ea3f5a973d299a2ea9dd33bbd35b1201008ad5e8fec4bb41c0395	56	10.0604	10.2063	1	1	15.1796	4.53085	41.2364	13d947ee-aa56-4e71-ba32-6d57c6ebb89d	3	3	1.37021	0.95812	9.2496	7	7	138.181	92.233	10.9893	8.57393	10	7
	9a7a5aae397ea3f5a973d299a2ea9dd33bbd35b1201008ad5e8fec4bb41c0395	57	13.8175	11.0199	1	1	15.2975	3.8229	33.6	20e08680-c15f-406e-bbec-1a1d0814c936	3	3	0.365642	0.469881	11.063	7	7	9.73103	2.9202	4.61959	11.219	10	7
	9a7a5aae397ea3f5a973d299a2ea9dd33bbd35b1201008ad5e8fec4bb41c0395	58	16.6007	9.96864	1	1	14.5144	4.38926	45.8182	bee07130-8e68-4cdf-88ac-5c1e9565d656	3	3	0.71527	1.10722	8.14911	7	7	52.1151	31.1558	12.3181	9.10315	10	7
	9a7a5aae397ea3f5a973d299a2ea9dd33bbd35b1201008ad5e8fec4bb41c0395	59	14.1868	10.9793	1	1	14.9466	4.24767	41.2364	87f18dbd-293d-44a6-99d3-c8cb12f9232f	3	3	1.17617	0.956143	7.99678	7	7	130.396	47.9955	4.9015	9.12384	10	7
	9a7a5aae397ea3f5a973d299a2ea9dd33bbd35b1201008ad5e8fec4bb41c0395	60	12.4007	10.0147	1	1	14.7846	4.53085	45.8182	dca7b60d-b393-4702-bd49-ab6e51557100	3	3	0.297311	0.575334	7.5557	7	7	16.8671	2.52868	7.68947	7.51435	10	7
	9a7a5aae397ea3f5a973d299a2ea9dd33bbd35b1201008ad5e8fec4bb41c0395	61	13.3884	17.8047	1	1	14.79	5.38038	47.3455	7469eeaa-e872-4447-8dd9-090aca3f25ce	3	3	0.8349	1.31951	15.7369	7	7	125.422	20.6458	13.3928	13.7707	10	7
	9a7a5aae397ea3f5a973d299a2ea9dd33bbd35b1201008ad5e8fec4bb41c0395	62	9.18193	9.2675	1	1	15.4555	3.39814	33.6	45561b0d-0e0e-4b92-84de-bb0869473c98	3	3	0.291526	0.758908	5.69639	7	7	8.6498	6.91256	3.72348	6.00902	10	7
	9a7a5aae397ea3f5a973d299a2ea9dd33bbd35b1201008ad5e8fec4bb41c0395	63	0.130217	9.48497	1	1	14.9605	4.24767	41.2364	b7366101-2897-469c-9d06-571a54100b62	3	3	2.67385	1.54291	5.88811	7	7	73.0908	4.42822	5.45696	8.01413	10	7
	9a7a5aae397ea3f5a973d299a2ea9dd33bbd35b1201008ad5e8fec4bb41c0395	64	5.52013	9.91036	1	1	14.4587	3.68131	36.6545	c78bc6ae-0593-4284-9fe7-6a5936ca1718	3	3	0.900081	0.698479	8.41854	7	7	27.2469	8.12612	7.52142	8.46737	10	7
	9a7a5aae397ea3f5a973d299a2ea9dd33bbd35b1201008ad5e8fec4bb41c0395	65	-0.0290934	9.39006	1	1	15.8554	3.8229	36.6545	d1eb1f8b-0b8d-4b1c-86a8-eb7d99e1bdd6	3	3	0.430885	0.389478	6.529	7	7	10.3798	2.00032	4.5484	9.97921	10	7
	9a7a5aae397ea3f5a973d299a2ea9dd33bbd35b1201008ad5e8fec4bb41c0395	66	8.83009	17.6854	1	1	15.5955	5.38038	36.6545	3cc2e2f0-e2c6-43f4-9f4e-ee0abcc55e49	3	3	0.844643	1.12147	16.2654	7	7	189.863	8.48338	4.60826	17.4435	10	7
	9a7a5aae397ea3f5a973d299a2ea9dd33bbd35b1201008ad5e8fec4bb41c0395	67	18.4366	12.7007	1	1	15.6504	5.23879	39.7091	d65c2e53-e163-47ee-8189-b2121ad04982	3	3	0.690822	0.815244	10.9107	7	7	129.747	19.5464	4.48652	11.4995	10	7
	9a7a5aae397ea3f5a973d299a2ea9dd33bbd35b1201008ad5e8fec4bb41c0395	68	-1.16181	8.80131	1	1	15.6818	6.22992	45.8182	ddc92cc1-2099-42ff-9c59-dab804d89a47	3	3	0.513676	1.71951	7.4708	7	7	65.7385	10.0718	12.0905	7.59376	10	7
	9a7a5aae397ea3f5a973d299a2ea9dd33bbd35b1201008ad5e8fec4bb41c0395	69	11.3956	11.0538	1	1	15.3592	4.38926	50.4	bc1108dd-5498-4603-90ea-9422d8405da0	3	3	0.331281	0.486454	7.59439	7	7	39.5728	3.86923	7.01119	8.52397	10	7
	9a7a5aae397ea3f5a973d299a2ea9dd33bbd35b1201008ad5e8fec4bb41c0395	70	6.69113	10.725	1	1	14.6613	3.68131	36.6545	03c652f7-ed71-405c-8e23-d7c4119535d8	3	3	0.305942	0.57025	10.6971	7	7	12.326	3.15898	5.14751	9.91698	10	7
	9a7a5aae397ea3f5a973d299a2ea9dd33bbd35b1201008ad5e8fec4bb41c0395	71	7.50104	18.2306	1	1	17.79	5.23879	135.927	f5851454-b723-44fb-9785-6bf381a33783	3	3	0.500545	1.06167	16.8196	7	7	514.663	440.053	11.5846	10.323	10	7
	9a7a5aae397ea3f5a973d299a2ea9dd33bbd35b1201008ad5e8fec4bb41c0395	72	18.4047	16.4599	1	1	14.3219	6.79627	74.8364	dae02f11-3f25-40d7-b454-be606d31fb09	3	3	0.550559	1.21956	14.4775	7	7	431.625	12.8206	17.3361	12.5324	10	7
	9a7a5aae397ea3f5a973d299a2ea9dd33bbd35b1201008ad5e8fec4bb41c0395	73	2.87258	15.507	1	1	16.1236	5.0972	59.5636	560fd493-8fa9-489d-8809-673d40ba3fa3	3	3	1.60229	0.765421	12.356	7	7	211.704	17.6407	16.1615	13.2431	10	7
	9a7a5aae397ea3f5a973d299a2ea9dd33bbd35b1201008ad5e8fec4bb41c0395	74	8.91952	10.5541	1	1	15.084	4.53085	35.1273	ef821450-95ae-47dc-8ffb-ce6f54fda368	3	3	0.399189	0.47356	9.94843	7	7	39.5728	5.23538	3.98442	10.9918	10	7
	9a7a5aae397ea3f5a973d299a2ea9dd33bbd35b1201008ad5e8fec4bb41c0395	75	11.5848	9.01645	1	1	15.1348	4.10608	47.3455	b6d03f44-9a10-44ef-8b86-e49ea1f9cce3	3	3	0.918802	0.874472	8.63883	7	7	36.9779	6.99699	5.6934	8.82501	10	7
	9a7a5aae397ea3f5a973d299a2ea9dd33bbd35b1201008ad5e8fec4bb41c0395	76	4.6675	11.7302	1	1	15.8098	5.23879	39.7091	85aed01b-5537-42b3-9481-783a87eb01e0	3	3	0.413594	0.602557	10.374	7	7	60.9811	15.2229	9.24241	8.55203	10	7
	9a7a5aae397ea3f5a973d299a2ea9dd33bbd35b1201008ad5e8fec4bb41c0395	77	14.0797	11.0756	1	1	15.9159	6.51309	59.5636	d8b38af9-f9aa-4875-8b5f-c567e48018a4	3	3	0.315787	2.63021	7.15403	7	7	73.5233	2.9838	7.29177	9.80493	10	7
	9a7a5aae397ea3f5a973d299a2ea9dd33bbd35b1201008ad5e8fec4bb41c0395	78	12.3854	14.9978	1	1	17.7767	4.24767	44.2909	9773d530-e487-4c0c-9f62-614770a03f73	3	3	1.46599	0.89462	13.2085	7	7	110.285	21.7075	10.5054	15.3464	10	7
	9a7a5aae397ea3f5a973d299a2ea9dd33bbd35b1201008ad5e8fec4bb41c0395	79	8.601	9.36071	1	1	16.2404	3.39814	36.6545	e881cf05-d9d4-425a-aeff-c0676b1c975c	3	3	1.49813	0.495128	6.41316	7	7	42.1678	18.041	5.33499	7.96592	10	7
	9a7a5aae397ea3f5a973d299a2ea9dd33bbd35b1201008ad5e8fec4bb41c0395	80	12.9327	16.0804	1	1	14.5976	7.36263	313.091	461a9a86-5187-464d-9c53-ae4163a64a83	3	3	1.36671	4.24216	12.3991	7	7	1371.43	23.6872	54.2014	11.9097	10	7
	9a7a5aae397ea3f5a973d299a2ea9dd33bbd35b1201008ad5e8fec4bb41c0395	81	7.65769	10.5679	1	1	18.8294	3.53973	41.2364	de3bcd9b-30a5-49ec-97ed-d07f2af48944	3	3	0.915785	0.759838	9.28882	7	7	18.3808	2.48779	5.87364	12.6233	10	7
	9a7a5aae397ea3f5a973d299a2ea9dd33bbd35b1201008ad5e8fec4bb41c0395	82	13.065	10.3048	1	1	14.6889	4.38926	35.1273	9fd9254f-95af-4fd3-b116-ec232a6366b2	3	3	0.912836	0.858885	7.56764	7	7	19.6783	4.51892	4.31718	8.9917	10	7
	9a7a5aae397ea3f5a973d299a2ea9dd33bbd35b1201008ad5e8fec4bb41c0395	83	1.26921	10.867	1	1	15.0006	4.53085	38.1818	6bd49ab8-8fbf-47a8-b419-cf3e0220901b	3	3	0.326456	0.759057	8.01647	7	7	17.7321	3.02533	6.2893	9.19679	10	7
	9a7a5aae397ea3f5a973d299a2ea9dd33bbd35b1201008ad5e8fec4bb41c0395	84	23.6306	10.3034	1	1	18.7374	4.24767	36.6545	a3e0a393-6941-4332-815c-1be23e6f4c04	3	3	0.565651	0.425902	8.00126	7	7	52.98	6.95518	5.089	8.63478	10	7
	9a7a5aae397ea3f5a973d299a2ea9dd33bbd35b1201008ad5e8fec4bb41c0395	85	28.2137	10.7784	1	1	16.9522	4.10608	42.7636	08ca2969-f415-4842-9443-15a6972e43ef	3	3	0.598868	1.11473	8.17531	7	7	95.3641	57.6913	10.1215	7.05799	10	7
	9a7a5aae397ea3f5a973d299a2ea9dd33bbd35b1201008ad5e8fec4bb41c0395	86	11.3983	9.37116	1	1	15.7145	4.38926	39.7091	b353e754-8bc9-480d-9f0c-9bcfe58c8939	3	3	0.387214	1.0639	7.9519	7	7	29.6256	13.6626	5.68966	8.68626	10	7
	9a7a5aae397ea3f5a973d299a2ea9dd33bbd35b1201008ad5e8fec4bb41c0395	87	-1.31059	10.4742	1	1	15.7372	3.68131	45.8182	942933e6-457d-46af-9d6f-f91d15a74dd9	3	3	0.367833	0.408831	9.30726	7	7	16.6509	2.66533	4.52369	10.9062	10	7
	9a7a5aae397ea3f5a973d299a2ea9dd33bbd35b1201008ad5e8fec4bb41c0395	88	6.85218	11.476	1	1	16.6601	4.24767	36.6545	beb899e6-dcef-40b3-9e0c-ceb560cbe42a	3	3	0.559988	1.48169	7.92752	7	7	19.4621	2.79328	3.98284	11.7753	10	7
	9a7a5aae397ea3f5a973d299a2ea9dd33bbd35b1201008ad5e8fec4bb41c0395	89	1.61106	12.2084	1	1	18.8864	4.81403	45.8182	a7d8cbfd-16a9-4c5f-8a1c-6824067507d1	3	3	0.782997	0.558895	10.1485	7	7	69.6309	4.66943	6.92749	10.9236	10	7
	467afe9dac22dc45adf8f57c98e8cebe32630b9f02d20f3e453e87ce87cb526e	1	29.8601	24.3055	1	1	22.773	6.35572	41.2364	aa1bbabf-c3f5-4ed0-a8ad-97eba9ca3b92	3	3	0.926582	1.80574	23.2568	7	7	183.569	10.1955	6.86851	23.9668	10	7
	467afe9dac22dc45adf8f57c98e8cebe32630b9f02d20f3e453e87ce87cb526e	2	20.8883	15.7578	1	1	23.0083	4.37839	38.1818	e0806a00-b30a-4b78-a31f-0b72bccd1443	3	3	0.435842	1.06906	13.4253	7	7	56.5159	4.93961	4.64881	15.9646	10	7
	467afe9dac22dc45adf8f57c98e8cebe32630b9f02d20f3e453e87ce87cb526e	3	21.2898	19.3889	1	1	23.7662	7.20315	47.3455	d919231a-ccc3-47b9-9739-9445d6b23880	3	3	1.13242	1.96898	18.4571	7	7	209.454	9.68261	8.93011	18.9998	10	7
	467afe9dac22dc45adf8f57c98e8cebe32630b9f02d20f3e453e87ce87cb526e	4	31.5615	15.4978	1	1	20.7412	5.50829	42.7636	595b79ea-a8d4-45b7-a0aa-6a6fdfc740d2	3	3	0.40634	1.80369	11.6197	7	7	151.859	37.0598	5.71708	10.3358	10	7
	467afe9dac22dc45adf8f57c98e8cebe32630b9f02d20f3e453e87ce87cb526e	5	5.56106	14.4212	1	1	20.4337	5.64953	36.6545	c26e03f6-9b71-44d3-b95b-0db09183c152	3	3	0.511852	1.32632	13.3699	7	7	67.9485	14.7185	5.16269	14.0577	10	7
	467afe9dac22dc45adf8f57c98e8cebe32630b9f02d20f3e453e87ce87cb526e	6	45.1655	36.1753	1	1	24.5109	5.22582	47.3455	5d203fb2-8078-4d6c-a6f8-e932ce341e98	3	3	0.707561	0.766671	35.9178	7	7	280.206	10.5953	5.22945	33.8781	10	7
	467afe9dac22dc45adf8f57c98e8cebe32630b9f02d20f3e453e87ce87cb526e	7	8.75524	15.0954	1	1	26.9349	3.53096	38.1818	9ce83ea3-e438-4544-b3b9-11f6e34b3873	3	3	0.428627	0.641952	12.0323	7	7	15.7468	3.28789	5.1485	12.5025	10	7
	467afe9dac22dc45adf8f57c98e8cebe32630b9f02d20f3e453e87ce87cb526e	8	4.55951	11.9498	1	1	23.9413	4.23715	47.3455	90635c56-1761-4a2e-a15d-441e2dfd7269	3	3	1.30932	3.0665	8.26048	7	7	113.247	16.669	6.60589	10.0848	10	7
	467afe9dac22dc45adf8f57c98e8cebe32630b9f02d20f3e453e87ce87cb526e	9	18.6882	20.3654	1	1	27.3074	4.51962	44.2909	c766113b-9e8c-4c86-96b8-e08440238344	3	3	0.509355	1.2256	17.8155	7	7	68.1642	3.9243	9.95239	19.9202	10	7
	467afe9dac22dc45adf8f57c98e8cebe32630b9f02d20f3e453e87ce87cb526e	10	30.3459	28.7942	1	1	27.026	5.50829	61.0909	b42dbfd5-2bec-4fdc-819b-220b6d6855ca	3	3	1.09874	1.15062	23.3986	7	7	208.16	17.8134	10.6376	25.7264	10	7
	467afe9dac22dc45adf8f57c98e8cebe32630b9f02d20f3e453e87ce87cb526e	11	15.6037	12.5496	1	1	25.1138	4.09591	56.5091	5bd842aa-8f8d-4539-9b35-31db1b6c3b8d	3	3	0.360144	0.554622	11.2399	7	7	44.6518	3.63416	15.0525	10.424	10	7
	467afe9dac22dc45adf8f57c98e8cebe32630b9f02d20f3e453e87ce87cb526e	12	17.1039	23.2719	1	1	26.7623	4.8021	35.1273	837a3c25-6f7c-4e76-b832-a590fbf6b9b2	3	3	0.611172	1.29548	18.7547	7	7	77.8711	5	3.34407	25.1828	10	7
	467afe9dac22dc45adf8f57c98e8cebe32630b9f02d20f3e453e87ce87cb526e	13	-0.000886369	14.4742	1	1	24.7286	4.37839	48.8727	9a5fd2d9-3b99-4ffe-9546-dd578d34e462	3	3	1.02812	1.10183	10.0084	7	7	41.8476	5.69183	13.6653	10.3597	10	7
	467afe9dac22dc45adf8f57c98e8cebe32630b9f02d20f3e453e87ce87cb526e	14	29.8194	27.5793	1	1	25.4709	5.50829	44.2909	76e72e33-6817-4432-bbff-951007ea688b	3	3	1.08723	0.732122	21.8956	7	7	172.999	8.58629	11.7537	21.8567	10	7
	467afe9dac22dc45adf8f57c98e8cebe32630b9f02d20f3e453e87ce87cb526e	15	-4.70962	13.8841	1	1	24.7495	3.81343	41.2364	b7a4a527-da19-40f0-bf33-20d579822b4a	3	3	1.13305	0.884948	11.3879	7	7	48.966	6.42225	9.76504	12.5907	10	7
	467afe9dac22dc45adf8f57c98e8cebe32630b9f02d20f3e453e87ce87cb526e	16	19.6983	21.7156	1	1	26.1772	4.51962	38.1818	666e6bad-6f3e-4a18-8aef-0970e3d553d5	3	3	0.506091	1.0272	20.1782	7	7	68.5956	5.9944	6.08636	21.0596	10	7
	467afe9dac22dc45adf8f57c98e8cebe32630b9f02d20f3e453e87ce87cb526e	17	10.2504	19.731	1	1	25.3626	5.64953	41.2364	940a035f-ff54-4441-a0b5-716445bed79e	3	3	1.9877	0.685765	17.154	7	7	174.94	18.7324	10.1424	17.3544	10	7
	467afe9dac22dc45adf8f57c98e8cebe32630b9f02d20f3e453e87ce87cb526e	18	10.3093	11.8949	1	1	26.8102	3.53096	36.6545	6455151f-9606-4365-b7b4-9a8b97415027	3	3	0.302493	0.643317	10.763	7	7	11.864	5.50231	8.73317	7.55945	10	7
	467afe9dac22dc45adf8f57c98e8cebe32630b9f02d20f3e453e87ce87cb526e	19	27.0189	20.6659	1	1	25.6398	5.08458	36.6545	c949aed1-83c8-4f34-90f0-9a1067e540a7	3	3	1.09934	0.99504	17.3041	7	7	72.0469	9.5758	4.97397	19.9435	10	7
	467afe9dac22dc45adf8f57c98e8cebe32630b9f02d20f3e453e87ce87cb526e	20	22.6925	13.0588	1	1	26.2108	5.22582	48.8727	f5f05fb5-a666-46dd-a12c-d57d73d0a5bf	3	3	0.416902	2.00278	9.69385	7	7	44.2204	3.14328	19.1628	11.7021	10	7
	467afe9dac22dc45adf8f57c98e8cebe32630b9f02d20f3e453e87ce87cb526e	21	22.7328	12.8358	1	1	25.83	4.37839	50.4	e34420c8-67e5-44a1-816a-b26fdb848b07	3	3	0.852765	1.15056	8.44077	7	7	57.3787	5.60747	22.9272	7.66095	10	7
	467afe9dac22dc45adf8f57c98e8cebe32630b9f02d20f3e453e87ce87cb526e	22	27.0236	18.089	1	1	27.5004	4.8021	36.6545	b4008927-4f16-4cbf-8a24-4b21df05cc9d	3	3	0.414744	1.42908	16.6138	7	7	62.7714	13.2683	4.63751	15.8855	10	7
	467afe9dac22dc45adf8f57c98e8cebe32630b9f02d20f3e453e87ce87cb526e	23	19.6859	12.7966	1	1	24.0839	4.37839	45.8182	fbe44895-fbe1-46e3-9124-6ed9038492eb	3	3	1.58418	1.73524	11.7375	7	7	63.4186	14.7385	7.21429	11.0158	10	7
	467afe9dac22dc45adf8f57c98e8cebe32630b9f02d20f3e453e87ce87cb526e	24	11.0018	21.0624	1	1	27.1205	5.22582	41.2364	dd4c322f-b570-4e0b-a80d-a8e8400d2ffb	3	3	0.528677	1.21524	18.4869	7	7	162.861	37.1846	9.60739	17.6272	10	7
	467afe9dac22dc45adf8f57c98e8cebe32630b9f02d20f3e453e87ce87cb526e	25	25.8613	14.461	1	1	27.6374	6.21448	44.2909	26c5dc8c-da68-4379-9b7b-b433ec6b9a7b	3	3	0.567875	1.53582	12.2012	7	7	102.893	4.78017	9.61736	13.2547	10	7
	467afe9dac22dc45adf8f57c98e8cebe32630b9f02d20f3e453e87ce87cb526e	26	10.2796	13.4316	1	1	29.9786	3.81343	41.2364	5d38f16b-06ba-4429-a731-08dcf4e6042f	3	3	0.522375	0.904408	10.9458	7	7	30.1993	4.26735	4.14371	14.1353	10	7
	467afe9dac22dc45adf8f57c98e8cebe32630b9f02d20f3e453e87ce87cb526e	27	37.0634	26.8614	1	1	28.0464	5.36705	36.6545	3d8c3d72-2ee8-4fe8-bf74-9fdcdc83dc17	3	3	0.644896	1.25578	24.9585	7	7	140.427	11.9444	4.24309	27.1468	10	7
	467afe9dac22dc45adf8f57c98e8cebe32630b9f02d20f3e453e87ce87cb526e	28	24.3926	19.3137	1	1	27.1648	5.22582	47.3455	c39f30f9-37e2-4ca5-8241-dcaf8590aa34	3	3	1.1311	0.774022	15.9555	7	7	67.517	2.9875	8.81723	20.3387	10	7
	467afe9dac22dc45adf8f57c98e8cebe32630b9f02d20f3e453e87ce87cb526e	29	16.62	13.2986	1	1	27.0727	4.8021	36.6545	a3c134ed-9808-4a86-a8a1-3ca38f347f39	3	3	1.98825	0.689079	10.1145	7	7	94.4807	23.7322	4.64791	11.1867	10	7
	467afe9dac22dc45adf8f57c98e8cebe32630b9f02d20f3e453e87ce87cb526e	30	-6.21668	15.358	1	1	29.3174	3.95467	38.1818	18c0590b-a942-40a1-88f4-5173dc79e696	3	3	0.887361	1.07722	12.9224	7	7	44.4361	8.61424	6.32986	13.0916	10	7
	467afe9dac22dc45adf8f57c98e8cebe32630b9f02d20f3e453e87ce87cb526e	31	5.39533	13.166	1	1	31.401	5.36705	38.1818	3108fe7d-1438-4d94-8993-2565c120831b	3	3	0.684599	0.807321	8.7419	7	7	37.9648	9.8357	5.66772	10.093	10	7
	467afe9dac22dc45adf8f57c98e8cebe32630b9f02d20f3e453e87ce87cb526e	32	34.0741	21.343	1	1	30.9709	4.51962	35.1273	b629e6dc-f9d7-4c5f-b03c-9010d8cf38f1	3	3	0.455606	0.627177	20.8885	7	7	32.5721	6.76296	3.61556	20.8701	10	7
	467afe9dac22dc45adf8f57c98e8cebe32630b9f02d20f3e453e87ce87cb526e	33	33.2942	16.9454	1	1	29.5641	5.50829	58.0364	4e17a2b3-19e6-4c3b-b3cb-baee75230b18	3	3	0.581176	0.73408	14.4078	7	7	190.04	59.97	24.7099	11.7134	10	7
	467afe9dac22dc45adf8f57c98e8cebe32630b9f02d20f3e453e87ce87cb526e	34	9.14304	13.0376	1	1	32.7419	4.23715	38.1818	cb28ee95-4ec3-4072-b1c4-81eca0f5100c	3	3	0.302677	1.28768	9.90457	7	7	16.8253	4.3539	4.75815	11.2999	10	7
	467afe9dac22dc45adf8f57c98e8cebe32630b9f02d20f3e453e87ce87cb526e	35	23.4849	19.9159	1	1	30.4812	4.51962	33.6	966c9d84-a8a7-473e-9423-2622f1c577ed	3	3	0.466683	0.678334	15.5495	7	7	43.5733	4.41013	3.00123	19.97	10	7
	467afe9dac22dc45adf8f57c98e8cebe32630b9f02d20f3e453e87ce87cb526e	36	16.9516	15.243	1	1	30.7198	4.51962	39.7091	58153b8d-27c7-462c-aaf0-053ee6484c72	3	3	0.871452	1.2551	12.596	7	7	68.3799	6.00932	4.56482	14.2008	10	7
	467afe9dac22dc45adf8f57c98e8cebe32630b9f02d20f3e453e87ce87cb526e	37	15.5078	16.9663	1	1	33.5557	6.49696	62.6182	4b2e0609-6656-4a28-beca-d86d592e8880	3	3	0.469124	0.992017	15.4751	7	7	143.015	5.85018	10.1992	16.1323	10	7
	467afe9dac22dc45adf8f57c98e8cebe32630b9f02d20f3e453e87ce87cb526e	38	20.5469	18.1379	1	1	32.1901	4.51962	47.3455	d29bf9e1-a932-406d-8dd3-a6d35383b66d	3	3	0.445538	0.484386	17.152	7	7	69.8898	4.89975	7.86868	16.7294	10	7
	9b490046284270a293ff5af85f8c6703903e52c3323911a2ad5ba7684a8c0c19	1	7.67051	6.58249	1	1	7.33215	4.5393	42.7636	bf543ee3-0049-4043-88f7-e2e38b93f179	3	3	0.514037	0.526107	5.39874	7	7	33.5805	4.24642	12.3659	5.61972	10	7
	9b490046284270a293ff5af85f8c6703903e52c3323911a2ad5ba7684a8c0c19	2	1.58117	11.2039	1	1	9.49119	5.39041	39.7091	c29b4a9e-f73d-4424-8bc0-c9bb74fb2372	3	3	0.93098	0.773844	12.9239	7	7	67.5942	4.6471	6.21182	14.2051	10	7
	9b490046284270a293ff5af85f8c6703903e52c3323911a2ad5ba7684a8c0c19	3	11.8505	7.15654	1	1	10.0168	3.54632	35.1273	66ef59d7-fe9e-4b37-bbed-4d1fc1dd9ad4	3	3	0.331556	0.709975	5.63835	7	7	9.96582	3.02913	4.04753	5.8991	10	7
	9b490046284270a293ff5af85f8c6703903e52c3323911a2ad5ba7684a8c0c19	4	18.03	12.4062	1	1	9.46028	4.5393	41.2364	b1ac90b9-3cfe-40ae-8dc9-9c54851aef1a	3	3	0.820065	1.37282	11.2726	7	7	127.606	6.99366	9.14447	11.9972	10	7
	9b490046284270a293ff5af85f8c6703903e52c3323911a2ad5ba7684a8c0c19	5	2.75185	7.89329	1	1	10.4222	5.95783	44.2909	75c93dd6-1e30-4611-93ff-7092e93acc4a	3	3	0.398221	3.44446	5.39044	7	7	72.7938	10.2095	7.36312	6.21748	10	7
	9b490046284270a293ff5af85f8c6703903e52c3323911a2ad5ba7684a8c0c19	6	0.804514	9.04742	1	1	10.4167	3.40447	35.1273	eea12f17-d889-4b47-b432-ba6c11782234	3	3	0.292079	0.396597	8.4531	7	7	8.66593	3.63983	5.08947	6.54267	10	7
	9b490046284270a293ff5af85f8c6703903e52c3323911a2ad5ba7684a8c0c19	7	10.4089	9.84954	1	1	9.50171	4.5393	45.8182	d7e96056-e489-4d24-ac85-023a20e96f1f	3	3	0.405811	1.24093	8.50787	7	7	62.178	7.75692	16.7608	7.03649	10	7
	9b490046284270a293ff5af85f8c6703903e52c3323911a2ad5ba7684a8c0c19	8	0.37591	13.1287	1	1	9.4958	5.39041	38.1818	28639419-e729-4f40-8247-fca2cf9bbfd5	3	3	1.30179	0.587483	12.8523	7	7	125.656	10.2877	5.37723	14.3219	10	7
	9b490046284270a293ff5af85f8c6703903e52c3323911a2ad5ba7684a8c0c19	9	11.0129	10.7186	1	1	12.2031	4.25559	41.2364	1849f339-d239-4d55-8e55-46146ed5d7f1	3	3	0.81811	1.41045	8.31093	7	7	61.3114	7.30668	6.02899	9.57991	10	7
	9b490046284270a293ff5af85f8c6703903e52c3323911a2ad5ba7684a8c0c19	10	20.0131	22.3228	1	1	15.1722	4.39744	36.6545	379e670b-b97b-49fb-bbe0-c329514215b0	3	3	0.551622	0.892612	20.754	7	7	61.5281	4.63843	5.85201	22.3336	10	7
	9b490046284270a293ff5af85f8c6703903e52c3323911a2ad5ba7684a8c0c19	11	9.81715	14.4602	1	1	15.1653	4.39744	44.2909	c02f9395-f26a-4d6b-b881-a20cfb47104d	3	3	0.53021	1.50716	10.2357	7	7	68.2442	13.1294	11.6857	10.5965	10	7
	9b490046284270a293ff5af85f8c6703903e52c3323911a2ad5ba7684a8c0c19	12	31.9035	22.4262	1	1	11.6012	5.95783	39.7091	73e0a859-776a-4ce2-8f2f-b3a7223ec818	3	3	0.775911	1.13791	21.2324	7	7	185.884	18.0621	6.50905	20.3157	10	7
	9b490046284270a293ff5af85f8c6703903e52c3323911a2ad5ba7684a8c0c19	13	20.1611	8.28615	1	1	11.7593	3.68818	35.1273	fe667442-aa23-4ec1-a3e4-ba6dfe198cb3	3	3	0.34058	0.446024	6.39049	7	7	8.88258	2.45014	4.50692	6.02233	10	7
	9b490046284270a293ff5af85f8c6703903e52c3323911a2ad5ba7684a8c0c19	14	9.39469	7.68512	1	1	13.3297	3.97188	47.3455	c717d876-24db-405e-96f1-dc65520e3225	3	3	0.562356	1.18102	6.42629	7	7	36.6135	42.9743	7.36503	6.62536	10	7
	9b490046284270a293ff5af85f8c6703903e52c3323911a2ad5ba7684a8c0c19	15	11.7753	10.8869	1	1	12.2975	3.83003	54.9818	068ed97f-b197-48ae-9847-2d87be9c7b2e	3	3	0.791593	0.587542	8.78938	7	7	45.4961	4.33409	6.81473	8.57263	10	7
	9b490046284270a293ff5af85f8c6703903e52c3323911a2ad5ba7684a8c0c19	16	7.32422	15.7086	1	1	14.8094	5.95783	38.1818	91f1e802-6cf5-42e7-a85e-f19acf641438	3	3	0.427483	0.763227	16.144	7	7	68.2442	7.92539	7.23151	14.8567	10	7
	9b490046284270a293ff5af85f8c6703903e52c3323911a2ad5ba7684a8c0c19	17	4.11789	11.4005	1	1	10.4053	4.11374	38.1818	d733e178-519f-4be3-9b2b-0c3237f27001	3	3	0.528189	0.855017	10.5927	7	7	39.8633	6.33498	7.75366	11.1618	10	7
	9b490046284270a293ff5af85f8c6703903e52c3323911a2ad5ba7684a8c0c19	18	14.8831	18.3	1	1	9.95758	5.24856	38.1818	abfa00f4-dc03-4227-a42a-500c97a3c1ee	3	3	0.590795	1.19219	15.3122	7	7	103.558	13.0842	6.12756	15.9381	10	7
	9b490046284270a293ff5af85f8c6703903e52c3323911a2ad5ba7684a8c0c19	19	11.4143	9.1621	1	1	11.0178	4.68115	47.3455	22908ffa-d0ca-48db-81b0-67d809acc9d7	3	3	1.03425	1.53557	5.85152	7	7	57.1951	4.39513	5.99763	8.75228	10	7
	9b490046284270a293ff5af85f8c6703903e52c3323911a2ad5ba7684a8c0c19	20	10.7445	8.62446	1	1	12.4476	3.83003	33.6	1a409018-69d9-45a9-9473-a3dbf23dc5a6	3	3	0.396886	0.874456	6.08073	7	7	12.9989	2.18194	3.41403	11.0585	10	7
	9b490046284270a293ff5af85f8c6703903e52c3323911a2ad5ba7684a8c0c19	21	32.8051	17.8107	1	1	10.2117	4.96485	41.2364	5b3d6a6b-eabf-4278-93da-02aaa4548333	3	3	0.455012	0.797455	16.5488	7	7	92.5088	5.15613	8.88035	16.1462	10	7
	9b490046284270a293ff5af85f8c6703903e52c3323911a2ad5ba7684a8c0c19	22	26.4938	21.19	1	1	13.1558	4.823	44.2909	0b6287c3-73d7-4a03-8461-e6a269a910fa	3	3	1.17005	0.835711	19.1838	7	7	194.333	6.75414	7.01544	20.5946	10	7
	9b490046284270a293ff5af85f8c6703903e52c3323911a2ad5ba7684a8c0c19	23	11.7172	10.2724	1	1	11.4643	4.5393	35.1273	45ad8ed9-33e4-49a2-8584-bce066e18b17	3	3	0.428081	1.87509	6.50088	7	7	27.2977	3.45502	4.10783	8.77006	10	7
	9b490046284270a293ff5af85f8c6703903e52c3323911a2ad5ba7684a8c0c19	24	4.75124	11.8513	1	1	16.4194	4.5393	36.6545	9ad7ef54-ab87-4195-9c74-f12a190166d9	3	3	0.439772	0.961985	12.2886	7	7	42.463	5.17399	3.27579	14.6969	10	7
	9b490046284270a293ff5af85f8c6703903e52c3323911a2ad5ba7684a8c0c19	25	25.1606	21.2418	1	1	12.4192	5.53227	42.7636	b7640622-86cb-4363-84e1-a9dbceeb1729	3	3	1.04377	1.24705	18.3819	7	7	153.387	15.5701	8.82218	18.4776	10	7
	9b490046284270a293ff5af85f8c6703903e52c3323911a2ad5ba7684a8c0c19	26	24.0221	11.4585	1	1	15.4804	4.5393	36.6545	6800b067-2b80-4c82-8779-c519b4df943b	3	3	0.480522	0.491954	9.10626	7	7	64.5612	4.88315	4.05116	10.0729	10	7
	9b490046284270a293ff5af85f8c6703903e52c3323911a2ad5ba7684a8c0c19	27	1.22137	8.02706	1	1	12.1198	3.54632	33.6	e3380d66-6bcd-42c4-9c88-c26e51af0d5d	3	3	0.322992	0.509693	5.91605	7	7	11.699	3.76987	3.4122	7.2813	10	7
	9b490046284270a293ff5af85f8c6703903e52c3323911a2ad5ba7684a8c0c19	28	10.8363	10.3974	1	1	17.2569	3.68818	35.1273	7e7cb98c-f593-4951-9ce2-09c4579d5a72	3	3	0.342807	0.755065	10.7112	7	7	34.6637	47.7731	4.37453	8.22904	10	7
	9b490046284270a293ff5af85f8c6703903e52c3323911a2ad5ba7684a8c0c19	29	13.2616	8.76681	1	1	13.9926	4.823	48.8727	5ea70fa6-ddad-469f-8cf4-b52f71ff1dc1	3	3	1.51178	2.11265	6.42558	7	7	62.3947	9.2741	21.1512	6.79788	10	7
	9b490046284270a293ff5af85f8c6703903e52c3323911a2ad5ba7684a8c0c19	30	13.2054	12.6875	1	1	13.6488	3.68818	42.7636	124730dc-fb43-48ce-a4ce-e9f6fb7d44db	3	3	1.70969	0.759791	9.109	7	7	55.6786	3.48348	6.7545	11.3535	10	7
	9b490046284270a293ff5af85f8c6703903e52c3323911a2ad5ba7684a8c0c19	31	-5.12073	9.19889	1	1	14.3699	3.40447	42.7636	7b37a800-e962-4c6b-b37f-63d118776721	3	3	2.38327	0.517048	7.09475	7	7	55.8952	13.0103	7.81205	8.5647	10	7
	9b490046284270a293ff5af85f8c6703903e52c3323911a2ad5ba7684a8c0c19	32	13.6494	13.0341	1	1	13.4136	5.81597	195.491	9b9ba8d8-ef53-4536-9c12-72e703b54161	3	3	0.842196	0.647635	11.4459	7	7	805.715	130.665	163.255	8.05592	10	7
	9b490046284270a293ff5af85f8c6703903e52c3323911a2ad5ba7684a8c0c19	33	2.18496	8.34529	1	1	13.0689	4.68115	44.2909	e7113859-33e4-44db-bfd5-3a5260f53877	3	3	0.759357	0.442202	7.98915	7	7	62.3947	15.9478	9.21186	8.16071	10	7
	9b490046284270a293ff5af85f8c6703903e52c3323911a2ad5ba7684a8c0c19	34	21.9317	20.6227	1	1	13.6881	5.81597	38.1818	b3a43611-9bfd-4bdf-b3a4-9e5945852d33	3	3	1.18098	1.33393	16.8127	7	7	289.009	71.0948	8.50367	16.8339	10	7
	9b490046284270a293ff5af85f8c6703903e52c3323911a2ad5ba7684a8c0c19	35	27.3307	12.4073	1	1	11.8282	5.24856	44.2909	855587f5-1582-4341-b8b0-03556f5ae84e	3	3	0.539855	0.794244	11.5206	7	7	299.841	121.148	6.12838	9.18537	10	7
	9b490046284270a293ff5af85f8c6703903e52c3323911a2ad5ba7684a8c0c19	36	25.8354	11.6333	1	1	14.9186	5.24856	51.9273	0be014fb-09e4-42ff-89c8-5e32849289d0	3	3	1.62551	2.4329	6.89061	7	7	110.057	4.67784	20.1406	9.41993	10	7
	9b490046284270a293ff5af85f8c6703903e52c3323911a2ad5ba7684a8c0c19	37	10.1828	13.3175	1	1	15.6619	5.67412	35.1273	4ded99d9-96b3-434b-bc16-719aad80044b	3	3	0.415752	0.623344	10.5235	7	7	55.2453	5.72988	4.0144	11.3771	10	7
	9b490046284270a293ff5af85f8c6703903e52c3323911a2ad5ba7684a8c0c19	38	16.2917	15.8076	1	1	20.1452	3.97188	35.1273	a947f57e-77d5-483e-8a2c-1b18feb444e7	3	3	0.340074	0.869727	14.4802	7	7	22.9647	7.16582	3.47301	13.9629	10	7
	9b490046284270a293ff5af85f8c6703903e52c3323911a2ad5ba7684a8c0c19	39	25.5147	9.61125	1	1	15.2686	3.54632	36.6545	0d355cff-5de6-44a2-856a-caf159f9c6cd	3	3	0.901404	1.05382	6.12832	7	7	26.4311	16.2383	4.44689	6.67538	10	7
	9b490046284270a293ff5af85f8c6703903e52c3323911a2ad5ba7684a8c0c19	40	14.2946	14.237	1	1	12.0158	5.10671	45.8182	5913f48f-fdee-4058-88d4-165c2d525d48	3	3	1.47434	0.847691	11.6792	7	7	170.285	17.0897	6.47977	12.5311	10	7
	9b490046284270a293ff5af85f8c6703903e52c3323911a2ad5ba7684a8c0c19	41	9.79602	7.65188	1	1	12.03	3.40447	44.2909	2eb45b61-82ce-4d4f-8115-0449ca10ca2e	3	3	0.631669	0.409875	6.93401	7	7	16.8986	2.11247	4.86196	10.3073	10	7
	9b490046284270a293ff5af85f8c6703903e52c3323911a2ad5ba7684a8c0c19	42	24.3223	13.8786	1	1	15.892	4.68115	56.5091	36c1a47a-c48f-473b-807a-149c99ffad95	3	3	0.768066	0.793632	9.78861	7	7	139.088	7.66033	6.57254	10.5743	10	7
	9b490046284270a293ff5af85f8c6703903e52c3323911a2ad5ba7684a8c0c19	43	16.0064	12.5817	1	1	14.2879	3.97188	62.6182	2af1cec5-00a6-4b04-98f0-48ca9076a36d	3	3	1.45901	1.0144	7.88448	7	7	102.908	13.5784	31.8065	8.4055	10	7
	9b490046284270a293ff5af85f8c6703903e52c3323911a2ad5ba7684a8c0c19	44	9.44199	11.6967	1	1	21.0194	3.40447	42.7636	e6180eaa-b644-4337-9488-31a3a31834ea	3	3	0.523601	0.502192	10.2141	7	7	17.7652	2.90747	4.62625	13.792	10	7
	9b490046284270a293ff5af85f8c6703903e52c3323911a2ad5ba7684a8c0c19	45	4.50134	8.65324	1	1	16.7926	3.83003	41.2364	77f70128-a870-4f48-bdc9-71e6382ef177	3	3	0.382305	0.509943	8.23266	7	7	21.4482	4.09607	10.069	8.06967	10	7
	9b490046284270a293ff5af85f8c6703903e52c3323911a2ad5ba7684a8c0c19	46	13.7044	13.4418	1	1	15.2537	6.24153	58.0364	40975aa7-a180-49f1-a030-86a08da4c60e	3	3	0.552636	0.81231	13.5782	7	7	240.48	32.6396	22.9827	12.205	10	7
	9b490046284270a293ff5af85f8c6703903e52c3323911a2ad5ba7684a8c0c19	47	25.6253	14.3843	1	1	15.3113	6.09968	87.0545	17b0f8ca-fe5b-4fbb-9fb8-1554dff32a99	3	3	2.08589	0.96176	10.2115	7	7	508.69	99.1857	54.8131	8.66292	10	7
	9b490046284270a293ff5af85f8c6703903e52c3323911a2ad5ba7684a8c0c19	48	8.2897	11.7154	1	1	21.5306	3.68818	33.6	f0f1a8da-262d-4eeb-afa8-f4ccb8aa9af8	3	3	0.448179	0.571867	9.62299	7	7	11.9157	2.80501	2.72768	13.6669	10	7
	c7a853c2abef3faa98ad0a21067536a18ce2266b846a91add8f0b55cc15fa70c	1	16.6111	8.30177	1	1	10.8233	4.5949	42.7636	7f8c4968-8bc7-4c61-8a7b-e0d4f07762f4	3	3	0.378082	1.53605	6.60945	7	7	33.3871	12.8738	6.2301	6.81251	10	7
	c7a853c2abef3faa98ad0a21067536a18ce2266b846a91add8f0b55cc15fa70c	2	6.62172	8.5064	1	1	10.9773	3.62023	36.6545	aabf8414-3da6-4765-817e-613b05b21b49	3	3	0.32375	0.465234	6.75855	7	7	8.71892	2.2108	4.45274	8.24918	10	7
	c7a853c2abef3faa98ad0a21067536a18ce2266b846a91add8f0b55cc15fa70c	3	7.77811	8.03733	1	1	10.8647	3.89871	35.1273	82bfa6dc-084f-4375-a7aa-0c19cbd300cb	3	3	0.299542	0.656684	6.81758	7	7	9.14424	2.63007	3.31845	7.89701	10	7
	c7a853c2abef3faa98ad0a21067536a18ce2266b846a91add8f0b55cc15fa70c	4	19.714	14.2682	1	1	10.7788	5.56958	50.4	6d7b8bd8-f364-4735-bc7e-7b462a3b3c13	3	3	0.695849	1.43537	11.9473	7	7	109.306	4.02727	13.1478	12.8741	10	7
	c7a853c2abef3faa98ad0a21067536a18ce2266b846a91add8f0b55cc15fa70c	5	10.6768	11.4464	1	1	10.1634	6.40502	50.4	84a4f42d-a383-454b-9351-68b05dda5d69	3	3	0.577282	0.790297	11.6089	7	7	212.869	12.9821	6.43623	11.6633	10	7
	c7a853c2abef3faa98ad0a21067536a18ce2266b846a91add8f0b55cc15fa70c	6	4.1265	12.257	1	1	10.6072	5.01262	50.4	8ef5e7f5-639c-4181-ba6f-6cb3aaa70423	3	3	1.89283	0.684091	9.70845	7	7	140.991	23.3107	11.5764	10.4976	10	7
	c7a853c2abef3faa98ad0a21067536a18ce2266b846a91add8f0b55cc15fa70c	7	13.483	11.1013	1	1	9.66345	4.5949	54.9818	cf05927d-1999-4c51-8239-d0b186358910	3	3	2.07751	0.968795	8.25753	7	7	99.736	4.18517	22.9082	9.59542	10	7
	c7a853c2abef3faa98ad0a21067536a18ce2266b846a91add8f0b55cc15fa70c	8	1.07306	9.38465	1	1	10.3042	3.75947	38.1818	8544efe6-f416-4640-b692-59adfd550431	3	3	0.447719	0.472574	6.66793	7	7	11.2708	2.60233	5.65343	9.74447	10	7
	c7a853c2abef3faa98ad0a21067536a18ce2266b846a91add8f0b55cc15fa70c	9	15.4283	12.1862	1	1	11.2047	5.2911	36.6545	19f8b26a-e9a6-4df0-814f-1b9a586247ec	3	3	0.817748	0.767099	12.0728	7	7	72.9412	19.5966	5.55766	12.5975	10	7
	c7a853c2abef3faa98ad0a21067536a18ce2266b846a91add8f0b55cc15fa70c	10	11.641	9.09672	1	1	10.5005	4.5949	35.1273	e6e878ee-21fa-412c-9c8a-cf460216470a	3	3	1.01648	0.759472	8.17497	7	7	43.1693	11.2118	3.89213	10.8862	10	7
	c7a853c2abef3faa98ad0a21067536a18ce2266b846a91add8f0b55cc15fa70c	11	36.7943	28.9213	1	1	10.5107	6.54425	41.2364	53d0dc91-2cbd-4325-ab33-e33b8b822d1a	3	3	0.758706	1.22738	24.5751	7	7	336.848	44.9325	6.46916	24.5315	10	7
	c7a853c2abef3faa98ad0a21067536a18ce2266b846a91add8f0b55cc15fa70c	12	7.17863	7.27527	1	1	10.1588	4.03794	38.1818	d6778a0c-0b94-4207-9278-ac7a0aa20015	3	3	0.493906	0.926825	5.28962	7	7	16.7999	2.39918	8.17311	7.28167	10	7
	c7a853c2abef3faa98ad0a21067536a18ce2266b846a91add8f0b55cc15fa70c	13	9.14166	13.8471	1	1	11.1866	6.54425	41.2364	d5002c5c-8190-4951-b8ac-ebcf1feb9036	3	3	1.4015	1.44522	13.1745	7	7	304.737	31.7818	9.39149	13.1334	10	7
	c7a853c2abef3faa98ad0a21067536a18ce2266b846a91add8f0b55cc15fa70c	14	8.73978	7.9592	1	1	10.3844	4.31642	58.0364	827d70a7-48fe-4a57-ac41-696de39ee476	3	3	3.37736	3.05654	3.67999	7	7	55.0781	3.67789	8.74709	7.16484	10	7
	c7a853c2abef3faa98ad0a21067536a18ce2266b846a91add8f0b55cc15fa70c	15	18.6301	8.30491	1	1	10.1412	3.62023	38.1818	857218f9-2c0e-433e-a7ae-aff3d6c16024	3	3	0.378215	0.541017	6.24612	7	7	9.35689	2.55339	4.36821	8.27834	10	7
	c7a853c2abef3faa98ad0a21067536a18ce2266b846a91add8f0b55cc15fa70c	16	31.8559	9.03106	1	1	9.73089	3.62023	38.1818	e7602a4d-99e3-4197-91d9-53a87a60e234	3	3	0.409717	0.67849	5.09238	7	7	10.4202	2.24306	4.04812	9.72313	10	7
	c7a853c2abef3faa98ad0a21067536a18ce2266b846a91add8f0b55cc15fa70c	17	8.65637	12.9225	1	1	9.74377	4.45566	39.7091	c6d2fd58-2511-4012-beff-e0153e894025	3	3	0.968424	1.18142	10.6328	7	7	59.5439	6.4201	6.00931	12.4324	10	7
	c7a853c2abef3faa98ad0a21067536a18ce2266b846a91add8f0b55cc15fa70c	18	5.85607	12.1039	1	1	9.71423	4.87338	41.2364	a1fdcf87-8b03-4fa4-8737-1fe32b47c372	3	3	1.16157	0.707491	10.3424	7	7	130.571	20.1039	6.58974	10.5891	10	7
	c7a853c2abef3faa98ad0a21067536a18ce2266b846a91add8f0b55cc15fa70c	19	46.5924	27.1672	1	1	10.3347	5.15186	39.7091	43954ab7-b38a-4a94-9b02-54808995dc00	3	3	0.728449	0.991282	25.3368	7	7	179.908	7.24846	8.75977	27.3395	10	7
	c7a853c2abef3faa98ad0a21067536a18ce2266b846a91add8f0b55cc15fa70c	20	8.17898	8.6059	1	1	11.1596	6.40502	44.2909	3173ef28-fb0f-40d4-b042-1cb0b87e0910	3	3	1.30366	2.23629	5.15559	7	7	111.007	49.877	5.56334	5.09386	10	7
	c7a853c2abef3faa98ad0a21067536a18ce2266b846a91add8f0b55cc15fa70c	21	11.3421	8.14841	1	1	9.57991	6.12654	35.1273	db3c3e91-930a-4bed-9065-d722c75fa88d	3	3	0.310201	0.902991	5.5724	7	7	31.8985	6.53427	3.73942	6.28895	10	7
	c7a853c2abef3faa98ad0a21067536a18ce2266b846a91add8f0b55cc15fa70c	22	-2.09131	8.30469	1	1	10.487	3.48099	39.7091	93c78f68-b434-492f-99ed-88f2fd5ccf8e	3	3	0.354355	0.692026	6.59953	7	7	13.8227	2.45638	6.69967	7.82099	10	7
	c7a853c2abef3faa98ad0a21067536a18ce2266b846a91add8f0b55cc15fa70c	23	0.793971	9.36758	1	1	10.1774	5.43034	45.8182	d48a7784-8159-4ef9-80cc-12479a8fe005	3	3	0.591375	2.17543	5.05297	7	7	51.8882	3.70782	15.7677	6.89232	10	7
	c7a853c2abef3faa98ad0a21067536a18ce2266b846a91add8f0b55cc15fa70c	24	11.8823	8.85786	1	1	10.1821	4.45566	42.7636	b2002f03-a5f0-4b28-809c-6a378d482675	3	3	0.581045	0.618654	8.45322	7	7	46.5718	4.44119	4.45301	10.347	10	7
	c7a853c2abef3faa98ad0a21067536a18ce2266b846a91add8f0b55cc15fa70c	25	21.1298	14.953	1	1	10.6252	6.12654	36.6545	060c9f7d-d5ea-4af4-9e7d-729bc7c3a310	3	3	0.776143	0.779549	14.7937	7	7	562.902	115.948	5.95495	12.0691	10	7
	c7a853c2abef3faa98ad0a21067536a18ce2266b846a91add8f0b55cc15fa70c	26	13.0426	7.9633	1	1	11.5525	5.43034	77.8909	98045c33-34e9-4181-bbf8-74ae62bab009	3	3	0.811842	2.34713	6.69186	7	7	124.829	8.84767	38.2313	6.41185	10	7
[truncated: 562 more rows]

## Sheet: stage
Database key:	experiment_id	end	max	mean	min	name	percentile001	percentile999	spark_analysis	stage_id	start
[truncated: 82 more rows]
